# Supplementary material for: Organocatalytic enantioselective [2 + 2] cycloadditions towards chiral fused α-trifluoromethyl azetidines
Source: Royal Society of Chemistry journal article supplement (doi:10.1039/d4qo01942c), 2024-12-19

---

SUPPORTING INFORMATION

**Organocatalytic Enantioselective [2 + 2] Cycloadditions  
towards Chiral Fused  $\alpha$ -Trifluoromethyl Azetidines**

Song Zhang<sup>†,a</sup>, Xingjie Luo<sup>†,a</sup>, Siqiang Fang<sup>†,a</sup>, Jia-Hong Wu<sup>a</sup>, Jianke Pan<sup>a</sup>, Zhipeng Xu<sup>\*,b</sup>,  
and Tianli Wang<sup>\*,a</sup>

---

<sup>a</sup> Key Laboratory of Green Chemistry & Technology, Ministry of Education, College of Chemistry, Sichuan University, Chengdu 610064, China. E-mail: [wangtl@scu.edu.cn](mailto:wangtl@scu.edu.cn)

<sup>b</sup> College of Water Resource and Hydropower, Sichuan University, 29 Wangjiang Road, Chengdu 610064, P. R. China. E-mail: [zpxu@scu.edu.cn](mailto:zpxu@scu.edu.cn)

<sup>†</sup> These authors contributed equally to this work.

**Table of Contents**

|                                                                            |           |
|----------------------------------------------------------------------------|-----------|
| <b>1. General information .....</b>                                        | <b>2</b>  |
| <b>2. Optimization of reaction conditions .....</b>                        | <b>3</b>  |
| <b>3. Preparation of phosphonium salt catalysts.....</b>                   | <b>5</b>  |
| <b>4. Preparation of both types of substrates .....</b>                    | <b>7</b>  |
| <b>5. General procedure for the asymmetric [2 + 2] Cycloaddition. ....</b> | <b>14</b> |
| <b>6. Gram-scale preparations and transformations.....</b>                 | <b>59</b> |
| <b>7. Determination of absolute configuration of products.....</b>         | <b>65</b> |
| <b>8. Mechanistic studies .....</b>                                        | <b>67</b> |
| <b>9. References.....</b>                                                  | <b>69</b> |
| <b>11. NMR spectra.....</b>                                                | <b>70</b> |

---

## 1. General information

All the starting materials were obtained from commercial sources and used without further purification unless otherwise stated.  $^1\text{H}$  and  $^{13}\text{C}$  NMR spectra were recorded on a Bruker AVANCE III HD (400 MHz) spectrometer in  $\text{CDCl}_3$ . Chemical shifts ( $\delta$ ) are reported in ppm, and the residual solvent peak was used as an internal reference  $\text{CDCl}_3$  [ $\delta$  ( $^1\text{H}$ ) = 7.26 ppm,  $\delta$  ( $^{13}\text{C}$ ) = 77.16 ppm],  $\text{CD}_3\text{OD}$  [ $\delta$  ( $^1\text{H}$ ) = 2.05 ppm,  $\delta$  ( $^{13}\text{C}$ ) = 206.26, 29.84 ppm],  $(\text{CD}_3)_2\text{CO}$  [ $\delta$  ( $^1\text{H}$ ) = 3.31 ppm,  $\delta$  ( $^{13}\text{C}$ ) = 49.00 ppm]. Multiplicity was indicated as follows: s (singlet), d (doublet), t (triplet), q (quartet), m (multiplet), dd (doublet of doublet), br s (broad singlet). Coupling constants ( $J$ ) were reported in Hertz (Hz). All high resolution mass spectra were obtained on a Thermo LTQ mass spectrometer. For thin layer chromatography (TLC), Merck pre-coated TLC plates (Merck 60 F254) were used, and compounds were visualized with a UV light at 254 nm. Further visualization was achieved by staining with iodine, followed by heating on a hot plate. Flash chromatographic separations were performed on Merck 60 (0.040-0.063 mm) mesh silica gel. Enantiomeric excesses were determined by HPLC analysis using chiral column described below in detail. Optical rotations were measured with polarimeter.

All the phosphonium salt catalysts **P1-P8** used in this study were prepared via a P-alkylation reaction of our previously reported organophosphines according to the known procedures.<sup>[1]</sup> All the cyclic trifluoroketimines **1** and Allene **2** were synthesized following the methods reported in the literature.<sup>[2-3]</sup> The structure and absolute configurations of chiral fused Azetidines scaffolds were assigned by X-ray crystallographic analysis of the single crystal of chiral product **3f** (Table S5).

## 2. Optimization of reaction conditions

**Table S1.** Screening of the chiral phosphonium salt catalysts.<sup>[a]</sup>

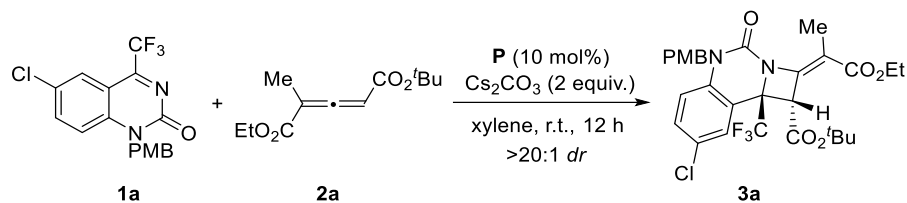

| Entry | <b>P</b>  | yield (%) <sup>[b]</sup> | ee (%) <sup>[c]</sup> |
|-------|-----------|--------------------------|-----------------------|
| 1     | <b>P1</b> | 81                       | 5                     |
| 2     | <b>P2</b> | 82                       | 8                     |
| 3     | <b>P3</b> | 79                       | 4                     |
| 4     | <b>P4</b> | 85                       | 5                     |
| 5     | <b>P5</b> | 78                       | 12                    |
| 6     | <b>P6</b> | 73                       | 23                    |
| 7     | <b>P7</b> | 74                       | 34                    |
| 8     | <b>P8</b> | 80                       | 52                    |

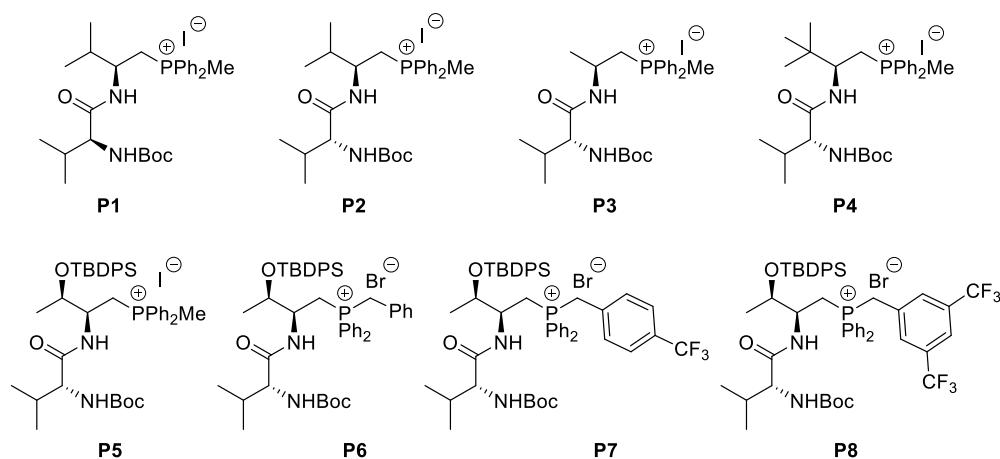

[a] Reaction condition: substrates **1a** (0.1 mmol), **2a** (0.11 mmol), Cs<sub>2</sub>CO<sub>3</sub> (0.2 mmol) and **P** (0.001 mmol) in 1 mL xylene at room temperature for 12 h. [b] Isolated yields based on **1a**. [c] The ee values were determined by chiral HPLC analysis. *dr* values were analyzed by <sup>1</sup>H NMR spectroscopy. TBDPS = *tert*-butyldiphenylsilyl.

**Table S2.** Screening of the solvents.<sup>[a]</sup>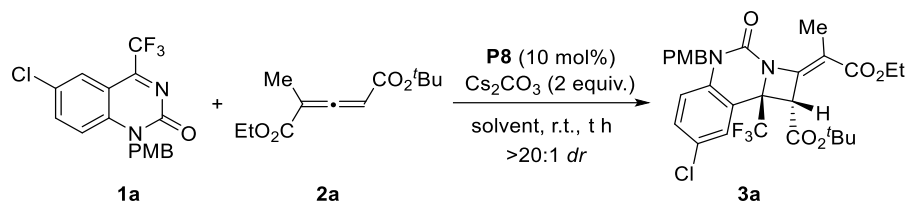

| Entry | solvent                  | t (h) | yield (%) <sup>[b]</sup> | ee (%) <sup>[c]</sup> |
|-------|--------------------------|-------|--------------------------|-----------------------|
| 1     | xylene                   | 12    | 80                       | 52                    |
| 2     | toluene                  | 12    | 72                       | 37                    |
| 3     | $\text{CH}_2\text{Cl}_2$ | 12    | 81                       | 6                     |
| 4     | $\text{CHCl}_3$          | 12    | 77                       | 3                     |
| 5     | $\text{Et}_2\text{O}$    | 12    | 79                       | 21                    |
| 6     | <i>n</i> -hexane         | 72    | 82                       | 72                    |
| 7     | PE                       | 72    | 83                       | 82                    |
| 8     | <i>n</i> -pentane        | 72    | 80                       | 86                    |
| 9     | <i>c</i> -pentane        | 72    | 87                       | 78                    |
| 10    | <i>n</i> -heptane        | 72    | 92                       | 91                    |
| 11    | <i>n</i> -octane         | 72    | 96                       | 98                    |

[a] Reaction condition: substrates **1a** (0.1 mmol), **2a** (0.11 mmol),  $\text{Cs}_2\text{CO}_3$  (0.2 mmol) and **P8** (0.001 mmol) in 1 mL solvent at room temperature for 12-72 h. [b] Isolated yields based on **1a**. [c] The ee values were determined by chiral HPLC analysis. *dr* values were analyzed by  $^1\text{H}$  NMR spectroscopy.

**Table S3.** Screening of the bases.<sup>[a]</sup>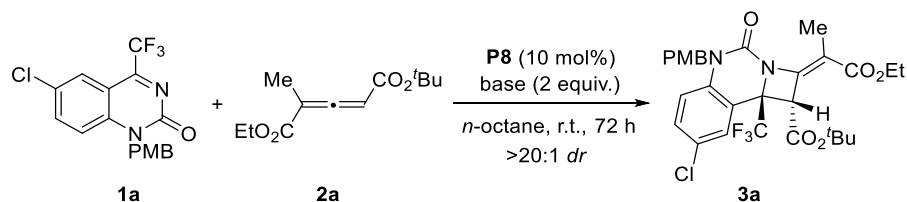

| Entry | base                     | yield (%) <sup>[b]</sup> | ee (%) <sup>[c]</sup> |
|-------|--------------------------|--------------------------|-----------------------|
| 1     | $\text{Cs}_2\text{CO}_3$ | 96                       | 98                    |
| 2     | $\text{Na}_2\text{CO}_3$ | trace                    | -                     |
| 3     | $\text{K}_2\text{CO}_3$  | 86                       | 82                    |



|                   |                                                   |    |    |
|-------------------|---------------------------------------------------|----|----|
| 4                 | K <sub>3</sub> PO <sub>4</sub>                    | 76 | 16 |
| 5                 | K <sub>3</sub> PO <sub>4</sub> ·7H <sub>2</sub> O | 81 | 26 |
| 6                 | NaOH                                              | 73 | 32 |
| 7                 | KOH                                               | 65 | 0  |
| 8                 | DBU                                               | 78 | 0  |
| 9 <sup>[d]</sup>  | Cs <sub>2</sub> CO <sub>3</sub>                   | 56 | 92 |
| 10 <sup>[e]</sup> | Cs <sub>2</sub> CO <sub>3</sub>                   | 94 | 96 |
| 11 <sup>[f]</sup> | Cs <sub>2</sub> CO <sub>3</sub>                   | 91 | 86 |

[a] Reaction condition: substrates **1a** (0.1 mmol), **2a** (0.11 mmol), base (0.2 mmol) and **P8** (0.001 mmol) in 1 mL *n*-octane at room temperature for 72 h. [b] Isolated yields based on **1a**. [c] The ee values were determined by chiral HPLC analysis. *dr* values were analyzed by <sup>1</sup>H NMR spectroscopy. [d] Cs<sub>2</sub>CO<sub>3</sub> (0.1 mmol) was used. [e] Cs<sub>2</sub>CO<sub>3</sub> (0.4 mmol). [f] Cs<sub>2</sub>CO<sub>3</sub> (0.8 mmol).

**Table S4.** Screening of the catalyst loading and temperature.<sup>[a]</sup>

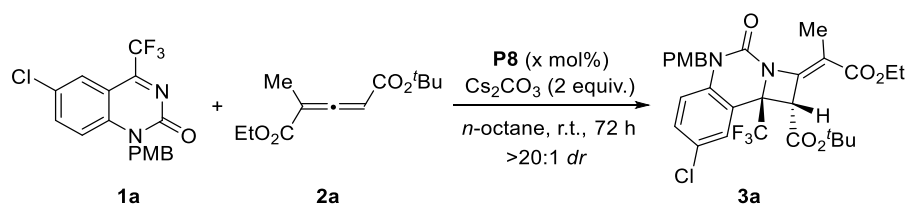

| Entry            | <b>P8</b> (mol%) | yield (%) <sup>[b]</sup> | ee (%) <sup>[c]</sup> |
|------------------|------------------|--------------------------|-----------------------|
| 1                | 10               | 96                       | 98                    |
| 2 <sup>[d]</sup> | 10               | trace                    | -                     |
| 3                | 5                | 95                       | 98                    |
| 4                | 2.5              | 96                       | 98                    |
| 5                | 1                | 96                       | 98                    |

[a] Reaction condition: substrates **1a** (0.1 mmol), **2a** (0.11 mmol), Cs<sub>2</sub>CO<sub>3</sub> (0.2 mmol) and **P8** (x mmol) in 1 mL *n*-octane at room temperature for 72 h. [b] Isolated yields based on **1a**. [c] The ee values were determined by chiral HPLC analysis. *dr* values were analyzed by <sup>1</sup>H NMR spectroscopy. [d] At 0 °C.

### 3. Preparation of phosphonium salt catalysts

All the phosphonium salt catalysts in this study were listed in **Figure S1**, which

were prepared by following our previously reported procedures.<sup>[1]</sup>

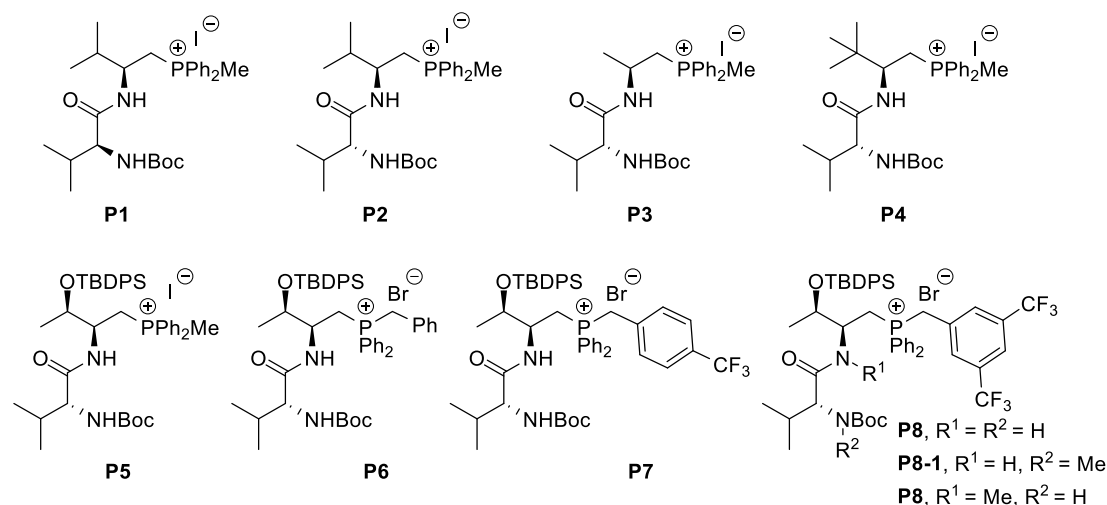

**Figure S1.** Bifunctional phosphonium salt catalysts in this study.

#### Characterization of the unknown phosphonium salts:

#### (3,5-bis(trifluoromethyl)benzyl)((2*S*,3*R*)-2-((*R*)-2-((tert-butoxycarbonyl)(methyl)amino)-3-methylbutanamido)-3-((tert-butyldiphenylsilyloxy)butyl)diphenylphosphonium bromide (P8-1)

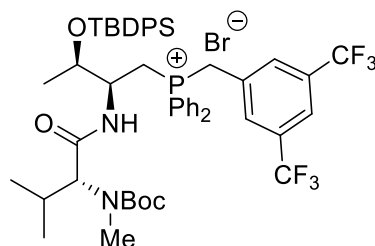

A white solid; <sup>1</sup>H NMR (400 MHz, CDCl<sub>3</sub>) δ 8.66 (d, *J* = 8.4 Hz, 1H), 7.90-7.79 (m, 3H), 7.76-7.70 (m, 1H), 7.67-7.45 (m, 11H), 7.42 (d, *J* = 7.2 Hz, 1H), 7.39-7.21 (m, 7H), 6.18 (t, *J* = 16.0 Hz, 1H), 5.53 (t, *J* = 14.4 Hz, 1H), 5.21-5.07 (m, 1H), 4.18-4.01 (m, 3H), 2.99 (s, 3H), 2.90 (t, *J* = 14.0 Hz, 2H), 1.48 (s, 9H), 1.19 (d, *J* = 6.2 Hz, 3H), 1.03 (d, *J* = 6.6 Hz, 3H), 0.95 (d, *J* = 6.5 Hz, 3H), 0.81 (s, 9H); <sup>13</sup>C NMR (101 MHz, CDCl<sub>3</sub>) δ 172.50, 157.52, 135.70, 135.59, 135.32 (d, *J* = 26.9 Hz), 133.55 (d, *J* = 9.3 Hz), 132.83, 131.04, 130.67 (d, *J* = 12.2 Hz), 130.20 (d, *J* = 12.1 Hz), 129.83, 127.71 (d, *J* = 9.8 Hz), 122.70 (q, *J* = 272.7 Hz), 115.69, 114.88, 79.78, 69.45 (d, *J* = 13.7 Hz), 65.05, 49.91, 31.56, 28.39, 28.00, 27.01, 20.96, 20.11, 19.22, 17.65; <sup>31</sup>P NMR (162 MHz, CDCl<sub>3</sub>) δ 31.16; <sup>19</sup>F NMR (376 MHz, CDCl<sub>3</sub>) δ -62.90; HRMS (ESI) *m/z* calcd for C<sub>52</sub>H<sub>62</sub>BrF<sub>6</sub>N<sub>2</sub>O<sub>4</sub>PSi [M-Br]<sup>+</sup> = 951.4115, found = 951.4108.

**(3,5-bis(trifluoromethyl)benzyl)((2S,3R)-2-((R)-2-((tert-butoxycarbonyl)amino)-N,3-dimethylbutanamido)-3-((tert-butyl)diphenylsilyl)oxy)butyl)diphenylphosphonium bromide (P8-2)**

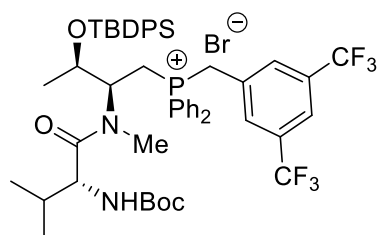

A white solid;  $^1\text{H}$  NMR (400 MHz,  $\text{CDCl}_3$ )  $\delta$  7.93 (dd,  $J = 12.8, 7.8$  Hz, 2H), 7.78-7.68 (m, 2H), 7.67-7.43 (m, 13H), 7.41-7.26 (m, 6H), 5.96 (t,  $J = 15.2$  Hz, 1H), 5.25-5.05 (m, 2H), 4.88 (t,  $J = 14.8$  Hz, 1H), 4.58 (p,  $J = 12.3$  Hz, 1H), 3.87 (dd,  $J = 8.4, 3.4$  Hz, 2H), 3.02 (t,  $J = 15.4$  Hz, 1H), 2.79 (s, 3H), 1.78-1.67 (m, 1H), 1.49 (s, 9H), 0.98 (s, 9H), 0.96 (s, 3H), 0.83 (d,  $J = 6.8$  Hz, 3H), 0.59 (d,  $J = 6.7$  Hz, 3H);  $^{13}\text{C}$  NMR (101 MHz,  $\text{CDCl}_3$ )  $\delta$  172.87, 155.58, 135.83 (d,  $J = 6.1$  Hz), 135.63, 135.42, 134.22 (d,  $J = 10.1$  Hz), 133.61 (d,  $J = 8.9$  Hz), 133.10, 132.81, 131.84 (d,  $J = 34.8$  Hz), 131.46 (d,  $J = 8.8$  Hz), 131.07, 130.23 (d,  $J = 12.1$  Hz), 130.06 (d,  $J = 4.3$  Hz), 129.93 (d,  $J = 13.0$  Hz), 128.01, 127.82, 122.69 (q,  $J = 273.1$  Hz), 121.86, 116.31 (d,  $J = 11.8$  Hz), 115.43, 79.65, 72.28 (d,  $J = 14.2$  Hz), 55.21, 52.01, 32.44, 30.33, 29.26 (d,  $J = 46.3$  Hz), 28.39, 27.12, 20.00, 19.44, 19.22, 15.77;  $^{31}\text{P}$  NMR (162 MHz,  $\text{CDCl}_3$ )  $\delta$  31.16;  $^{19}\text{F}$  NMR (376 MHz,  $\text{CDCl}_3$ )  $\delta$  -62.93; HRMS (ESI)  $m/z$  calcd for  $\text{C}_{52}\text{H}_{62}\text{BrF}_6\text{N}_2\text{O}_4\text{PSi}$   $[\text{M}-\text{Br}]^+ = 951.4115$ , found = 951.4110.

#### 4. Preparation of both types of substrates

##### A. Preparation of cyclic trifluoroketimines **1**

The all of cyclic trifluoroketimines **1** were synthesized according to the literature reports.<sup>[2]</sup>

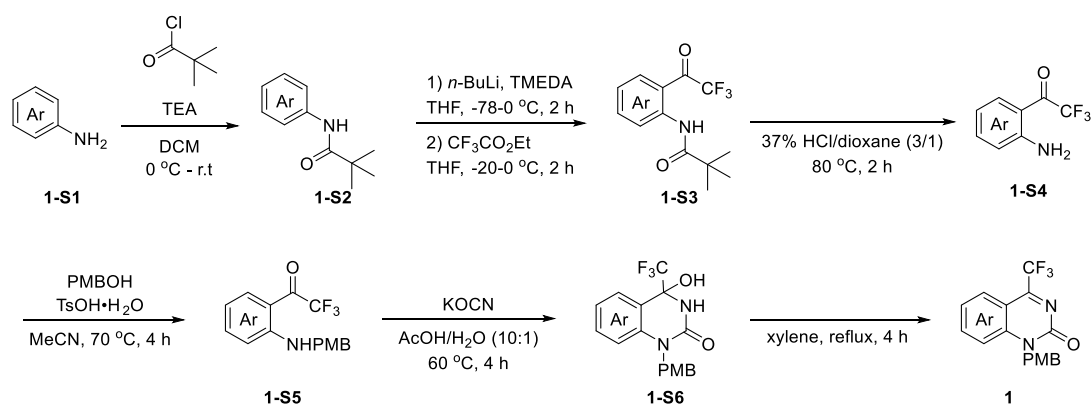

The **1a-1d** are known compounds.

## B. Preparation of Allene **2**

Allene **2** were prepared from corresponding benzyl bromide in quantitative yields following the literature procedure.<sup>[3]</sup>

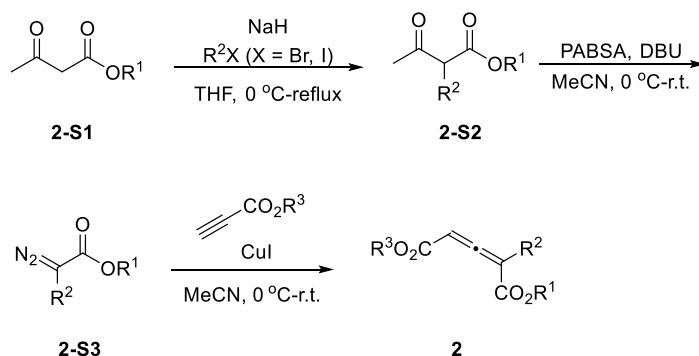

Unknown compounds **2c**, **2f-2g**, **2l**, **2n-2u**, **2r**, **2s**, **2x** were fully characterized.

### 5-(*tert*-butyl) 1-ethyl 2-isopropylpenta-2,3-dienedioate (**2c**)

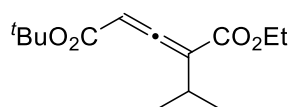

$^1\text{H}$  NMR (400 MHz,  $\text{CDCl}_3$ )  $\delta$  5.86 (d,  $J = 2.2$  Hz, 1H), 4.21 (q,  $J = 7.1$  Hz, 2H), 2.84-2.72 (m, 1H), 1.47 (s, 9H), 1.27 (t,  $J = 7.1$  Hz, 3H), 1.12 (d,  $J = 6.8$  Hz, 3H), 1.08 (d,  $J = 6.8$  Hz, 3H);  $^{13}\text{C}$  NMR (100 MHz,  $\text{CDCl}_3$ )  $\delta$  217.41, 165.28, 163.69, 111.30, 94.70, 81.59, 61.40, 28.18, 21.93, 21.85, 14.32, 1.16; HRMS (ESI<sup>+</sup>)  $m/z$  calcd for  $\text{C}_{14}\text{H}_{22}\text{O}_4$   $[\text{M}+\text{Na}]^+ = 277.1416$ , found = 277.1407.

### 5-(*tert*-butyl) 1-ethyl 2-(2-methylbenzyl)penta-2,3-dienedioate (**2f**)

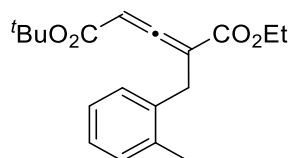

$^1\text{H}$  NMR (400 MHz,  $\text{CDCl}_3$ )  $\delta$  7.23-7.16 (m, 1H), 7.15-7.07 (m, 3H), 5.68 (t,  $J = 3.0$  Hz, 1H), 4.23 (q,  $J = 7.1$  Hz, 2H), 3.65 (ddd,  $J = 47.8, 15.8, 3.0$  Hz, 2H), 2.32 (s, 3H), 1.43 (s, 9H), 1.27 (t,  $J = 7.1$  Hz, 3H);  $^{13}\text{C}$  NMR (100 MHz,  $\text{CDCl}_3$ )  $\delta$  218.38, 165.29, 163.12, 136.68, 135.84, 130.25, 129.74, 126.99, 125.99, 104.14, 93.99, 81.75, 61.71, 32.31, 28.12, 19.59, 14.30; HRMS (ESI)  $m/z$  calcd for  $\text{C}_{19}\text{H}_{24}\text{O}_4$   $[\text{M}+\text{Na}]^+ = 339.1572$ , found = 339.1574.

**5-(tert-butyl) 1-ethyl 2-(2-fluorobenzyl)penta-2,3-dienedioate (2g)**

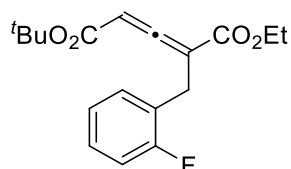

$^1\text{H}$  NMR (400 MHz,  $\text{CDCl}_3$ )  $\delta$  7.32-7.24 (m, 1H), 7.21-7.16 (m, 1H), 7.06-6.97 (m, 2H), 5.74 (t,  $J = 2.7$  Hz, 1H), 4.21 (q,  $J = 7.1$  Hz, 2H), 3.68 (ddd,  $J = 45.2, 15.5, 2.3$  Hz, 2H), 1.43 (s, 9H), 1.25 (t,  $J = 7.1$  Hz, 3H);  $^{13}\text{C}$  NMR (100 MHz,  $\text{CDCl}_3$ )  $\delta$  218.26, 164.83, 162.85, 161.04 (d,  $J = 245.0$  Hz), 131.15 (d,  $J = 4.2$  Hz), 128.50 (d,  $J = 8.0$  Hz), 124.62 (d,  $J = 15.5$  Hz), 123.84 (d,  $J = 3.6$  Hz), 115.20 (d,  $J = 21.7$  Hz), 103.25, 94.00, 81.61, 61.57, 27.96, 14.13;  $^{19}\text{F}$  NMR (376 MHz,  $\text{CDCl}_3$ )  $\delta$  -117.47; HRMS (APCI $^+$ ): calcd for  $\text{C}_{18}\text{H}_{21}\text{FO}_4$   $[\text{M}+\text{H}]^+ = 321.1502$ , found = 321.1508.

**5-(tert-butyl) 1-ethyl 2-(2-chlorobenzyl)penta-2,3-dienedioate (2h)**

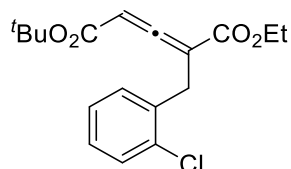

$^1\text{H}$  NMR (400 MHz,  $\text{CDCl}_3$ )  $\delta$  7.35-7.31 (m, 2H), 7.20-7.11 (m, 2H), 5.73 (t,  $J = 2.8$  Hz, 1H), 4.23 (q,  $J = 7.1$  Hz, 2H), 3.79 (ddd,  $J = 38.1, 15.6, 2.7$  Hz, 2H), 1.42 (s, 9H), 1.26 (t,  $J = 7.1$  Hz, 3H).  $^{13}\text{C}$  NMR (100 MHz,  $\text{CDCl}_3$ )  $\delta$  218.34, 164.89, 162.84, 135.37, 134.33, 130.98, 129.39, 128.14, 126.65, 103.07, 94.07, 81.62, 61.60, 32.33, 27.98, 14.15; HRMS (APCI $^+$ ): calcd for  $\text{C}_{18}\text{H}_{21}\text{ClO}_4$   $[\text{M}+\text{H}]^+ = 337.1207$ , found = 337.1202.

**5-(tert-butyl) 1-ethyl 2-(2-bromobenzyl)penta-2,3-dienedioate (2i)**

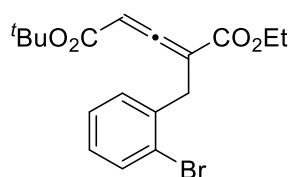

$^1\text{H}$  NMR (400 MHz,  $\text{CDCl}_3$ )  $\delta$  7.52 (d,  $J = 8.0$  Hz, 1H), 7.32 (dd,  $J = 7.6, 1.4$  Hz, 1H), 7.21 (t,  $J = 7.5$  Hz, 1H), 7.07 (t,  $J = 7.6$  Hz, 1H), 5.73 (t,  $J = 2.8$  Hz, 1H), 4.23 (q,  $J = 7.1$  Hz, 2H), 3.80 (ddd,  $J = 34.8, 15.7, 2.8$  Hz, 2H), 1.42 (s, 9H), 1.27 (t,  $J = 7.1$  Hz, 3H);  $^{13}\text{C}$  NMR (100 MHz,  $\text{CDCl}_3$ )  $\delta$  218.35, 164.86, 162.81, 137.14, 132.72, 130.94, 128.35, 127.30, 124.78, 103.17, 94.19, 81.63, 61.62, 34.89, 28.00, 14.16; HRMS (APCI $^+$ ): calcd for  $\text{C}_{18}\text{H}_{21}\text{BrO}_4$   $[\text{M}+\text{H}]^+ = 381.0701$ , found = 381.0703.

**5-(tert-butyl) 1-ethyl 2-(3-bromobenzyl)penta-2,3-dienedioate (2j)**

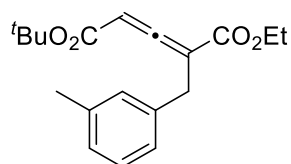

$^1\text{H}$  NMR (400 MHz,  $\text{CDCl}_3$ )  $\delta$  7.16 (t,  $J = 7.8$  Hz, 1H), 7.10-7.05 (m, 2H), 7.02 (d,  $J = 7.4$  Hz, 1H), 5.77 (t,  $J = 2.5$  Hz, 1H), 4.20 (q,  $J = 7.1$  Hz, 2H), 3.61 (ddd,  $J = 34.0, 15.2, 2.5$  Hz, 2H), 2.32 (s, 3H), 1.47 (s, 9H), 1.24 (d,  $J = 7.1$  Hz, 3H);  $^{13}\text{C}$  NMR (100 MHz,  $\text{CDCl}_3$ )  $\delta$  218.63, 165.19, 163.22, 137.97, 137.73, 129.85, 128.30, 127.53, 126.05, 104.48, 93.74, 81.78, 61.66, 34.92, 28.16, 21.52, 14.27; HRMS (ESI)  $m/z$  calcd for  $\text{C}_{19}\text{H}_{24}\text{O}_4$   $[\text{M}+\text{Na}]^+ = 339.1572$ , found = 339.1575.

**5-(tert-butyl) 1-ethyl 2-(3-bromobenzyl)penta-2,3-dienedioate (2l)**

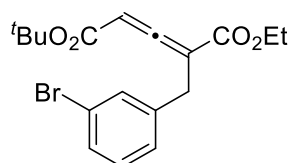

$^1\text{H}$  NMR (400 MHz,  $\text{CDCl}_3$ )  $\delta$  7.41 (s, 1H), 7.35 (t,  $J = 7.6$  Hz, 1H), 7.23-7.11 (m, 2H), 5.79 (s, 1H), 4.20 (q,  $J = 7.2$  Hz, 2H), 3.60 (ddd,  $J = 40.4, 15.2, 2.2$  Hz, 2H), 1.47 (s, 9H), 1.25 (t,  $J = 7.2$  Hz, 3H);  $^{13}\text{C}$  NMR (100 MHz,  $\text{CDCl}_3$ )  $\delta$  218.27, 164.75, 162.80, 139.97, 138.35, 133.08, 131.89, 130.15, 129.83, 129.81, 128.61, 127.63, 122.32,

122.28, 103.71, 93.92, 81.89, 61.66, 39.48, 34.49, 28.01, 14.12; HRMS (APCI<sup>+</sup>): calcd for C<sub>18</sub>H<sub>21</sub>BrO<sub>4</sub> [M+H]<sup>+</sup> = 381.0701, found = 381.0705.

**5-(tert-butyl) 1-ethyl 2-(4-fluorobenzyl)penta-2,3-dienedioate (2n)**

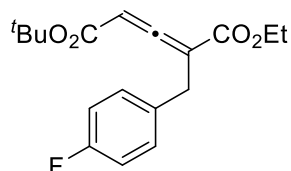

<sup>1</sup>H NMR (400 MHz, CDCl<sub>3</sub>) δ 7.26-7.20 (m, 2H), 6.95 (t, *J* = 8.7 Hz, 2H), 5.78 (t, *J* = 2.5 Hz, 1H), 4.20 (qd, *J* = 7.1, 1.2 Hz, 2H), 3.61 (ddd, *J* = 41.6, 15.2, 2.6 Hz, 2H), 1.46 (s, 9H), 1.24 (t, *J* = 7.1 Hz, 3H); <sup>13</sup>C NMR (100 MHz, CDCl<sub>3</sub>) δ 218.31, 164.87, 162.90, 161.74 (d, *J* = 243.0 Hz), 133.40 (d, *J* = 3.2 Hz), 130.44 (d, *J* = 7.9 Hz), 115.08 (d, *J* = 21.2 Hz), 104.29, 93.76, 81.79, 61.58, 34.17, 28.04, 14.12; <sup>19</sup>F NMR (376 MHz, CDCl<sub>3</sub>) δ -116.48; HRMS (APCI<sup>+</sup>): calcd for C<sub>18</sub>H<sub>21</sub>FO<sub>4</sub> [M+H]<sup>+</sup> = 321.1502, found = 321.1503.

**5-(tert-butyl) 1-ethyl 2-(4-chlorobenzyl)penta-2,3-dienedioate (2o)**

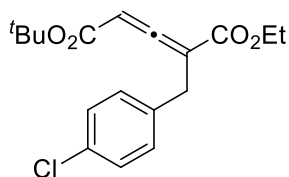

<sup>1</sup>H NMR (400 MHz, CDCl<sub>3</sub>) δ 7.26-7.19 (m, 4H), 5.79 (t, *J* = 2.4 Hz, 1H), 4.20 (qd, *J* = 7.1, 1.1 Hz, 2H), 3.61 (ddd, *J* = 41.3, 15.2, 2.6 Hz, 2H), 1.47 (s, 9H), 1.25 (t, *J* = 7.1 Hz, 3H); <sup>13</sup>C NMR (100 MHz, CDCl<sub>3</sub>) δ 218.29, 164.81, 162.85, 136.25, 132.48, 130.30, 128.43, 103.94, 93.81, 81.87, 61.63, 34.33, 28.05, 14.13; HRMS (APCI<sup>+</sup>): calcd for C<sub>18</sub>H<sub>21</sub>ClO<sub>4</sub> [M+H]<sup>+</sup> = 337.1207, found = 337.1205.

**5-(tert-butyl) 1-ethyl 2-(4-(tert-butyl)benzyl)penta-2,3-dienedioate (2p)**

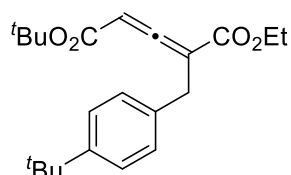

<sup>1</sup>H NMR (400 MHz, CDCl<sub>3</sub>) δ 7.30 (d, *J* = 8.4 Hz, 2H), 7.21 (d, *J* = 8.4 Hz, 2H), 5.78 (t, *J* = 2.4 Hz, 1H), 4.21 (q, *J* = 7.0 Hz, 2H), 3.62 (ddd, *J* = 37.1, 18.6, 2.4 Hz, 2H), 1.46

(s, 9H), 1.30 (s, 9H), 1.25 (t,  $J = 7.1$  Hz, 3H);  $^{13}\text{C}$  NMR (100 MHz,  $\text{CDCl}_3$ )  $\delta$  218.54, 165.06, 163.07, 149.38, 134.74, 128.57, 125.19, 104.32, 93.53, 81.59, 61.48, 34.40, 34.36, 31.36, 28.05, 14.15; HRMS (APCI $^+$ ): calcd for  $\text{C}_{22}\text{H}_{31}\text{O}_4$   $[\text{M}+\text{H}]^+ = 359.2222$ , found = 359.2225.

**5-(*tert*-butyl) 1-ethyl 2-(3,5-dimethoxybenzyl)penta-2,3-dienedioate (2r)**

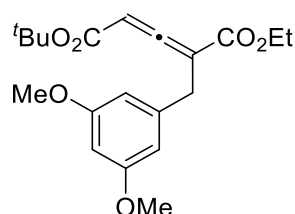

$^1\text{H}$  NMR (400 MHz,  $\text{CDCl}_3$ )  $\delta$  6.43 (d,  $J = 2.2$  Hz, 2H), 6.31 (t,  $J = 2.2$  Hz, 1H), 5.79 (t,  $J = 2.5$  Hz, 1H), 4.21 (q,  $J = 7.0$  Hz, 1H), 3.76 (s, 6H), 3.58 (ddd,  $J = 36.3, 15.2, 2.6$  Hz, 2H), 1.45 (s, 9H), 1.25 (t,  $J = 7.1$  Hz, 3H).  $^{13}\text{C}$  NMR (100 MHz,  $\text{CDCl}_3$ )  $\delta$  218.55, 165.01, 163.02, 160.72, 139.99, 107.03, 104.22, 98.70, 93.74, 81.75, 61.57, 55.24, 35.05, 27.98, 14.15; HRMS (APCI $^+$ ): calcd for  $\text{C}_{20}\text{H}_{26}\text{O}_6$   $[\text{M}+\text{H}]^+ = 363.1808$ , found = 363.1813.

**5-(*tert*-butyl) 1-ethyl 2-(3,5-difluorobenzyl)penta-2,3-dienedioate (2s)**

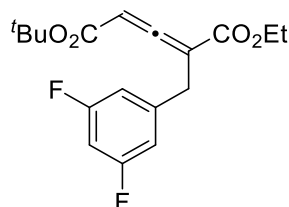

$^1\text{H}$  NMR (400 MHz,  $\text{CDCl}_3$ )  $\delta$  6.91-6.73 (m, 2H), 6.65 (t,  $J = 9.0$  Hz, 1H), 5.82 (t,  $J = 2.3$  Hz, 1H), 4.21 (q,  $J = 7.1$  Hz, 2H), 3.61 (ddd,  $J = 49.5, 15.3, 2.2$  Hz, 2H), 1.47 (s, 9H), 1.25 (t,  $J = 7.1$  Hz, 3H);  $^{13}\text{C}$  NMR (100 MHz,  $\text{CDCl}_3$ )  $\delta$  218.24, 164.63, 162.97 (d,  $J = 246.7$  Hz), 162.84 (d,  $J = 246.6$  Hz), 162.69, 141.68 (t,  $J = 9.2$  Hz), 111.78 (d,  $J = 11.6$  Hz), 111.78 (d,  $J = 24.9$  Hz), 103.11, 102.21 (t,  $J = 25.2$  Hz), 94.02, 82.14, 61.74, 34.64, 27.97, 14.11;  $^{19}\text{F}$  NMR (376 MHz,  $\text{CDCl}_3$ )  $\delta$  -110.22; HRMS (APCI $^+$ ): calcd for  $\text{C}_{18}\text{H}_{21}\text{F}_2\text{O}_4$   $[\text{M}+\text{H}]^+ = 339.1408$ , found = 339.1405.

**5-(*tert*-butyl) 1-isopropyl 2-methylpenta-2,3-dienedioate (2t)**



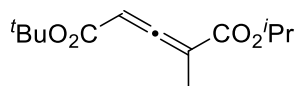

$^1\text{H}$  NMR (400 MHz,  $\text{CDCl}_3$ )  $\delta$  5.78 (q,  $J = 2.9$  Hz, 1H), 5.13-4.98 (m, 1H), 1.95 (d,  $J = 2.9$  Hz, 3H), 1.47 (s, 9H), 1.25 (d,  $J = 2.7$  Hz, 3H), 1.24 (d,  $J = 2.7$  Hz, 3H);  $^{13}\text{C}$  NMR (100 MHz,  $\text{CDCl}_3$ )  $\delta$  218.10, 165.38, 163.60, 100.38, 92.46, 81.69, 69.13, 28.18, 21.89, 21.85, 14.37; HRMS (ESI)  $m/z$  calcd for  $\text{C}_{13}\text{H}_{20}\text{O}_4$   $[\text{M}+\text{Na}]^+ = 263.1259$ , found = 263.1259.

**1-benzyl 5-(tert-butyl) 2-methylpenta-2,3-dienedioate (2u)**

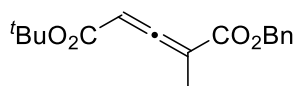

$^1\text{H}$  NMR (400 MHz,  $\text{CDCl}_3$ )  $\delta$  7.38-7.29 (m, 5H), 5.82 (q,  $J = 2.9$  Hz, 1H), 5.22 (dd,  $J = 12.7, 19.3$  Hz, 2H), 1.98 (d,  $J = 3.0$  Hz, 3H), 1.47 (s, 9H);  $^{13}\text{C}$  NMR (100 MHz,  $\text{CDCl}_3$ )  $\delta$  218.36, 165.70, 163.38, 136.00, 128.63, 128.23, 127.76, 99.87, 92.78, 81.88, 66.93, 28.16, 14.37; HRMS (ESI)  $m/z$  calcd for  $\text{C}_{17}\text{H}_{20}\text{O}_4$   $[\text{M}+\text{Na}]^+ = 311.1259$ , found = 311.1252.

**1-ethyl 5-phenyl 2-methylpenta-2,3-dienedioate (2x)**

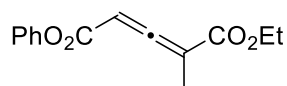

$^1\text{H}$  NMR (400 MHz,  $\text{CDCl}_3$ )  $\delta$  7.38 (t,  $J = 7.9$  Hz, 2H), 7.23 (t,  $J = 7.5$  Hz, 1H), 7.14 (d,  $J = 7.6$  Hz, 2H), 6.08 (q,  $J = 3.0$  Hz, 1H), 4.26 (qd,  $J = 7.1, 1.3$  Hz, 2H), 2.03 (d,  $J = 2.9$  Hz, 3H), 1.31 (t,  $J = 7.1$  Hz, 3H);  $^{13}\text{C}$  NMR (100 MHz,  $\text{CDCl}_3$ )  $\delta$  219.19, 165.21, 162.63, 150.57, 129.42, 126.01, 121.46, 100.77, 90.49, 61.77, 14.32, 14.20; HRMS (APCI $^+$ ): calcd for  $\text{C}_{14}\text{H}_{24}\text{O}_4$   $[\text{M}+\text{H}]^+ = 247.0970$ , found = 247.0978.

## 5. General procedure for the asymmetric [2 + 2] cycloaddition.

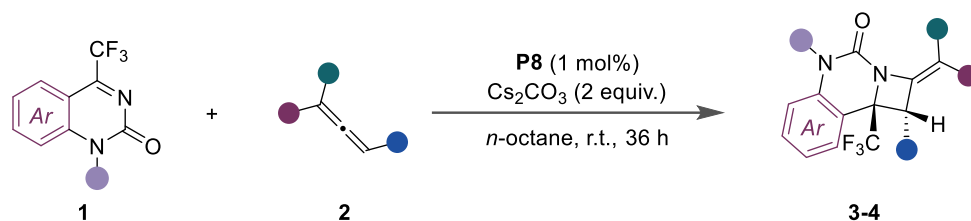

**Representative procedure for the fused azetidines 3a:** To a round bottle flask with a magnetic stirring bar were added **1a** (36.8 mg, 0.1 mmol) and Cs<sub>2</sub>CO<sub>3</sub> (65.2 mg, 0.2 mmol) and catalyst **P8** (1.0 mg, 0.001 mmol), followed by the addition of **2a** (24.9 mg, 0.11 mmol) in *n*-octane (1 mL). The reaction mixture was stirred at rt for 72 h, and TLC show that the reaction was completed. Then, the residue was purified by column chromatography on silica gel (PE/EtOAc = 20:1-10:1) to afford the corresponding products **3a** (57 mg, 96% yield, 98% ee) as a white solid.

### *tert*-butyl (1*S*,9*bR*,*E*)-8-chloro-2-(1-ethoxy-1-oxopropan-2-ylidene)-5-(4-methoxybenzyl)-4-oxo-9*b*-(trifluoromethyl)-1,4,5,9*b*-tetrahydro-2*H*-azeto[1,2-*c*]quinazoline-1-carboxylate (**3a**)

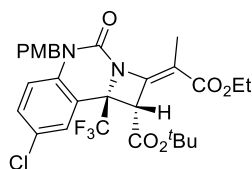

A white solid; 96% yield; m.p. = 153-156 °C; [ $\alpha$ ]<sub>D</sub><sup>25</sup> = -67.5 (c 0.8, CHCl<sub>3</sub>); <sup>1</sup>H NMR (400 MHz, CDCl<sub>3</sub>)  $\delta$  7.17-7.10 (m, 2H), 7.07 (d, *J* = 8.7 Hz, 2H), 6.79-6.74 (m, 2H), 6.72 (d, *J* = 9.4 Hz, 1H), 4.97 (dd, *J* = 53.7, 16.4 Hz, 2H), 4.44 (s, 1H), 4.24-3.99 (m, 2H), 3.70 (s, 3H), 2.26 (s, 3H), 1.22 (t, *J* = 7.1 Hz, 3H), 1.17 (s, 9H); <sup>13</sup>C NMR (100 MHz, CDCl<sub>3</sub>)  $\delta$  167.70, 164.84, 158.95, 148.90, 148.78, 137.65, 130.82, 128.32, 127.56, 127.41, 126.26, 116.94, 116.15, 114.35, 109.47, 83.07,  $\delta$  68.58 (q, *J* = 31.9 Hz) 60.80, 58.87, 55.24, 46.65, 27.62, 14.26, 14.04; <sup>19</sup>F NMR (376 MHz, CDCl<sub>3</sub>)  $\delta$  -81.00; HRMS (ESI<sup>+</sup>): calcd for C<sub>29</sub>H<sub>30</sub>ClF<sub>3</sub>N<sub>2</sub>O<sub>6</sub> [M+H]<sup>+</sup> = 595.1823, found = 595.1823; The ee value was 98%, *t*<sub>R</sub> (major) = 7.2 min, *t*<sub>R</sub> (minor) = 11.1 min (Chiralcel ID,  $\lambda$  = 254 nm, hexane/2-propanol = 90/10, flow rate = 1.0 mL/min).

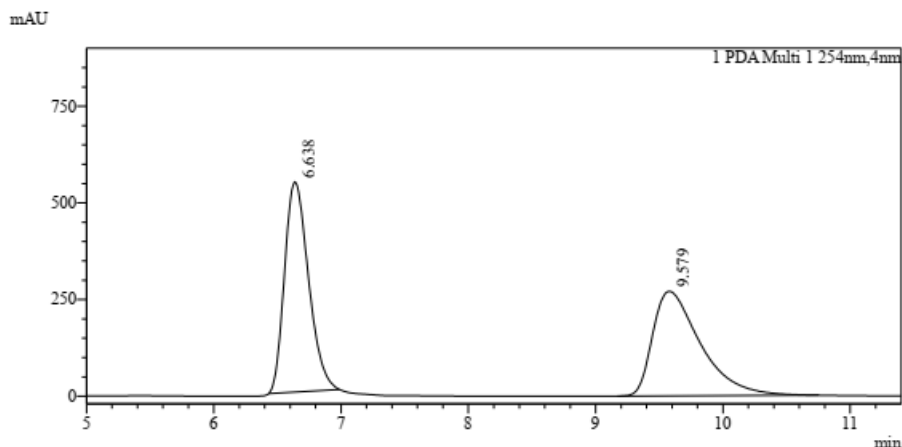

Peak Table

| Peak# | Ret. Time | Height | Height% | Area     | Area%   |
|-------|-----------|--------|---------|----------|---------|
| 1     | 6.638     | 543298 | 66.749  | 7120786  | 50.176  |
| 2     | 9.579     | 270641 | 33.251  | 7070939  | 49.824  |
| Total |           | 813940 | 100.000 | 14191726 | 100.000 |

### Racemic **3a**

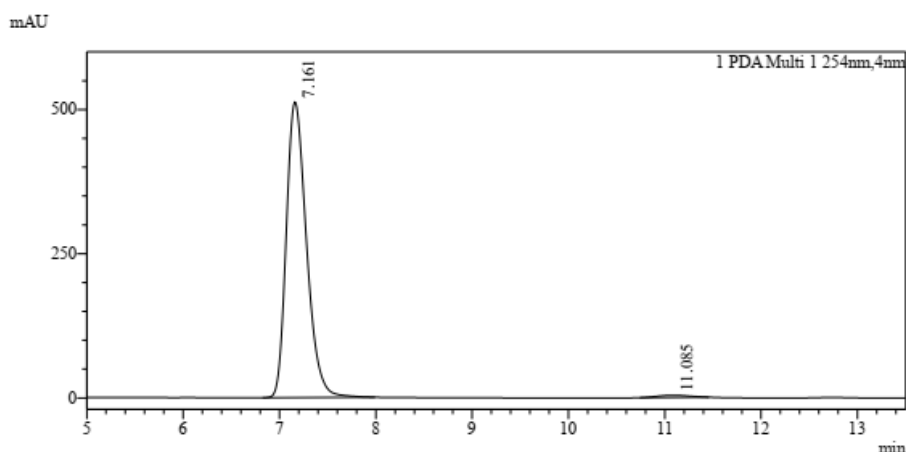

Peak Table

| Peak# | Ret. Time | Height | Height% | Area    | Area%   |
|-------|-----------|--------|---------|---------|---------|
| 1     | 7.161     | 512317 | 99.277  | 7460435 | 98.853  |
| 2     | 11.085    | 3732   | 0.723   | 86569   | 1.147   |
| Total |           | 516049 | 100.000 | 7547004 | 100.000 |

### Enantiomerically enriched **3a**

**tert-butyl (1*S*,9*bR*,*E*)-8-chloro-2-(1-ethoxy-1-oxobutan-2-ylidene)-5-(4-methoxybenzyl)-4-oxo-9*b*-(trifluoromethyl)-1,4,5,9*b*-tetrahydro-2*H*-azeto[1,2-*c*]quinazoline-1-carboxylate (3*b*)**

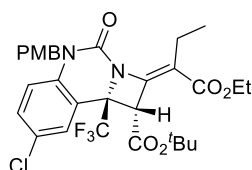

A white solid; 90% yield; m.p. = 136-138 °C;  $[\alpha]_D^{25} = -57.6$  (c 0.8, CHCl<sub>3</sub>); <sup>1</sup>H NMR (400 MHz, CDCl<sub>3</sub>) δ 7.23-7.18 (m, 2H), 7.13 (d, *J* = 8.7 Hz, 2H), 6.85-6.77 (m, 3H), 5.05 (dd, *J* = 21.4, 16.6 Hz, 2H), 4.48 (s, 1H), 4.28-4.10 (m, 2H), 3.01-2.70 (m, 2H), 1.30 (t, *J* = 7.1 Hz, 3H), 1.20 (s, 9H), 1.10 (t, *J* = 7.3 Hz, 3H); <sup>13</sup>C NMR (100 MHz, CDCl<sub>3</sub>) δ 167.41, 164.73, 158.94, 148.88, 148.38, 137.60, 130.81, 128.44, 127.54, 127.44, 126.32, 116.89, 116.32, 115.22, 114.33, 82.77, 68.49 (q, *J* = 43.7 Hz), 60.72, 58.57, 55.29, 46.78, 27.53, 21.43, 15.53, 14.28; <sup>19</sup>F NMR (376 MHz, CDCl<sub>3</sub>) δ -81.02; HRMS (ESI<sup>+</sup>): calcd for C<sub>30</sub>H<sub>32</sub>ClF<sub>3</sub>N<sub>2</sub>O<sub>6</sub> [M+Na]<sup>+</sup> = 631.1799, found = 631.1802; The ee value was 96%, *t*<sub>R</sub> (major) = 12.1 min, *t*<sub>R</sub> (minor) = 16.2 min (Chiralcel ID, λ = 254 nm, hexane/2-propanol = 90/10, flow rate = 1.0 mL/min).

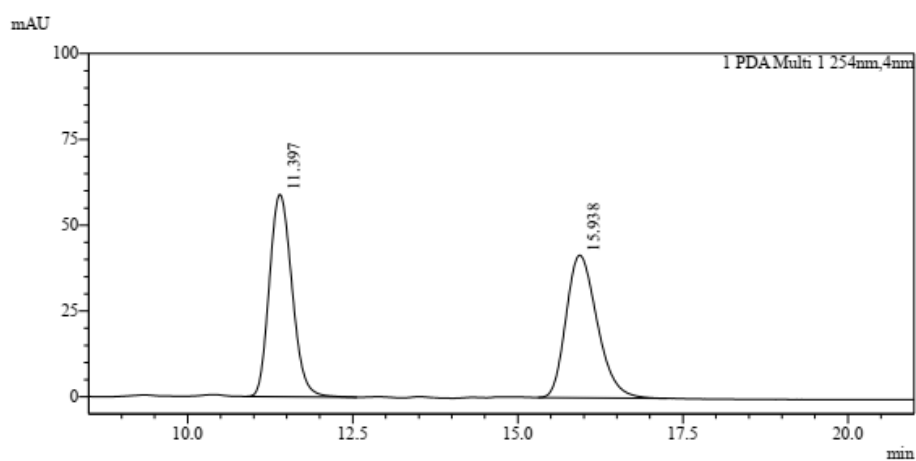

Peak Table

| Peak# | Ret. Time | Height | Height% | Area    | Area%   |
|-------|-----------|--------|---------|---------|---------|
| 1     | 11.397    | 58889  | 58.651  | 1406232 | 50.725  |
| 2     | 15.938    | 41517  | 41.349  | 1366053 | 49.275  |
| Total |           | 100406 | 100.000 | 2772285 | 100.000 |

Racemic **3b**

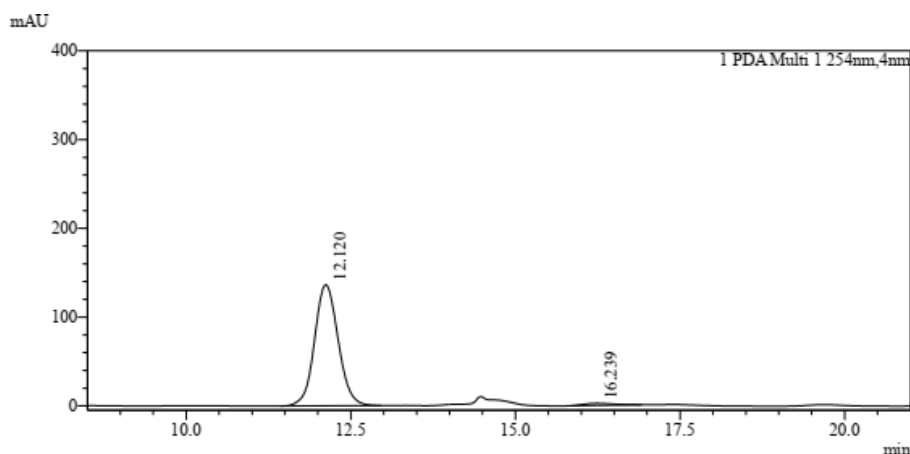

Peak Table

| Peak# | Ret. Time | Height | Height% | Area    | Area%   |
|-------|-----------|--------|---------|---------|---------|
| 1     | 12.120    | 136424 | 98.309  | 3412155 | 97.792  |
| 2     | 16.239    | 2347   | 1.691   | 77047   | 2.208   |
| Total |           | 138770 | 100.000 | 3489201 | 100.000 |

Enantiomerically enriched **3b**

**tert-butyl (1*S*,9*bR*,*E*)-8-chloro-2-(1-ethoxy-3-methyl-1-oxobutan-2-ylidene)-5-(4-methoxybenzyl)-4-oxo-9*b*-(trifluoromethyl)-1,4,5,9*b*-tetrahydro-2*H*-azeto[1,2-*c*]quinazoline-1-carboxylate (3c)**

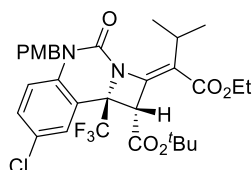

A white solid; 95% yield; m.p. = 129-131 °C;  $[\alpha]_D^{25} = -103.2$  (c 0.8, CHCl<sub>3</sub>); <sup>1</sup>H NMR (400 MHz, CDCl<sub>3</sub>) δ 7.22-7.16 (m, 2H), 7.13 (d, *J* = 8.6 Hz, 2H), 6.83 (d, *J* = 8.7 Hz, 2H), 6.78 (d, *J* = 9.6 Hz, 1H), 5.05 (dd, *J* = 69.3, 16.4 Hz, 2H), 4.50 (s, 1H), 4.29-4.08 (m, 2H), 4.06-3.97 (m, 1H), 3.76 (s, 3H), 1.31 (t, *J* = 7.1 Hz, 3H), 1.26 (d, *J* = 6.9 Hz, 3H), 1.23 (d, *J* = 7.0 Hz, 3H), 1.18 (s, 9H); <sup>13</sup>C NMR (100 MHz, CDCl<sub>3</sub>) δ 166.73, 164.73, 158.96, 148.70, 148.15, 137.57, 130.79, 128.31, 127.56, 127.47, 126.35, 119.88, 116.78, 116.01, 114.33, 82.82, 68.44 (q, *J* = 32.0 Hz), 60.33, 59.35, 55.25, 46.76, 28.40, 27.49, 22.05, 20.80, 14.20; <sup>19</sup>F NMR (376 MHz, CDCl<sub>3</sub>) δ -80.92; HRMS (ESI<sup>+</sup>): calcd for C<sub>31</sub>H<sub>34</sub>ClF<sub>3</sub>N<sub>2</sub>O<sub>6</sub> [M+Na]<sup>+</sup> = 645.1955, found = 645.1956; The ee value was 94%, *t<sub>R</sub>* (major) = 10.6 min, *t<sub>R</sub>* (minor) = 12.3 min (Chiralcel ID, λ = 254 nm, hexane/2-propanol = 90/10, flow rate = 1.0 mL/min).

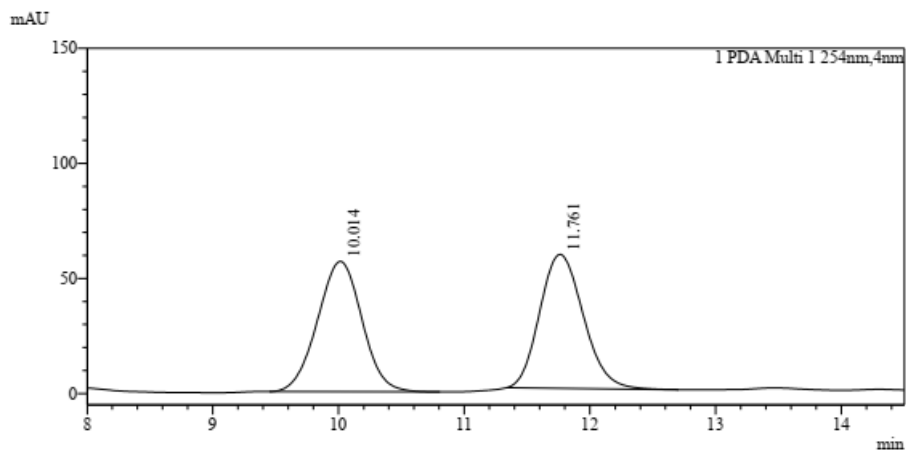

Peak Table

| Peak# | Ret. Time | Height | Height% | Area    | Area%   |
|-------|-----------|--------|---------|---------|---------|
| 1     | 10.014    | 56636  | 49.336  | 1395093 | 49.801  |
| 2     | 11.761    | 58160  | 50.664  | 1406250 | 50.199  |
| Total |           | 114796 | 100.000 | 2801343 | 100.000 |

### Racemic 3c

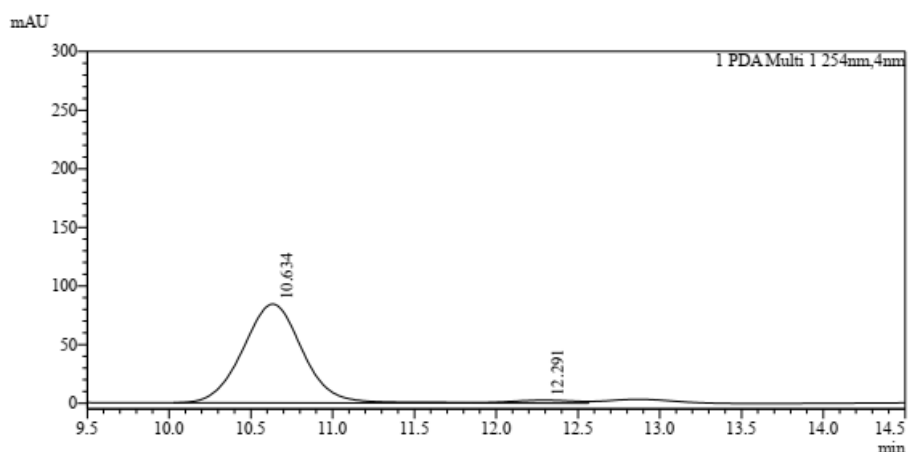

Peak Table

| Peak# | Ret. Time | Height | Height% | Area    | Area%   |
|-------|-----------|--------|---------|---------|---------|
| 1     | 10.634    | 84208  | 97.040  | 2144126 | 96.765  |
| 2     | 12.291    | 2568   | 2.960   | 71683   | 3.235   |
| Total |           | 86776  | 100.000 | 2215809 | 100.000 |

### Enantiomerically enriched 3c

***tert*-butyl (1*S*,9*bR*,*E*)-8-chloro-2-(1-ethoxy-1-oxoheptan-2-ylidene)-5-(4-methoxybenzyl)-4-oxo-9*b*-(trifluoromethyl)-1,4,5,9*b*-tetrahydro-2*H*-azeto[1,2-*c*]quinazoline-1-carboxylate (3*d*)**

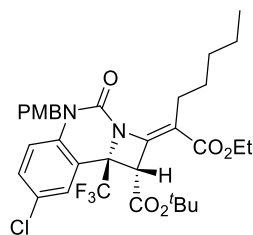

A white solid; 90% yield; m.p. = 138-142 °C;  $[\alpha]_D^{25} = -91.5$  (c 0.8, CHCl<sub>3</sub>); <sup>1</sup>H NMR (400 MHz, CDCl<sub>3</sub>) δ 7.23-7.16 (m, 2H), 7.14 (d, *J* = 8.7 Hz, 2H), 6.86-6.76 (m, 3H), 5.04 (dd, *J* = 16.4, 34.2 Hz, 2H), 4.49 (s, 1H), 4.28-4.09 (m, 2H), 3.77 (s, 3H), 3.01-2.71 (m, 2H), 1.57-1.42 (m, 4H), 1.34-1.27 (m, 7H), 1.19 (s, 9H), 0.87 (t, *J* = 7.0 Hz, 3H); <sup>13</sup>C NMR (100 MHz, CDCl<sub>3</sub>) δ 167.59, 164.76, 158.92, 148.93, 148.26, 137.66, 130.77, 128.42, 127.56, 126.29, 116.93, 116.49, 114.29, 113.77, 82.82, 68.22 (q, *J* = 32.2 Hz), 60.70, 58.40, 55.27, 46.90, 31.39, 30.39, 27.55, 22.65, 14.27, 14.09; <sup>19</sup>F NMR (376 MHz, CDCl<sub>3</sub>) δ -81.06; HRMS (ESI<sup>+</sup>): calcd for C<sub>33</sub>H<sub>38</sub>ClF<sub>3</sub>N<sub>2</sub>O<sub>6</sub> [M+Na]<sup>+</sup> = 673.2268, found = 673.2263; The ee value was 89%, *t*<sub>R</sub> (major) = 5.1 min, *t*<sub>R</sub> (minor) = 8.1 min (Chiralcel ID, λ = 254 nm, hexane/2-propanol = 90/10, flow rate = 1.0 mL/min).

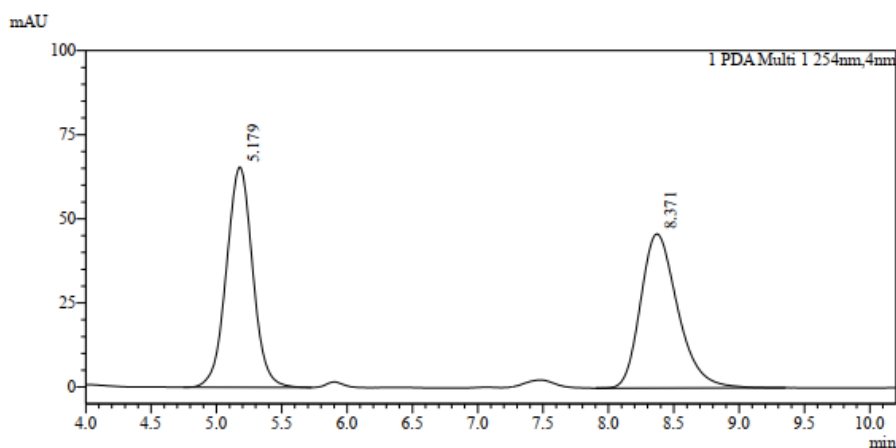

Peak Table

| Peak# | Ret. Time | Height | Height% | Area    | Area%   |
|-------|-----------|--------|---------|---------|---------|
| 1     | 5.179     | 65422  | 58.815  | 914199  | 50.203  |
| 2     | 8.371     | 45810  | 41.185  | 906811  | 49.797  |
| Total |           | 111232 | 100.000 | 1821010 | 100.000 |

Racemic **3d**

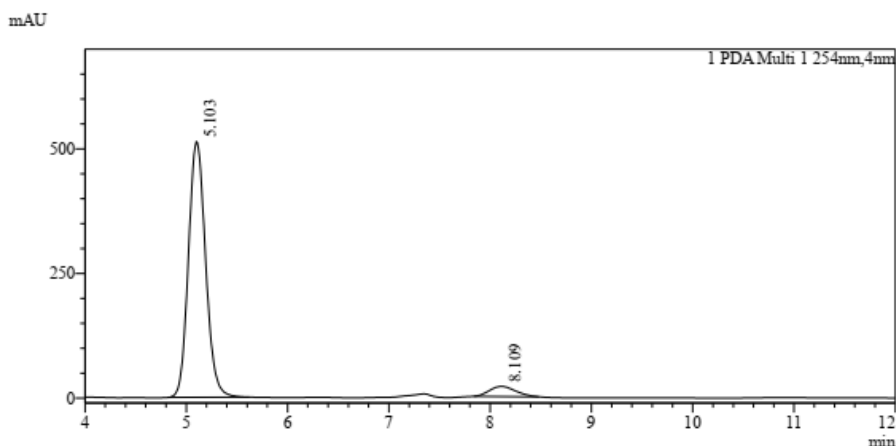

Peak Table

| Peak# | Ret. Time | Height | Height% | Area    | Area%   |
|-------|-----------|--------|---------|---------|---------|
| 1     | 5.103     | 512866 | 96.208  | 6052891 | 94.354  |
| 2     | 8.109     | 20213  | 3.792   | 362192  | 5.646   |
| Total |           | 533079 | 100.000 | 6415083 | 100.000 |

Enantiomerically enriched **3d**

**tert-butyl (1*S*,9*bR*,*E*)-8-chloro-2-(1-ethoxy-1-oxo-3-phenylpropan-2-ylidene)-5-(4-methoxybenzyl)-4-oxo-9*b*-(trifluoromethyl)-1,4,5,9*b*-tetrahydro-2*H*-azeto[1,2-*c*]quinazoline-1-carboxylate (3e)**

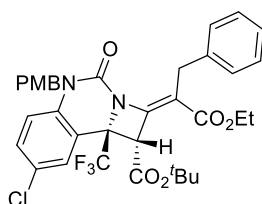

A white solid; 91% yield; m.p. = 138-140 °C;  $[\alpha]_D^{25} = -72.8$  (c 0.8, CHCl<sub>3</sub>); <sup>1</sup>H NMR (400 MHz, CDCl<sub>3</sub>) δ 7.25-7.20 (m, 6H), 7.18-7.12 (m, 1H), 7.09 (d, *J* = 8.6 Hz, 2H), 6.82 (t, *J* = 8.4 Hz, 3H), 5.01 (dd, *J* = 76.2, 16.3 Hz, 2H), 4.59 (s, 1H), 4.47 (d, *J* = 14.9 Hz, 1H), 4.20-4.02 (m, 3H), 3.78 (s, 3H), 1.21 (s, 9H), 1.17 (t, *J* = 7.1 Hz, 3H); <sup>13</sup>C NMR (100 MHz, CDCl<sub>3</sub>) δ 166.13, 163.48, 157.87, 148.91, 147.12, 140.10, 136.54, 129.85, 127.61, 127.45, 126.93, 126.57, 126.40, 125.31, 124.63, 115.99, 115.46, 113.25, 110.28, 82.14, 67.28 (q, *J* = 49.20 Hz), 59.78, 57.27, 54.24, 46.05, 32.23, 26.39, 12.87; <sup>19</sup>F NMR (376 MHz, CDCl<sub>3</sub>) δ -81.06; HRMS (ESI<sup>+</sup>): calcd for C<sub>35</sub>H<sub>33</sub>Cl<sub>2</sub>F<sub>3</sub>N<sub>2</sub>O<sub>6</sub> [M+Na]<sup>+</sup> = 693.1955, found = 693.1955; The ee value was 97%, *t<sub>R</sub>* (major) = 12.6 min, *t<sub>R</sub>* (minor) = 23.2 min (Chiralcel ID, λ = 254 nm, hexane/2-propanol = 90/10, flow rate = 1.0 mL/min).



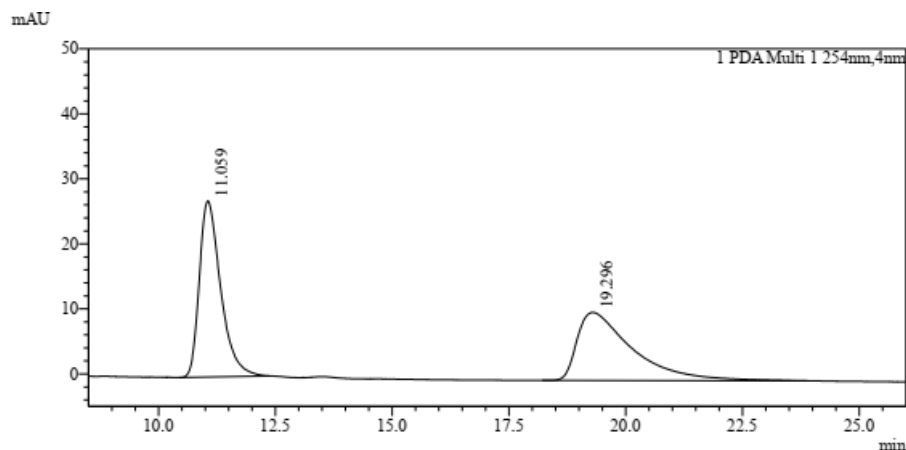

Peak Table

| Peak# | Ret. Time | Height | Height% | Area    | Area%   |
|-------|-----------|--------|---------|---------|---------|
| 1     | 11.059    | 27092  | 72.131  | 862831  | 50.101  |
| 2     | 19.296    | 10468  | 27.869  | 859351  | 49.899  |
| Total |           | 37560  | 100.000 | 1722182 | 100.000 |

### Racemic 3e

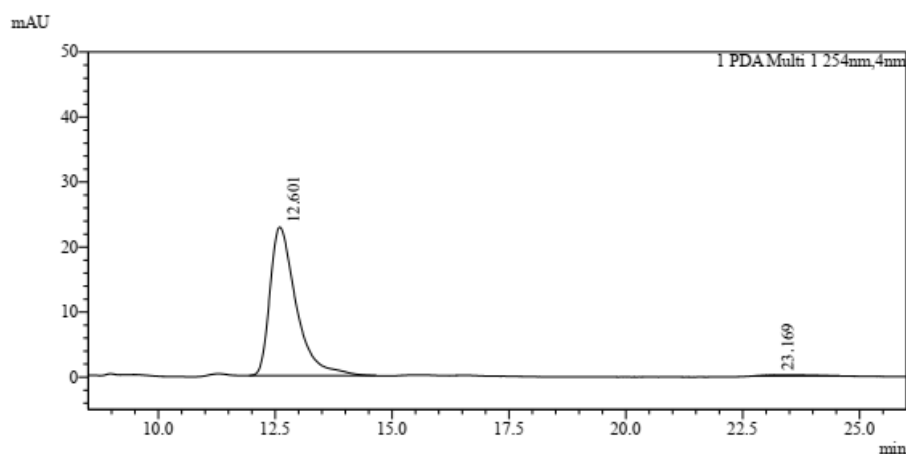

Peak Table

| Peak# | Ret. Time | Height | Height% | Area   | Area%   |
|-------|-----------|--------|---------|--------|---------|
| 1     | 12.601    | 22826  | 99.202  | 893601 | 98.698  |
| 2     | 23.169    | 184    | 0.798   | 11788  | 1.302   |
| Total |           | 23010  | 100.000 | 905389 | 100.000 |

### Enantiomerically enriched 3e

***tert*-butyl (1*S*,9*bR*,*E*)-8-chloro-2-(1-ethoxy-1-oxo-3-(*o*-tolyl)propan-2-ylidene)-5-(4-methoxybenzyl)-4-oxo-9*b*-(trifluoromethyl)-1,4,5,9*b*-tetrahydro-2*H*-azeto[1,2-*c*]quinazoline-1-carboxylate (3*f*)**

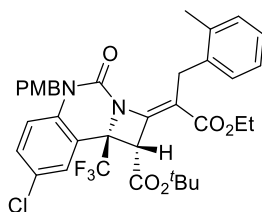

A white solid; 96% yield; m.p. = 148-152 °C;  $[\alpha]_D^{25} = -55.7$  (c 0.8, CHCl<sub>3</sub>); <sup>1</sup>H NMR (400 MHz, CDCl<sub>3</sub>) δ 7.26-7.24 (m, 1H), 7.22 (dd, *J* = 8.8, 2.4 Hz, 1H), 7.15-7.10 (m, 1H), 7.06 (d, *J* = 3.2 Hz, 3H), 7.00 (d, *J* = 8.6 Hz, 2H), 6.83-6.73 (m, 3H), 4.94 (dd, *J* = 16.3, 104.3 Hz, 2H), 4.65 (s, 1H), 4.25 (dd, *J* = 89.7, 15.7 Hz, 2H), 4.24-3.97 (m, 2H), 3.77 (s, 3H), 2.39 (s, 3H), 1.25 (s, 9H), 1.15 (t, *J* = 7.1 Hz, 3H); <sup>13</sup>C NMR (100 MHz, CDCl<sub>3</sub>) δ 167.30, 164.55, 158.88, 150.47, 147.98, 139.68, 137.63, 136.03, 130.89, 129.8, 128.63, 127.59, 127.52, 127.24, 126.36, 125.49, 125.37, 117.04, 116.53, 114.28, 110.68, 83.37, 68.34(q, *J* = 30.3 Hz), 60.83, 58.18, 55.27, 47.09, 30.48, 27.72, 19.83, 14.08; <sup>19</sup>F NMR (376 MHz, CDCl<sub>3</sub>) δ -80.72; HRMS (ESI<sup>+</sup>): calcd for C<sub>36</sub>H<sub>36</sub>ClF<sub>3</sub>N<sub>2</sub>O<sub>6</sub> [M+Na]<sup>+</sup> = 707.2112, found = 707.2111; The ee value was >99.9%, *t*<sub>R</sub> (major) = 8.5 min, *t*<sub>R</sub> (minor) = 12.9 min (Chiralcel ID, λ = 254 nm, hexane/2-propanol = 90/10, flow rate = 1.0 mL/min).

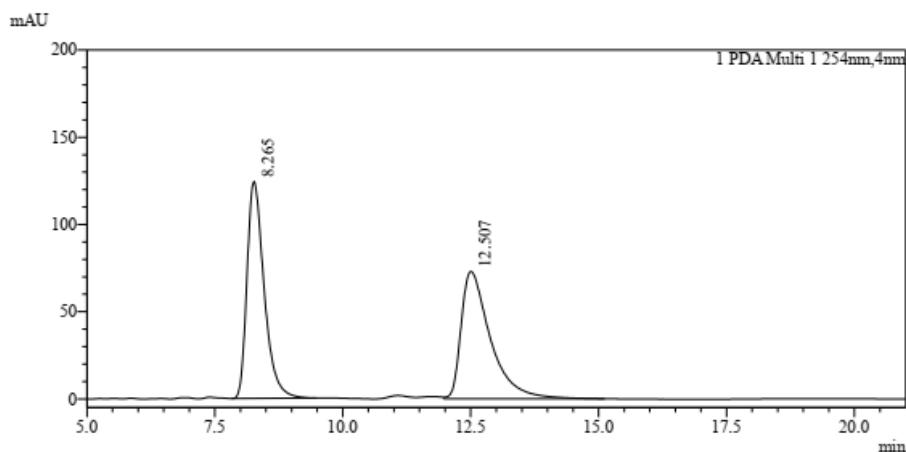

Peak Table

| Peak# | Ret. Time | Height | Height% | Area    | Area%   |
|-------|-----------|--------|---------|---------|---------|
| 1     | 8.265     | 124307 | 62.981  | 2902381 | 49.867  |
| 2     | 12.507    | 73066  | 37.019  | 2917805 | 50.133  |
| Total |           | 197373 | 100.000 | 5820187 | 100.000 |

Racemic **3f**

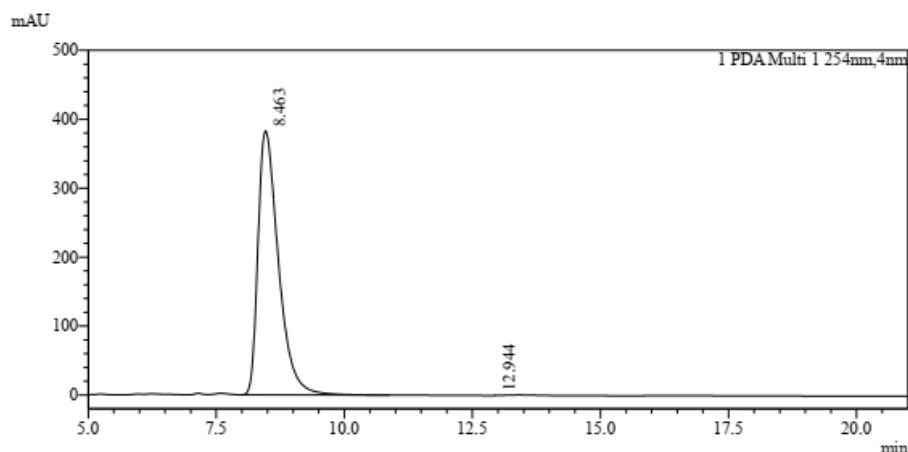

Peak Table

| Peak# | Ret. Time | Height | Height% | Area     | Area%   |
|-------|-----------|--------|---------|----------|---------|
| 1     | 8.463     | 382987 | 100.001 | 10648127 | 100.000 |
| 2     | 12.944    | -5     | -0.001  | 9        | 0.000   |
| Total |           | 382982 | 100.000 | 10648136 | 100.000 |

Enantiomerically enriched **3f**

**tert-butyl (1*S*,9*bR*,*E*)-8-chloro-2-(1-ethoxy-3-(2-fluorophenyl)-1-oxopropan-2-ylidene)-5-(4-methoxybenzyl)-4-oxo-9*b*-(trifluoromethyl)-1,4,5,9*b*-tetrahydro-2*H*-azeto[1,2-*c*]quinazoline-1-carboxylate (3*g*)**

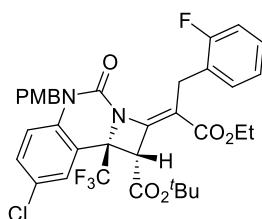

A white solid; 86% yield; m.p. = 99-102 °C;  $[\alpha]_D^{25} = 15.7$  (c 0.8, CHCl<sub>3</sub>); <sup>1</sup>H NMR (400 MHz, CDCl<sub>3</sub>) δ 7.26-7.21 (m, 2H), 7.20-7.10 (m, 2H), 7.07 (d, *J* = 8.7 Hz, 2H), 7.03-6.94 (m, 2H), 6.83 (d, *J* = 8.8 Hz, 1H), 6.80 (d, *J* = 8.7 Hz, 2H), 5.00 (dd, *J* = 66.6, 16.3 Hz, 2H), 4.63 (s, 1H), 4.35 (dd, *J* = 69.4, 15.5 Hz, 2H), 4.17-3.97 (m, 2H), 3.77 (s, 3H), 1.24 (s, 9H), 1.15 (t, *J* = 7.1 Hz, 3H); <sup>13</sup>C NMR (100 MHz, CDCl<sub>3</sub>) δ 167.00, 164.46, 160.88 (d, *J* = 244.2 Hz), 158.95, 150.80, 148.16, 137.65, 130.90, 130.05 (d, *J* = 4.6 Hz), 128.66, 128.18 (d, *J* = 15.2 Hz), 127.64, 127.46, 127.20 (d, *J* = 8.0 Hz), 126.36, 123.42 (d, *J* = 3.5 Hz), 117.09, 116.52, 114.96 (d, *J* = 22.1 Hz), 114.31, 109.76, 83.25, 68.46 (q, *J* = 32.5 Hz), 60.81, 58.23, 55.27, 47.04, 27.67, 26.67, 26.63, 13.98; <sup>19</sup>F NMR (376 MHz, CDCl<sub>3</sub>) δ -80.98, -118.22; HRMS (ESI<sup>+</sup>): calcd for C<sub>35</sub>H<sub>33</sub>ClF<sub>4</sub>N<sub>2</sub>O<sub>6</sub> [M+Na]<sup>+</sup> = 711.1861, found = 711.1858; The ee value was 91%, t<sub>R</sub> (major) = 10.2 min, t<sub>R</sub> (minor) = 14.6 min (Chiralcel ID, λ = 254 nm, hexane/2-propanol = 90/10, flow rate

= 1.0 mL/min).

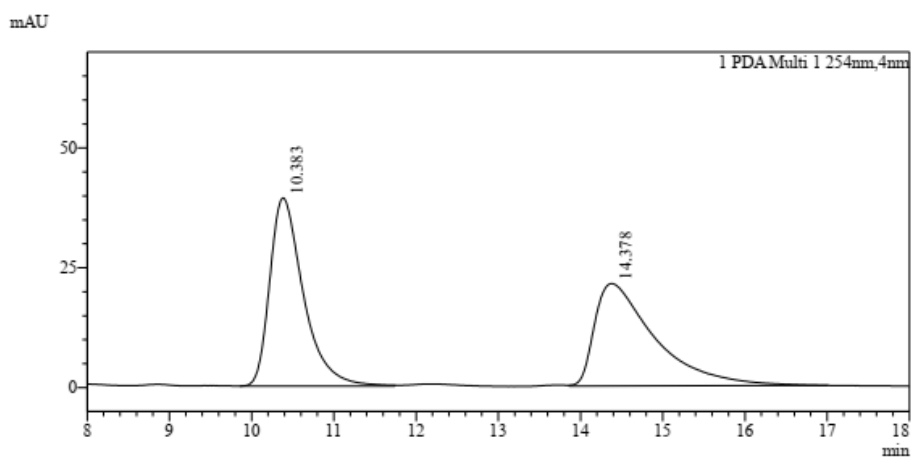

Peak Table

| PDA Ch1 254nm |           |        |         |         |         |  |
|---------------|-----------|--------|---------|---------|---------|--|
| Peak#         | Ret. Time | Height | Height% | Area    | Area%   |  |
| 1             | 10.383    | 39255  | 64.745  | 1119687 | 50.648  |  |
| 2             | 14.378    | 21375  | 35.255  | 1091045 | 49.352  |  |
| Total         |           | 60631  | 100.000 | 2210732 | 100.000 |  |

### Racemic **3g**

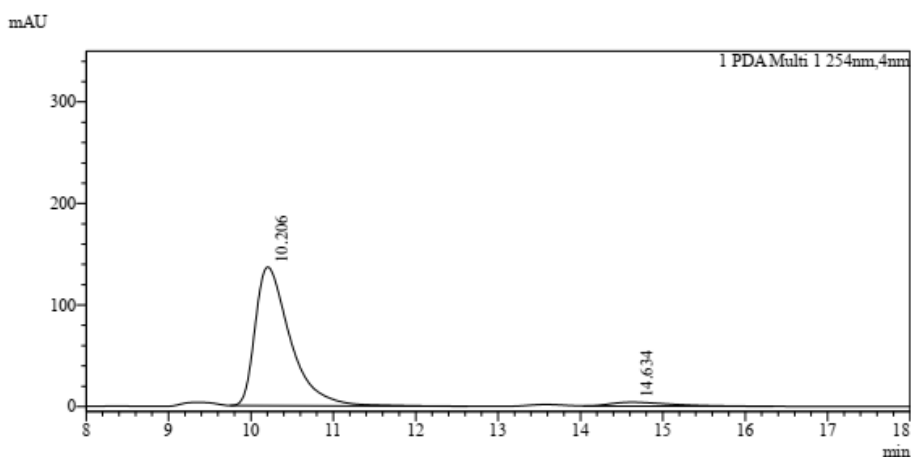

Peak Table

| PDA Ch1 254nm |           |        |         |         |         |  |
|---------------|-----------|--------|---------|---------|---------|--|
| Peak#         | Ret. Time | Height | Height% | Area    | Area%   |  |
| 1             | 10.206    | 136532 | 97.322  | 4043914 | 95.533  |  |
| 2             | 14.634    | 3757   | 2.678   | 189082  | 4.467   |  |
| Total         |           | 140289 | 100.000 | 4232997 | 100.000 |  |

### Enantiomerically enriched **3g**

**tert-butyl (1S,9bR,E)-8-chloro-2-(3-(2-chlorophenyl)-1-ethoxy-1-oxopropan-2-ylidene)-5-(4-methoxybenzyl)-4-oxo-9b-(trifluoromethyl)-1,4,5,9b-tetrahydro-2H-azeto[1,2-c]quinazoline-1-carboxylate (3h)**

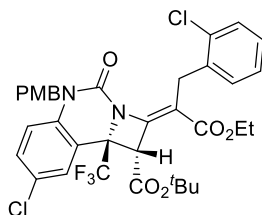

A white solid; 88% yield; m.p. = 110-116 °C;  $[\alpha]_D^{25} = -81.7$  (c 0.8,  $\text{CHCl}_3$ );  $^1\text{H}$  NMR (400 MHz,  $\text{CDCl}_3$ )  $\delta$  7.35-7.31 (m, 1H), 7.25-7.06 (m, 5H), 7.01 (d,  $J = 8.7$  Hz, 2H), 6.81 (d,  $J = 8.9$  Hz, 1H), 6.77 (d,  $J = 8.7$  Hz, 2H), 4.95 (dd,  $J = 63.5, 16.3$  Hz, 2H), 4.66 (s, 1H), 4.41 (dd,  $J = 63.5, 16.2$  Hz, 2H), 4.16-4.00 (m, 2H), 3.77 (s, 3H), 1.27 (s, 9H), 1.13 (t,  $J = 7.1$  Hz, 3H);  $^{13}\text{C}$  NMR (100 MHz,  $\text{CDCl}_3$ )  $\delta$  167.02, 164.46, 158.93, 151.26, 148.00, 139.16, 137.60, 133.86, 130.93, 129.18, 128.95, 128.65, 127.67, 127.44, 126.80, 126.37, 126.16, 117.08, 116.38, 114.28, 109.74, 83.34, 68.52 (q,  $J = 32.1$  Hz), 60.85, 58.27, 55.26, 47.00, 31.19, 27.73, 14.02;  $^{19}\text{F}$  NMR (376 MHz,  $\text{CDCl}_3$ )  $\delta$  -80.95; HRMS ( $\text{ESI}^+$ ): calcd for  $\text{C}_{35}\text{H}_{33}\text{Cl}_2\text{F}_3\text{N}_2\text{O}_6$   $[\text{M}+\text{Na}]^+ = 727.1565$ , found = 727.1568; The ee value was 85%,  $t_R$  (major) = 7.9 min,  $t_R$  (minor) = 13.5 min (Chiralcel ID,  $\lambda = 254$  nm, hexane/2-propanol = 90/10, flow rate = 1.0 mL/min).

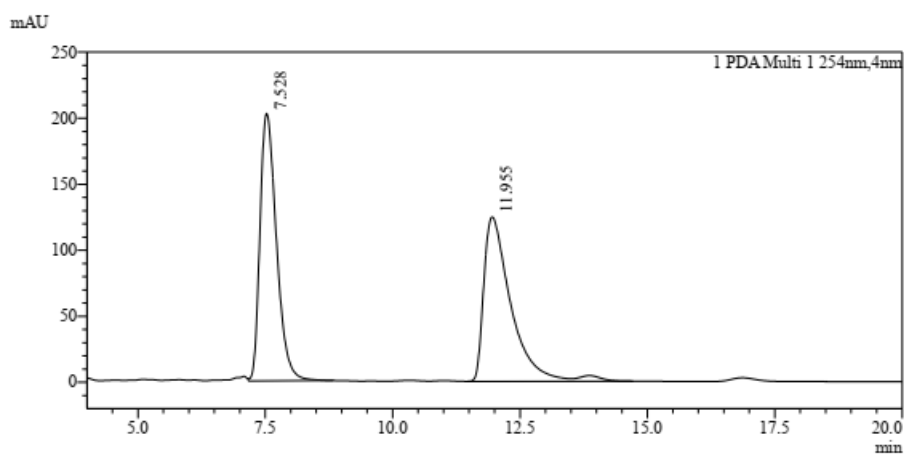

Peak Table

| Peak# | Ret. Time | Height | Height% | Area    | Area%   |
|-------|-----------|--------|---------|---------|---------|
| 1     | 7.528     | 202403 | 61.941  | 4551498 | 49.464  |
| 2     | 11.955    | 124364 | 38.059  | 4650138 | 50.536  |
| Total |           | 326767 | 100.000 | 9201636 | 100.000 |

Racemic **3h**

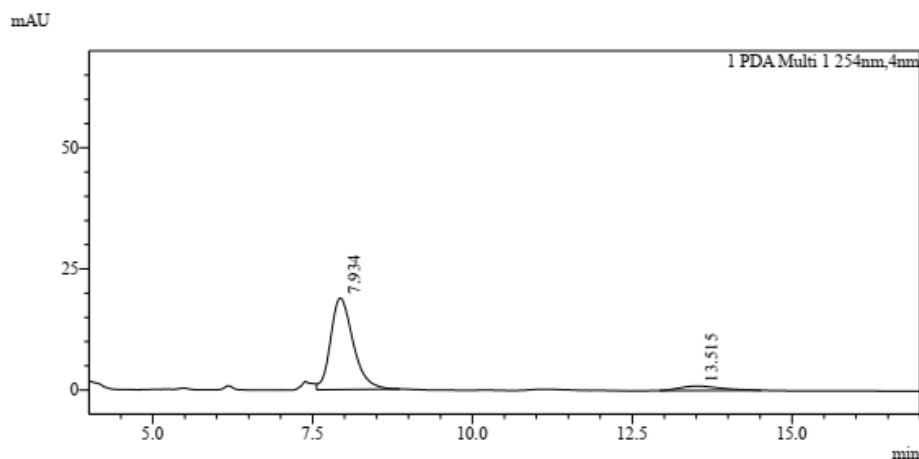

Peak Table

| Peak# | Ret. Time | Height | Height% | Area   | Area%   |
|-------|-----------|--------|---------|--------|---------|
| 1     | 7.934     | 18888  | 95.463  | 465018 | 92.310  |
| 2     | 13.515    | 898    | 4.537   | 38741  | 7.690   |
| Total |           | 19785  | 100.000 | 503758 | 100.000 |

Enantiomerically enriched **3h**

**tert-butyl (1*S*,9*bR*,*E*)-2-(3-(2-bromophenyl)-1-ethoxy-1-oxopropan-2-ylidene)-8-chloro-5-(4-methoxybenzyl)-4-oxo-9*b*-(trifluoromethyl)-1,4,5,9*b*-tetrahydro-2*H*-azeto[1,2-*c*]quinazoline-1-carboxylate (3i)**

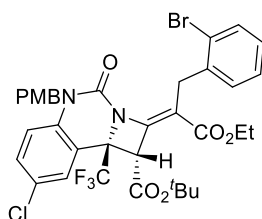

A white solid; 91% yield; m.p. = 100-105 °C;  $[\alpha]_D^{25} = -103.5$  (c 0.8, CHCl<sub>3</sub>); <sup>1</sup>H NMR (400 MHz, CDCl<sub>3</sub>) δ 7.53 (dd, *J* = 7.9, 0.9 Hz, 1H), 7.26-7.12 (m, 4H), 7.07-6.96 (m, 3H), 6.81 (d, *J* = 8.9 Hz, 1H), 6.77 (d, *J* = 8.7 Hz, 2H), 4.95 (dd, *J* = 63.8, 16.4 Hz, 2H), 4.67 (s, 1H), 4.40 (dd, *J* = 86.4, 16.2 Hz, 2H), 4.19-3.98 (m, 2H), 3.77 (s, 3H), 1.27 (s, 9H), 1.14 (t, *J* = 7.1 Hz, 3H); <sup>13</sup>C NMR (100 MHz, CDCl<sub>3</sub>) δ 167.01, 164.44, 158.93, 151.32, 147.97, 140.90, 137.59, 132.50, 130.93, 128.87, 128.65, 127.68, 127.45, 127.08, 126.81, 126.37, 124.55, 117.08, 116.36, 114.27, 109.86, 83.35, 68.65 (q, *J* = 32.3 Hz), 60.86, 58.27, 55.26, 46.99, 34.04, 27.73, 14.05; <sup>19</sup>F NMR (376 MHz, CDCl<sub>3</sub>) δ -80.94; HRMS (ESI<sup>+</sup>): calcd for C<sub>35</sub>H<sub>33</sub>BrClF<sub>3</sub>N<sub>2</sub>O<sub>6</sub> [M+Na]<sup>+</sup> = 771.1060, found =

771.1060; The ee value was 97%,  $t_R$  (major)= 8.6 min,  $t_R$  (minor) = 14.7 min (Chiralcel ID,  $\lambda$  = 254 nm, hexane/2-propanol = 90/10, flow rate = 1.0 mL/min).

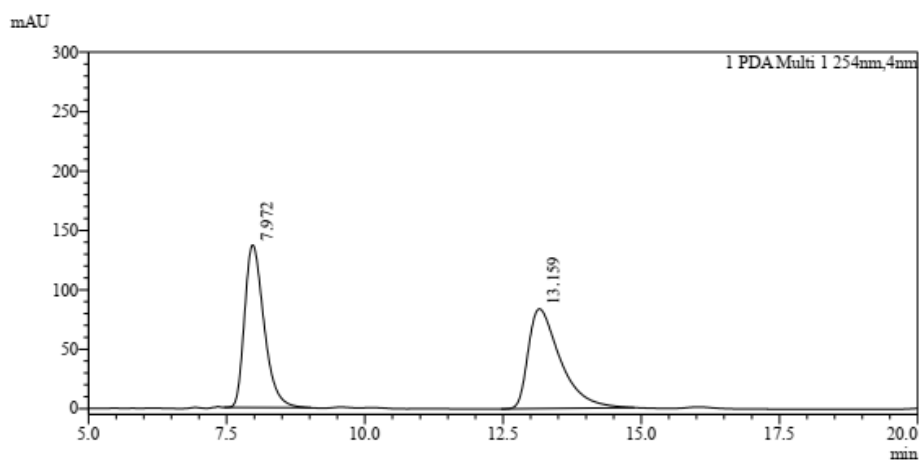

Peak Table

| Peak# | Ret. Time | Height | Height% | Area    | Area%   |
|-------|-----------|--------|---------|---------|---------|
| 1     | 7.972     | 136744 | 61.970  | 3351663 | 49.728  |
| 2     | 13.159    | 83916  | 38.030  | 3388351 | 50.272  |
| Total |           | 220660 | 100.000 | 6740014 | 100.000 |

### Racemic 3i

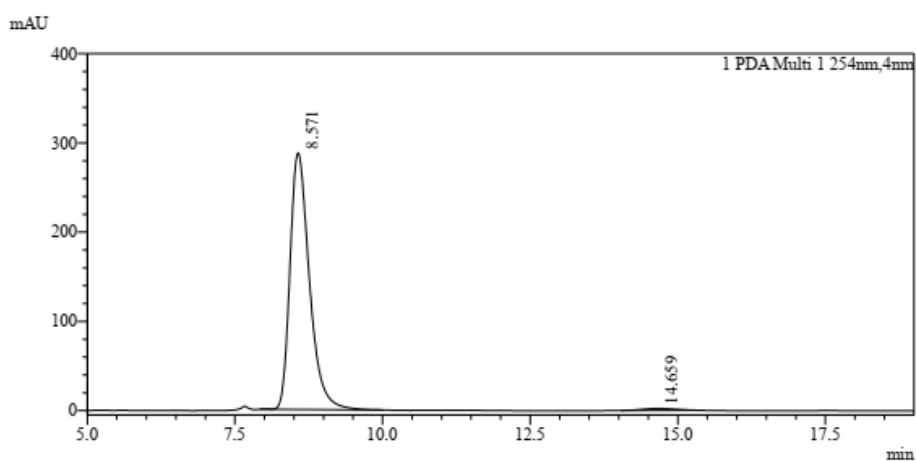

Peak Table

| Peak# | Ret. Time | Height | Height% | Area    | Area%   |
|-------|-----------|--------|---------|---------|---------|
| 1     | 8.571     | 287331 | 99.262  | 6579154 | 98.697  |
| 2     | 14.659    | 2135   | 0.738   | 86828   | 1.303   |
| Total |           | 289467 | 100.000 | 6665982 | 100.000 |

### Enantiomerically enriched 3i

***tert*-butyl (1*S*,9*bR*,*E*)-8-chloro-2-(1-ethoxy-1-oxo-3-(*m*-tolyl)propan-2-ylidene)-5-(4-methoxybenzyl)-4-oxo-9*b*-(trifluoromethyl)-1,4,5,9*b*-tetrahydro-2*H*-azeto[1,2-*c*]quinazoline-1-carboxylate (3j)**

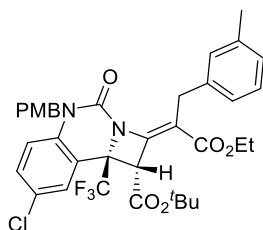

A white solid; 93% yield; m.p. = 118-122 °C;  $[\alpha]_D^{25} = -57.3$  (c 0.8, CHCl<sub>3</sub>); <sup>1</sup>H NMR (400 MHz, CDCl<sub>3</sub>) δ 7.26-7.20 (m, 2H), 7.16-7.06 (m, 4H), 7.04 (d, *J* = 7.6 Hz, 1H), 6.97 (d, *J* = 7.4 Hz, 1H), 6.87-6.78 (m, 3H), 5.02 (dd, *J* = 80.0, 16.4 Hz, 2H), 4.59 (s, 1H), 4.29 (dd, *J* = 81.4, 14.8 Hz, 2H), 4.25-3.98 (m, 2H), 3.78 (s, 3H), 2.30 (s, 3H), 1.21 (s, 9H), 1.18 (t, *J* = 7.1 Hz, 3H); <sup>13</sup>C NMR (100 MHz, CDCl<sub>3</sub>) δ 166.13, 163.49, 157.86, 148.74, 147.20, 139.82, 136.56, 136.33, 129.83, 128.35, 127.56, 126.75, 126.56, 126.45, 125.41, 125.28, 124.49, 115.97, 115.37, 113.25, 110.64, 82.05, 67.31 (q, *J* = 32.2 Hz), 59.76, 57.45, 54.21, 46.00, 32.26, 26.57, 20.46, 13.03; <sup>19</sup>F NMR (376 MHz, CDCl<sub>3</sub>) δ -81.07; HRMS (ESI<sup>+</sup>): calcd for C<sub>36</sub>H<sub>36</sub>ClF<sub>3</sub>N<sub>2</sub>O<sub>6</sub> [M+Na]<sup>+</sup> = 707.2112, found = 707.2119; The ee value was >99.9%, *t<sub>R</sub>* (major) = 12.1 min, *t<sub>R</sub>* (minor) = 23.1 min (Chiralcel ID, λ = 254 nm, hexane/2-propanol = 90/10, flow rate = 1.0 mL/min).

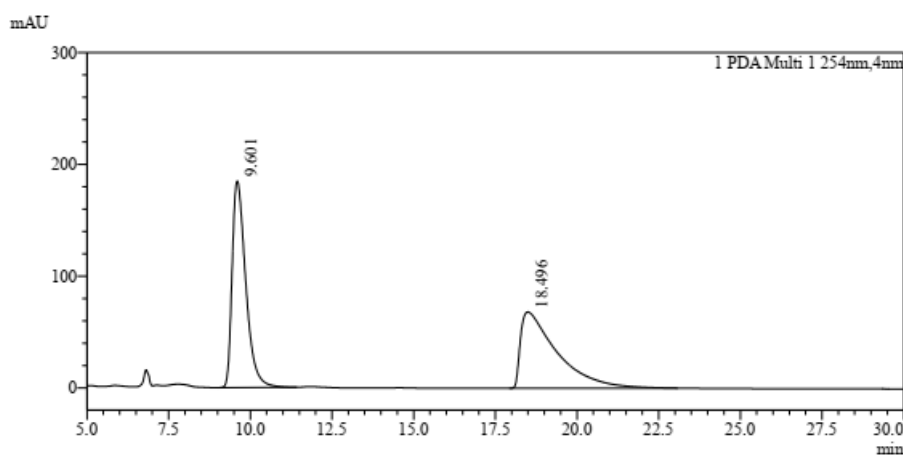

Peak Table

| Peak# | Ret. Time | Height | Height% | Area     | Area%   |
|-------|-----------|--------|---------|----------|---------|
| 1     | 9.601     | 184874 | 73.031  | 5372403  | 50.305  |
| 2     | 18.496    | 68271  | 26.969  | 5307188  | 49.695  |
| Total |           | 253145 | 100.000 | 10679591 | 100.000 |

Racemic **3j**



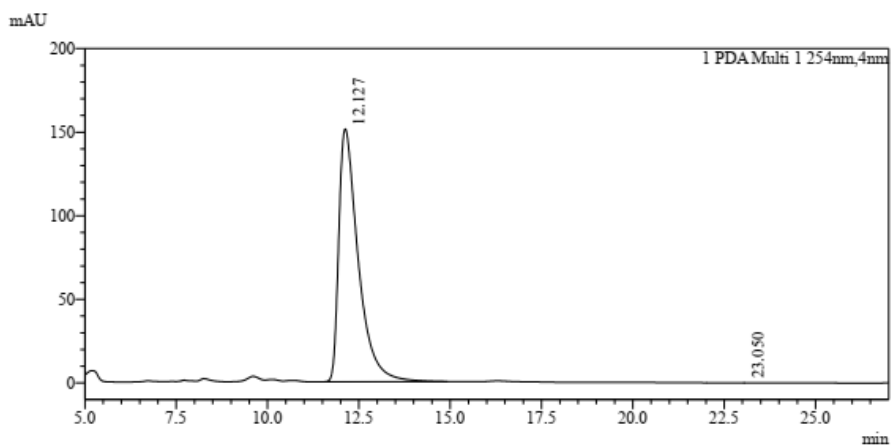

Peak Table

| Peak# | Ret. Time | Height | Height% | Area    | Area%   |
|-------|-----------|--------|---------|---------|---------|
| 1     | 12.127    | 151255 | 99.997  | 5599489 | 100.000 |
| 2     | 23.050    | 4      | 0.003   | 0       | 0.000   |
| Total |           | 151259 | 100.000 | 5599489 | 100.000 |

Enantiomerically enriched **3j**

**tert-butyl (1*S*,9*bR*,*E*)-8-chloro-2-(3-(3-chlorophenyl)-1-ethoxy-1-oxopropan-2-ylidene)-5-(4-methoxybenzyl)-4-oxo-9*b*-(trifluoromethyl)-1,4,5,9*b*-tetrahydro-2*H*-azeto[1,2-*c*]quinazoline-1-carboxylate (3k)**

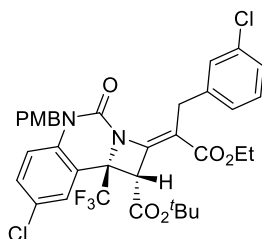

A white solid; 90% yield; m.p. = 138-141 °C;  $[\alpha]_D^{25} = -95.4$  (c 0.8, CHCl<sub>3</sub>); <sup>1</sup>H NMR (400 MHz, CDCl<sub>3</sub>) δ 7.26-7.20 (m, 3H), 7.13 (m, 5H), 6.84 (d, *J* = 8.7 Hz, 3H), 5.02 (dd, *J* = 103.2, 16.4 Hz, 2H), 4.58 (s, 1H), 4.30 (dd, *J* = 175.0, 15.0 Hz, 2H), 4.24-3.99 (m, 2H), 3.78 (s, 3H), 1.21 (s, 9H), 1.17 (t, *J* = 7.1 Hz, 3H); <sup>13</sup>C NMR (100 MHz, CDCl<sub>3</sub>) δ 165.86, 163.29, 157.91, 149.42, 147.20, 142.19, 136.47, 132.75, 129.92, 128.17, 127.72, 127.42, 126.51, 126.28, 125.93, 125.29, 124.88, 116.04, 115.25, 113.35, 109.63, 82.26, 67.35 (q, *J* = 32.1 Hz), 59.92, 57.58, 54.22, 46.13, 32.28, 26.53, 13.03; <sup>19</sup>F NMR (376 MHz, CDCl<sub>3</sub>) δ -81.07; HRMS (ESI<sup>+</sup>): calcd for C<sub>35</sub>H<sub>33</sub>Cl<sub>2</sub>F<sub>3</sub>N<sub>2</sub>O<sub>6</sub> [M+Na]<sup>+</sup> = 727.1565, found = 727.1566; The ee value was 94%, *t<sub>R</sub>* (major) = 9.7 min, *t<sub>R</sub>* (minor) = 17.9 min (Chiralcel ID, λ = 254 nm, hexane/2-propanol = 90/10, flow rate = 1.0 mL/min).

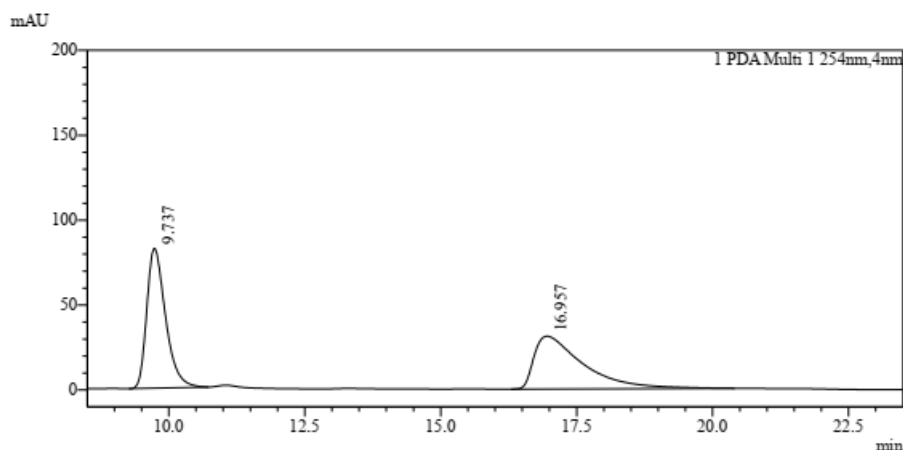

Peak Table

| Peak# | Ret. Time | Height | Height% | Area    | Area%   |
|-------|-----------|--------|---------|---------|---------|
| 1     | 9.737     | 82264  | 72.584  | 1976317 | 50.397  |
| 2     | 16.957    | 31072  | 27.416  | 1945202 | 49.603  |
| Total |           | 113336 | 100.000 | 3921519 | 100.000 |

### Racemic **3k**

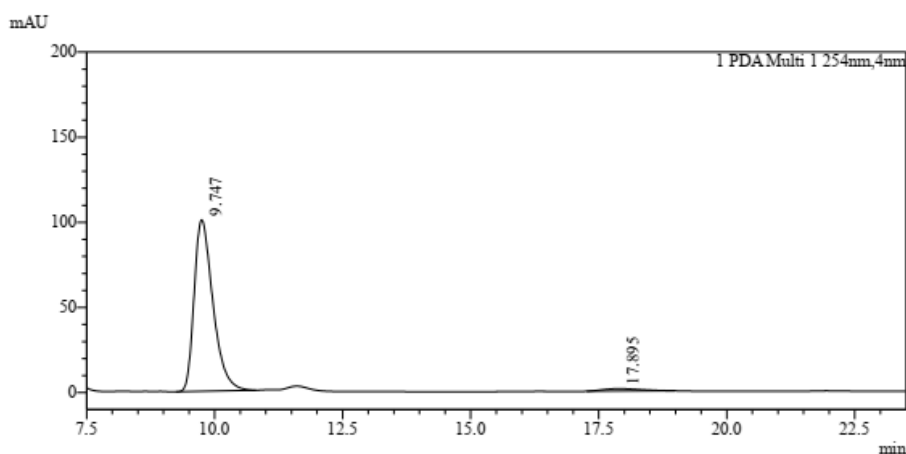

Peak Table

| Peak# | Ret. Time | Height | Height% | Area    | Area%   |
|-------|-----------|--------|---------|---------|---------|
| 1     | 9.747     | 100669 | 98.597  | 2582120 | 97.156  |
| 2     | 17.895    | 1433   | 1.403   | 75584   | 2.844   |
| Total |           | 102102 | 100.000 | 2657704 | 100.000 |

### Enantiomerically enriched **3k**

***tert*-butyl (1*S*,9*bR*,*E*)-2-(3-(3-bromophenyl)-1-ethoxy-1-oxopropan-2-ylidene)-8-chloro-5-(4-methoxybenzyl)-4-oxo-9*b*-(trifluoromethyl)-1,4,5,9*b*-tetrahydro-2*H*-azeto[1,2-*c*]quinazoline-1-carboxylate (3l)**

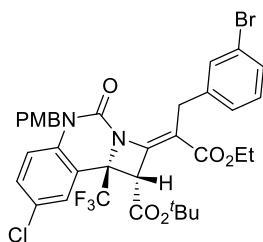

A white solid; 87% yield; m.p. = 138-141 °C;  $[\alpha]_D^{25} = -67.5$  (c 0.8,  $\text{CHCl}_3$ );  $^1\text{H}$  NMR (400 MHz,  $\text{CDCl}_3$ )  $\delta$  7.40 (s, 1H), 7.31-7.16 (m, 3H), 7.14-7.07 (m, 4H), 6.85 (d,  $J = 8.7$  Hz, 3H), 5.02 (dd,  $J = 87.6, 16.4$  Hz, 2H), 4.58 (s, 1H), 4.30 (dd,  $J = 151.5, 15.0$  Hz, 2H), 4.21-3.98 (m, 2H), 3.77 (s, 3H), 1.22 (s, 9H), 1.19 (t,  $J = 7.1$  Hz, 3H);  $^{13}\text{C}$  NMR (100 MHz,  $\text{CDCl}_3$ )  $\delta$  166.89, 164.33, 159.00, 150.46, 148.29, 143.53, 137.57, 131.46, 130.97, 129.54, 128.86, 128.76, 127.60, 127.43, 127.37, 126.35, 122.20, 117.09, 116.33, 114.44, 110.77, 83.31, 68.46 (q,  $J = 32.5$  Hz), 60.95, 58.58, 55.28, 47.16, 33.29, 27.68, 14.09; HRMS (ESI<sup>+</sup>): calcd for  $\text{C}_{35}\text{H}_{33}\text{BrClF}_3\text{N}_2\text{O}_6$   $[\text{M}+\text{Na}]^+ = 771.1060$ , found = 771.1061; The ee value was 88%,  $t_R$  (major) = 10.8 min,  $t_R$  (minor) = 21.4 min (Chiralcel ID,  $\lambda = 254$  nm, hexane/2-propanol = 90/10, flow rate = 1.0 mL/min).

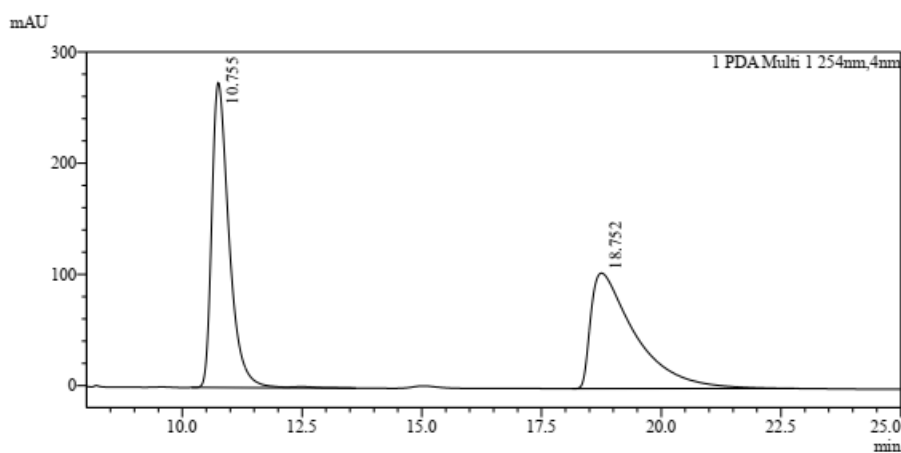

Peak Table

| Peak# | Ret. Time | Height | Height% | Area     | Area%   |
|-------|-----------|--------|---------|----------|---------|
| 1     | 10.755    | 274407 | 72.506  | 6893971  | 50.616  |
| 2     | 18.752    | 104055 | 27.494  | 6726246  | 49.384  |
| Total |           | 378462 | 100.000 | 13620217 | 100.000 |

Racemic **31**

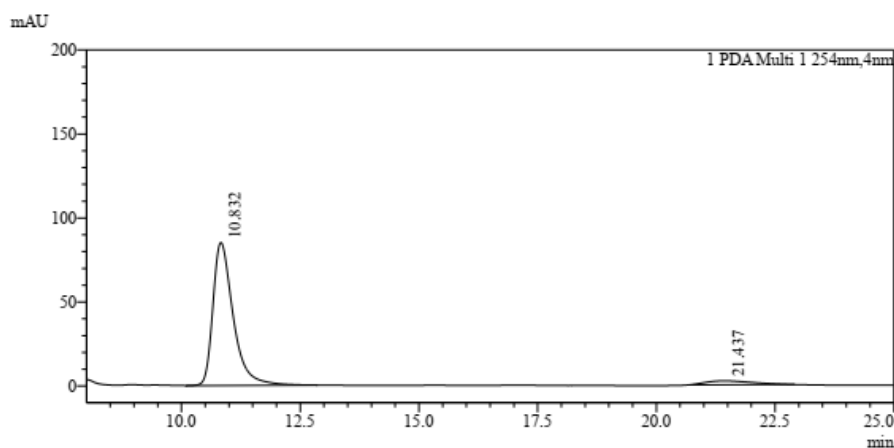

Peak Table

| Peak# | Ret. Time | Height | Height% | Area    | Area%   |
|-------|-----------|--------|---------|---------|---------|
| 1     | 10.832    | 85066  | 97.304  | 2529357 | 93.967  |
| 2     | 21.437    | 2357   | 2.696   | 162389  | 6.033   |
| Total |           | 87422  | 100.000 | 2691746 | 100.000 |

Enantiomerically enriched **3l**

**tert-butyl (1*S*,9*bR*,*E*)-8-chloro-2-(1-ethoxy-1-oxo-3-(*p*-tolyl)propan-2-ylidene)-5-(4-methoxybenzyl)-4-oxo-9*b*-(trifluoromethyl)-1,4,5,9*b*-tetrahydro-2*H*-azeto[1,2-*c*]quinazoline-1-carboxylate (3*m*)**

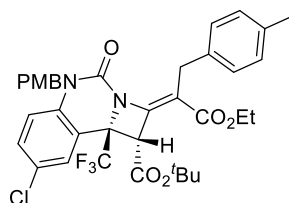

A white solid; 90% yield; m.p. = 119-122 °C;  $[\alpha]_D^{25} = -77.6$  (c 0.8, CHCl<sub>3</sub>); <sup>1</sup>H NMR (400 MHz, CDCl<sub>3</sub>) δ 7.25-7.20 (m, 2H), 7.16-7.01 (m, 6H), 6.82 (t, *J* = 8.0 Hz, 3H), 5.01 (dd, *J* = 73.3, 16.6 Hz, 2H), 4.59 (s, 1H), 4.42 (dd, *J* = 116.9, 14.9 Hz, 2H), 4.22-3.96 (m, 2H), 3.78 (s, 3H), 2.30 (s, 3H), 1.21 (s, 9H), 1.19 (t, *J* = 7.2 Hz, 3H); <sup>13</sup>C NMR (100 MHz, CDCl<sub>3</sub>) δ 166.14, 163.51, 157.86, 148.76, 147.09, 136.96, 136.55, 133.86, 129.82, 127.65, 127.56, 127.30, 126.59, 126.43, 125.29, 115.97, 115.43, 113.23, 110.49, 82.10, 67.26 (q, *J* = 32.2 Hz), 59.77, 57.32, 54.22, 45.96, 31.87, 26.58, 20.04, 13.05; <sup>19</sup>F NMR (376 MHz, CDCl<sub>3</sub>) δ -80.72; HRMS (ESI<sup>+</sup>): calcd for C<sub>36</sub>H<sub>36</sub>ClF<sub>3</sub>N<sub>2</sub>O<sub>6</sub> [M+Na]<sup>+</sup> = 707.2112, found = 707.2113; The ee value was 94%, *t<sub>R</sub>* (major) = 9.0 min, *t<sub>R</sub>* (minor) = 17.9 min (Chiralcel ID, λ = 254 nm, hexane/2-propanol = 90/10, flow rate = 1.0 mL/min).

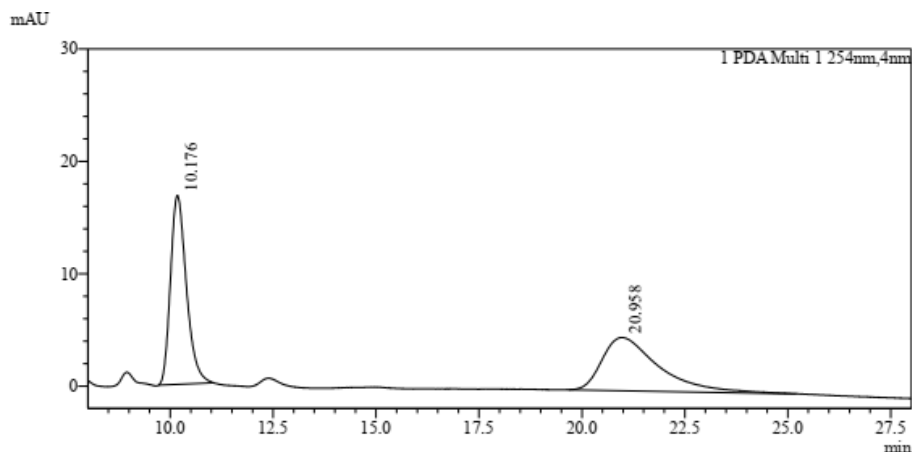

Peak Table

| Peak# | Ret. Time | Height | Height% | Area   | Area%   |
|-------|-----------|--------|---------|--------|---------|
| 1     | 10.176    | 16827  | 78.060  | 452570 | 50.124  |
| 2     | 20.958    | 4730   | 21.940  | 450332 | 49.876  |
| Total |           | 21556  | 100.000 | 902902 | 100.000 |

### Racemic **3m**

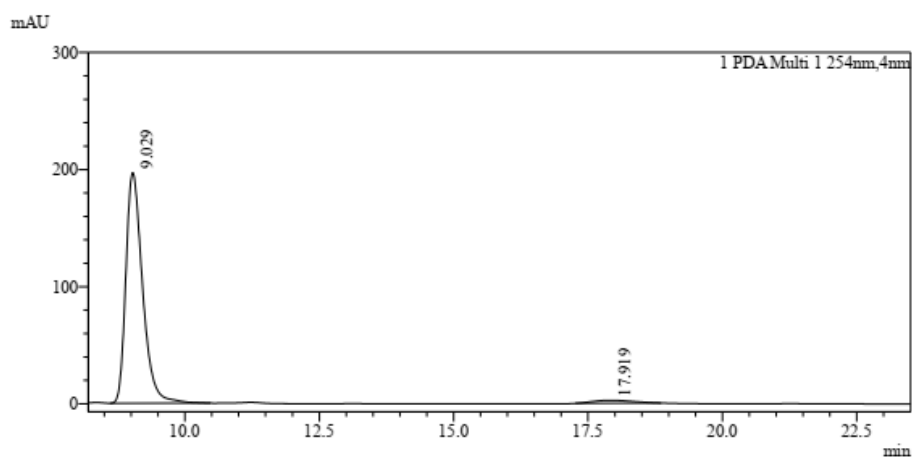

Peak Table

| Peak# | Ret. Time | Height | Height% | Area    | Area%   |
|-------|-----------|--------|---------|---------|---------|
| 1     | 9.029     | 196813 | 98.760  | 4258884 | 97.107  |
| 2     | 17.919    | 2470   | 1.240   | 126875  | 2.893   |
| Total |           | 199283 | 100.000 | 4385759 | 100.000 |

### Enantiomerically enriched **3m**

**tert-butyl (1*S*,9*bR*,*E*)-8-chloro-2-(1-ethoxy-3-(4-fluorophenyl)-1-oxopropan-2-ylidene)-5-(4-methoxybenzyl)-4-oxo-9*b*-(trifluoromethyl)-1,4,5,9*b*-tetrahydro-2*H*-azeto[1,2-*c*]quinazoline-1-carboxylate (**3n**)**

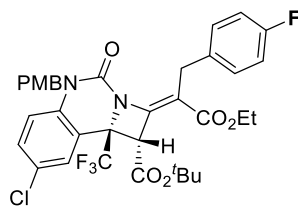

A white solid; 82% yield; m.p. = 103-108 °C;  $[\alpha]_D^{25} = -112.8$  (c 0.8, CHCl<sub>3</sub>); <sup>1</sup>H NMR (400 MHz, CDCl<sub>3</sub>) δ 7.26-7.18 (m, 4H), 7.07 (d, *J* = 8.7 Hz, 2H), 6.95-6.88 (m, 2H), 6.86-6.79 (m, 3H), 5.02 (dd, *J* = 67.3, 16.4 Hz, 2H), 4.59 (s, 1H), 4.27 (dd, *J* = 123.1, 14.9 Hz, 2H), 4.19-4.01 (m, 2H), 3.78 (s, 3H), 1.22 (s, 9H), 1.18 (t, *J* = 7.1 Hz, 3H); <sup>13</sup>C NMR (100 MHz, CDCl<sub>3</sub>) δ 167.05, 164.48, 161.22 (d, *J* = 241.3 Hz), 159.03, 150.09, 148.16, 137.59, 136.80, 136.77, 130.96, 129.91, 129.83, 128.72, 127.57, 127.34, 126.37, 117.10, 116.44, 114.70 (d, *J* = 21.0 Hz), 114.33, 111.23, 83.26, 68.37 (q, *J* = 32.2 Hz), 60.87, 58.29, 55.27, 47.05, 32.55, 27.64, 14.09; <sup>19</sup>F NMR (376 MHz, CDCl<sub>3</sub>) δ -80.98, -118.22; HRMS (ESI<sup>+</sup>): calcd for C<sub>35</sub>H<sub>33</sub>ClF<sub>4</sub>N<sub>2</sub>O<sub>6</sub> [M+Na]<sup>+</sup> = 711.1861, found = 711.1868; The ee value was 84%, *t<sub>R</sub>* (major) = 8.9 min, *t<sub>R</sub>* (minor) = 15.7 min (Chiralcel ID, λ = 254 nm, hexane/2-propanol = 90/10, flow rate = 1.0 mL/min).

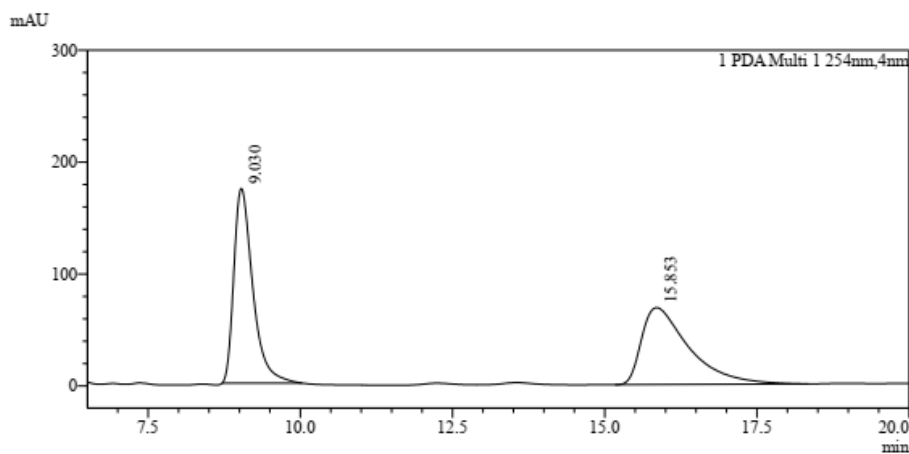

Peak Table

| Peak# | Ret. Time | Height | Height% | Area    | Area%   |
|-------|-----------|--------|---------|---------|---------|
| 1     | 9.030     | 173925 | 71.668  | 3772649 | 50.343  |
| 2     | 15.853    | 68755  | 28.332  | 3721210 | 49.657  |
| Total |           | 242680 | 100.000 | 7493859 | 100.000 |

Racemic **3n**

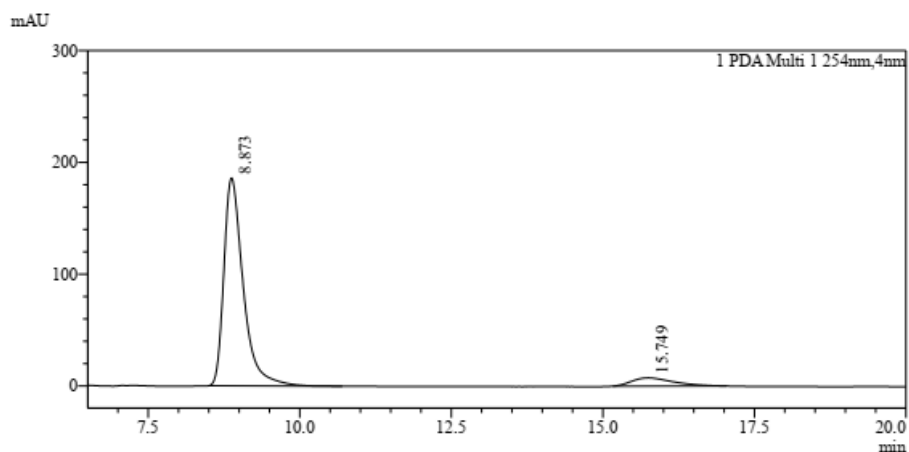

Peak Table

| Peak# | Ret. Time | Height | Height% | Area    | Area%   |
|-------|-----------|--------|---------|---------|---------|
| 1     | 8.873     | 185986 | 96.183  | 4143842 | 92.154  |
| 2     | 15.749    | 7381   | 3.817   | 352831  | 7.846   |
| Total |           | 193367 | 100.000 | 4496673 | 100.000 |

Enantiomerically enriched **3n**

**tert-butyl (1*S*,9*bR*,*E*)-8-chloro-2-(3-(4-chlorophenyl)-1-ethoxy-1-oxopropan-2-ylidene)-5-(4-methoxybenzyl)-4-oxo-9*b*-(trifluoromethyl)-1,4,5,9*b*-tetrahydro-2*H*-azeto[1,2-*c*]quinazoline-1-carboxylate (3o)**

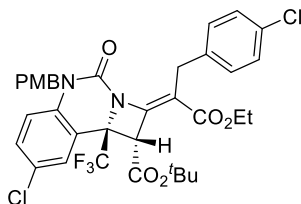

A white solid; 93% yield; m.p. = 125-130 °C;  $[\alpha]_D^{25} = -21.5$  (c 0.8, CHCl<sub>3</sub>); <sup>1</sup>H NMR (400 MHz, CDCl<sub>3</sub>) δ 7.25 (s, 1H), 7.25-7.15 (m, 5H), 7.05 (d, *J* = 8.7 Hz, 2H), 6.83 (t, *J* = 9.3 Hz, 3H), 5.00 (dd, *J* = 85.9, 16.4 Hz, 2H), 4.60 (s, 1H), 4.28 (dd, *J* = 146.9, 15.1 Hz, 2H), 4.20-4.01 (m, 2H), 3.79 (s, 3H), 1.23 (s, 9H), 1.18 (t, *J* = 7.1 Hz, 3H); <sup>13</sup>C NMR (100 MHz, CDCl<sub>3</sub>) δ 167.00, 164.44, 159.05, 150.41, 148.07, 139.82, 137.60, 131.39, 131.32, 130.98, 129.80, 128.76, 128.50, 128.11, 127.59, 127.32, 126.36, 117.12, 116.44, 114.36, 110.64, 83.32, 68.36 (q, *J* = 32.2 Hz), 60.92, 58.20, 55.31, 47.12, 32.74, 27.67, 14.10; <sup>19</sup>F NMR (376 MHz, CDCl<sub>3</sub>) δ -80.99; HRMS (ESI<sup>+</sup>): calcd for C<sub>35</sub>H<sub>33</sub>Cl<sub>2</sub>F<sub>3</sub>N<sub>2</sub>O<sub>6</sub> [M+Na]<sup>+</sup> = 727.1565, found = 727.1561; The ee value was 98%,

$t_R$  (major) = 7.3 min,  $t_R$  (minor) = 14.4 min (Chiralcel ID,  $\lambda$  = 254 nm, hexane/2-propanol = 90/10, flow rate = 1.0 mL/min).

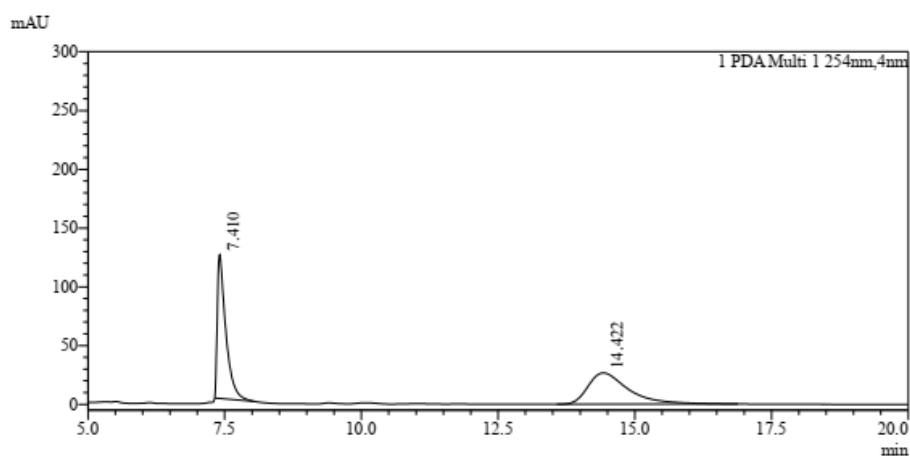

Peak Table

| Peak# | Ret. Time | Height | Height% | Area    | Area%   |
|-------|-----------|--------|---------|---------|---------|
| 1     | 7.410     | 122254 | 82.140  | 1319479 | 49.003  |
| 2     | 14.422    | 26583  | 17.860  | 1373173 | 50.997  |
| Total |           | 148837 | 100.000 | 2692652 | 100.000 |

### Racemic **3o**

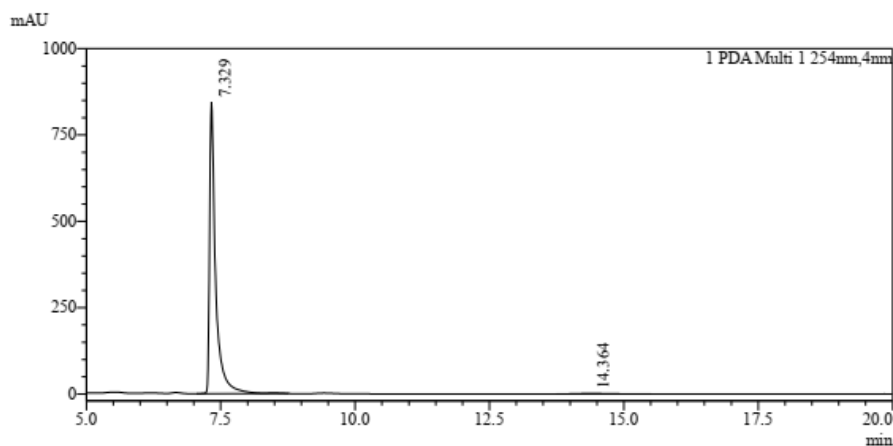

Peak Table

| Peak# | Ret. Time | Height | Height% | Area    | Area%   |
|-------|-----------|--------|---------|---------|---------|
| 1     | 7.329     | 844944 | 99.838  | 6678618 | 99.115  |
| 2     | 14.364    | 1371   | 0.162   | 59667   | 0.885   |
| Total |           | 846315 | 100.000 | 6738285 | 100.000 |

### Enantiomerically enriched **3o**

***tert*-butyl (1*S*,9*bR*,*E*)-2-(3-(4-(*tert*-butyl)phenyl)-1-ethoxy-1-oxopropan-2-ylidene)-8-chloro-5-(4-methoxybenzyl)-4-oxo-9*b*-(trifluoromethyl)-1,4,5,9*b*-tetrahydro-2*H*-azeto[1,2-*c*]quinazoline-1-carboxylate (3*p*)**



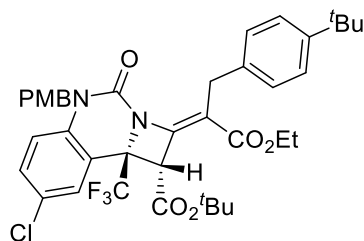

A white solid; 94% yield; m.p. = 108-113 °C;  $[\alpha]_D^{25} = -127.3$  (c 0.8,  $\text{CHCl}_3$ );  $^1\text{H NMR}$  (400 MHz,  $\text{CDCl}_3$ )  $\delta$  7.26-7.10 (m, 8H), 6.88-6.79 (m, 3H), 5.04 (dd,  $J = 63.1, 16.4$  Hz, 2H), 4.59 (s, 1H), 4.29 (dd,  $J = 75.8, 14.4$  Hz, 2H), 4.24-3.98 (m, 2H), 3.77 (s, 3H), 1.29 (s, 9H), 1.21 (s, 9H), 1.18 (t,  $J = 7.2$  Hz, 3H);  $^{13}\text{C NMR}$  (100 MHz,  $\text{CDCl}_3$ )  $\delta$  167.25, 164.60, 158.99, 149.67, 148.21, 148.18, 137.88, 137.67, 130.89, 128.61, 128.18, 127.67, 127.52, 126.36, 124.87, 117.07, 116.52, 114.33, 111.81, 83.12, 68.33 (d,  $J = 32.2$  Hz), 60.80, 58.39, 55.25, 47.02, 34.30, 32.80, 31.46, 27.63, 14.08;  $^{19}\text{F NMR}$  (376 MHz,  $\text{CDCl}_3$ )  $\delta$  -80.93; HRMS (ESI<sup>+</sup>): calcd for  $\text{C}_{39}\text{H}_{42}\text{ClF}_3\text{N}_2\text{O}_6$   $[\text{M}+\text{Na}]^+ = 749.2581$ , found = 749.2582; The ee value was 98%,  $t_R$  (major) = 6.9 min,  $t_R$  (minor) = 12.0 min (Chiralcel ID,  $\lambda = 254$  nm, hexane/2-propanol = 90/10, flow rate = 1.0 mL/min).

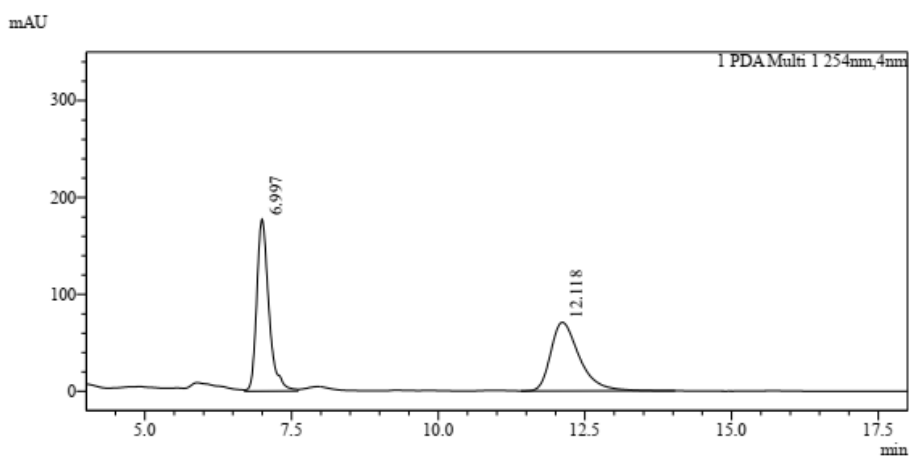

Peak Table

| Peak# | Ret. Time | Height | Height% | Area    | Area%   |
|-------|-----------|--------|---------|---------|---------|
| 1     | 6.997     | 177237 | 71.458  | 2559718 | 51.548  |
| 2     | 12.118    | 70791  | 28.542  | 2405989 | 48.452  |
| Total |           | 248028 | 100.000 | 4965708 | 100.000 |

Racemic **3p**

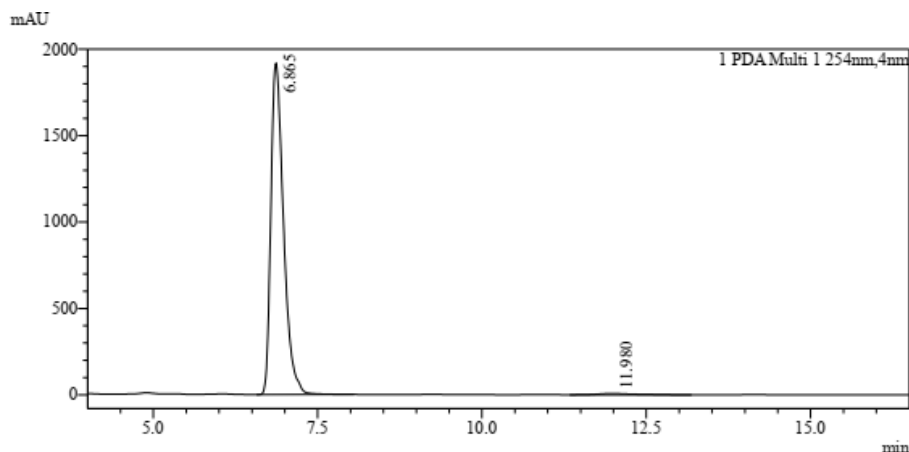

Peak Table

| Peak# | Ret. Time | Height  | Height% | Area     | Area%   |
|-------|-----------|---------|---------|----------|---------|
| 1     | 6.865     | 1916572 | 99.629  | 25752290 | 98.905  |
| 2     | 11.980    | 7143    | 0.371   | 284979   | 1.095   |
| Total |           | 1923715 | 100.000 | 26037269 | 100.000 |

Enantiomerically enriched **3p**

**tert-butyl (1*S*,9*bR*,*E*)-8-chloro-2-(3-(2,4-dichlorophenyl)-1-ethoxy-1-oxopropan-2-ylidene)-5-(4-methoxybenzyl)-4-oxo-9*b*-(trifluoromethyl)-1,4,5,9*b*-tetrahydro-2*H*-azeto[1,2-*c*]quinazoline-1-carboxylate (3*q*)**

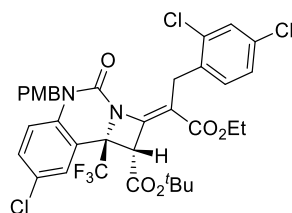

A white solid; 95% yield; m.p. = 115-117 °C;  $[\alpha]_D^{25} = -123.5$  (c 0.8,  $\text{CHCl}_3$ );  $^1\text{H}$  NMR (400 MHz,  $\text{CDCl}_3$ )  $\delta$  7.36 (d,  $J = 1.4$  Hz, 1H), 7.25-7.20 (m, 2H), 7.12-7.09 (m, 2H), 6.97 (d,  $J = 8.6$  Hz, 2H), 6.83-6.75 (m, 3H), 4.93 (dd,  $J = 90.7, 16.3$  Hz, 2H), 4.67 (s, 1H), 4.33 (dd,  $J = 95.5, 16.4$  Hz, 2H), 4.18-4.01 (m, 2H), 3.78 (s, 3H), 1.28 (s, 9H), 1.16 (t,  $J = 7.1$  Hz, 3H);  $^{13}\text{C}$  NMR (100 MHz,  $\text{CDCl}_3$ )  $\delta$  166.85, 164.42, 159.02, 151.67, 147.88, 138.14, 137.58, 134.47, 131.69, 131.02, 129.72, 128.95, 128.74, 127.63, 127.31, 126.50, 126.35, 117.14, 116.31, 114.31, 108.97, 83.50, 68.53 (q,  $J = 33.3$  Hz), 60.98, 58.06, 55.30, 47.13, 30.88, 27.76, 14.06;  $^{19}\text{F}$  NMR (376 MHz,  $\text{CDCl}_3$ )  $\delta$  -80.73; HRMS ( $\text{ESI}^+$ ): calcd for  $\text{C}_{35}\text{H}_{32}\text{Cl}_3\text{F}_3\text{N}_2\text{O}_6$   $[\text{M}+\text{Na}]^+ = 761.1176$ , found = 761.1176; The ee value was 95%,  $t_R$  (major) = 14.3 min,  $t_R$  (minor) = 19.8 min (Chiralcel ID,  $\lambda = 254$  nm, hexane/2-propanol = 90/10, flow rate = 1.0 mL/min).

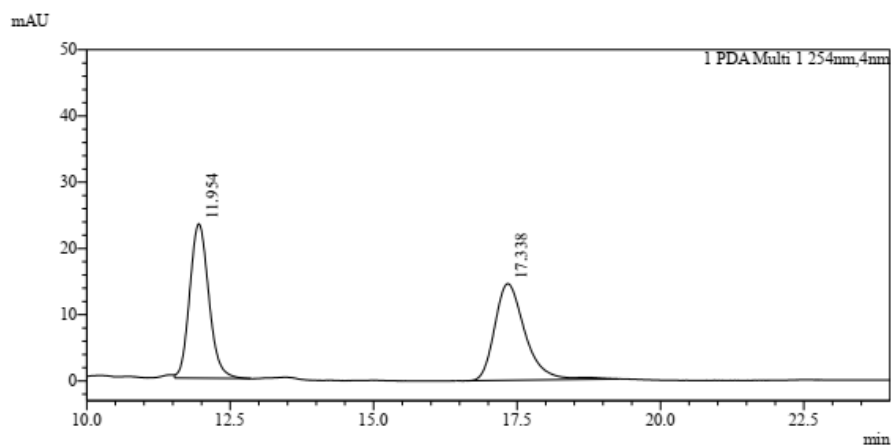

Peak Table

| Peak# | Ret. Time | Height | Height% | Area    | Area%   |
|-------|-----------|--------|---------|---------|---------|
| 1     | 11.954    | 23310  | 61.504  | 540587  | 50.123  |
| 2     | 17.338    | 14590  | 38.496  | 537937  | 49.877  |
| Total |           | 37900  | 100.000 | 1078524 | 100.000 |

### Racemic **3q**

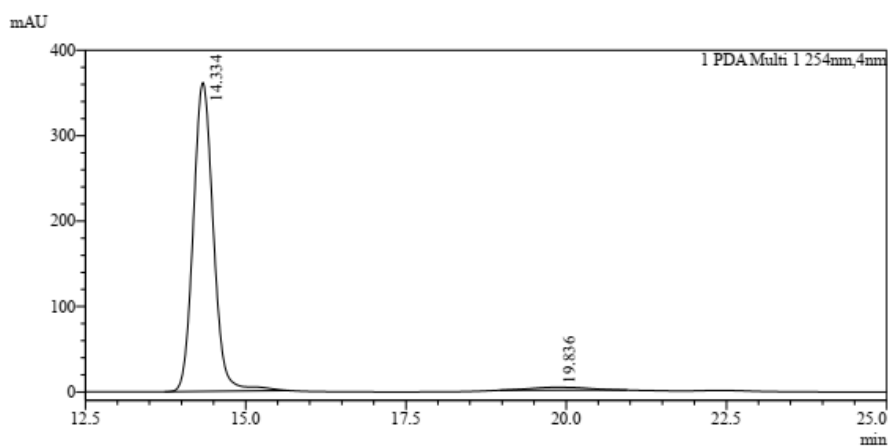

Peak Table

| Peak# | Ret. Time | Height | Height% | Area    | Area%   |
|-------|-----------|--------|---------|---------|---------|
| 1     | 14.334    | 361413 | 99.068  | 7875347 | 97.347  |
| 2     | 19.836    | 3399   | 0.932   | 214632  | 2.653   |
| Total |           | 364811 | 100.000 | 8089978 | 100.000 |

### Enantiomerically enriched **3q**

**tert-butyl (1*S*,9*bR*,*E*)-8-chloro-2-(3-(3,5-dimethoxyphenyl)-1-ethoxy-1-oxopropan-2-ylidene)-5-(4-methoxybenzyl)-4-oxo-9*b*-(trifluoromethyl)-1,4,5,9*b*-tetrahydro-2*H*-azeto[1,2-*c*]quinazoline-1-carboxylate (3*r*)**

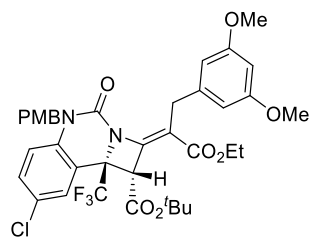

A white solid; 84% yield; m.p. = 113-117 °C;  $[\alpha]_D^{25} = -91.3$  (c 0.8, CHCl<sub>3</sub>); <sup>1</sup>H NMR (400 MHz, CDCl<sub>3</sub>) δ 7.29-7.18 (m, 3H), 7.10 (d, *J* = 8.7 Hz, 2H), 6.86-6.78 (m, 3H), 6.45 (d, *J* = 2.2 Hz, 2H), 6.27 (t, *J* = 2.3 Hz, 1H), 5.01 (dd, *J* = 94.1, 16.3 Hz, 2H), 4.60 (s, 1H), 4.27 (dd, *J* = 50.7, 15.3 Hz, 2H), 4.25-4.00 (m, 2H), 3.77 (s, 3H), 3.73 (s, 6H), 1.24 (s, 9H), 1.19 (t, *J* = 7.1 Hz, 3H); <sup>13</sup>C NMR (100 MHz, CDCl<sub>3</sub>) δ 167.13, 164.61, 160.55, 158.95, 150.11, 148.22, 143.43, 137.65, 130.89, 128.57, 127.60, 127.43, 126.31, 117.04, 116.44, 114.37, 111.28, 106.62, 97.87, 83.35, 68.40 (q, *J* = 28.2 Hz), 60.81, 58.37, 55.24, 55.15, 47.09, 33.50, 27.65, 14.13; HRMS (ESI<sup>+</sup>): calcd for C<sub>37</sub>H<sub>38</sub>ClF<sub>3</sub>N<sub>2</sub>O<sub>8</sub> [M+Na]<sup>+</sup> = 753.2166, found = 753.2160; <sup>19</sup>F NMR (376 MHz, CDCl<sub>3</sub>) δ -80.93; The ee value was 86%, *t<sub>R</sub>* (major) = 10.8 min, *t<sub>R</sub>* (minor) = 19.1 min (Chiralcel IA, λ = 254 nm, hexane/2-propanol = 90/10, flow rate = 1.0 mL/min).

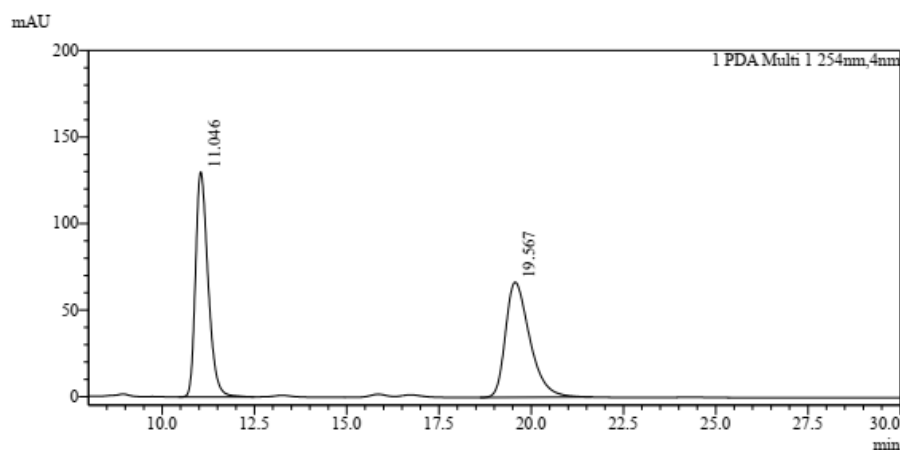

Peak Table

| Peak# | Ret. Time | Height | Height% | Area    | Area%   |
|-------|-----------|--------|---------|---------|---------|
| 1     | 11.046    | 130060 | 66.155  | 3087775 | 50.307  |
| 2     | 19.567    | 66539  | 33.845  | 3050052 | 49.693  |
| Total |           | 196599 | 100.000 | 6137827 | 100.000 |

Racemic **3r**

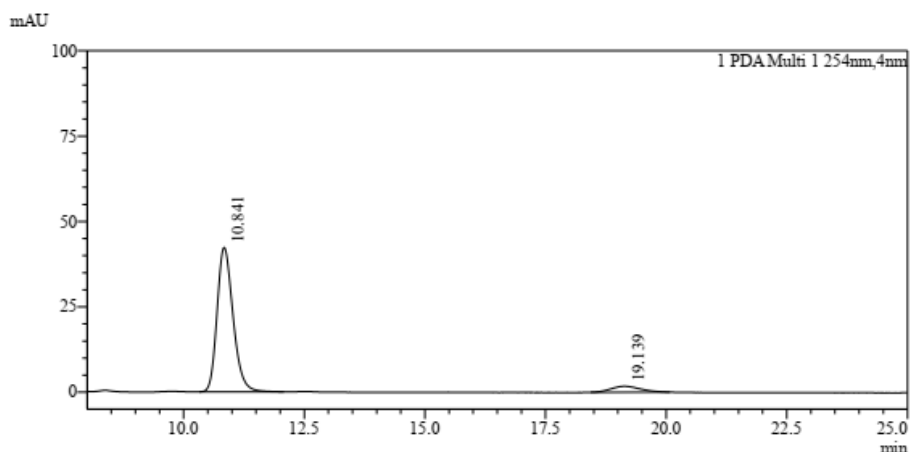

Peak Table

| Peak# | Ret. Time | Height | Height% | Area    | Area%   |
|-------|-----------|--------|---------|---------|---------|
| 1     | 10.841    | 42289  | 96.042  | 975695  | 92.973  |
| 2     | 19.139    | 1743   | 3.958   | 73741   | 7.027   |
| Total |           | 44032  | 100.000 | 1049437 | 100.000 |

Enantiomerically enriched **3r**

**tert-butyl (1*S*,9*bR*,*E*)-8-chloro-2-(3-(3,5-difluorophenyl)-1-ethoxy-1-oxopropan-2-ylidene)-5-(4-methoxybenzyl)-4-oxo-9*b*-(trifluoromethyl)-1,4,5,9*b*-tetrahydro-2*H*-azeto[1,2-*c*]quinazoline-1-carboxylate (3*s*)**

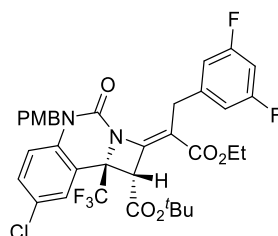

A white solid; 90% yield; m.p. = 83-88 °C;  $[\alpha]_D^{25} = -36.0$  (c 0.8, CHCl<sub>3</sub>); <sup>1</sup>H NMR (400 MHz, CDCl<sub>3</sub>) δ 7.26-7.22 (m, 2H), 7.10 (d, *J* = 8.7 Hz, 2H), 6.88-6.83 (m, 3H), 6.83-6.73 (m, 2H), 6.60 (tt, *J* = 9.0, 2.3 Hz, 1H), 5.02 (dd, *J* = 118.9, 16.4 Hz, 2H), 4.60 (s, 1H), 4.29 (dd, *J* = 220.4, 14.9 Hz, 2H), 4.26-4.04 (m, 2H), 3.78 (s, 3H), 1.21 (s, 9H), 1.20 (t, *J* = 7.1 Hz, 3H); <sup>13</sup>C NMR (100 MHz, CDCl<sub>3</sub>) δ 166.75, 164.21, 162.91 (d, *J* = 245.5 Hz), 162.78 (d, *J* = 245.5 Hz), 159.06, 150.92, 148.14, 145.48 (t, *J* = 18.0 Hz), 137.48, 131.02, 128.89, 127.44, 126.79 (d, *J* = 76.6 Hz), 116.71 (d, *J* = 86.71 Hz), 114.41, 111.29 (d, *J* = 24.7 Hz), 111.29 (d, *J* = 12.0 Hz), 109.92, 101.17 (t, *J* = 51.0 Hz), 83.48, 68.57, 68.25, 61.05, 58.45, 55.25, 47.20, 33.44, 27.61, 14.08; <sup>19</sup>F NMR (376 MHz, CDCl<sub>3</sub>) δ -81.00, -111.20; HRMS (ESI<sup>+</sup>): calcd for C<sub>35</sub>H<sub>32</sub>ClF<sub>5</sub>N<sub>2</sub>O<sub>6</sub> [M+Na]<sup>+</sup> = 729.1767, found = 729.1770; The ee value was 89%, *t*<sub>R</sub> (major) = 7.3 min, *t*<sub>R</sub> (minor) =

9.3 min (Chiralcel ID,  $\lambda = 254$  nm, hexane/2-propanol = 90/10, flow rate = 1.0 mL/min).

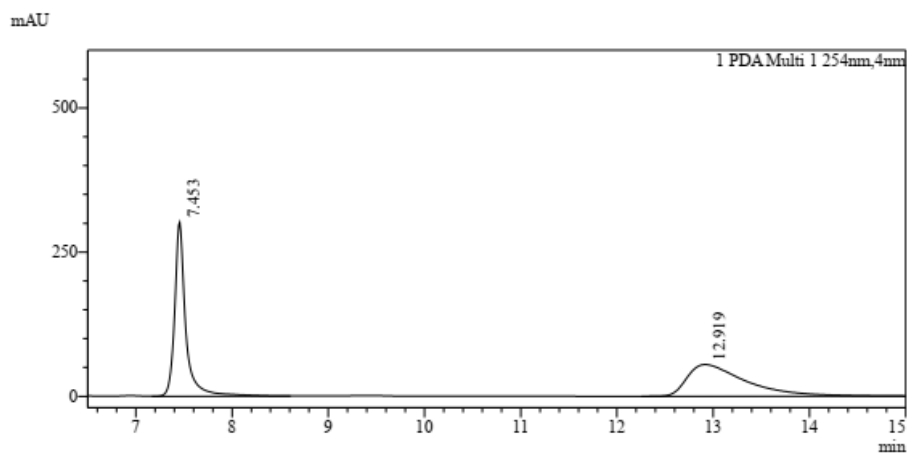

Peak Table

| Peak# | Ret. Time | Height | Height% | Area    | Area%   |
|-------|-----------|--------|---------|---------|---------|
| 1     | 7.453     | 301729 | 84.587  | 2431236 | 50.942  |
| 2     | 12.919    | 54979  | 15.413  | 2341311 | 49.058  |
| Total |           | 356708 | 100.000 | 4772547 | 100.000 |

### Racemic 3s

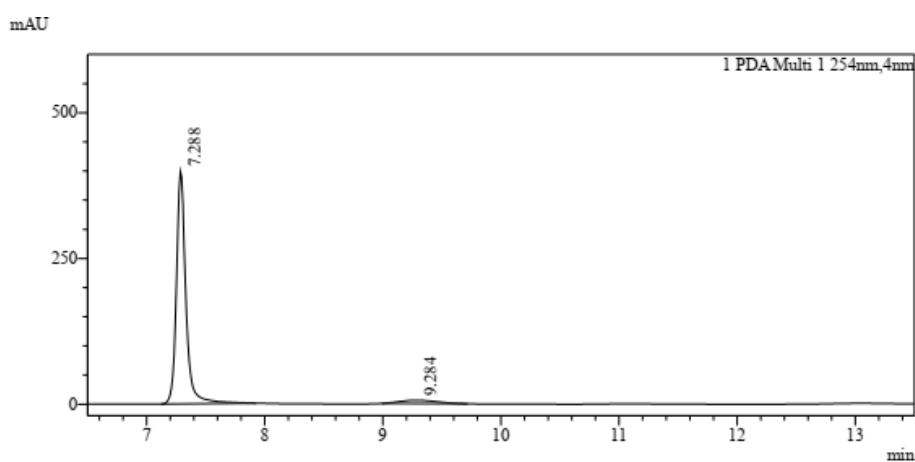

Peak Table

| Peak# | Ret. Time | Height | Height% | Area    | Area%   |
|-------|-----------|--------|---------|---------|---------|
| 1     | 7.288     | 398360 | 98.593  | 2218991 | 94.689  |
| 2     | 9.284     | 5685   | 1.407   | 124469  | 5.311   |
| Total |           | 404045 | 100.000 | 2343459 | 100.000 |

### Enantiomerically enriched 3s

***tert*-butyl (1*S*,9*bR*,*E*)-8-chloro-2-(1-isopropoxy-1-oxopropan-2-ylidene)-5-(4-methoxybenzyl)-4-oxo-9*b*-(trifluoromethyl)-1,4,5,9*b*-tetrahydro-2*H*-azeto[1,2-*c*]quinazoline-1-carboxylate (3*t*)**

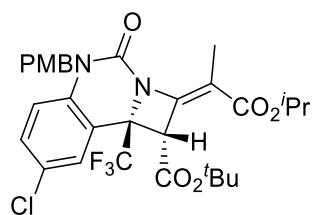

A white solid; 89% yield; m.p. = 132-135 °C;  $[\alpha]_D^{25} = -123.7$  (c 0.8,  $\text{CHCl}_3$ );  $^1\text{H}$  NMR (400 MHz,  $\text{CDCl}_3$ )  $\delta$  7.22-7.11 (m, 2H), 7.14 (d,  $J = 8.6$  Hz, 2H), 6.86-6.76 (m, 3H), 5.22-4.87 (m, 3H), 4.51 (s, 1H), 3.76 (s, 3H), 2.30 (s, 3H), 1.26 (d,  $J = 6.3$  Hz, 6H), 1.22 (s, 9H);  $^{13}\text{C}$  NMR (100 MHz,  $\text{CDCl}_3$ )  $\delta$  167.30, 164.86, 158.93, 148.86, 148.76, 137.67, 130.83, 128.33, 127.57, 127.44, 126.29, 116.85, 116.12, 114.34, 109.85, 83.07, 68.73 (q,  $J = 32.2$  Hz), 68.39, 59.00, 55.27, 46.67, 27.50, 21.91, 14.09;  $^{19}\text{F}$  NMR (376 MHz,  $\text{CDCl}_3$ )  $\delta$  -80.44; HRMS (ESI<sup>+</sup>): calcd for  $\text{C}_{30}\text{H}_{32}\text{ClF}_3\text{N}_2\text{O}_6$   $[\text{M}+\text{Na}]^+ = 631.1799$ , found = 631.1795; The ee value was 97%,  $t_R$  (major) = 5.8 min,  $t_R$  (minor) = 7.8 min (Chiralcel ID,  $\lambda = 254$  nm, hexane/2-propanol = 90/10, flow rate = 1.0 mL/min).

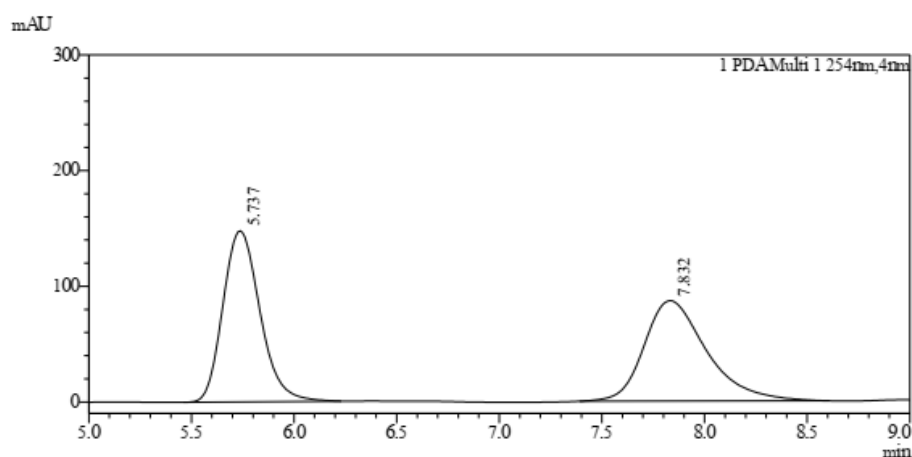

Peak Table

| Peak# | Ret. Time | Height | Height% | Area    | Area%   |
|-------|-----------|--------|---------|---------|---------|
| 1     | 5.737     | 147933 | 63.003  | 1859208 | 50.221  |
| 2     | 7.832     | 86872  | 36.997  | 1842826 | 49.779  |
| Total |           | 234805 | 100.000 | 3702034 | 100.000 |

### Racemic 3j

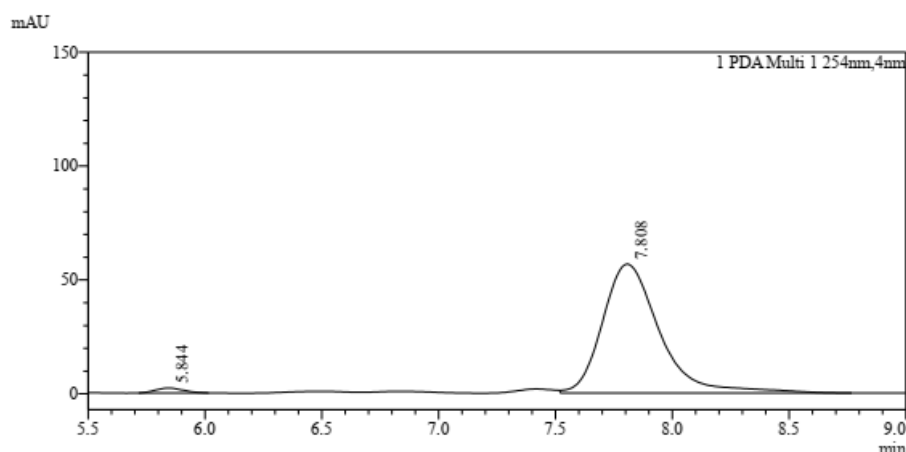

Peak Table

| Peak# | Ret. Time | Height | Height% | Area   | Area%   |
|-------|-----------|--------|---------|--------|---------|
| 1     | 5.844     | 2096   | 3.569   | 17351  | 1.776   |
| 2     | 7.808     | 56623  | 96.431  | 959509 | 98.224  |
| Total |           | 58719  | 100.000 | 976860 | 100.000 |

Enantiomerically enriched **3t**

**tert-butyl (1*S*,9*bR*,*E*)-2-(1-(benzyloxy)-1-oxopropan-2-ylidene)-8-chloro-5-(4-methoxybenzyl)-4-oxo-9*b*-(trifluoromethyl)-1,4,5,9*b*-tetrahydro-2*H*-azeto[1,2-*c*]quinazoline-1-carboxylate (3u)**

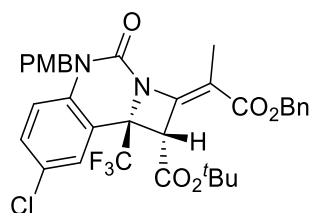

A white solid; 94% yield; m.p. = 111-114 °C;  $[\alpha]_D^{25} = -85.2$  (c 0.8, CHCl<sub>3</sub>); <sup>1</sup>H NMR (400 MHz, CDCl<sub>3</sub>) δ 7.39-7.29 (m, 5H), 7.22-7.17 (m, 2H), 7.13 (d, *J* = 8.6 Hz, 2H), 6.86-6.81 (m, 2H), 6.79 (d, *J* = 9.6 Hz, 1H), δ 5.17 (dd, *J* = 63.5, 12.5 Hz, 2H), δ 5.04 (dd, *J* = 58.4, 16.6 Hz, 2H), 4.54 (s, 1H), 3.77 (s, 3H), 2.36 (s, 3H), 1.22 (s, 9H); <sup>13</sup>C NMR (100 MHz, CDCl<sub>3</sub>) δ 167.63, 164.74, 158.97, 149.53, 148.71, 137.62, 136.06, 130.85, 128.55, 128.37, 128.19, 128.15, 127.57, 127.37, 126.26, 117.00, 116.22, 114.37, 108.91, 83.17, 68.70(q, *J* = 32.0 Hz), 66.29, 58.64, 55.27, 46.67, 27.64, 13.96; <sup>19</sup>F NMR (376 MHz, CDCl<sub>3</sub>) δ -80.72; HRMS (ESI<sup>+</sup>): calcd for C<sub>29</sub>H<sub>30</sub>ClF<sub>3</sub>N<sub>2</sub>O<sub>6</sub> [M+H]<sup>+</sup> = 595.1823, found = 595.1825; The ee value was 98%, *t*<sub>R</sub> (major) = 7.8 min, *t*<sub>R</sub> (minor) = 14.8 min (Chiralcel ID, λ = 254 nm, hexane/2-propanol = 90/10, flow rate = 1.0 mL/min).



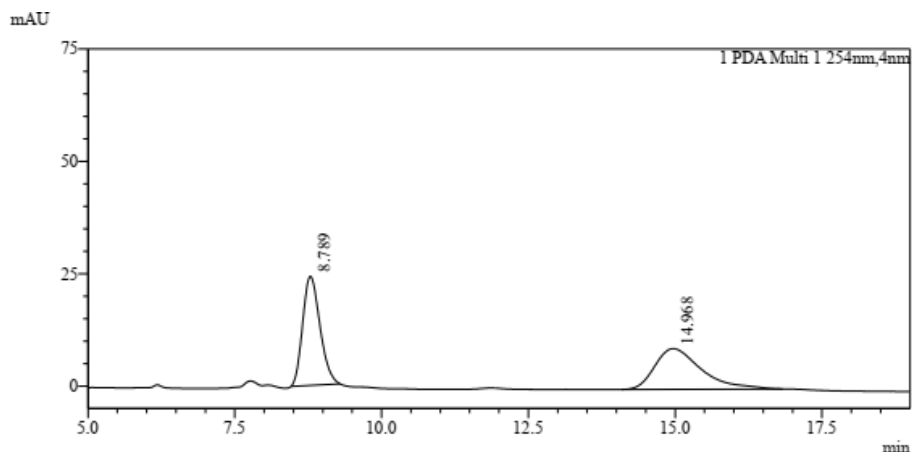

Peak Table

| Peak# | Ret. Time | Height | Height% | Area   | Area%   |
|-------|-----------|--------|---------|--------|---------|
| 1     | 8.789     | 24277  | 72.841  | 498098 | 49.944  |
| 2     | 14.968    | 9052   | 27.159  | 499209 | 50.056  |
| Total |           | 33329  | 100.000 | 997307 | 100.000 |

### Racemic **3u**

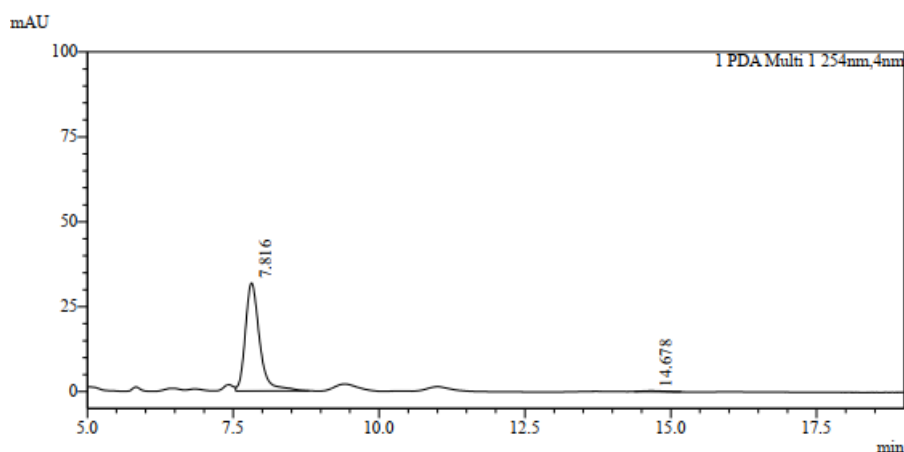

Peak Table

| Peak# | Ret. Time | Height | Height% | Area   | Area%   |
|-------|-----------|--------|---------|--------|---------|
| 1     | 7.816     | 31788  | 99.251  | 540023 | 98.954  |
| 2     | 14.678    | 240    | 0.749   | 5707   | 1.046   |
| Total |           | 32028  | 100.000 | 545731 | 100.000 |

### Enantiomerically enriched **3u**

**methyl (1*S*,9*bR*,*E*)-8-chloro-2-(1-ethoxy-1-oxopropan-2-ylidene)-5-(4-methoxybenzyl)-4-oxo-9b-(trifluoromethyl)-1,4,5,9b-tetrahydro-2H-azeto[1,2-c]quinazoline-1-carboxylate (3v)**

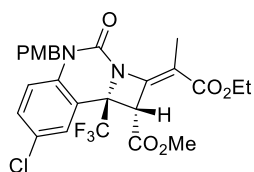

A white solid; 92% yield; m.p. = 129-132 °C;  $[\alpha]_D^{25} = -91.5$  (c 0.8, CHCl<sub>3</sub>); <sup>1</sup>H NMR (400 MHz, CDCl<sub>3</sub>) δ 7.21 (dd, *J* = 8.9, 2.4 Hz, 1H), 7.16-7.08 (m, 3H), 6.87-6.77 (m, 3H), 5.05 (dd, *J* = 108.0, 16.5 Hz, 2H), 4.70 (s, 1H), 4.24-4.10 (m, 2H), 3.76 (s, 3H), 3.61 (s, 3H), 2.34 (s, 3H), 1.26 (t, *J* = 7.1 Hz, 3H); <sup>13</sup>C NMR (100 MHz, CDCl<sub>3</sub>) δ 167.81, 166.64, 158.95, 148.71, 147.91, 137.57, 131.01, 128.52, 127.61, 127.17, 125.28, 117.35, 116.31, 114.37, 109.79, 68.56 (q, *J* = 32.5 Hz), 60.91, 57.45, 55.26, 52.64, 46.50, 14.20, 13.97; <sup>19</sup>F NMR (376 MHz, CDCl<sub>3</sub>) δ -81.07; HRMS (ESI<sup>+</sup>): calcd for C<sub>26</sub>H<sub>24</sub>ClF<sub>3</sub>N<sub>2</sub>O<sub>6</sub> [M+Na]<sup>+</sup> = 575.1173, found = 575.1176; The ee value was 77%, *t*<sub>R</sub> (major) = 8.7 min, *t*<sub>R</sub> (minor) = 11.6 min (Chiralcel ID, λ = 254 nm, hexane/2-propanol = 90/10, flow rate = 1.0 mL/min).

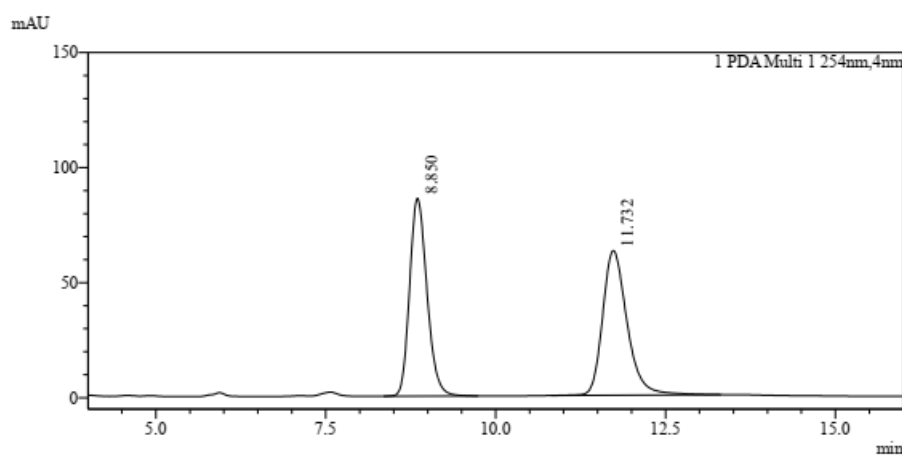

Peak Table

| PDA Ch1 254nm |           |        |         |         |         |
|---------------|-----------|--------|---------|---------|---------|
| Peak#         | Ret. Time | Height | Height% | Area    | Area%   |
| 1             | 8.850     | 85928  | 57.751  | 1533706 | 49.341  |
| 2             | 11.732    | 62862  | 42.249  | 1574698 | 50.659  |
| Total         |           | 148789 | 100.000 | 3108404 | 100.000 |

Racemic **3v**

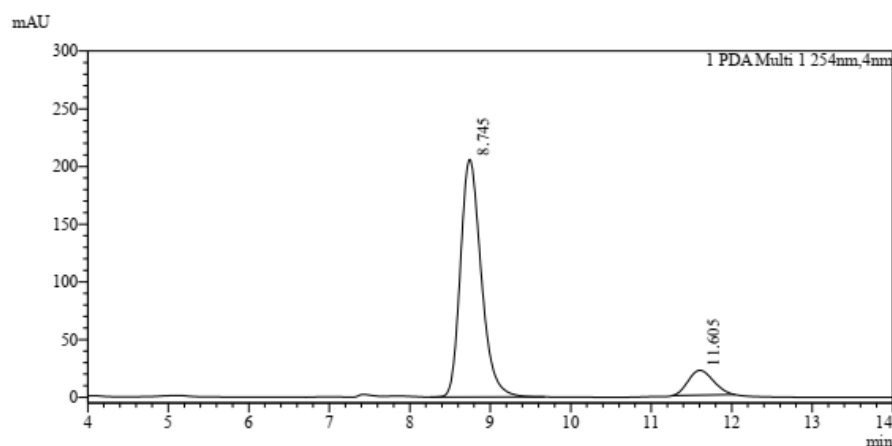

Peak Table

| Peak# | Ret. Time | Height | Height% | Area    | Area%   |
|-------|-----------|--------|---------|---------|---------|
| 1     | 8.745     | 205931 | 90.522  | 3703215 | 88.686  |
| 2     | 11.605    | 21563  | 9.478   | 472417  | 11.314  |
| Total |           | 227493 | 100.000 | 4175631 | 100.000 |

Enantiomerically enriched **3v**

**ethyl (1*S*,9*bR*,*E*)-8-chloro-2-(1-ethoxy-1-oxopropan-2-ylidene)-5-(4-methoxybenzyl)-4-oxo-9*b*-(trifluoromethyl)-1,4,5,9*b*-tetrahydro-2*H*-azeto[1,2-*c*]quinazoline-1-carboxylate (3*w*)**

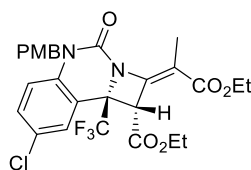

A white solid; 92% yield; m.p. = 132-134 °C;  $[\alpha]_D^{25} = -83.4$  (c 0.8, CHCl<sub>3</sub>); <sup>1</sup>H NMR (400 MHz, CDCl<sub>3</sub>) δ 7.20 (dd, *J* = 8.9, 2.4 Hz, 1H), 7.12 (d, *J* = 8.8 Hz, 3H), 6.87-6.81 (m, 2H), 6.79 (d, *J* = 8.9 Hz, 1H), 5.05 (dd, *J* = 83.6, 16.5 Hz, 2H), 4.65 (s, 1H), 4.17 (q, *J* = 7.1 Hz, 2H), 4.12-4.01 (m, 2H), 3.76 (s, 3H), 2.34 (s, 3H), 1.27 (t, *J* = 7.2 Hz, 3H), 1.09 (t, *J* = 7.1 Hz, 3H); <sup>13</sup>C NMR (100 MHz, CDCl<sub>3</sub>) δ 167.74, 166.09, 158.94, 148.73, 148.13, 137.60, 130.97, 128.43, 127.57, 127.20, 125.59, 117.23, 116.17, 114.36, 109.87, 68.57 (q, *J* = 32.3 Hz), 62.00, 60.87, 57.75, 55.27, 46.53, 14.22, 14.07, 13.87; <sup>19</sup>F NMR (376 MHz, CDCl<sub>3</sub>) δ -80.72; HRMS (ESI<sup>+</sup>): calcd for C<sub>27</sub>H<sub>26</sub>ClF<sub>3</sub>N<sub>2</sub>O<sub>6</sub> [M+Na]<sup>+</sup> = 589.1329, found = 589.1329; The ee value was 97%, *t<sub>R</sub>* (major) = 8.9 min, *t<sub>R</sub>* (minor) = 11.8 min (Chiralcel ID, λ = 254 nm, hexane/2-propanol = 90/10, flow rate = 1.0 mL/min).

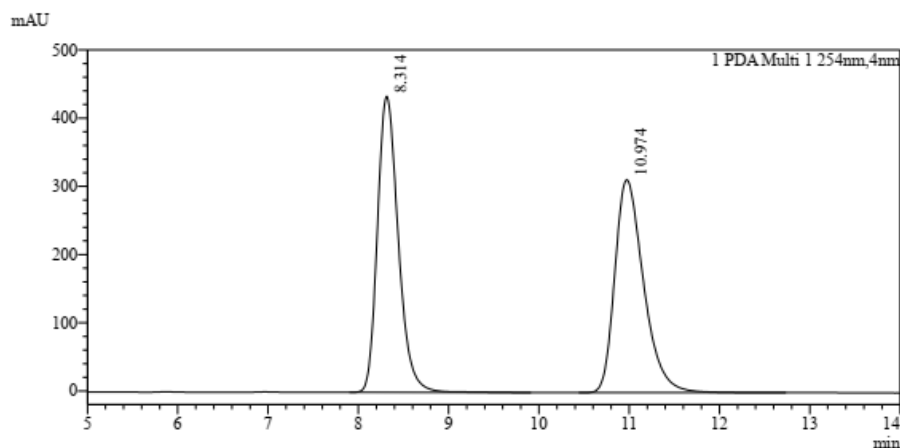

Peak Table

| Peak# | Ret. Time | Height | Height% | Area     | Area%   |
|-------|-----------|--------|---------|----------|---------|
| 1     | 8.314     | 433822 | 58.162  | 6978251  | 50.190  |
| 2     | 10.974    | 312057 | 41.838  | 6925397  | 49.810  |
| Total |           | 745879 | 100.000 | 13903648 | 100.000 |

### Racemic **3w**

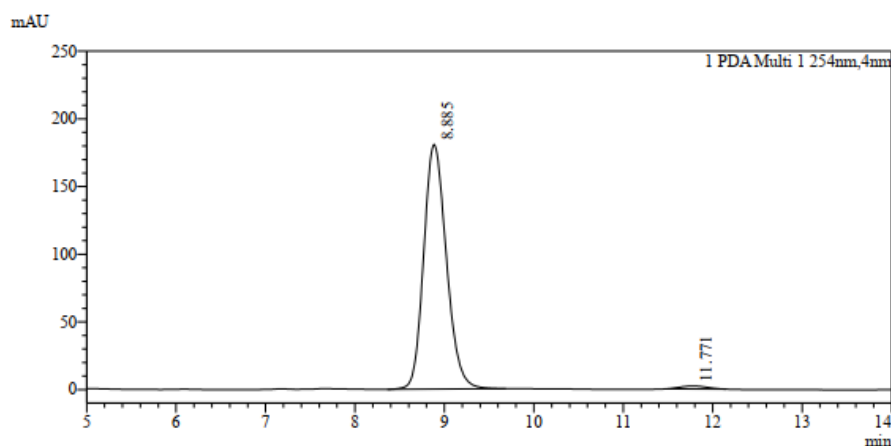

Peak Table

| Peak# | Ret. Time | Height | Height% | Area    | Area%   |
|-------|-----------|--------|---------|---------|---------|
| 1     | 8.885     | 180643 | 98.771  | 3195573 | 98.517  |
| 2     | 11.771    | 2249   | 1.229   | 48098   | 1.483   |
| Total |           | 182891 | 100.000 | 3243671 | 100.000 |

### Enantiomerically enriched **3w**

**phenyl (1*S*,9*bR*,*E*)-8-chloro-2-(1-ethoxy-1-oxopropan-2-ylidene)-5-(4-methoxybenzyl)-4-oxo-9b-(trifluoromethyl)-1,4,5,9b-tetrahydro-2H-azeto[1,2-c]quinazoline-1-carboxylate (3x)**

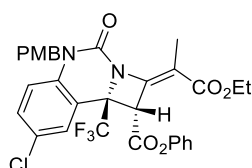

A white solid; 86% yield; m.p. = 134-136 °C;  $[\alpha]_D^{25} = -101.9$  (c 0.8, CHCl<sub>3</sub>); <sup>1</sup>H NMR (400 MHz, CDCl<sub>3</sub>) δ 7.34-7.29 (m, 3H), 7.28-7.25 (m, 1H), 7.24-7.18 (m, 1H), 7.09 (d, *J* = 8.7 Hz, 2H), 6.83 (d, *J* = 8.9 Hz, 1H), 6.79-6.71 (m, 4H), 5.07 (dd, *J* = 61.9, 16.5 Hz, 2H), 4.88 (s, 1H), 4.32-4.20 (m, 2H), 3.73 (s, 3H), 2.38 (s, 3H), 1.32 (t, *J* = 7.1 Hz, 3H); <sup>13</sup>C NMR (100 MHz, CDCl<sub>3</sub>) δ 167.89, 164.69, 158.84, 149.89, 148.67, 147.85, 137.57, 131.17, 129.52, 128.63, 127.42, 126.89, 126.39, 125.73, 121.09, 117.45, 115.94, 114.29, 109.94, 68.71 (q, *J* = 32.2 Hz), 61.03, 57.56, 55.16, 46.47, 14.25, 13.95; <sup>19</sup>F NMR (376 MHz, CDCl<sub>3</sub>) δ -80.72; HRMS (ESI<sup>+</sup>): calcd for C<sub>31</sub>H<sub>26</sub>ClF<sub>3</sub>N<sub>2</sub>O<sub>6</sub> [M+Na]<sup>+</sup> = 637.1329, found = 637.1328; The ee value was 92%, *t*<sub>R</sub> (major) = 10.3 min, *t*<sub>R</sub> (minor) = 27.3 min (Chiralcel ID, λ = 254 nm, hexane/2-propanol = 90/10, flow rate = 1.0 mL/min).

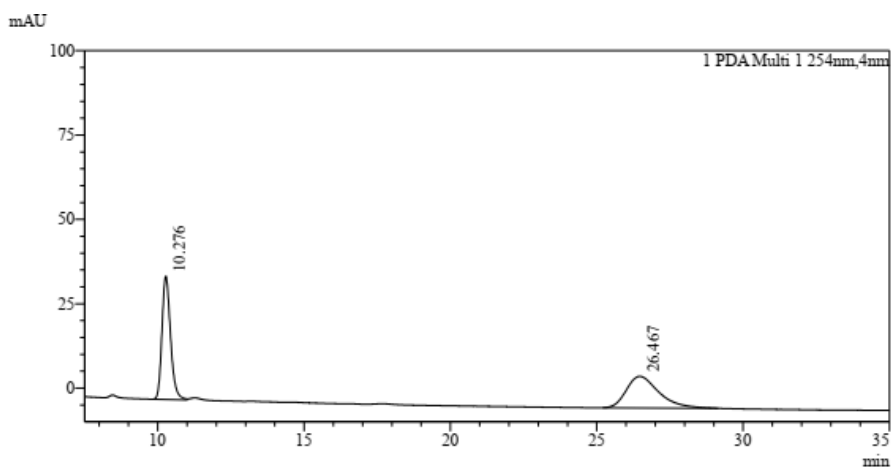

Peak Table

| Peak# | Ret. Time | Height | Height% | Area    | Area%   |
|-------|-----------|--------|---------|---------|---------|
| 1     | 10.276    | 36561  | 79.614  | 746991  | 50.772  |
| 2     | 26.467    | 9362   | 20.386  | 724283  | 49.228  |
| Total |           | 45923  | 100.000 | 1471274 | 100.000 |

Racemic **3x**

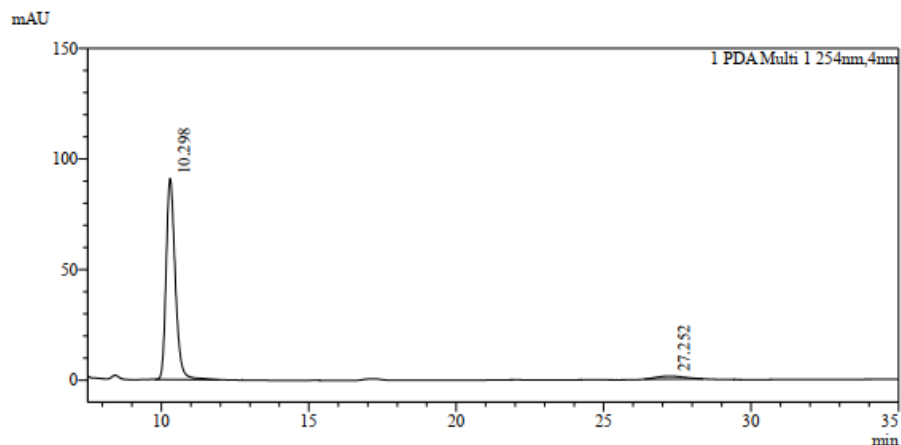

Peak Table

| Peak# | Ret. Time | Height | Height% | Area    | Area%   |
|-------|-----------|--------|---------|---------|---------|
| 1     | 10.298    | 90859  | 98.556  | 1957107 | 95.821  |
| 2     | 27.252    | 1331   | 1.444   | 85346   | 4.179   |
| Total |           | 92190  | 100.000 | 2042453 | 100.000 |

Enantiomerically enriched **3x**

**9H-fluoren-9-yl (1*S*,9*bR*,*E*)-8-chloro-2-(1-ethoxy-1-oxopropan-2-ylidene)-5-(4-methoxybenzyl)-4-oxo-9*b*-(trifluoromethyl)-1,4,5,9*b*-tetrahydro-2*H*-azeto[1,2-*c*]quinazoline-1-carboxylate (3*y*)**

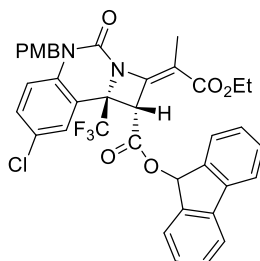

A white solid; 92% yield; m.p. = 171 – 175 °C;  $[\alpha]_D^{25} = -71.1$  (c 0.8, CHCl<sub>3</sub>); <sup>1</sup>H NMR (400 MHz, CDCl<sub>3</sub>) δ 7.67-7.59 (m, 2H), 7.43-7.37 (m, 2H), 7.33 (m, 2H), 7.25-7.22 (m, 2H), 7.10 (t, *J* = 7.4 Hz, 1H), 7.02-6.93 (m, 3H), 6.78-6.72 (m, 3H), 6.68 (s, 1H), 4.99 (dd, *J* = 31.7, 16.6 Hz, 2H), 4.84 (s, 1H), 4.31-4.08 (m, 2H), 3.77 (s, 3H), 2.31 (s, 3H), 1.27 (t, *J* = 7.1 Hz, 3H); <sup>13</sup>C NMR (100 MHz, CDCl<sub>3</sub>) δ 167.94, 167.00, 158.80, 148.34, 148.30, 140.99, 140.88, 137.79, 131.22, 129.68, 128.77, 128.08, 127.75, 127.24, 126.96, 125.99, 125.82, 120.00, 117.30, 115.90, 114.42, 109.62, 76.62, 68.80 (q, *J* = 31.9 Hz), 60.96, 57.97, 55.28, 46.61, 14.27, 13.94; <sup>19</sup>F NMR (376 MHz, CDCl<sub>3</sub>) δ -81.07; HRMS (ESI<sup>+</sup>): calcd for C<sub>38</sub>H<sub>30</sub>ClF<sub>3</sub>N<sub>2</sub>O<sub>6</sub> [M+Na]<sup>+</sup> = 725.1642, found = 725.1648; The ee value was 92%, *t*<sub>R</sub> (major) = 9.8 min, *t*<sub>R</sub> (minor) = 15.1 min (Chiralcel ID, λ = 254 nm, hexane/2-propanol = 90/10, flow rate = 1.0 mL/min).

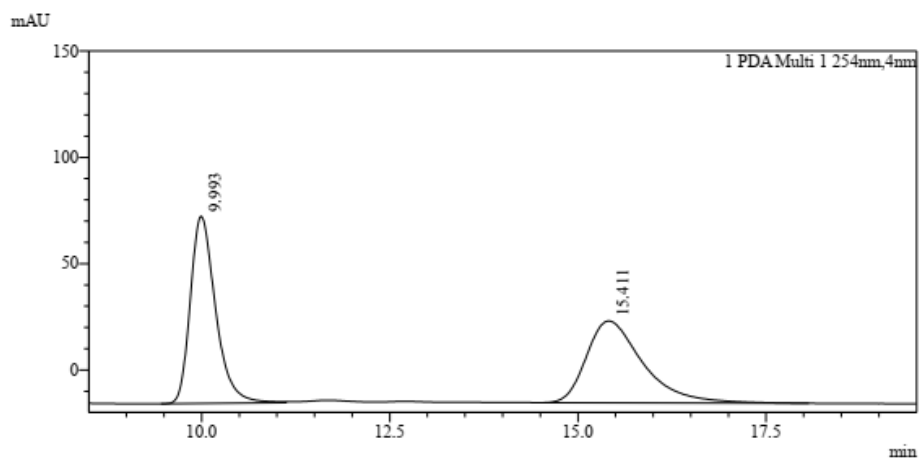

Peak Table

| PDA Ch1 254nm |           |        |         |         |         |
|---------------|-----------|--------|---------|---------|---------|
| Peak#         | Ret. Time | Height | Height% | Area    | Area%   |
| 1             | 9.993     | 88042  | 69.562  | 2059030 | 50.522  |
| 2             | 15.411    | 38523  | 30.438  | 2016505 | 49.478  |
| Total         |           | 126565 | 100.000 | 4075535 | 100.000 |

### Racemic **3i**

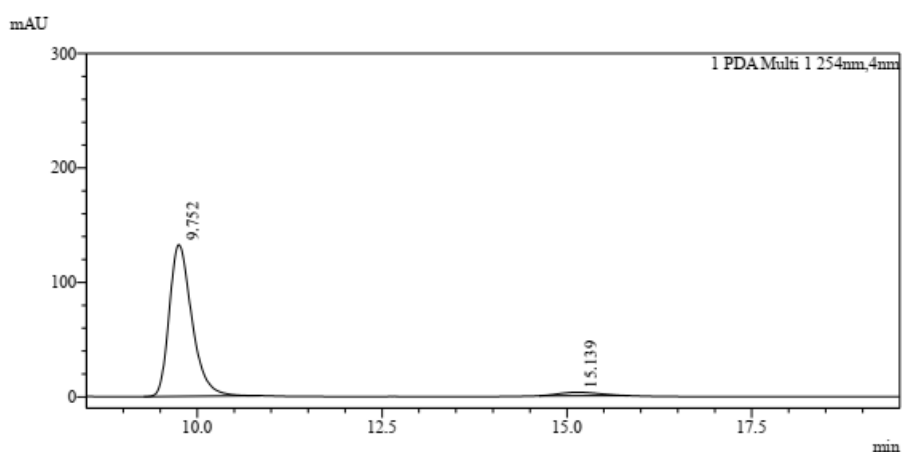

Peak Table

| PDA Ch1 254nm |           |        |         |         |         |
|---------------|-----------|--------|---------|---------|---------|
| Peak#         | Ret. Time | Height | Height% | Area    | Area%   |
| 1             | 9.752     | 132572 | 97.731  | 2834581 | 96.039  |
| 2             | 15.139    | 3078   | 2.269   | 116896  | 3.961   |
| Total         |           | 135650 | 100.000 | 2951477 | 100.000 |

### Enantiomerically enriched **3i**

**phenyl (1*S*,9*bR*,*E*)-8-chloro-5-(4-methoxybenzyl)-4-oxo-2-(2-oxo-2-phenoxethylidene)-9b-(trifluoromethyl)-1,4,5,9b-tetrahydro-2H-azeto[1,2-*c*]quinazoline-1-carboxylate (3z)**

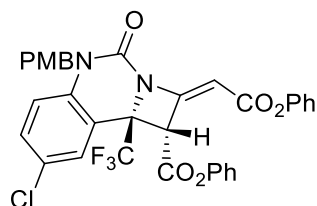

A white solid; 81% yield; m.p. = 168-171 °C;  $[\alpha]_D^{25} = -103.6$  (c 0.8,  $\text{CHCl}_3$ );  $^1\text{H}$  NMR (400 MHz,  $\text{CDCl}_3$ )  $\delta$  7.38 (t,  $J = 7.9$  Hz, 2H), 7.34-7.25 (m, 4H), 7.25-7.16 (m, 2H), 7.15-7.09 (m, 4H), 6.89 (d,  $J = 9.0$  Hz, 1H), 6.82 (d,  $J = 8.7$  Hz, 2H), 6.72-6.65 (m, 2H), 6.43 (d,  $J = 1.5$  Hz, 1H), 5.10 (dd,  $J = 103.3, 16.5$  Hz, 2H), 5.04 (d,  $J = 1.6$  Hz, 1H), 3.75 (s, 3H);  $^{13}\text{C}$  NMR (100 MHz,  $\text{CDCl}_3$ )  $\delta$  165.08, 163.26, 159.10, 154.24, 150.40, 149.83, 148.64, 137.60, 131.56, 129.59, 129.47, 129.21, 127.52, 126.62, 126.57, 126.07, 125.96, 121.60, 121.10, 117.97, 115.59, 114.52, 98.39, 69.36 (q,  $J = 32.9$  Hz), 55.79, 55.27, 46.24;  $^{19}\text{F}$  NMR (376 MHz,  $\text{CDCl}_3$ )  $\delta$  -80.72; HRMS (ESI<sup>+</sup>): calcd for  $\text{C}_{34}\text{H}_{24}\text{ClF}_3\text{N}_2\text{O}_6$   $[\text{M}+\text{Na}]^+ = 671.1173$ , found = 671.1175; The ee value was 97%,  $t_R$  (major) = 12.7 min,  $t_R$  (minor) = 28.7 min (Chiralcel ID,  $\lambda = 254$  nm, hexane/2-propanol = 90/10, flow rate = 1.0 mL/min).

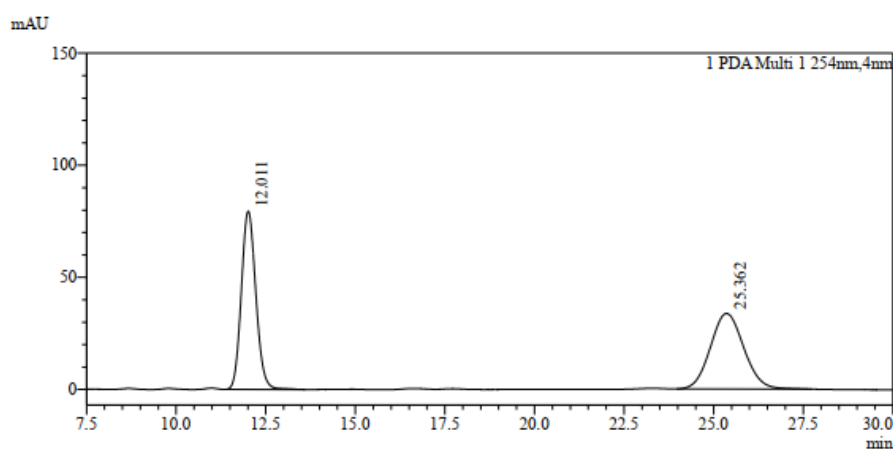

Peak Table

| Peak# | Ret. Time | Height | Height% | Area    | Area%   |
|-------|-----------|--------|---------|---------|---------|
| 1     | 12.011    | 79544  | 70.245  | 2244545 | 50.628  |
| 2     | 25.362    | 33694  | 29.755  | 2188861 | 49.372  |
| Total |           | 113238 | 100.000 | 4433405 | 100.000 |

Racemic **3z**



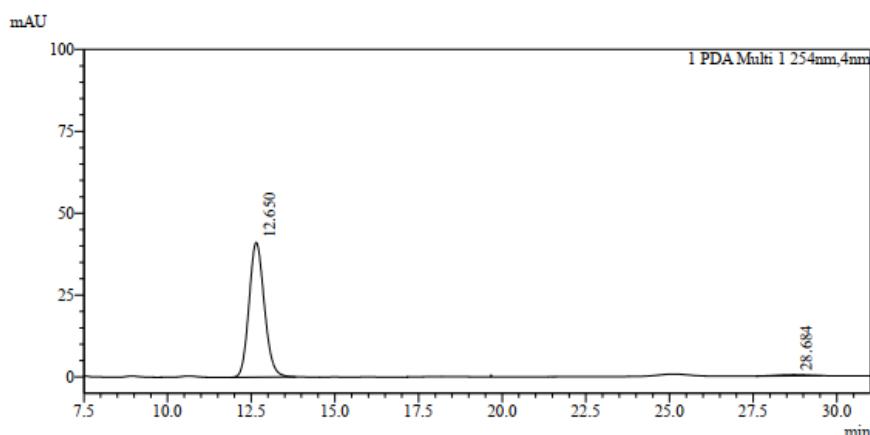

Peak Table

| Peak# | Ret. Time | Height | Height% | Area    | Area%   |
|-------|-----------|--------|---------|---------|---------|
| 1     | 12.650    | 41121  | 99.196  | 1310158 | 98.426  |
| 2     | 28.684    | 333    | 0.804   | 20956   | 1.574   |
| Total |           | 41454  | 100.000 | 1331113 | 100.000 |

Enantiomerically enriched **3z**

**tert-butyl (1*S*,9*bR*,*E*)-2-(1-ethoxy-1-oxo-3-(*o*-tolyl)propan-2-ylidene)-8-methoxy - 5-(4-methoxybenzyl)-4-oxo-9*b*-(trifluoromethyl)-1,4,5,9*b*-tetrahydro-2*H*-azeto[1,2-*c*]quinazoline-1-carboxylate (4a)**

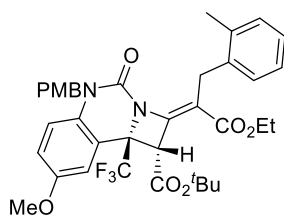

A white solid; 84% yield; m.p. = 134-136 °C;  $[\alpha]_D^{25} = -81.7$  (c 0.8, CHCl<sub>3</sub>); <sup>1</sup>H NMR (400 MHz, CDCl<sub>3</sub>) δ 7.13-6.99 (m, 6H), 6.86-6.70 (m, 5H), 4.93 (dd, *J* = 119.6, 16.3 Hz, 2H), 4.62 (s, 1H), 4.27 (dd, *J* = 100.3, 9.9 Hz, 2H), 4.18-3.98 (m, 2H), 3.76 (s, 3H), 3.73 (s, 3H), 2.39 (s, 3H), 1.18 (s, 9H), 1.15 (t, *J* = 7.1 Hz, 3H); <sup>13</sup>C NMR (100 MHz, CDCl<sub>3</sub>) δ 167.42, 164.78, 158.75, 155.24, 150.91, 148.23, 139.86, 136.05, 132.35, 129.76, 128.25, 127.69, 127.31, 125.38, 125.25, 116.80, 116.45, 115.93, 114.17, 111.69, 110.06, 82.74, 68.64 (q, 32.3 Hz), 60.71, 58.46, 55.61, 55.24, 47.03, 30.56, 27.64, 19.80, 14.09; <sup>19</sup>F NMR (376 MHz, CDCl<sub>3</sub>) δ -80.79; HRMS (ESI<sup>+</sup>): calcd for C<sub>37</sub>H<sub>39</sub>F<sub>3</sub>N<sub>2</sub>O<sub>7</sub> [M+Na]<sup>+</sup> = 703.2607, found = 703.2603; The ee value was 99.7%, *t<sub>R</sub>* (major) = 9.3 min, *t<sub>R</sub>* (minor) = 20.0 min (Chiralcel IG, λ = 254 nm, hexane/2-propanol = 90/10, flow rate = 1.0 mL/min).

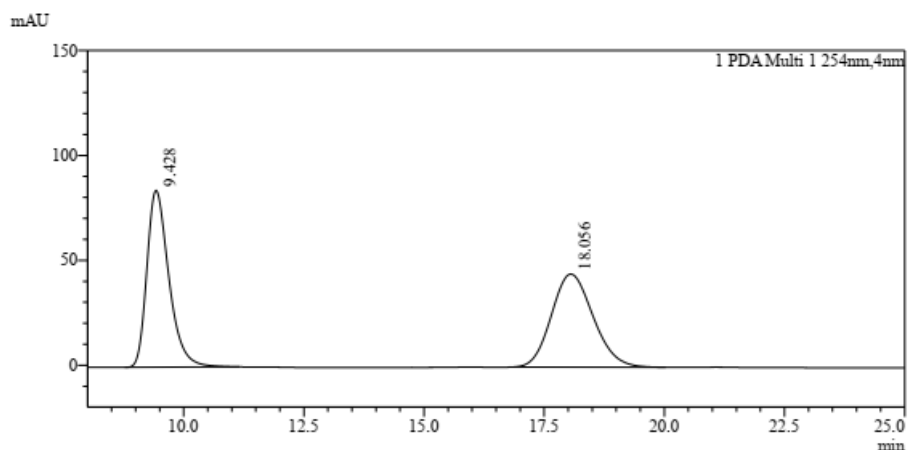

Peak Table

| Peak# | Ret. Time | Height | Height% | Area    | Area%   |
|-------|-----------|--------|---------|---------|---------|
| 1     | 9.428     | 84260  | 65.495  | 2680354 | 49.956  |
| 2     | 18.056    | 44392  | 34.505  | 2685048 | 50.044  |
| Total |           | 128653 | 100.000 | 5365402 | 100.000 |

### Racemic 4a

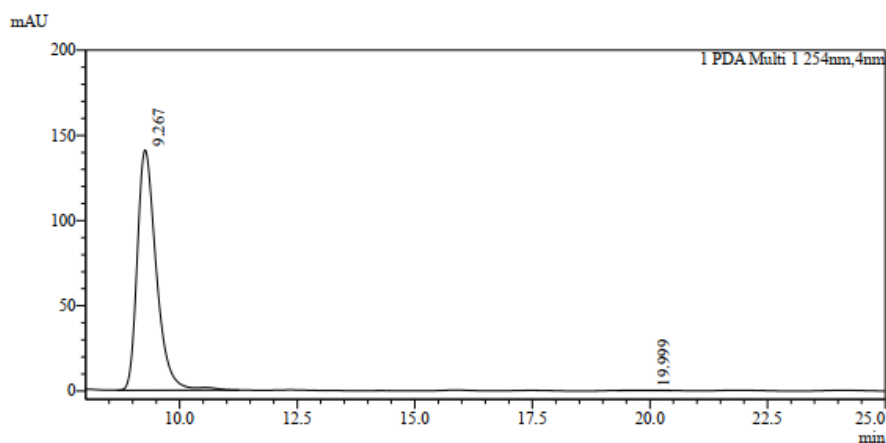

Peak Table

| Peak# | Ret. Time | Height | Height% | Area    | Area%   |
|-------|-----------|--------|---------|---------|---------|
| 1     | 9.267     | 140984 | 99.877  | 3969780 | 99.821  |
| 2     | 19.999    | 173    | 0.123   | 7110    | 0.179   |
| Total |           | 141157 | 100.000 | 3976889 | 100.000 |

### Enantiomerically enriched 4a

***tert*-butyl (1*S*,9*bR*,*E*)-2-(1-ethoxy-1-oxo-3-(*o*-tolyl)propan-2-ylidene)-8-fluoro-5-(4-methoxybenzyl)-4-oxo-9*b*-(trifluoromethyl)-1,4,5,9*b*-tetrahydro-2*H*-azeto[1,2-*c*]quinazoline-1-carboxylate (4*b*)**

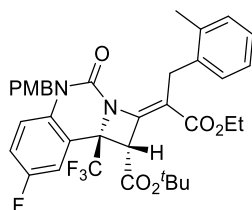

A white solid; 92% yield; m.p. = 131–137 °C;  $[\alpha]_D^{25} = -124.3$  (c 0.8, CHCl<sub>3</sub>); <sup>1</sup>H NMR (400 MHz, CDCl<sub>3</sub>) δ 7.21-6.92 (m, 8H), 6.87 (dd, *J* = 9.1, 4.3 Hz, 1H), 6.81 (d, *J* = 8.6 Hz, 2H), 4.98 (dd, *J* = 107.9, 16.7 Hz, 2H), 4.68 (s, 1H), 4.29 (dd, *J* = 87.3, 15.7 Hz, 2H), 4.19-4.01 (m, 2H), 3.80 (s, 3H), 2.43 (s, 3H), 1.27 (s, 9H), 1.18 (t, *J* = 7.1 Hz, 3H); <sup>13</sup>C NMR (100 MHz, CDCl<sub>3</sub>) δ 167.30, 164.55, 158.91, 158.13 (d, *J* = 245.0 Hz), 150.49, 148.08, 139.65, 136.02, 135.35, 129.78, 127.67, 127.29, 125.39 (d, *J* = 12.3 Hz), 117.65 (d, *J* = 22.3 Hz), 117.16 (d, *J* = 7.6 Hz), 116.45 (d, *J* = 7.6 Hz), 114.29, 113.77 (d, *J* = 24.6 Hz), 110.61, 83.11, 68.39 (q, *J* = 32.2 Hz), 60.76, 58.31, 55.24, 47.19, 30.54, 27.69, 19.77, 14.07; <sup>19</sup>F NMR (376 MHz, CDCl<sub>3</sub>) δ -80.94, -119.20; The ee value was 99.5%, *t*<sub>R</sub> (major) = 9.2 min, *t*<sub>R</sub> (minor) = 12.0 min (Chiralcel ID, λ = 254 nm, hexane/2-propanol = 90/10, flow rate = 0.5 mL/min).

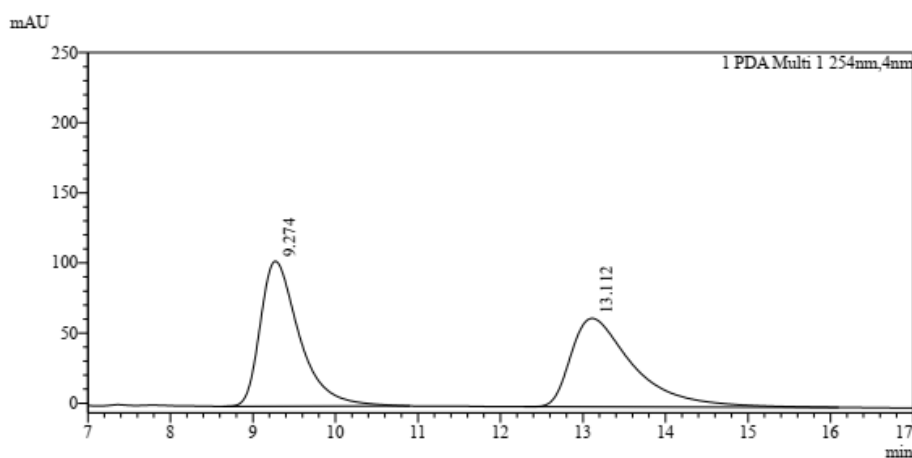

Peak Table

| PDA Ch1 254nm |           |        |         |         |         |
|---------------|-----------|--------|---------|---------|---------|
| Peak#         | Ret. Time | Height | Height% | Area    | Area%   |
| 1             | 9.274     | 103372 | 62.099  | 3412990 | 50.660  |
| 2             | 13.112    | 63092  | 37.901  | 3323996 | 49.340  |
| Total         |           | 166465 | 100.000 | 6736986 | 100.000 |

Racemic **4b**

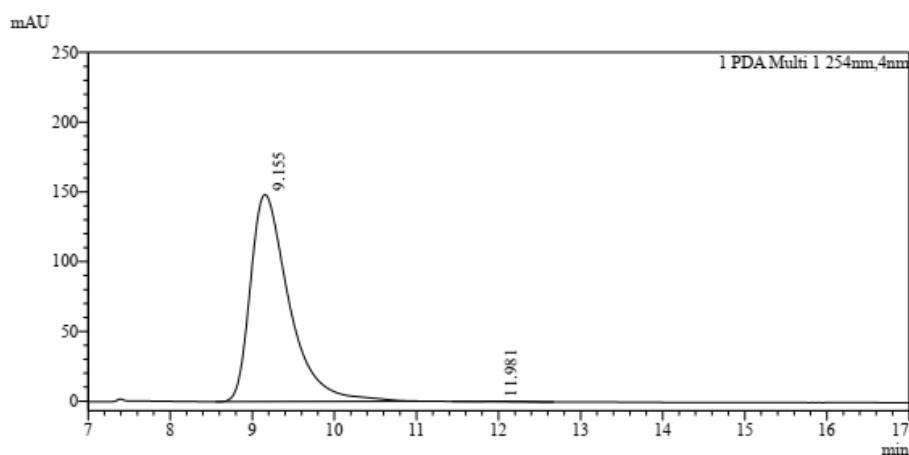

Peak Table

| Peak# | Ret. Time | Height | Height% | Area    | Area%   |
|-------|-----------|--------|---------|---------|---------|
| 1     | 9.155     | 148473 | 99.767  | 4867007 | 99.758  |
| 2     | 11.981    | 346    | 0.233   | 11805   | 0.242   |
| Total |           | 148820 | 100.000 | 4878813 | 100.000 |

Enantiomerically enriched **4b**

**tert-butyl (1*S*,9*bR*,*E*)-2-(1-ethoxy-1-oxo-3-(*o*-tolyl)propan-2-ylidene)-5-(4-methoxybenzyl)-4-oxo-8,9*b*-bis(trifluoromethyl)-1,4,5,9*b*-tetrahydro-2*H*-azeto[1,2-*c*]quinazoline-1-carboxylate (4c)**

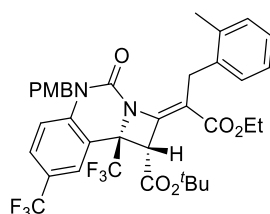

A white solid; 92% yield; m.p. = 151 – 154 °C;  $[\alpha]_D^{25} = -108.9$  (c 0.8, CHCl<sub>3</sub>); <sup>1</sup>H NMR (400 MHz, CDCl<sub>3</sub>) δ 7.53 (d, *J* = 7.1 Hz, 2H), 7.13-6.97 (m, 7H), 6.79 (d, *J* = 8.7 Hz, 2H), 5.00 (dd, *J* = 95.7, 16.3 Hz, 2H), 4.69 (s, 1H), 4.25 (dd, *J* = 70.1, 16.0 Hz, 2H), 4.21-4.01 (m, 2H), 3.77 (s, 3H), 2.40 (s, 3H), 1.20 (s, 9H), 1.16 (t, *J* = 7.1 Hz, 3H); <sup>13</sup>C NMR (100 MHz, CDCl<sub>3</sub>) δ 167.11, 164.46, 159.01, 150.28, 147.87, 141.90, 139.53, 136.03, 129.83, 128.21 (q, *J* = 31.9 Hz), 127.70, 127.30, 127.24, 125.54, 125.34, 123.74, 115.88, 115.24, 114.37, 111.47, 83.31, 69.37-67.79 (q, *J* = 32.5 Hz), 60.90, 58.63, 55.26, 47.17, 30.68, 27.60, 19.78, 14.04; <sup>19</sup>F NMR (376 MHz, CDCl<sub>3</sub>) δ -62.28, -81.13; HRMS (ESI<sup>+</sup>): calcd for C<sub>37</sub>H<sub>36</sub>F<sub>6</sub>N<sub>2</sub>O<sub>6</sub> [M+H]<sup>+</sup> = 719.2556, found = 719.2555; The ee value was 81%, *t*<sub>R</sub> (major) = 5.4 min, *t*<sub>R</sub> (minor) = 6.9 min (Chiralcel ID, λ = 254 nm, hexane/2-propanol = 90/10, flow rate = 1.0 mL/min).

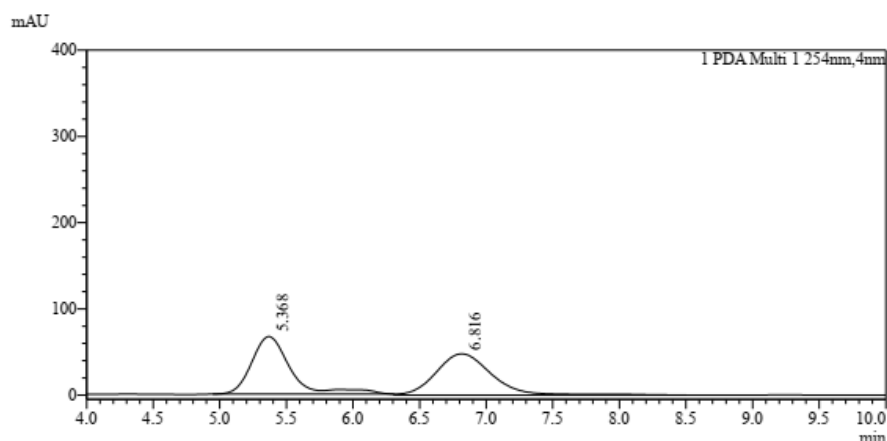

Peak Table

| Peak# | Ret. Time | Height | Height% | Area    | Area%   |
|-------|-----------|--------|---------|---------|---------|
| 1     | 5.368     | 66709  | 58.223  | 1367750 | 49.669  |
| 2     | 6.816     | 47867  | 41.777  | 1385971 | 50.331  |
| Total |           | 114575 | 100.000 | 2753721 | 100.000 |

### Racemic 4c

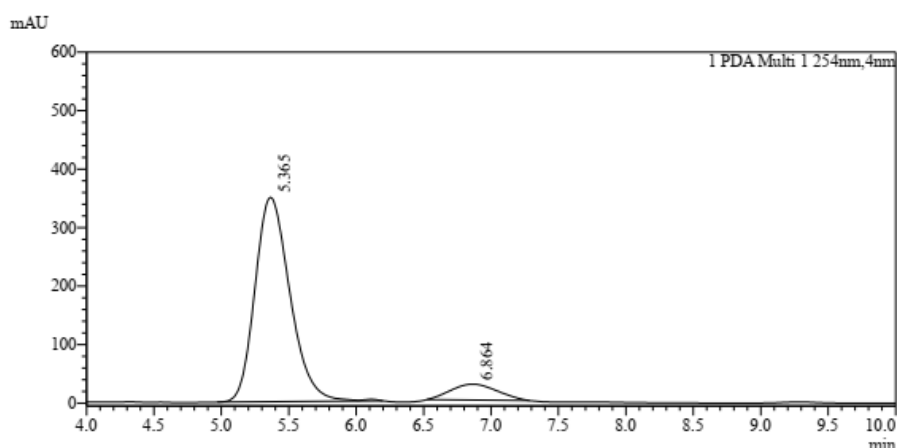

Peak Table

| Peak# | Ret. Time | Height | Height% | Area    | Area%   |
|-------|-----------|--------|---------|---------|---------|
| 1     | 5.365     | 349549 | 92.847  | 6320583 | 90.755  |
| 2     | 6.864     | 26929  | 7.153   | 643901  | 9.245   |
| Total |           | 376478 | 100.000 | 6964483 | 100.000 |

### Enantiomerically enriched 4c

***tert*-butyl (1*S*,9*bR*,*E*)-8-chloro-2-(1-ethoxy-1-oxo-3-(*o*-tolyl)propan-2-ylidene)-5-(naphthalen-1-ylmethyl)-4-oxo-9*b*-(trifluoromethyl)-1,4,5,9*b*-tetrahydro-2*H*-azeto[1,2-*c*]quinazoline-1-carboxylate (4*d*)**

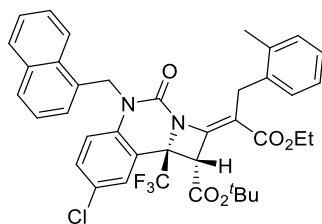

A white solid; 89% yield; m.p. = 121 – 123 °C;  $[\alpha]_D^{25} = -91.4$  (c 0.8, CHCl<sub>3</sub>); <sup>1</sup>H NMR (400 MHz, CDCl<sub>3</sub>) δ 7.95 (d, *J* = 8.2 Hz, 1H), 7.93-7.87 (m, 1H), 7.75 (d, *J* = 8.2 Hz, 1H), 7.62-7.50 (m, 2H), 7.36-7.25 (m, 2H), 7.17-7.01 (m, 5H), 6.97 (d, *J* = 7.1 Hz, 1H), 6.59 (d, *J* = 8.9 Hz, 1H), 5.49 (dd, *J* = 29.2, 17.3 Hz, 2H), 4.72 (s, 1H), 4.26 (dd, *J* = 53.7, 15.8 Hz, 2H), 4.18-3.99 (m, 2H), 2.36 (s, 3H), 1.34 (s, 9H), 1.16 (t, *J* = 7.1 Hz, 3H); <sup>13</sup>C NMR (100 MHz, CDCl<sub>3</sub>) δ 167.27, 164.63, 150.30, 147.91, 139.40, 137.73, 136.01, 133.88, 130.99, 130.32, 129.80, 129.42, 129.13, 128.78, 127.92, 127.36, 126.53, 126.43, 126.00, 125.54, 125.39, 122.63, 122.06, 117.21, 116.46, 111.13, 83.36, 68.53 (q, *J* = 32.5 Hz), 60.82, 58.33, 45.38, 30.50, 27.80, 19.77, 14.06; <sup>19</sup>F NMR (376 MHz, CDCl<sub>3</sub>) δ -80.72; HRMS (ESI<sup>+</sup>): calcd for C<sub>39</sub>H<sub>36</sub>ClF<sub>3</sub>N<sub>2</sub>O<sub>6</sub> [M+Na]<sup>+</sup> = 727.2163, found = 727.2168; The ee value was 92%, *t<sub>R</sub>* (major) = 7.8 min, *t<sub>R</sub>* (minor) = 18.2 min (Chiralcel ID, λ = 254 nm, hexane/2-propanol = 90/10, flow rate = 1.0 mL/min).

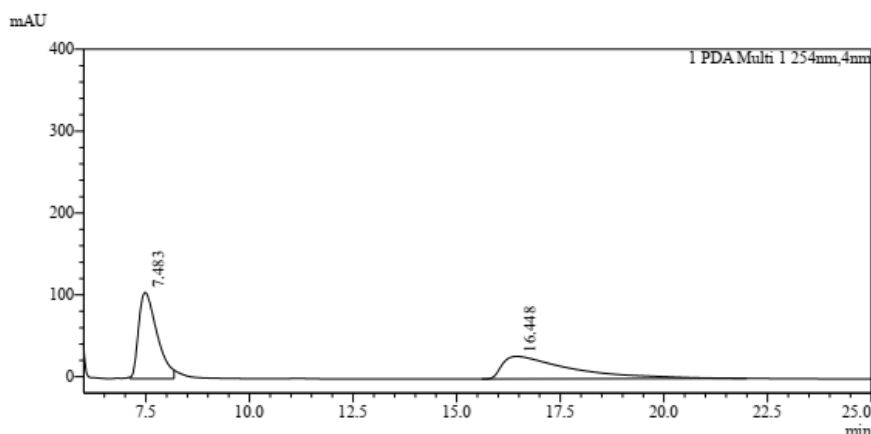

Peak Table

| Peak# | Ret. Time | Height | Height% | Area    | Area%   |
|-------|-----------|--------|---------|---------|---------|
| 1     | 7.483     | 105199 | 79.310  | 3244453 | 50.854  |
| 2     | 16.448    | 27443  | 20.690  | 3135482 | 49.146  |
| Total |           | 132642 | 100.000 | 6379935 | 100.000 |

Racemic **4d**

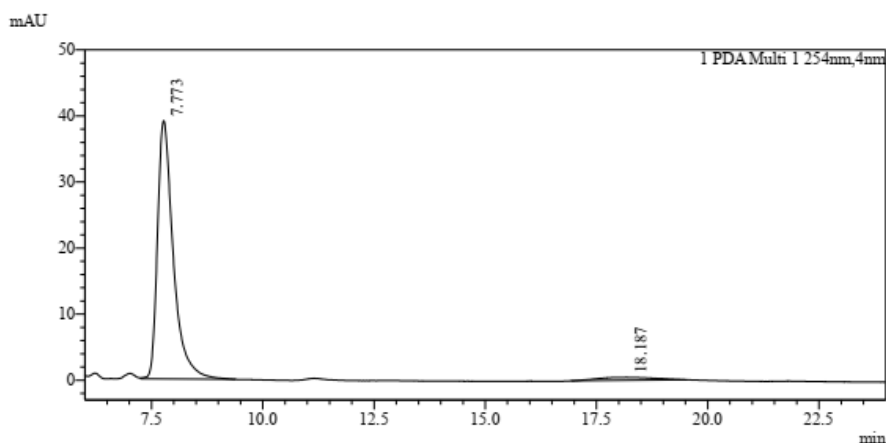

Peak Table

| Peak# | Ret. Time | Height | Height% | Area    | Area%   |
|-------|-----------|--------|---------|---------|---------|
| 1     | 7.773     | 39076  | 98.884  | 969213  | 96.028  |
| 2     | 18.187    | 441    | 1.116   | 40090   | 3.972   |
| Total |           | 39517  | 100.000 | 1009302 | 100.000 |

Enantiomerically enriched **4d**

## 6. Gram-scale preparations and transformations

### A. Procedure for the scale-up synthesis and transformations of **3f**

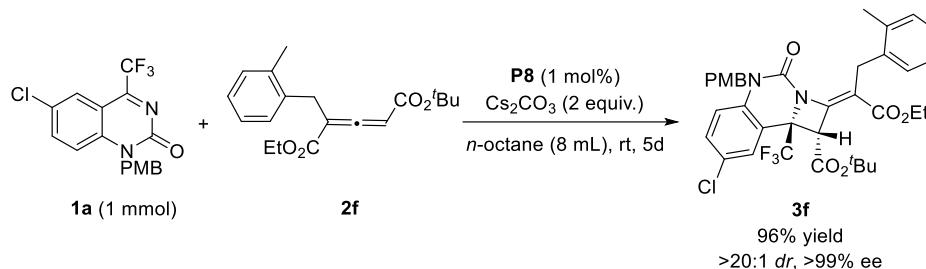

To a round bottle flask with a magnetic stirring bar were added cyclic trifluoroketimine **1a** (1 mmol), phosphonium salt **P8** (10.2 mg, 0.01 mmol) and  $\text{Cs}_2\text{CO}_3$  (65.2 mg, 2 mmol), allene **2p** was dissolved by *n*-octane (8.0 mL) and added in. The reaction mixture was stirred at room temperature for 5 d and TLC show that the reaction was completed. Purified by chromatography on silica gel (petroleum ether/ethyl acetate = 10:1) to afforded product **3f** (96% yield, 656.9 mg, >20:1 *dr*, >99% *ee*).

**(1*S*,9*bR*,*E*)-8-chloro-2-(1-hydroxy-3-(*o*-tolyl)propan-2-ylidene)-1-(hydroxyl methyl)-5-(4-methoxybenzyl)-9b-(trifluoromethyl)-1,2,5,9b-tetrahydro-4H-azeto[1,2-*c*]quinazolin-4-one (5a)**

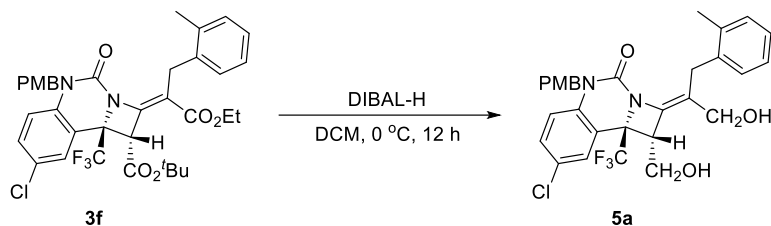

Under nitrogen atmosphere, a round bottle flask with a magnetic stirring bar were added **3f** (>20:1 *dr*, >99% ee, 68.5 mg, 0.1 mmol), and dry DCM (2 mL), (*i*Bu)<sub>2</sub>AlH (0.7 mL, 0.7 mmol), after stired for 12 h at 0 °C. H<sub>2</sub>O (3 mL) was added, the mixture was extracted with DCM (5 mL × 3), dried over Na<sub>2</sub>SO<sub>4</sub>, and the solvent was removed under reduced pressure, the residue was purified by column chromatography on silica gel (petroleum ether/ethyl acetate = 2 : 1) to give **5a** (>20:1 *dr*, 81% yield, 46.4 mg) as a white solid; m.p. = 132-136 °C; [ $\alpha$ ]<sub>D</sub><sup>25</sup> = -94.2 (c 0.8, CHCl<sub>3</sub>); <sup>1</sup>H NMR (400 MHz, CD<sub>3</sub>OD)  $\delta$  7.55 (s, 1H), 7.28 (dd, *J* = 8.9, 2.3 Hz, 1H), 7.25-7.21 (m, 1H), 7.19-7.09 (m, 5H), 6.90 (d, *J* = 9.0 Hz, 1H), 6.86 (d, *J* = 8.7 Hz, 2H), 5.06 (s, 2H), 4.79-4.48 (m, 1H), 3.99-3.89 (m, 3H), 3.87 (t, *J* = 4.6 Hz, 1H), 3.81 (m, 1H), 3.76 (s, 3H), 3.70 (m, 1H), 2.37 (s, 3H); <sup>13</sup>C NMR (100 MHz, CD<sub>3</sub>OD)  $\delta$  158.95, 150.11, 138.33, 138.03, 137.70, 136.67, 129.85, 129.61, 129.31, 127.96, 127.35, 127.31, 126.76, 125.76, 125.34, 119.91, 116.80, 115.90, 113.76, 68.61 (q, *J* = 24.6 Hz), 58.88, 58.06, 54.30, 52.57, 45.71, 31.91, 18.30; <sup>19</sup>F NMR (376 MHz, CD<sub>3</sub>OD)  $\delta$  -82.01. HRMS (ESI<sup>+</sup>): calcd for C<sub>30</sub>H<sub>28</sub>ClF<sub>3</sub>N<sub>2</sub>O<sub>4</sub> [M+H]<sup>+</sup> = 573.1768, found = 573.1776.

**(1*S*,9*bR*,*E*)-8-chloro-2-(1-ethoxy-1-oxo-3-(*o*-tolyl)propan-2-ylidene)-5-(4-methoxybenzyl)-4-oxo-9*b*-(trifluoromethyl)-1,4,5,9*b*-tetrahydro-2*H*-azeto[1,2-*c*]quinazoline-1-carboxylic acid (5b)**

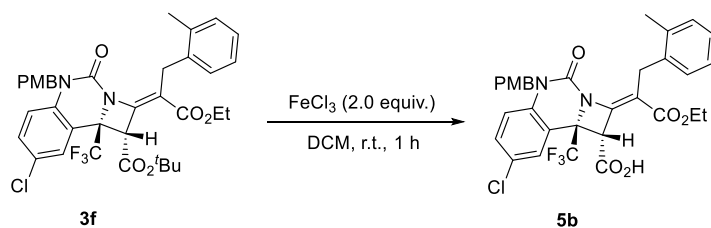

A round bottle flask with a magnetic stirring bar were added **3f** (>20:1 *dr*, >99% ee, 68.5 mg, 0.1 mmol), and dry DCM (2 mL), FeCl<sub>3</sub> (32.4 mg, 0.2 mmol), after stired for 1 h at room temperature, the mixture was filtrated and purified by column chromatography on silica gel (ethyl acetate) to give **5b** (>20:1 *dr*, 56.6 mg, 91% yield) as a white solid; m.p. = 181-183 °C; [ $\alpha$ ]<sub>D</sub><sup>25</sup> = -61.2 (c 0.8, CHCl<sub>3</sub>); <sup>1</sup>H NMR (400 MHz, CD<sub>3</sub>OD)  $\delta$  7.36



(s, 1H), 7.35-7.29 (m, 1H), 7.14-6.94 (m, 7H), 6.77 (d,  $J = 8.6$  Hz, 2H), 5.11-4.78 (m, 2H), 4.24 (dd,  $J = 70.6, 15.9$  Hz, 3H), 4.13-4.06 (m, 2H), 3.73 (s, 3H), 3.37 (s, 1H), 2.36 (s, 3H), 1.17 (t,  $J = 7.1$  Hz, 3H);  $^{13}\text{C}$  NMR (100 MHz,  $\text{CD}_3\text{OD}$ )  $\delta$  167.57, 167.34, 158.96, 150.50, 147.92, 139.19, 137.67, 135.63, 130.74, 129.28, 128.32, 127.43, 126.87, 125.33, 125.27, 125.22, 117.68, 116.58, 113.84, 110.29, 67.95 (q,  $J = 32.3$  Hz), 60.59, 56.82, 54.28, 46.25, 30.03, 18.45, 12.99;  $^{19}\text{F}$  NMR (376 MHz,  $\text{CD}_3\text{OD}$ )  $\delta$  -82.01; HRMS (ESI<sup>+</sup>): calcd for  $\text{C}_{32}\text{H}_{28}\text{ClF}_3\text{N}_2\text{O}_6$   $[\text{M}+\text{Na}]^+ = 651.1486$ , found = 651.1486.

**(1*S*,9*bR*,*E*)-8-chloro-2-(1-ethoxy-1-oxo-3-(*o*-tolyl)propan-2-ylidene)-4-oxo-9b-(trifluoromethyl)-1,4,5,9b-tetrahydro-2H-azeto[1,2-*c*]quinazoline-1-carboxylic acid (5c)**

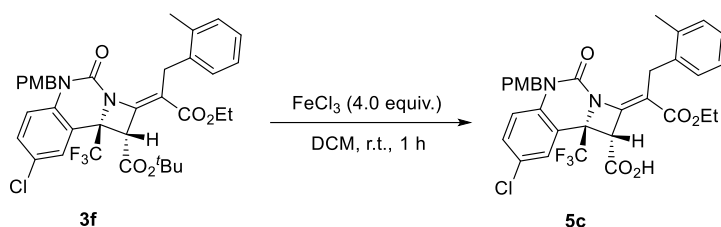

**5c** (>20:1 *dr*, 44.3 mg, 87% yield) was gained under similar condition of **5b**, by used  $\text{FeCl}_3$  (64.8 mg, 0.4 mmol). As a white solid; m.p. = 173-176 °C;  $[\alpha]_D^{25} = -84.6$  (c 0.8,  $\text{CHCl}_3$ );  $^1\text{H}$  NMR (400 MHz,  $\text{CD}_3\text{OD}$ )  $\delta$  7.40 (dd,  $J = 8.7, 2.3$  Hz, 1H), 7.31 (s, 1H), 7.10-6.98 (m, 4H), 6.94 (d,  $J = 8.6$  Hz, 1H), 4.76 (s, 1H), 4.21 (dd,  $J = 71.2, 15.6$  Hz, 1H), 4.09-4.03 (m, 2H), 2.35 (s, 3H), 1.12 (t,  $J = 7.1$  Hz, 3H);  $^{13}\text{C}$  NMR (100 MHz,  $\text{CD}_3\text{OD}$ )  $\delta$  167.63, 167.29, 150.45, 148.04, 138.90, 137.19, 135.64, 131.10, 129.22, 127.76, 127.27, 125.68, 125.23, 116.89, 114.01, 110.84, 69.30 (q,  $J = 32.2$  Hz), 60.50, 57.01, 30.45, 30.17, 18.44, 12.94;  $^{19}\text{F}$  NMR (376 MHz,  $\text{CD}_3\text{OD}$ )  $\delta$  -82.82. HRMS (ESI<sup>+</sup>): calcd for  $\text{C}_{24}\text{H}_{20}\text{ClF}_3\text{N}_2\text{O}_5$   $[\text{M}+\text{Na}]^+ = 509.1091$ , found = 509.1093.

**tert-butyl (1*S*,9*bR*,*E*)-8-chloro-2-(1-methoxy-1-oxo-3-(*o*-tolyl)propan-2-ylidene)-5-(4-methoxybenzyl)-4-oxo-9b-(trifluoromethyl)-1,4,5,9b-tetrahydro-2H-azeto[1,2-*c*]quinazoline-1-carboxylate (5d)**

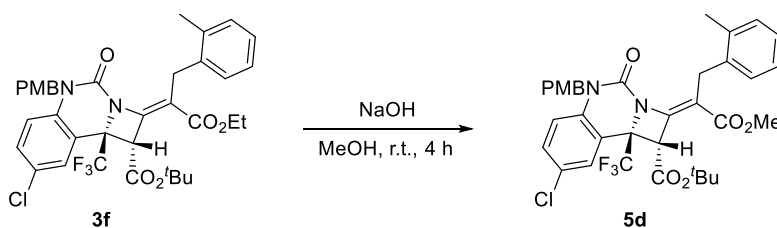

A round bottle flask with a magnetic stirring bar were added **3f** (>20:1 *dr*, >99% *ee*, 68.5 mg, 0.1 mmol), and MeOH (1 mL), NaOH (32 mg, 0.2 mmol), after stired for 4 h at ambient temperature, H<sub>2</sub>O (3 mL) was added, methanol was removed by evaporation under reduced pressure, the mixture was extracted with DCM (3 mL × 3), dried over Na<sub>2</sub>SO<sub>4</sub>, the solvent was removed by evaporation under reduced pressure, and the residue was purified by column chromatography on silica gel (petroleum ether/ethyl acetate = 10:1) to give **5d** (>20:1*dr*, 46.5 mg, 80% yield) as a white solid; m.p. = 115-117 °C; [ $\alpha$ ]<sup>25</sup><sub>D</sub> = -95.8 (c 0.8, CHCl<sub>3</sub>); <sup>1</sup>H NMR (400 MHz, CDCl<sub>3</sub>)  $\delta$  7.25 (s, 1H), 7.22 (dd, *J* = 8.8, 2.4 Hz, 1H), 7.16-7.05 (m, 4H), 6.98 (d, *J* = 8.6 Hz, 2H), 6.81 (d, *J* = 8.8 Hz, 1H), 6.77 (d, *J* = 8.7 Hz, 2H), 4.93 (dd, *J* = 107.3, 16.3 Hz, 2H), 4.66 (s, 1H), 4.25 (dd, *J* = 86.0, 15.8 Hz, 2H), 3.77 (s, 3H), 3.64 (s, 3H), 2.39 (s, 3H), 1.28 (s, 9H); <sup>13</sup>C NMR (100 MHz, CDCl<sub>3</sub>)  $\delta$  168.11, 164.89, 158.96, 149.11, 148.75, 137.62, 130.85, 128.35, 127.56, 127.36, 126.19, 117.02, 116.19, 114.36, 109.19, 83.14, 68.66 (q, *J* = 31.9 Hz), 58.72, 55.27, 51.68, 46.65, 27.66, 14.07; <sup>19</sup>F NMR (376 MHz, CDCl<sub>3</sub>)  $\delta$  -81.04; HRMS (ESI<sup>+</sup>): calcd for C<sub>35</sub>H<sub>34</sub>ClF<sub>3</sub>N<sub>2</sub>O<sub>6</sub> [M+H]<sup>+</sup> = 671.2136, found = 671.2133.

**(S,Z)-2-((R)-6-chloro-1-(4-methoxybenzyl)-2-oxo-4-(trifluoromethyl)-1,2,3,4-tetrahydroquinazolin-4-yl)-5-ethoxy-4-(2-methylbenzyl)-5-oxopent-3-enoic acid (5e)**

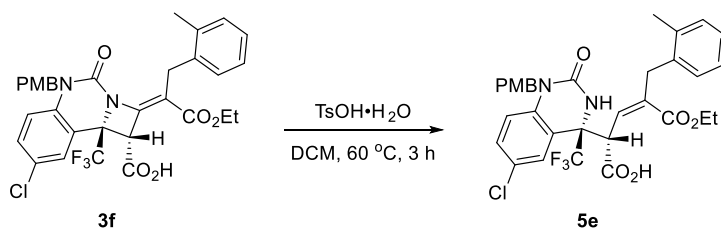

Under nitrogen atmosphere, a round bottle flask with a magnetic stirring bar were added **3f** (>20:1 *dr*, >99% *ee*, 68.5 mg, 0.1 mmol), and DCE (2 mL), TsOH·H<sub>2</sub>O (5.2 mg, 0.02 mmol), after stired for 3 h at 60 °C. H<sub>2</sub>O (3 mL) was added, the mixture was extracted with DCM (3 mL × 3), dried over Na<sub>2</sub>SO<sub>4</sub>, and the solvent was removed under reduced pressure, the residue was purified by column chromatography on silica gel (petroleum ether/ethyl acetate = 2 : 1) to give **5e** (>20:1 *dr*, 94% yield, 59.2 mg). <sup>1</sup>H NMR (400 MHz, CD<sub>3</sub>OD)  $\delta$  7.35 (s, 1H), 7.32-7.21 (m, 1H), 7.18-6.98 (m, 4H), 6.97-6.87 (m, 3H), 6.81-6.67 (m, 2H), 4.98-4.80 (m, 6H), 4.23 (dd, *J* = 69.5, 16.0 Hz, 2H), 4.14-3.98 (m, 1H), 3.68 (s, 3H), 2.32 (s, 3H), 1.13 (t, *J* = 7.0 Hz, 3H); <sup>13</sup>C NMR (100 MHz, CD<sub>3</sub>OD)  $\delta$  171.51, 171.28, 162.90, 154.44, 151.86, 143.14, 141.60, 139.58, 134.68, 133.23,

132.26, 131.38, 131.36, 130.81, 129.27, 129.17, 121.62, 120.51, 117.78, 114.24, 71.89 (q,  $J = 32.5$  Hz), 64.53, 60.76, 58.22, 50.17, 33.99, 22.42, 16.94;  $^{19}\text{F}$  NMR (376 MHz,  $\text{CD}_3\text{OD}$ )  $\delta$  -82.49.

**1-(tert-butyl) 3'-ethyl (1R,3'S,9bS)-8-chloro-5-(4-methoxybenzyl)-3'-(2-methylbenzyl)-4-oxo-9b-(trifluoromethyl)-1,4,5,9b-tetrahydrospiro[azeto[1,2-c]quinazoline-2,2'-oxirane]-1,3'-dicarboxylate (5f)**

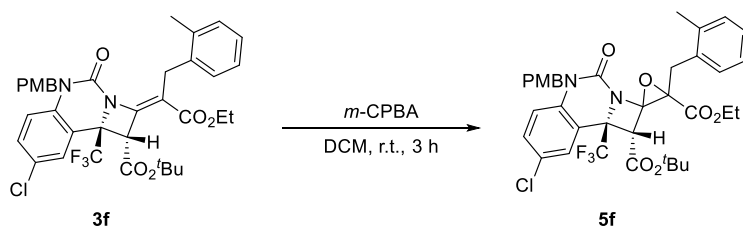

A round bottle flask with a magnetic stirring bar were added **3f** (>20:1 *dr*, >99% *ee*, 68.5 mg, 0.1 mmol), and DCE (2 mL), *m*-CPBA (121.8 mg, 0.6 mmol), after stired for 3 h at room temperature.  $\text{H}_2\text{O}$  (3 mL) was added, the mixture was extracted with DCM (3 mL  $\times$  3), dried over  $\text{Na}_2\text{SO}_4$ , and the solvent was removed under reduced pressure, the residue was purified by column chromatography on silica gel (petroleum ether/ethyl acetate = 10 : 1) to give **5f** (>20:1 *dr*, 96% *ee*, 83% yield, 59.1 mg). *m.p.* = 91-96  $^\circ\text{C}$ ;  $[\alpha]_D^{25} = -103.1$  (c 0.8,  $\text{CHCl}_3$ );  $^1\text{H}$  NMR (400 MHz, Acetone- $d_6$ )  $\delta$  7.55-7.41 (m, 2H), 7.32-7.10 (m, 7H), 6.93 (d,  $J = 8.7$  Hz, 2H), 5.13 (dd,  $J = 37.1, 16.4$  Hz, 2H), 4.20 (s, 1H), 4.07 (dd,  $J = 201.9, 16.2$  Hz, 2H), 4.11-4.02 (m, 2H), 3.81 (s, 3H), 2.43 (s, 3H), 1.33 (s, 9H), 1.08 (t,  $J = 7.1$  Hz, 3H);  $^{13}\text{C}$  NMR (100 MHz, Acetone- $d_6$ )  $\delta$  166.70, 164.53, 159.14, 149.38, 138.10, 136.53, 135.72, 131.20, 130.01, 128.03, 127.93, 127.72, 126.35, 125.72, 117.96, 116.06, 114.09, 84.15, 83.96, 66.34, 62.01, 57.03, 54.62, 45.65, 31.79, 26.91, 19.27, 12.96;  $^{19}\text{F}$  NMR (376 MHz, Acetone- $d_6$ )  $\delta$  -82.06; The *ee* value was 96%,  $t_R$  (major) = 11.3 min,  $t_R$  (minor) = 15.0 min (Chiralcel IA,  $\lambda = 254$  nm, hexane/2-propanol = 90/10, flow rate = 0.5 mL/min).

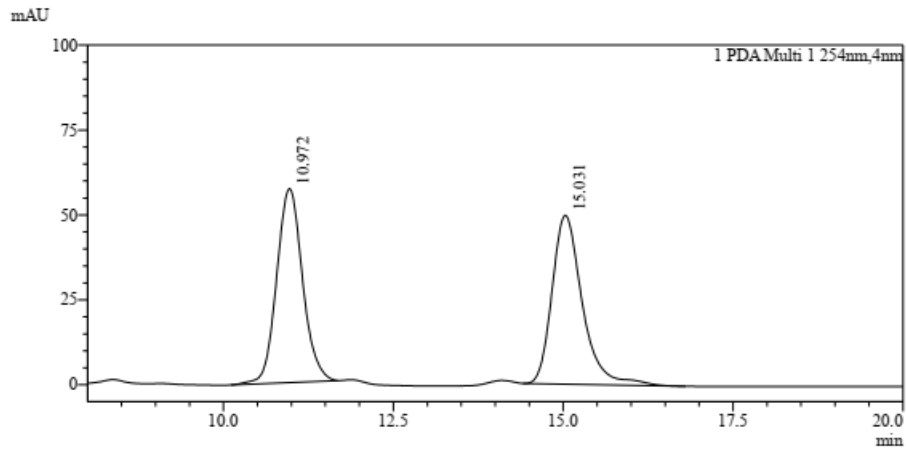

Peak Table

| Peak# | Ret. Time | Height | Height% | Area    | Area%   |
|-------|-----------|--------|---------|---------|---------|
| 1     | 10.972    | 57073  | 53.447  | 1513798 | 49.515  |
| 2     | 15.031    | 49712  | 46.553  | 1543467 | 50.485  |
| Total |           | 106785 | 100.000 | 3057265 | 100.000 |

### Racemic 5f

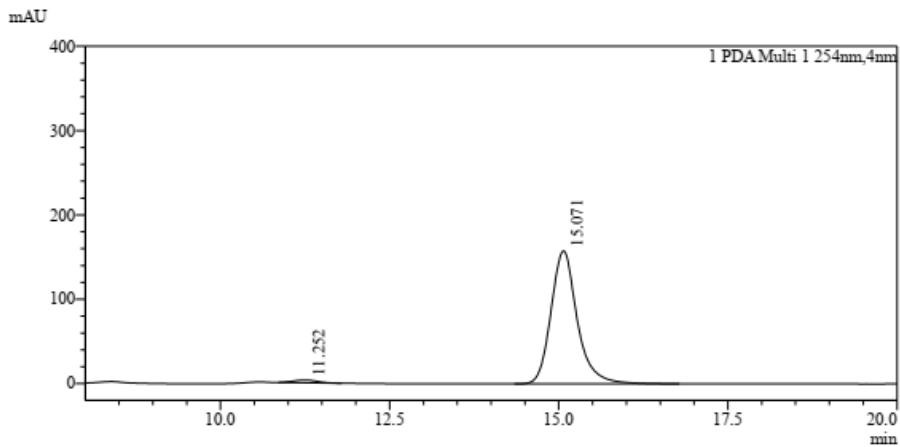

Peak Table

| Peak# | Ret. Time | Height | Height% | Area    | Area%   |
|-------|-----------|--------|---------|---------|---------|
| 1     | 11.252    | 3179   | 1.976   | 78645   | 1.811   |
| 2     | 15.071    | 157699 | 98.024  | 4263187 | 98.189  |
| Total |           | 160878 | 100.000 | 4341832 | 100.000 |

### Enantiomerically enriched 5f

## 7. Determination of absolute configuration of products

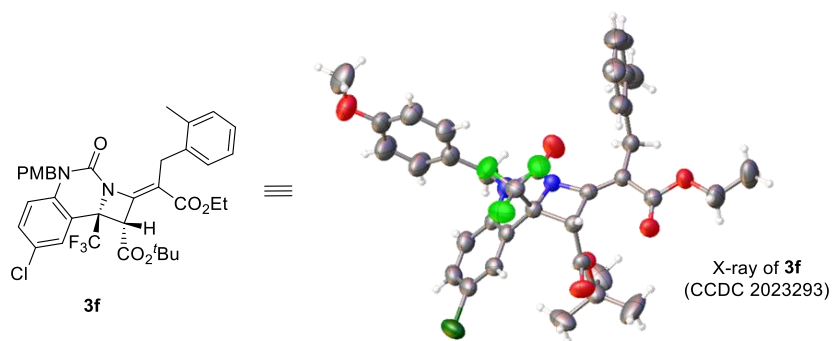

**Figure S2.** X-ray structure of **3f**.

**Table S5.** Crystal data and structure refinement for **3f**.

|                                         |                                                                                |
|-----------------------------------------|--------------------------------------------------------------------------------|
| Identification code                     | wtl-zs-1429                                                                    |
| Empirical formula                       | C <sub>36</sub> H <sub>36</sub> ClF <sub>3</sub> N <sub>2</sub> O <sub>6</sub> |
| Formula weight                          | 685.12                                                                         |
| Temperature/K                           | 294.5(7)                                                                       |
| Crystal system                          | monoclinic                                                                     |
| Space group                             | P21                                                                            |
| a/Å                                     | 8.08272(16)                                                                    |
| b/Å                                     | 9.84747(16)                                                                    |
| c/Å                                     | 21.8501(4)                                                                     |
| $\alpha$ /°                             | 90                                                                             |
| $\beta$ /°                              | 95.1500(19)                                                                    |
| $\gamma$ /°                             | 90                                                                             |
| Volume/Å <sup>3</sup>                   | 1732.13(6)                                                                     |
| Z                                       | 2                                                                              |
| $\rho$ <sub>calc</sub> /cm <sup>3</sup> | 1.314                                                                          |
| $\mu$ /mm <sup>-1</sup>                 | 1.520                                                                          |
| F(000)                                  | 716.0                                                                          |
| Crystal size/mm <sup>3</sup>            | 0.5 × 0.3 × 0.1                                                                |
| Radiation                               | CuK $\alpha$ ( $\lambda$ = 1.54184)                                            |
| 2 $\theta$ range for data collection/°  | 8.126 to 143.836                                                               |
| Index ranges                            | -6 ≤ h ≤ 9, -12 ≤ k ≤ 12, -26 ≤ l ≤ 24                                         |
| Reflections collected                   | 11907                                                                          |
| Independent reflections                 | 6345 [Rint = 0.0424, Rsigma = 0.0539]                                          |
| Data/restraints/parameters              | 6345/1/439                                                                     |

|                                             |                           |
|---------------------------------------------|---------------------------|
| Goodness-of-fit on F2                       | 1.076                     |
| Final R indexes [ $I \geq 2\sigma(I)$ ]     | R1 = 0.0627, wR2 = 0.1616 |
| Final R indexes [all data]                  | R1 = 0.0681, wR2 = 0.1711 |
| Largest diff. peak/hole / e Å <sup>-3</sup> | 0.28/-0.29                |
| Flack parameter                             | 0.003(17)                 |

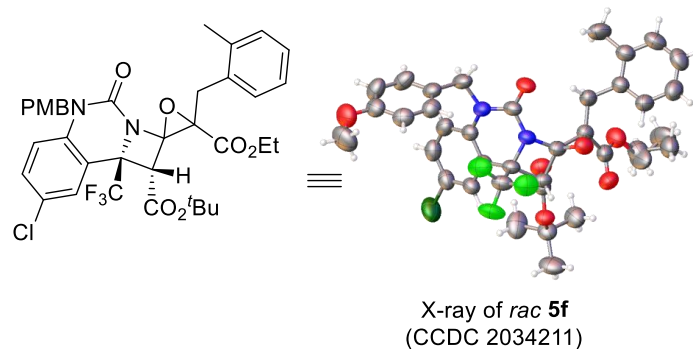

**Figure S3.** X-ray structure of racemic **5f**.

**Table S6.** Crystal data and structure refinement for **5f**.

|                                                |                                                                                |
|------------------------------------------------|--------------------------------------------------------------------------------|
| Identification code                            | wtl-zs-4-O                                                                     |
| Empirical formula                              | C <sub>36</sub> H <sub>36</sub> ClF <sub>3</sub> N <sub>2</sub> O <sub>7</sub> |
| Formula weight                                 | 701.12                                                                         |
| Temperature/K                                  | 295.2(4)                                                                       |
| Crystal system                                 | triclinic                                                                      |
| Space group                                    | P-1                                                                            |
| a/Å                                            | 12.0254(7)                                                                     |
| b/Å                                            | 12.2134(8)                                                                     |
| c/Å                                            | 13.7083(7)                                                                     |
| $\alpha/^\circ$                                | 104.703(5)                                                                     |
| $\beta/^\circ$                                 | 91.687(5)                                                                      |
| $\gamma/^\circ$                                | 116.424(6)                                                                     |
| Volume/Å <sup>3</sup>                          | 1720.23(19)                                                                    |
| Z                                              | 2                                                                              |
| $\rho_{\text{calc}}/\text{cm}^3$               | 1.354                                                                          |
| $\mu/\text{mm}^{-1}$                           | 1.566                                                                          |
| F(000)                                         | 732.0                                                                          |
| Crystal size/mm <sup>3</sup>                   | 0.3 × 0.2 × 0.1                                                                |
| Radiation                                      | CuK $\alpha$ ( $\lambda = 1.54184$ )                                           |
| 2 $\theta$ range for data collection/ $^\circ$ | 6.758 to 143.03                                                                |
| Index ranges                                   | -13 ≤ h ≤ 14, -14 ≤ k ≤ 14, -16 ≤ l ≤ 16                                       |

|                                             |                                       |
|---------------------------------------------|---------------------------------------|
| Reflections collected                       | 18459                                 |
| Independent reflections                     | 6584 [Rint = 0.0372, Rsigma = 0.0315] |
| Data/restraints/parameters                  | 6584/0/469                            |
| Goodness-of-fit on F2                       | 1.035                                 |
| Final R indexes [I>=2σ (I)]                 | R1 = 0.0575, wR2 = 0.1629             |
| Final R indexes [all data]                  | R1 = 0.0695, wR2 = 0.1793             |
| Largest diff. peak/hole / e Å <sup>-3</sup> | 0.25/-0.25                            |

## 8. Mechanistic studies

### A. Reaction catalyzed by different phosphonium salts

**Table S7.** Reaction catalyzed by different phosphonium salts<sup>[a]</sup>

| Entry            | P           | yield (%) <sup>[b]</sup> | ee (%) <sup>[c]</sup> |
|------------------|-------------|--------------------------|-----------------------|
| 1                | <b>P8</b>   | 96                       | >99                   |
| 2                | <b>P8-1</b> | 35                       | 2                     |
| 3                | <b>P8-2</b> | 30                       | 3                     |
| 4 <sup>[d]</sup> | <b>P8</b>   | messy                    | -                     |

Reaction condition: [a] **1a** (0.05 mmol), **2f** (0.055 mmol), **P** (0.0005 mmol) and Cs<sub>2</sub>CO<sub>3</sub> (0.1 mmol) in *n*-octane (0.5 mL) at room temperature for 36 h. All >20:1 *dr*, and *dr* values were analyzed by <sup>1</sup>H NMR spectroscopy. [b] Isolated yields. [c] The ee values were determined by HPLC. [d] Solvent is MeOH.

We also prepared the methylated phosphonium salt catalysts **P8-1** and **P8-2**. When methylated phosphonium salts **P8-1** and **P8-2** was used, the racemic product was

obtained with loss of yield (Table S7, entries 2-3). Of note, when the reaction was performed in methanol, we did not obtain the expected product. These preliminary results indicated the importance of both hydrogen-bonding and ion-pair interactions and steric hindrance provide by phosphonium salt catalysts (Table S7).

## B. Proposed mechanism

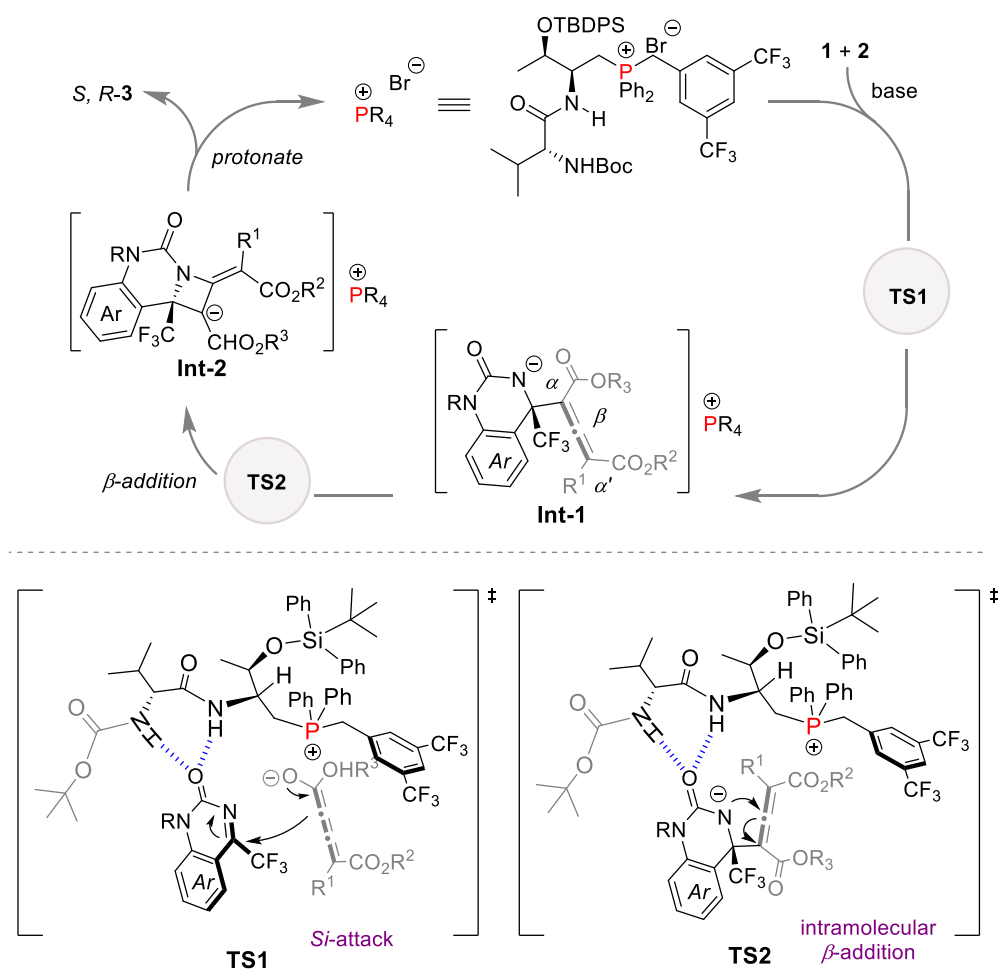

**Figure S4.** Proposed catalytic cycle.



---

## 9. References

- [1] a) J. Pan, J.-H. Wu, H. Zhang, X. Ren, J.-P. Tan, L. Zhu, H.-S. Zhang, C. Jiang, T. Wang, *Angew. Chem. Int. Ed.* **2019**, *58*, 7425-7430; b) H. Zhang, J. He, Y. Chen, C. Zhuang, C. Jiang, K. Xiao, Z. Su, X. Ren, T. Wang, *Angew. Chem. Int. Ed.* **2021**, *60*, 19860-19870.
- [2] L.-J. Yang, S. Li, S. Wang, J. Nie, J.-A. Ma, *J. Org. Chem.* **2014**, *79*, 3547-3558.
- [3] T. Hashimoto, K. Sakata, F. Tamakuni, M. J. Dutton, K. Maruoka, *Nat. Chem.* **2013**, *5*, 240-244.

## 11. NMR spectra

### NMR of **P8-1** (CDCl<sub>3</sub>)

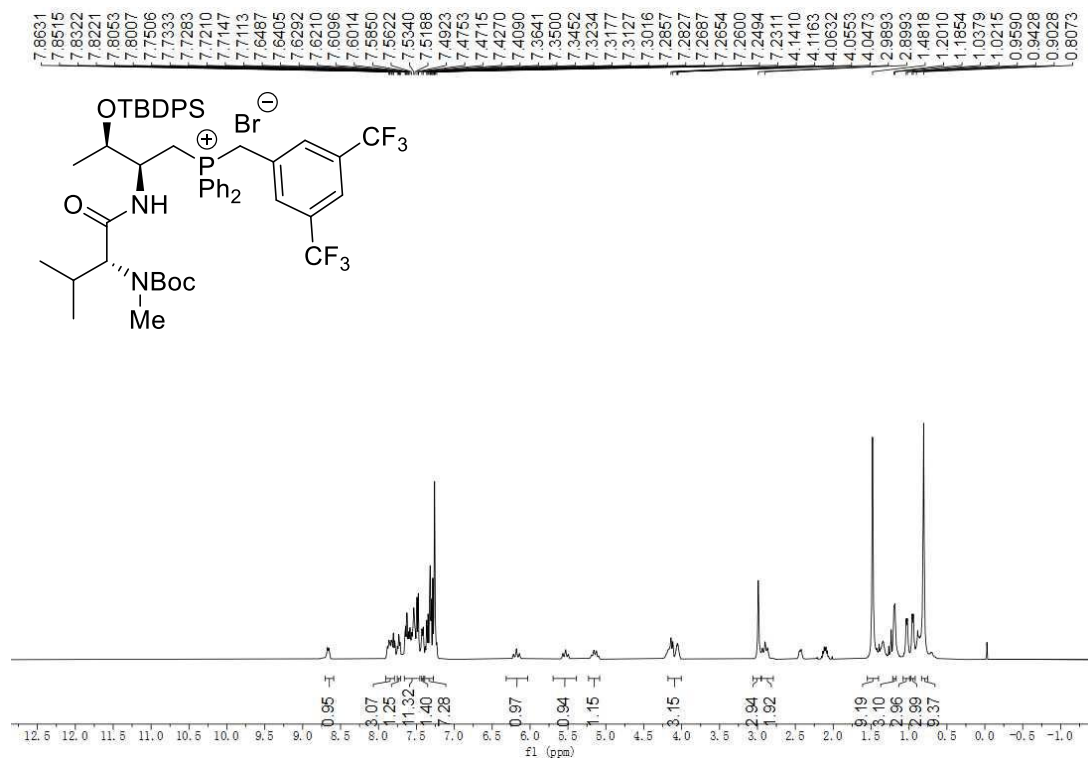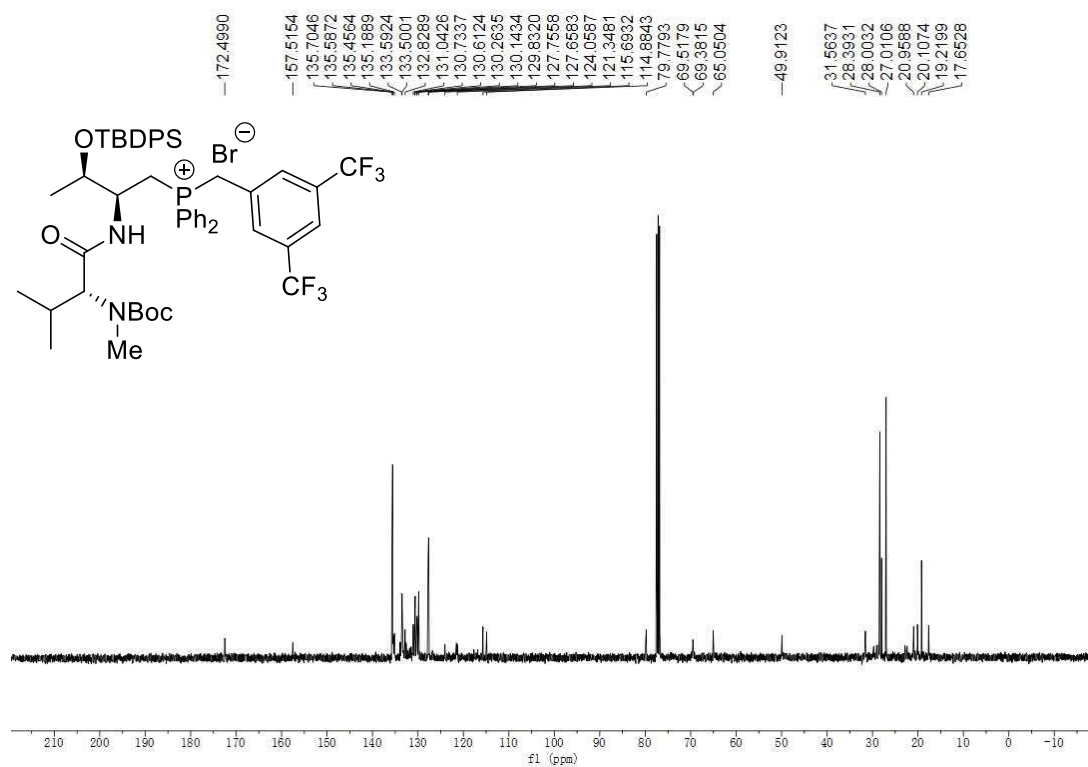

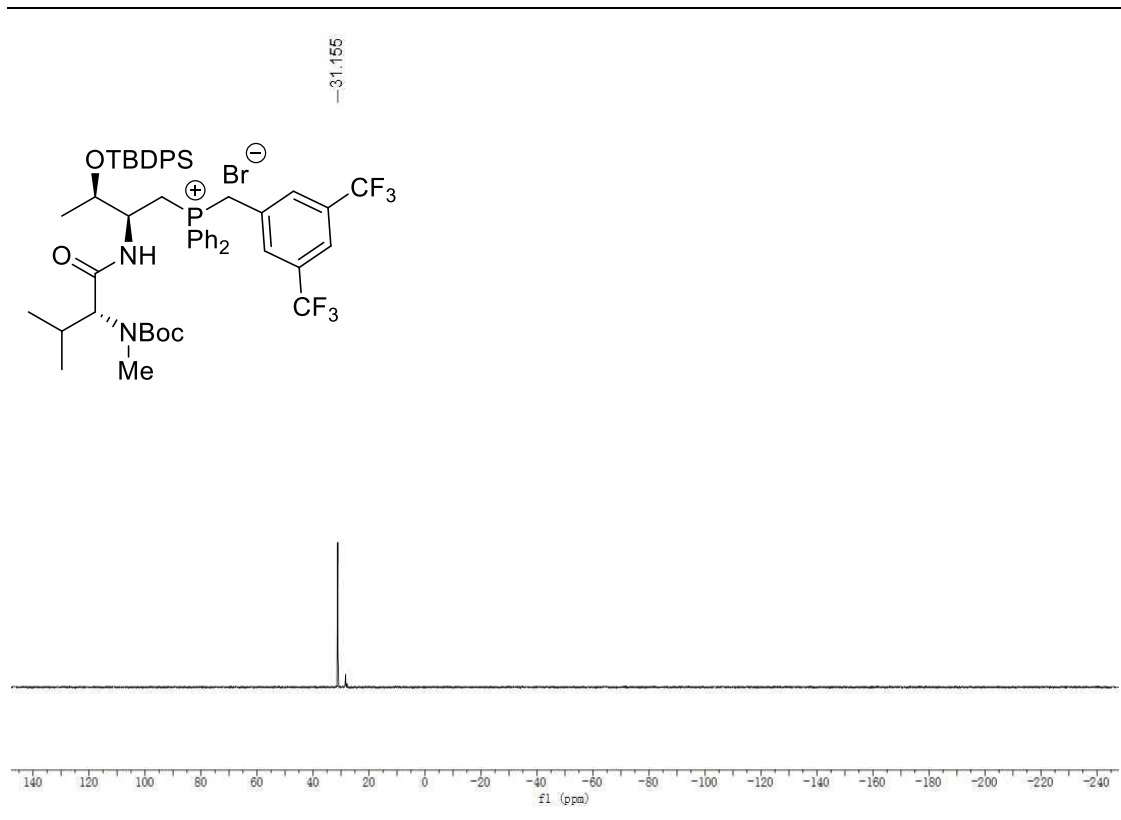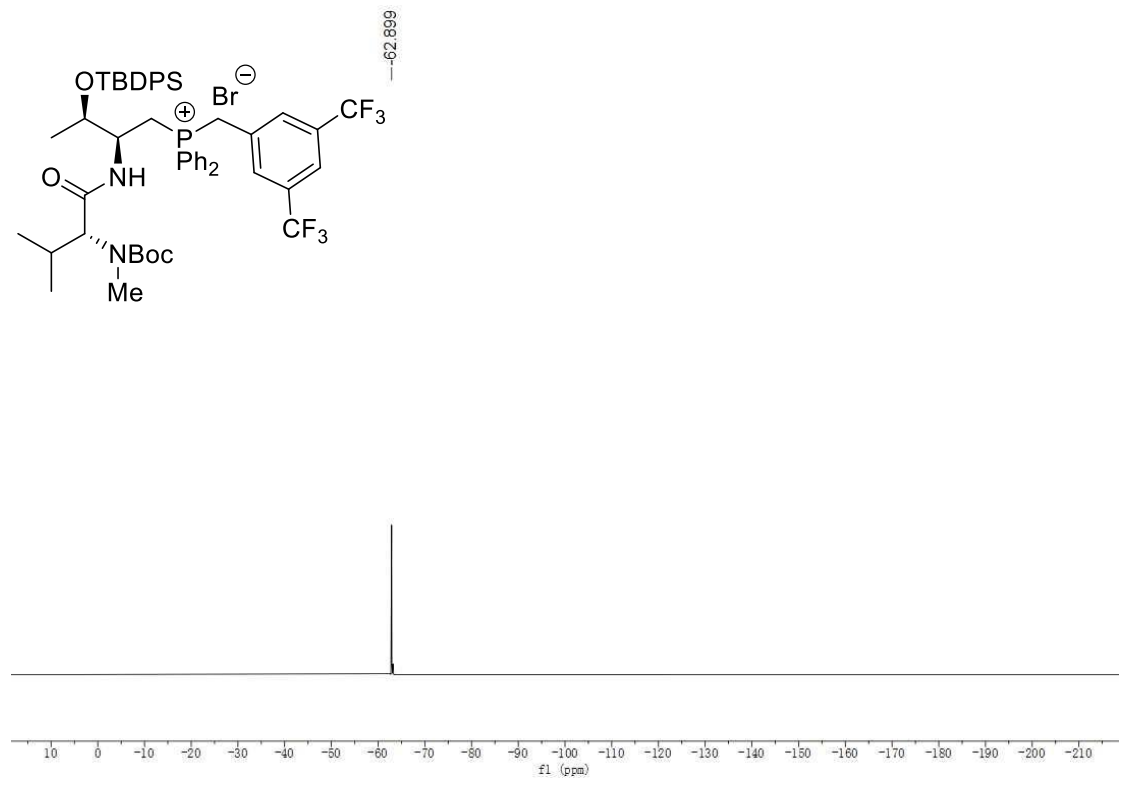

NMR of **P8-2** (CDCl<sub>3</sub>)

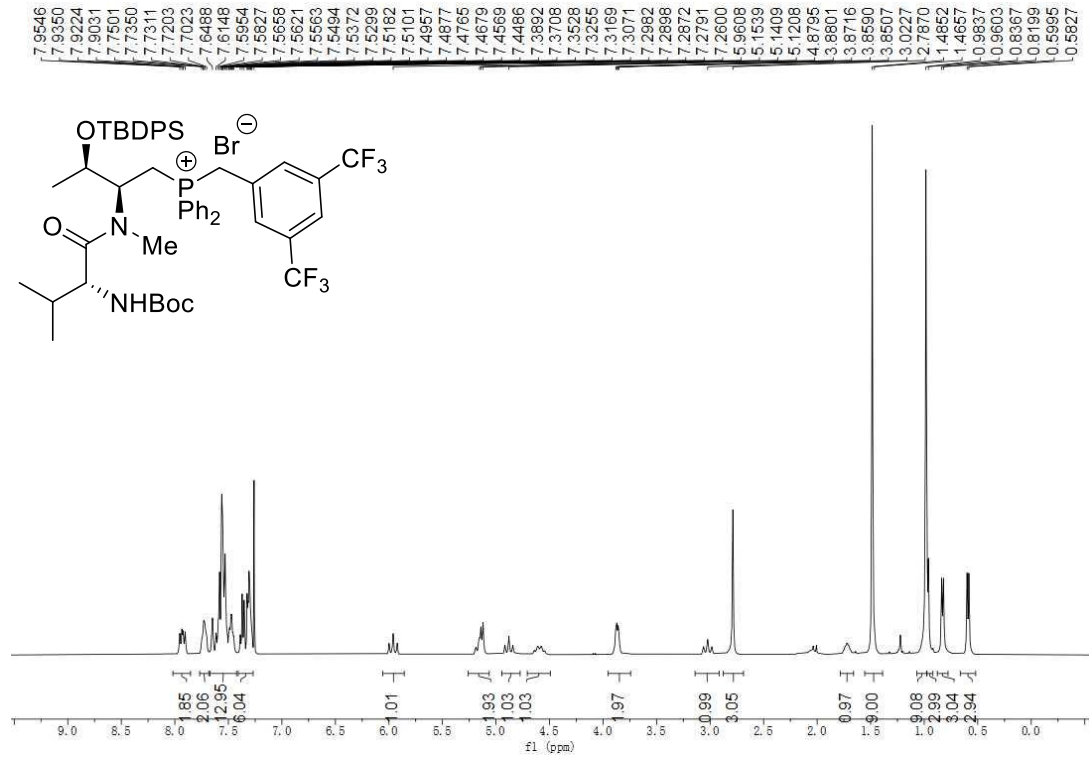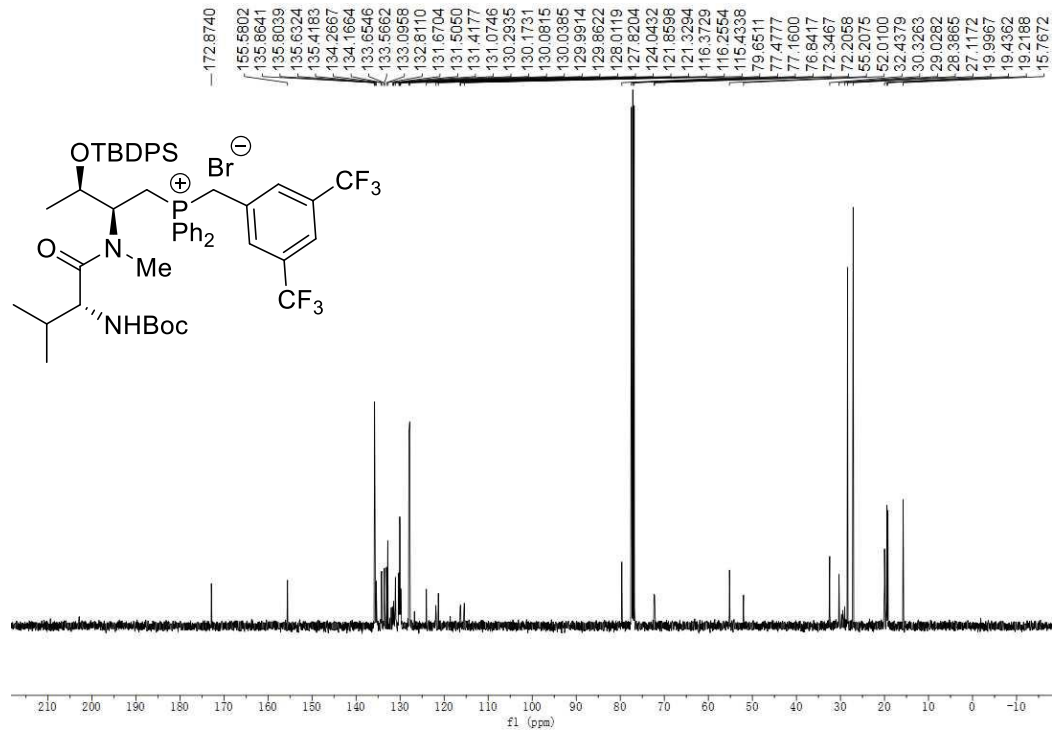

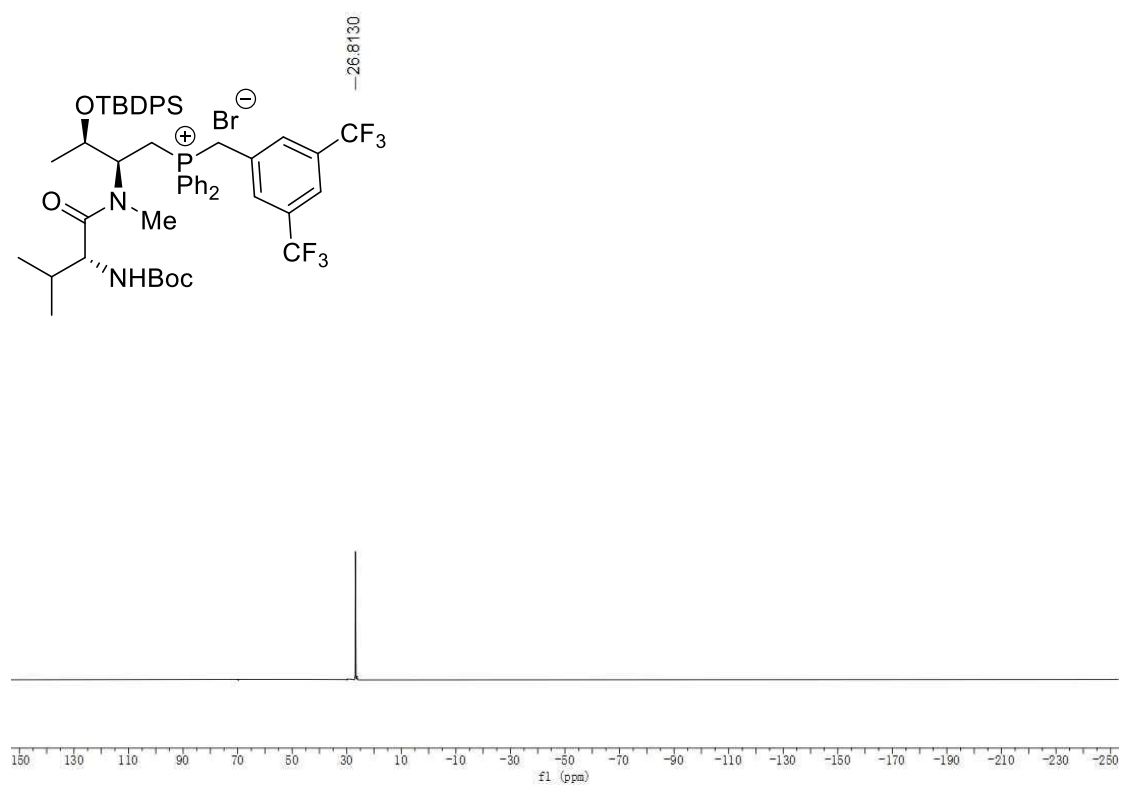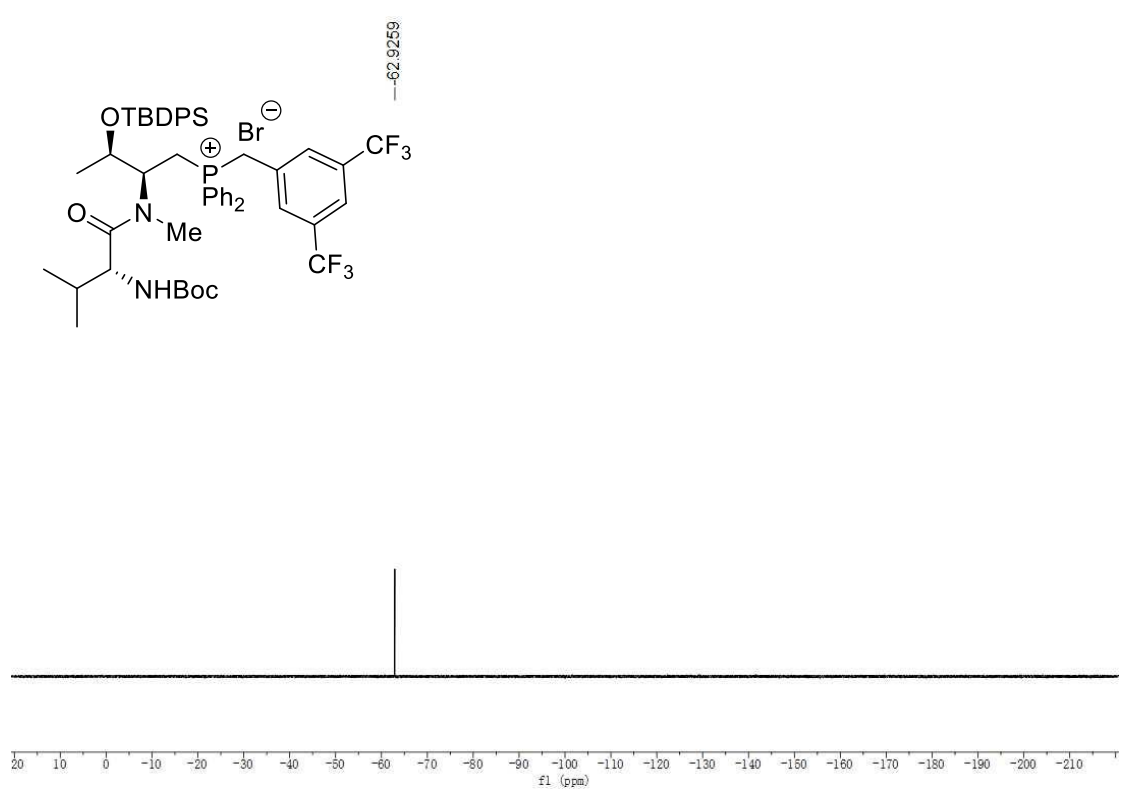

NMR of **2c** (CDCl<sub>3</sub>)

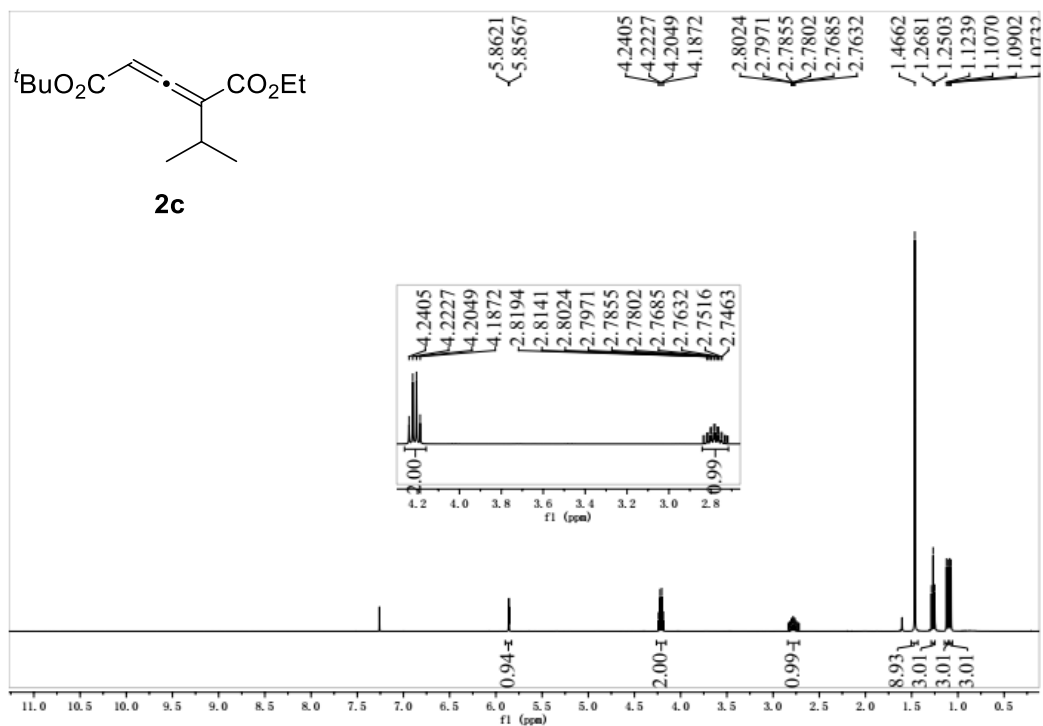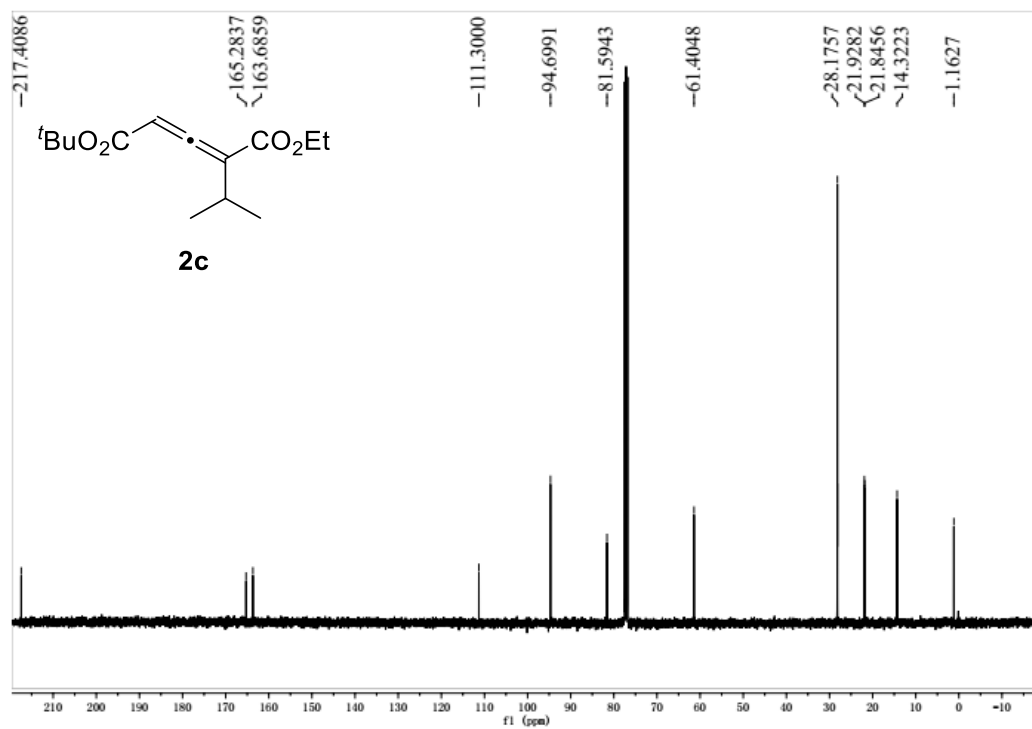

NMR of **2f** (CDCl<sub>3</sub>)

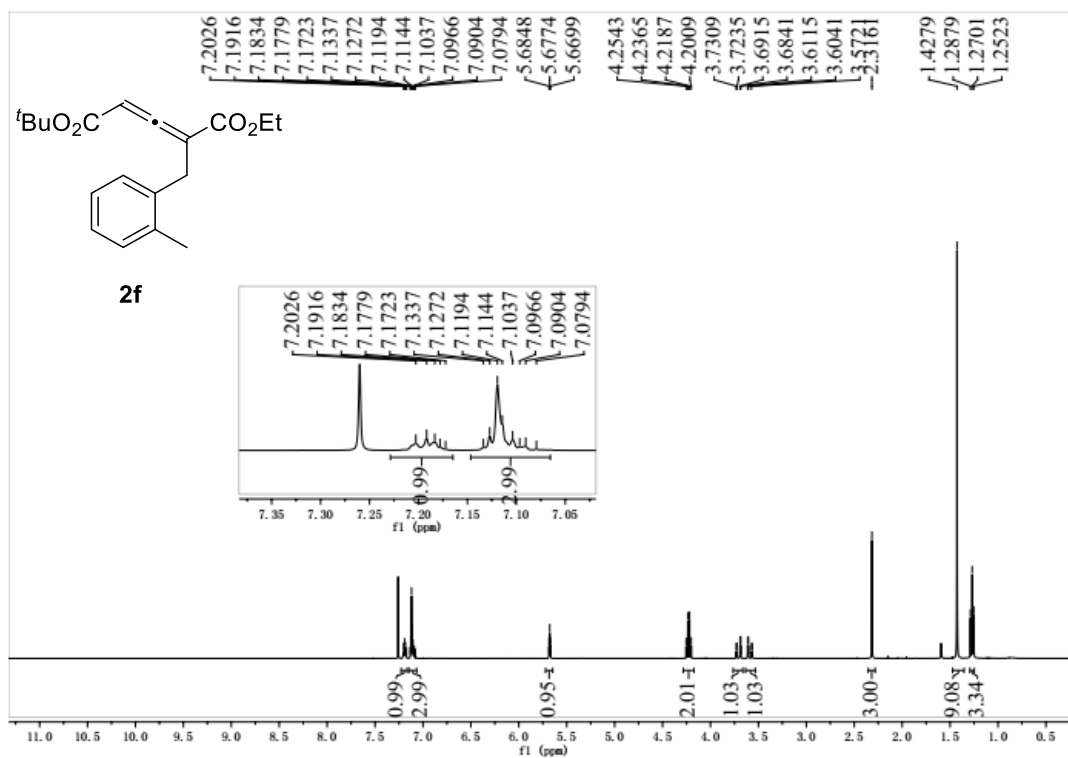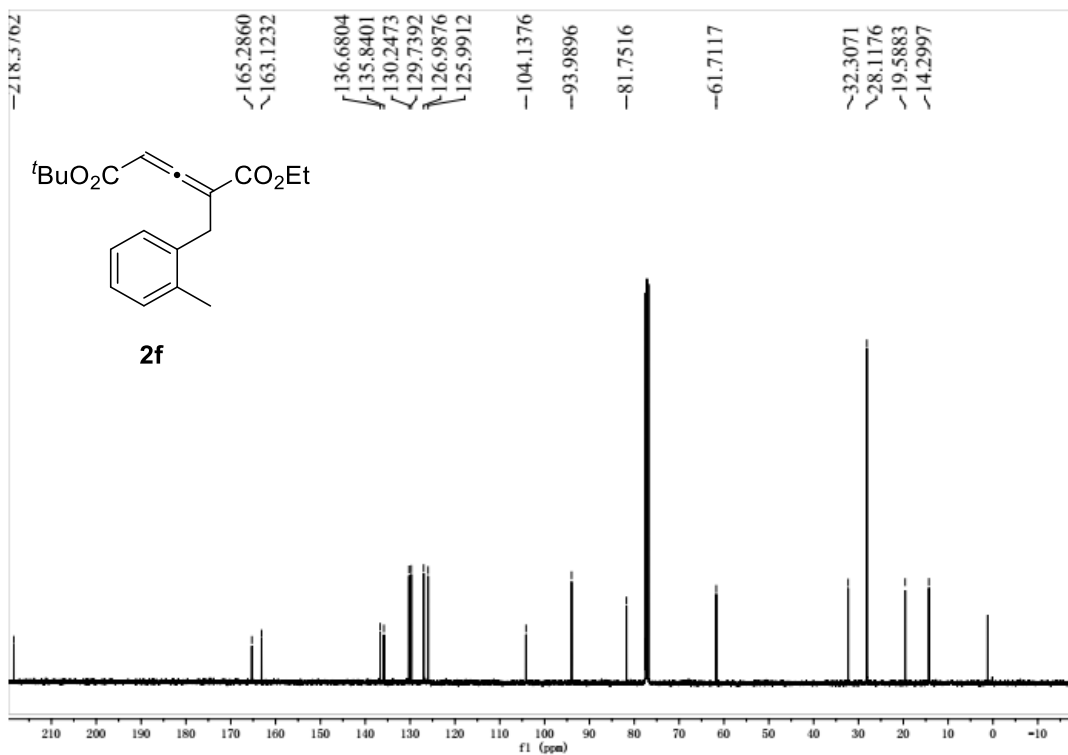

NMR of **2g** (CDCl<sub>3</sub>)

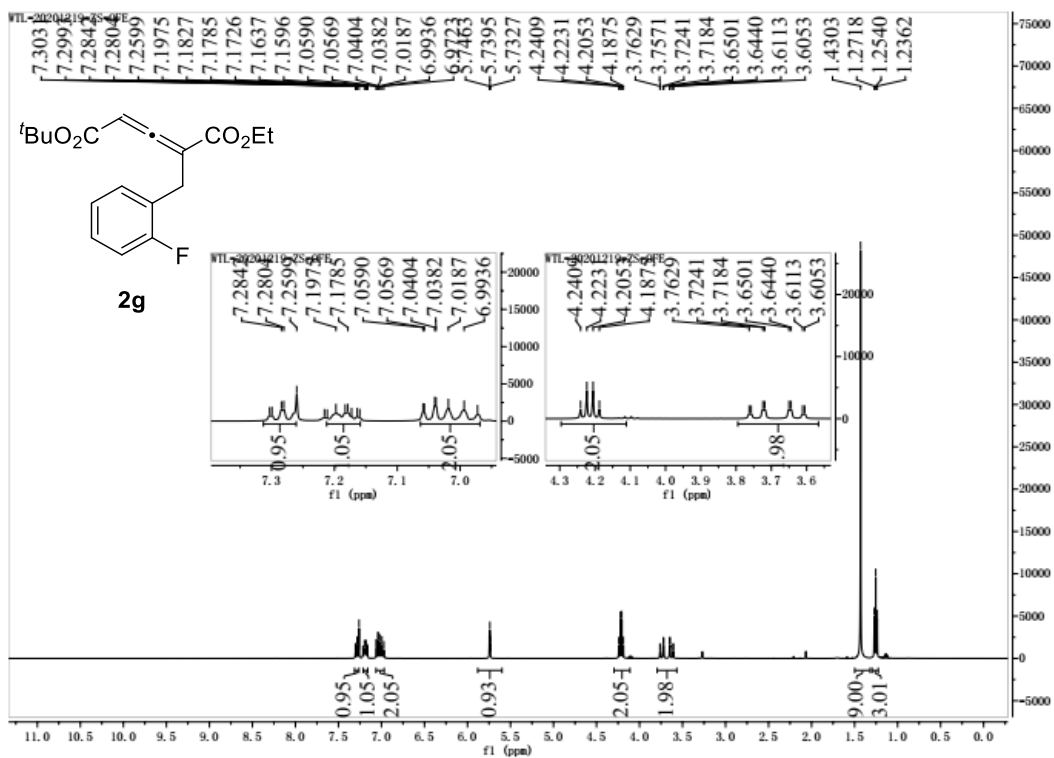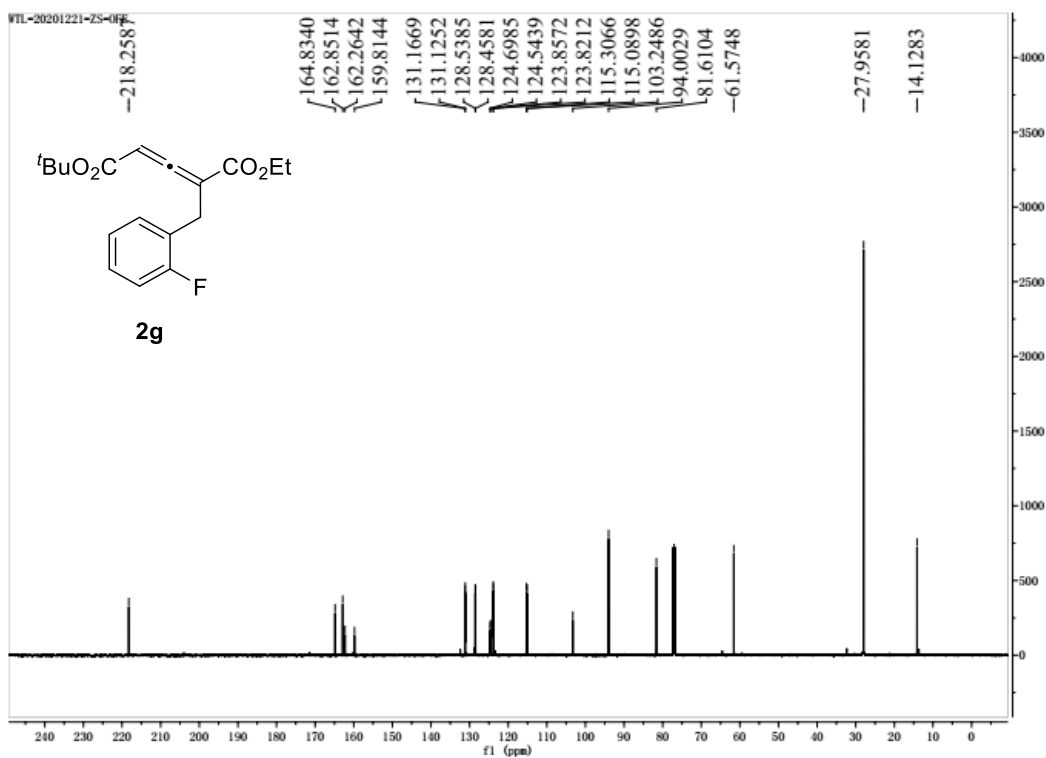



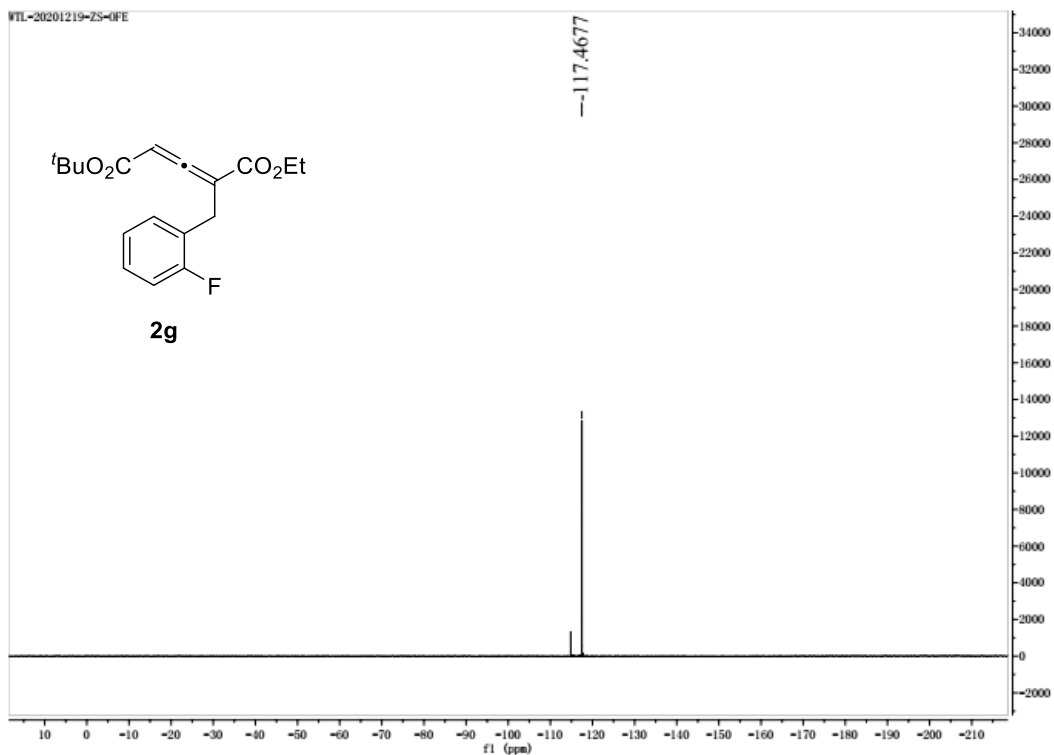

NMR of **2h** (CDCl<sub>3</sub>)

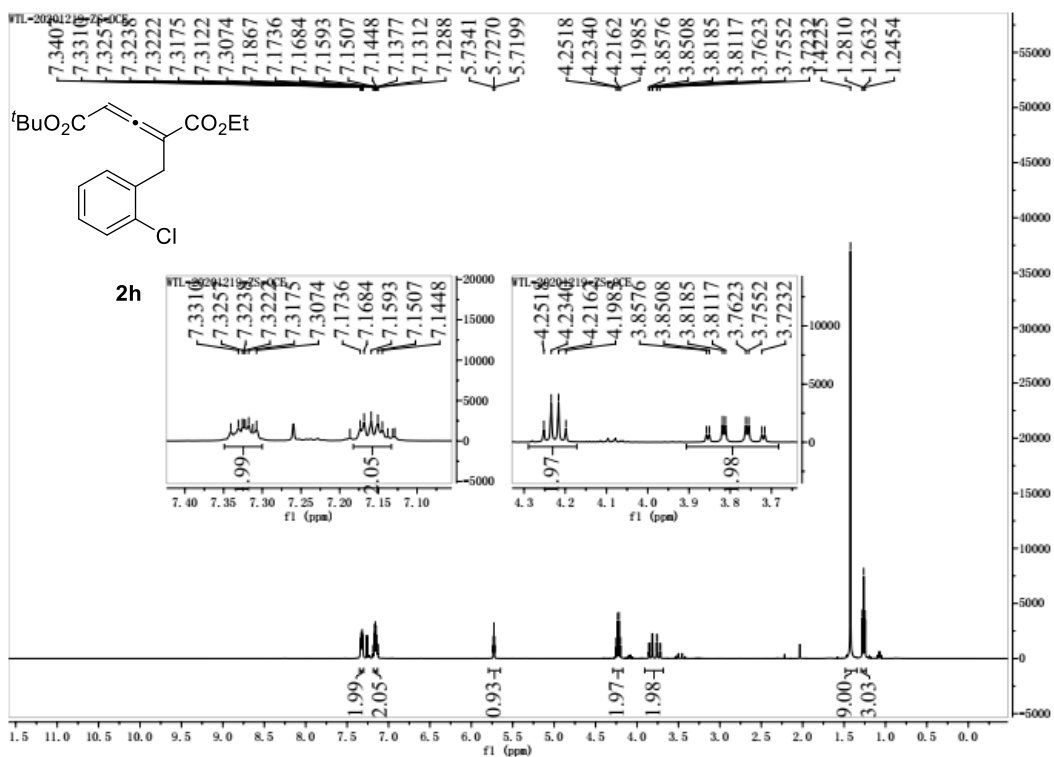

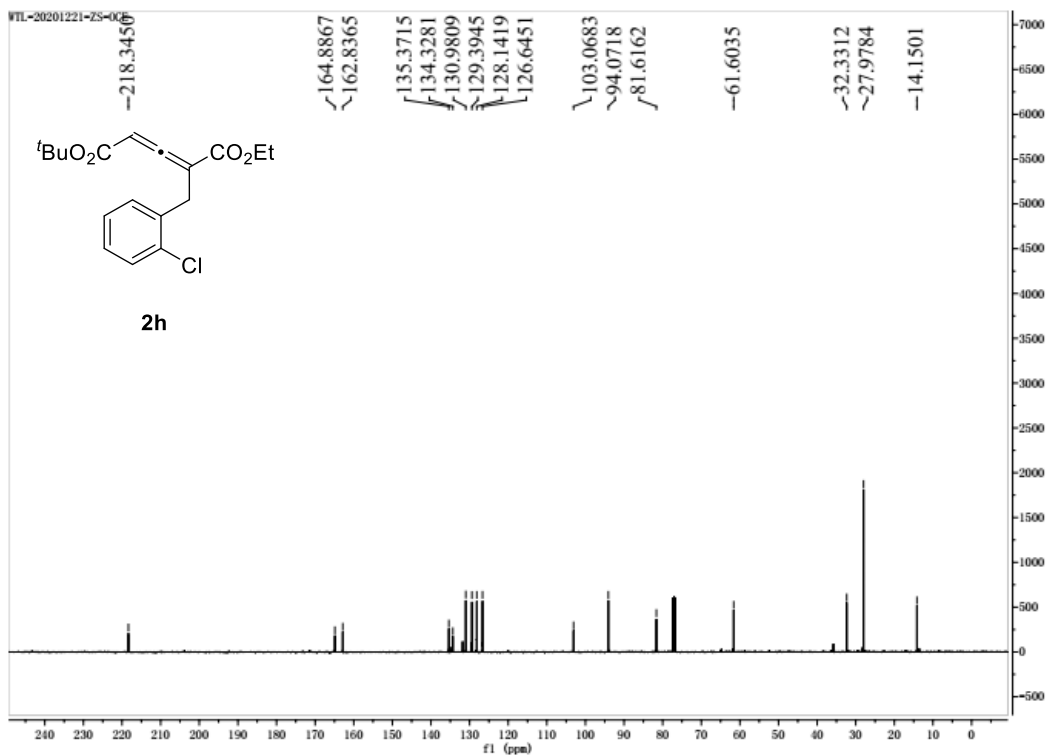

NMR of **2i** (CDCl<sub>3</sub>)

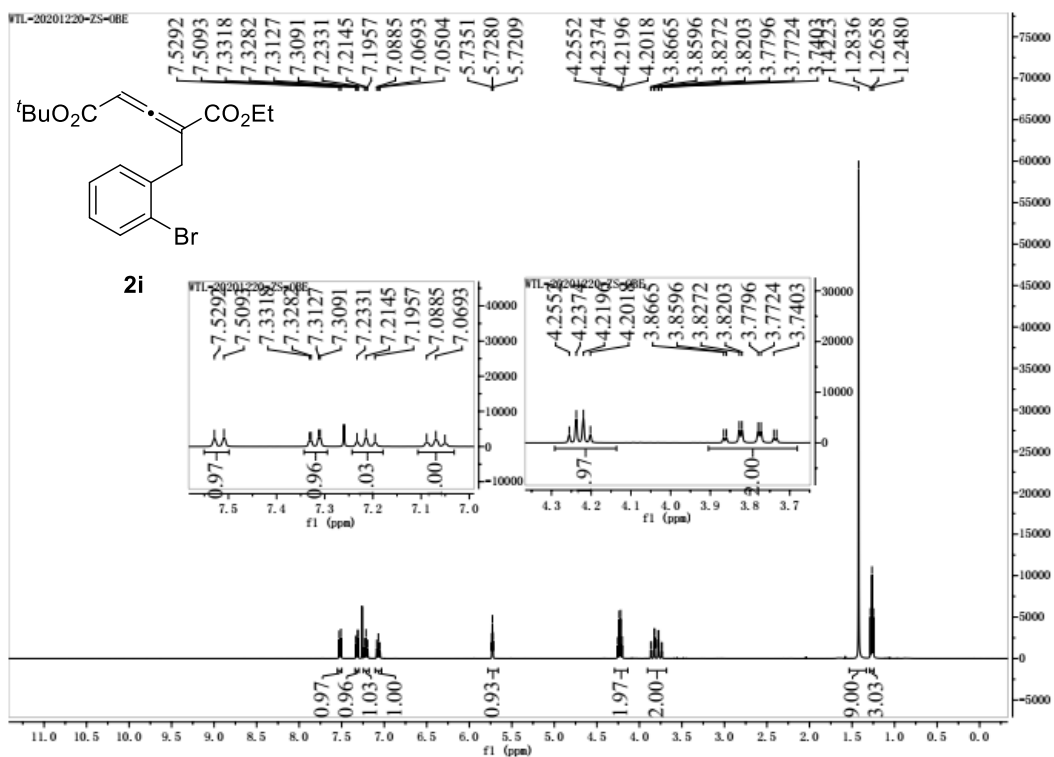

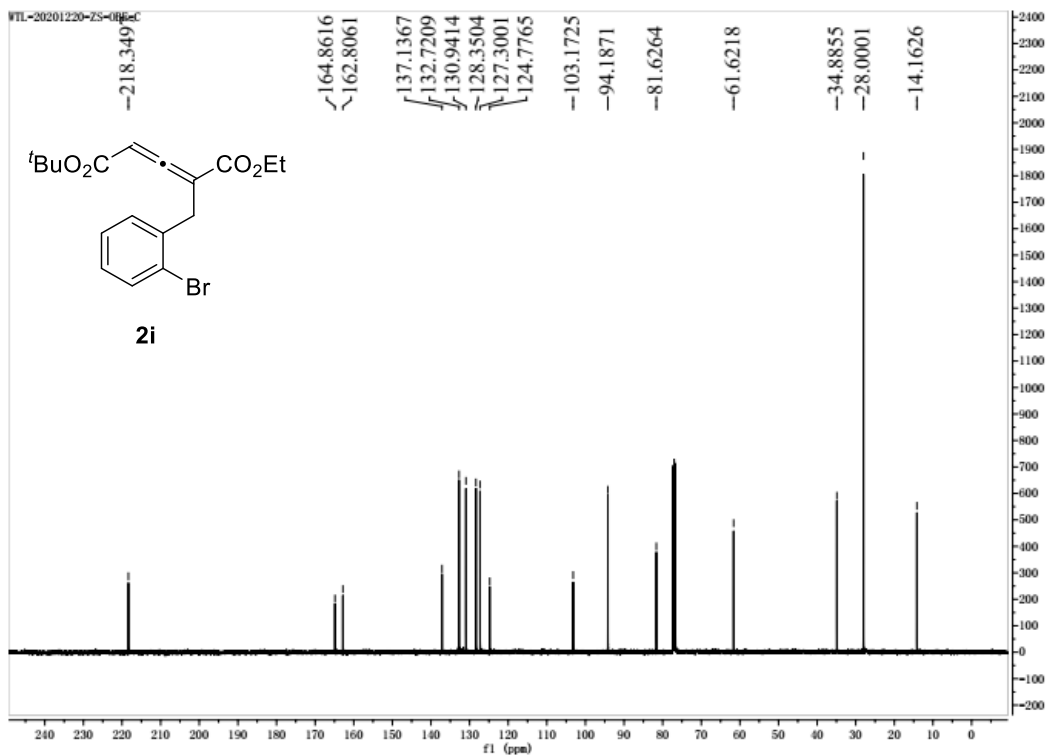

NMR of **2j** (CDCl<sub>3</sub>)

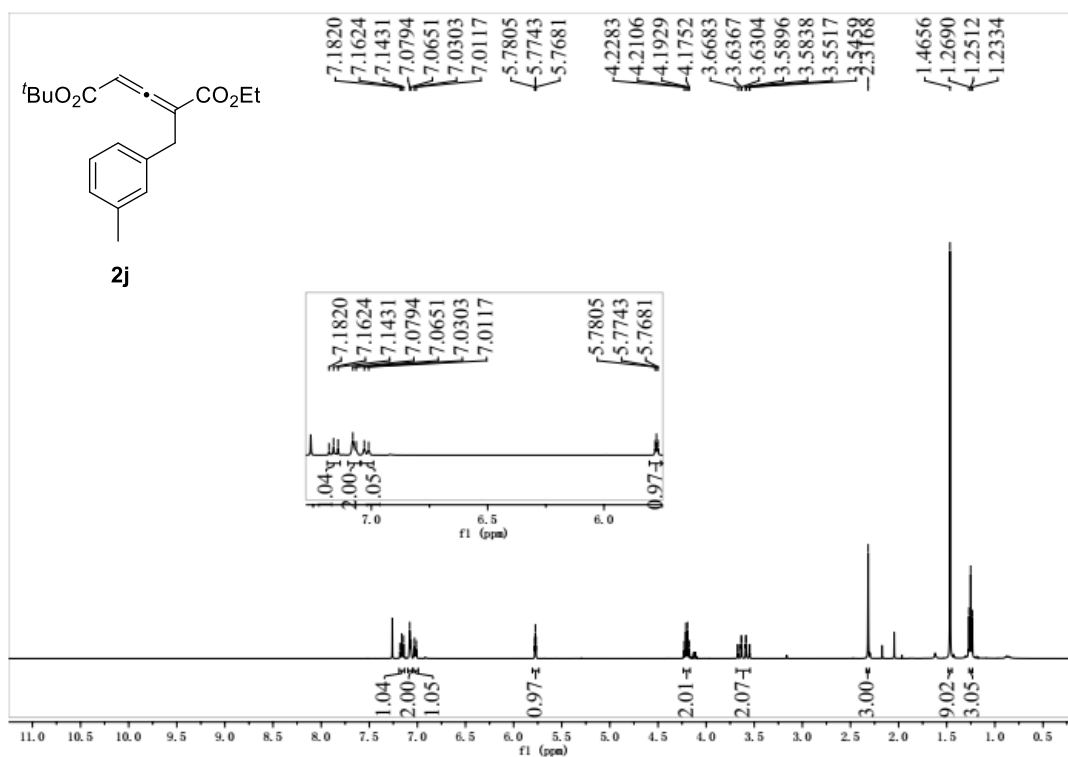

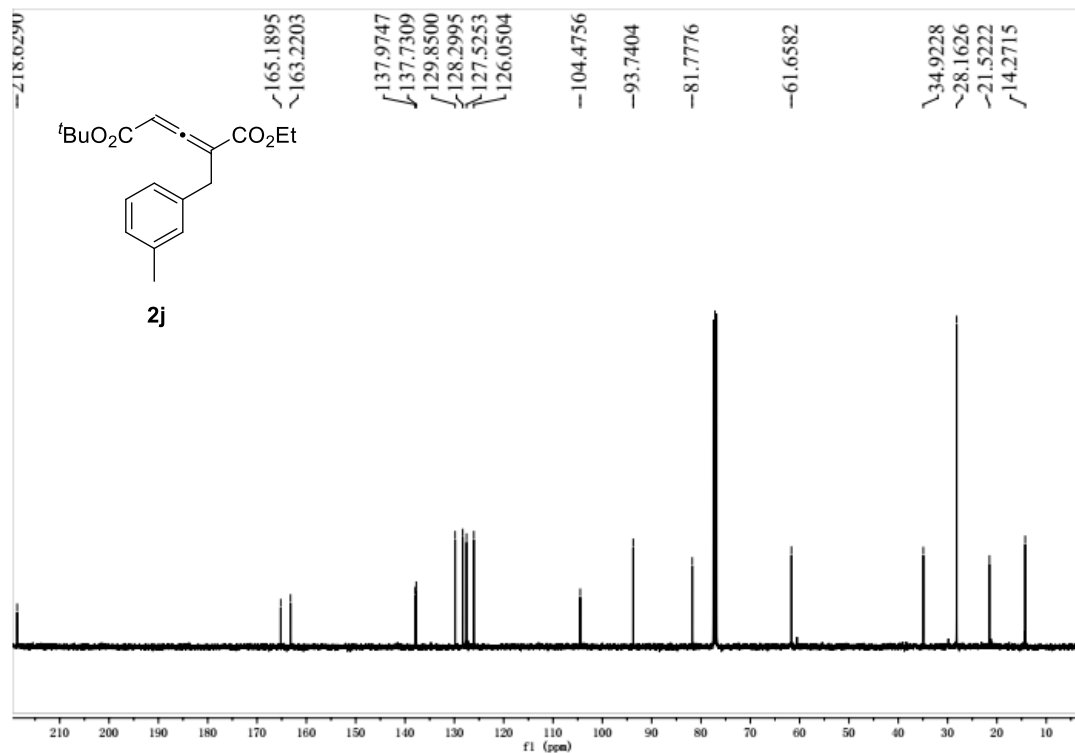

NMR of **2l** ( $\text{CDCl}_3$ )

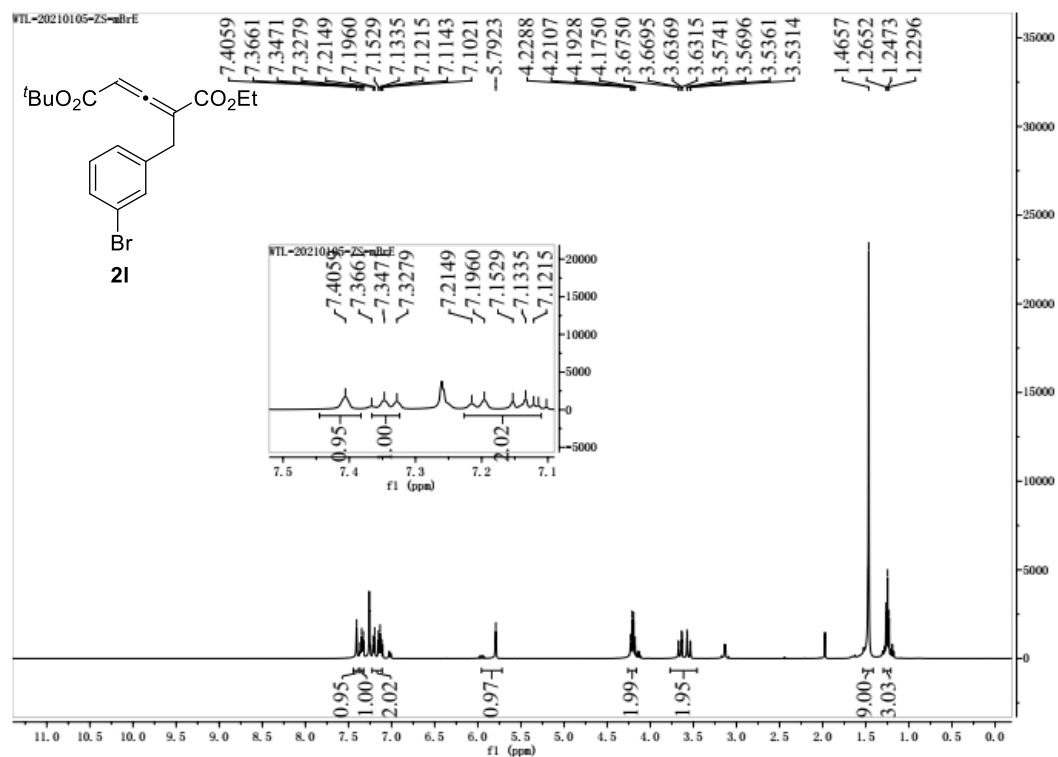

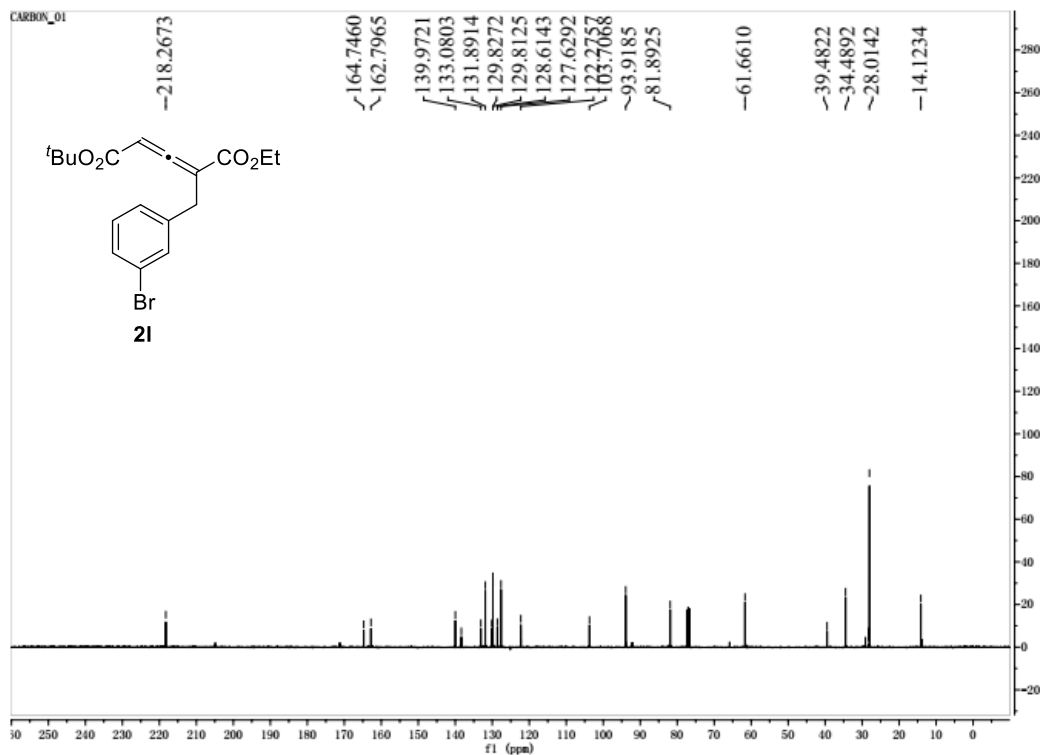

NMR of **2n** (CDCl<sub>3</sub>)

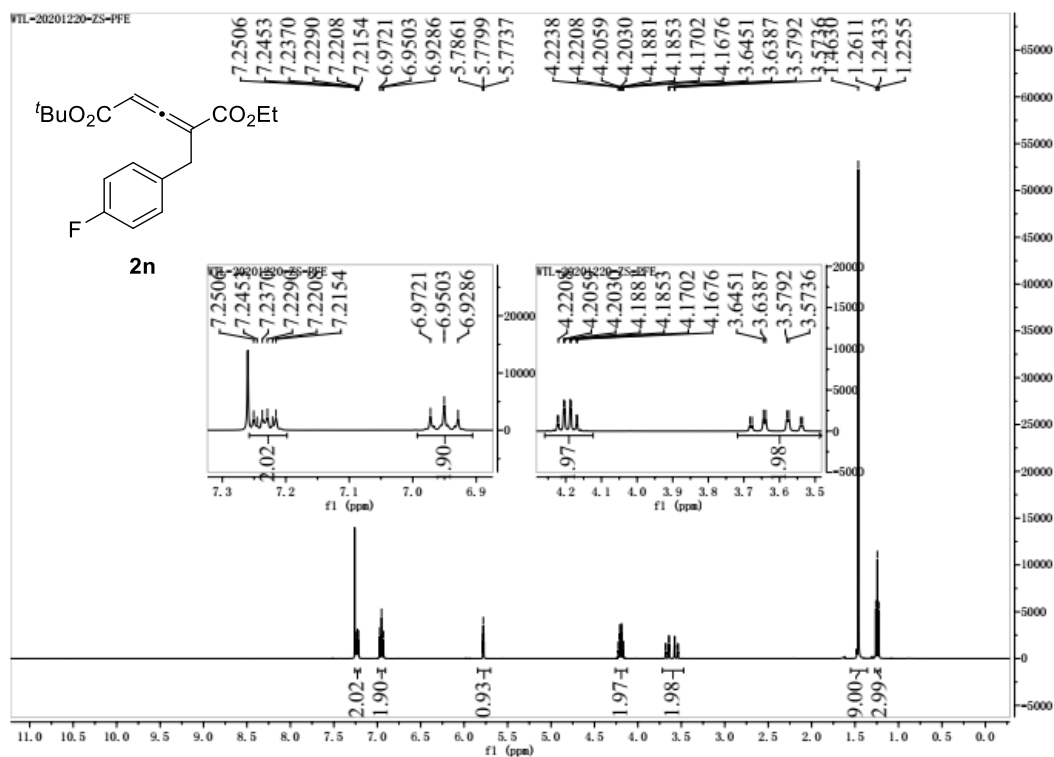

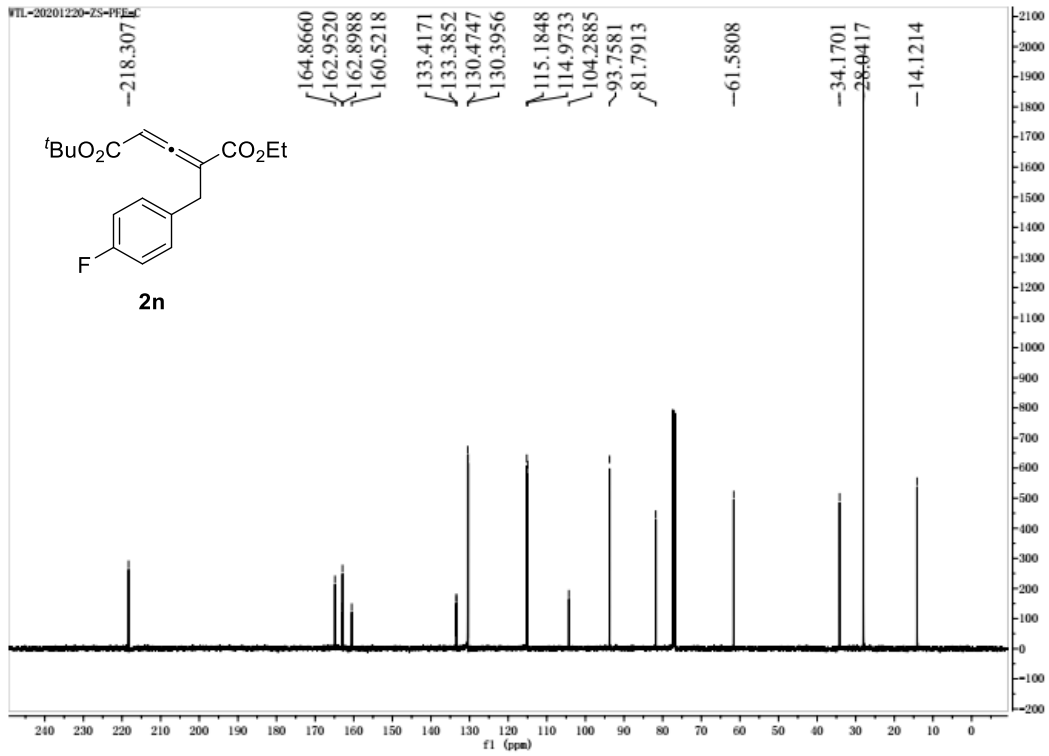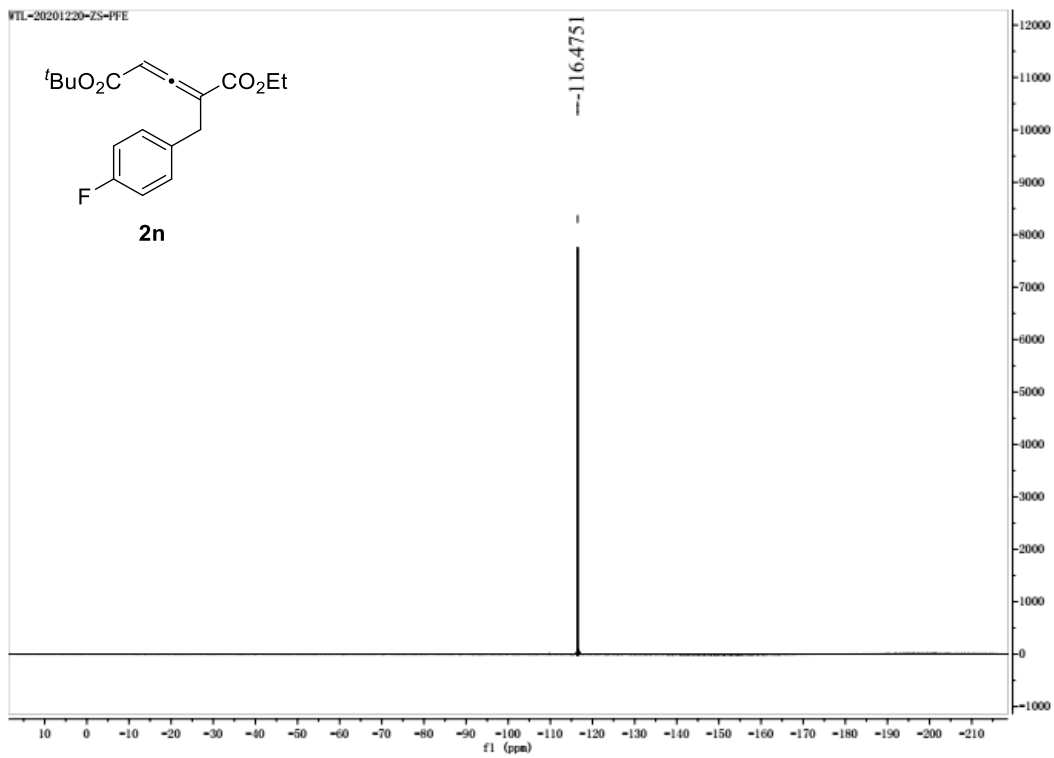

NMR of **2o** (CDCl<sub>3</sub>)

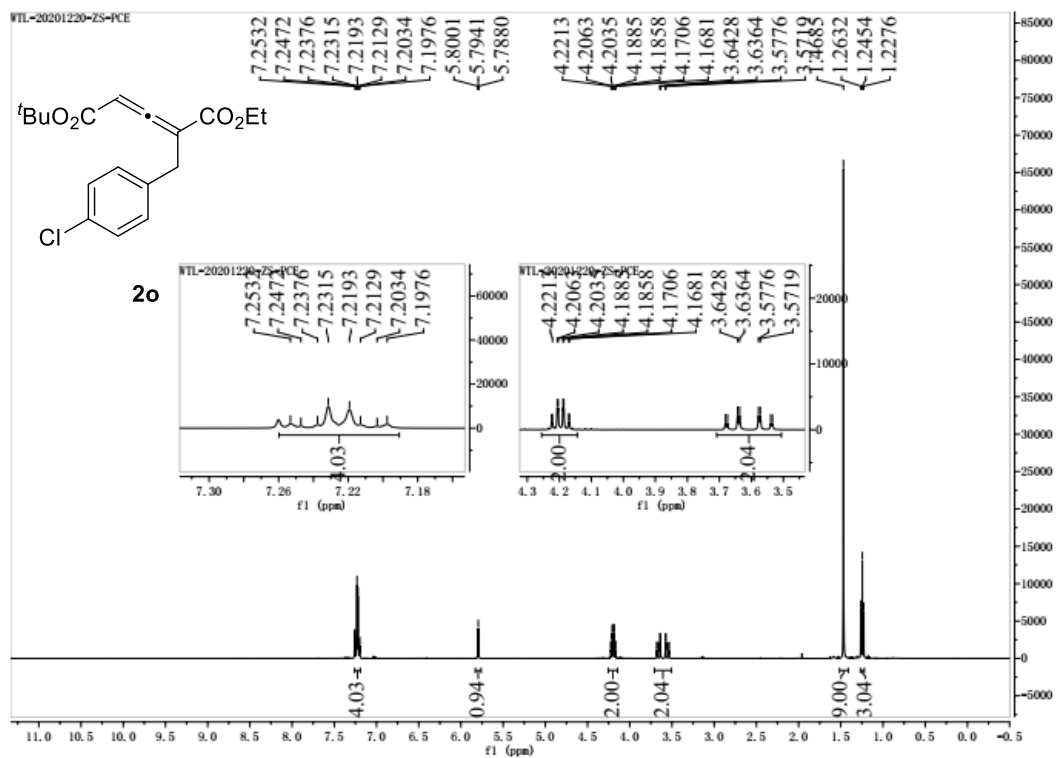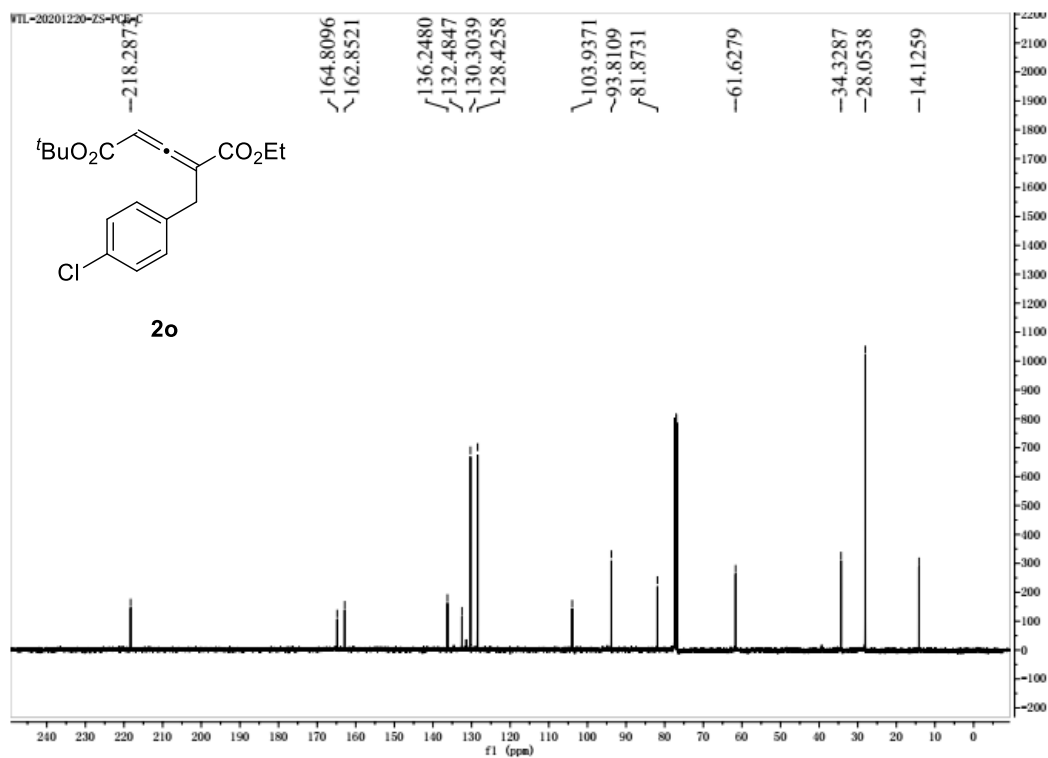

NMR of **2p** (CDCl<sub>3</sub>)

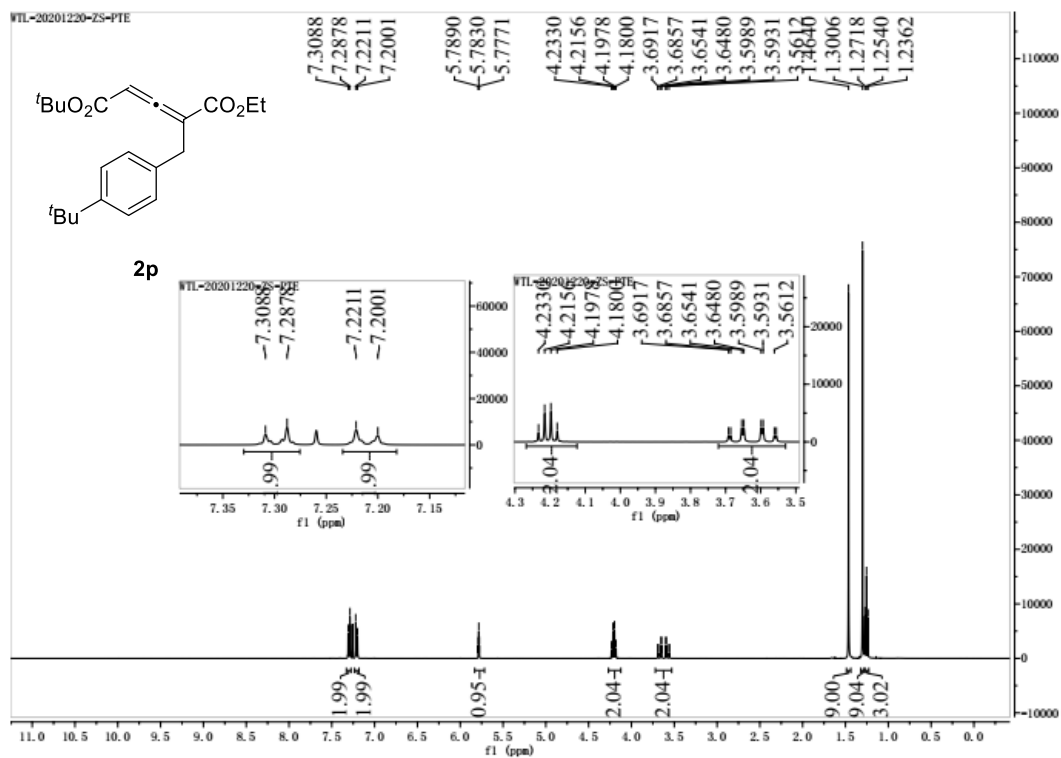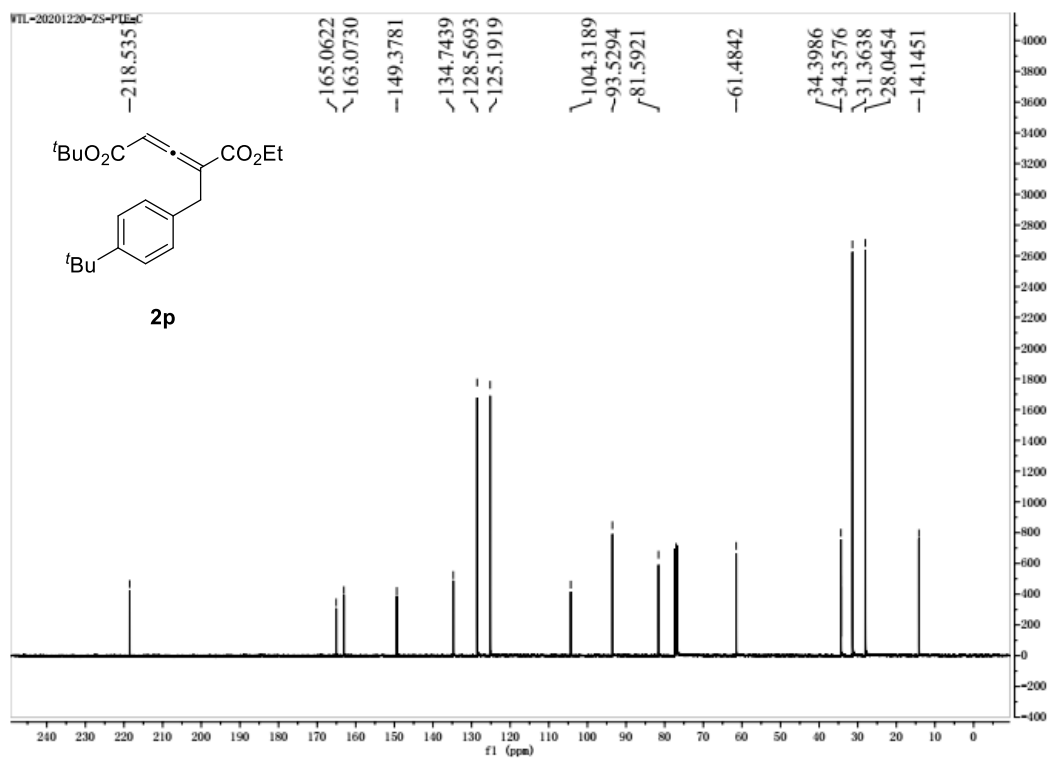



NMR of **2r** (CDCl<sub>3</sub>)

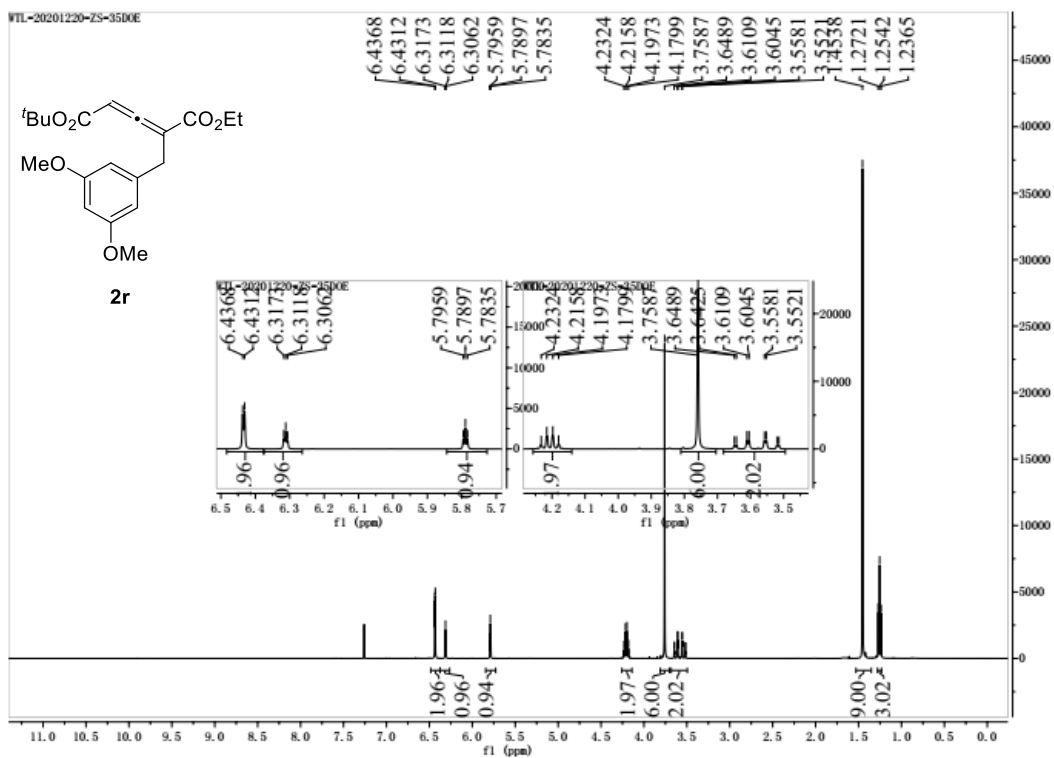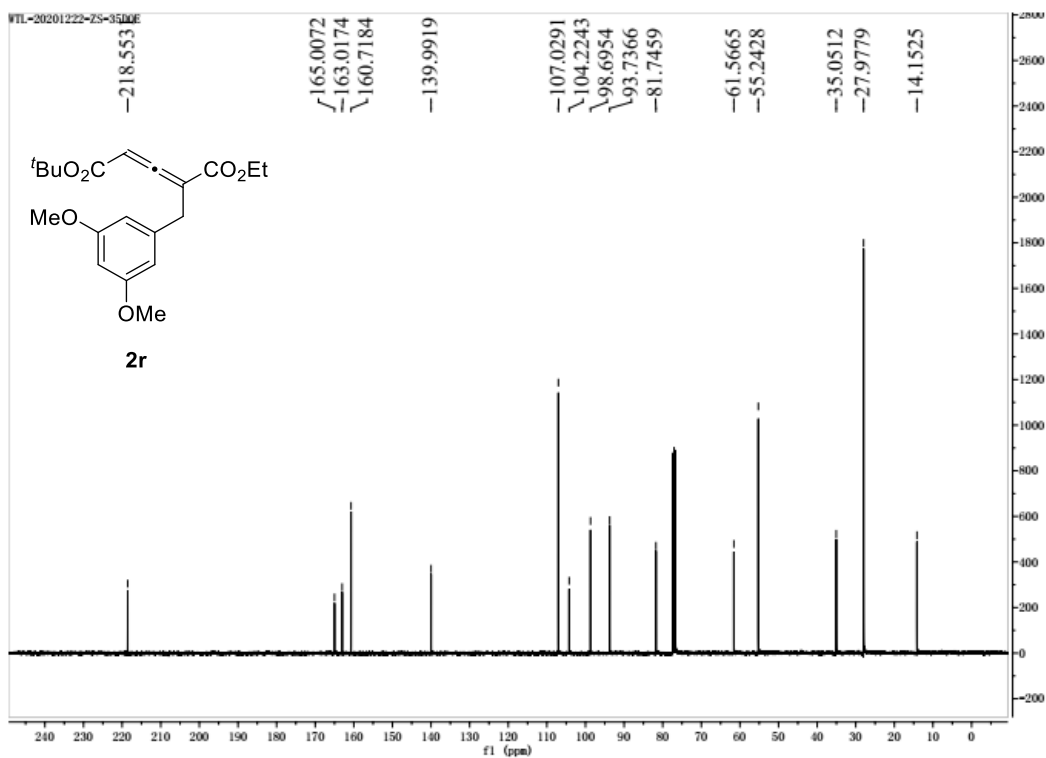

NMR of **2s** (CDCl<sub>3</sub>)

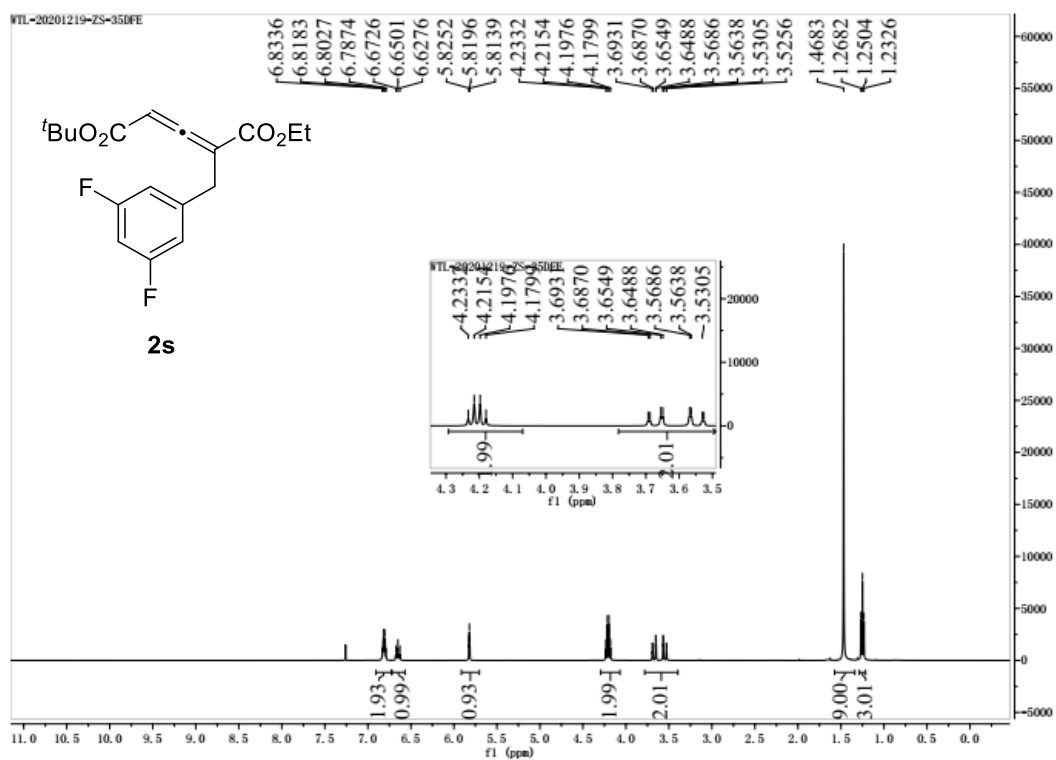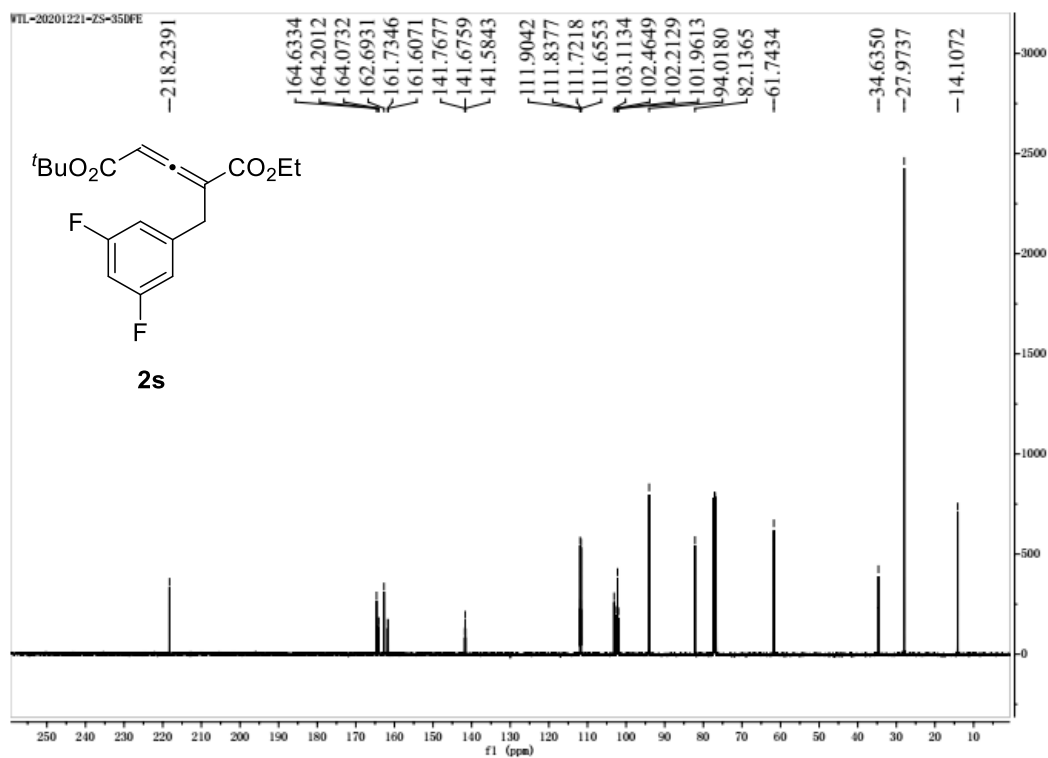

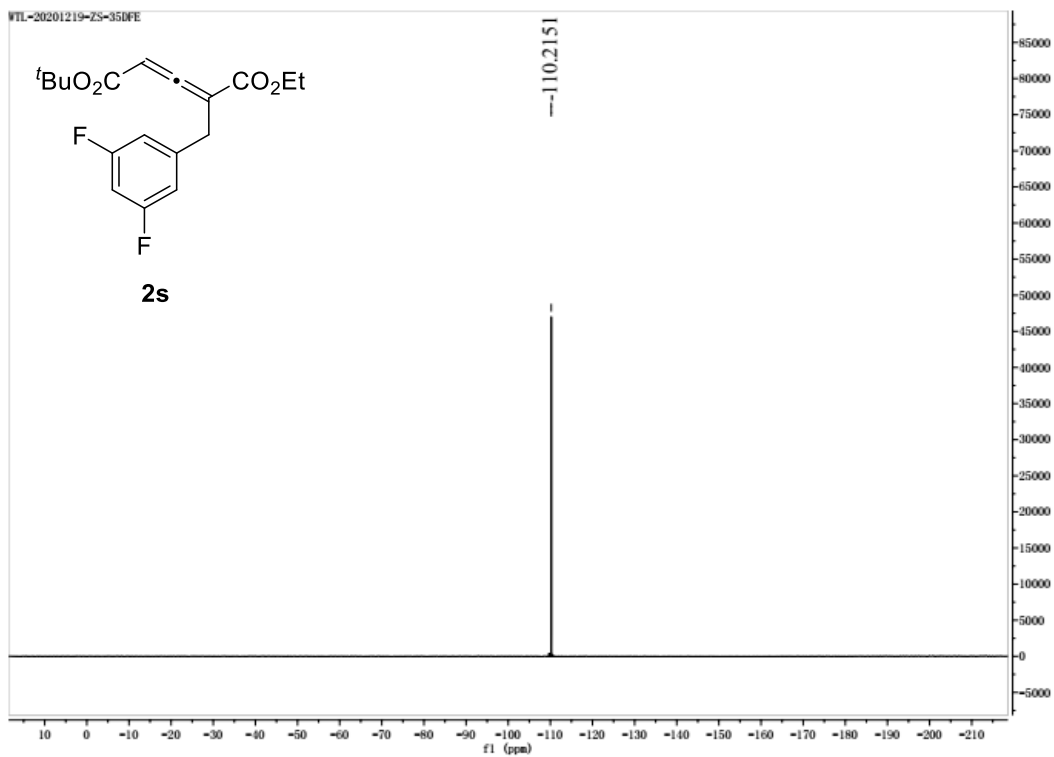

NMR of **2t** (CDCl<sub>3</sub>)

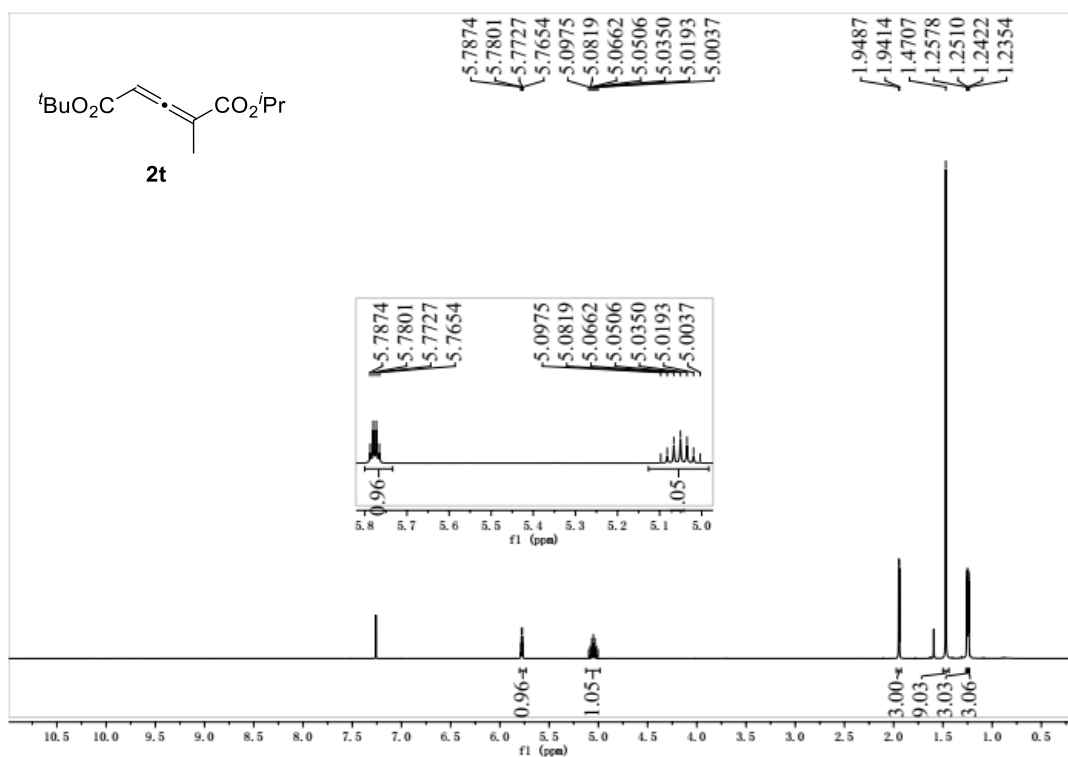

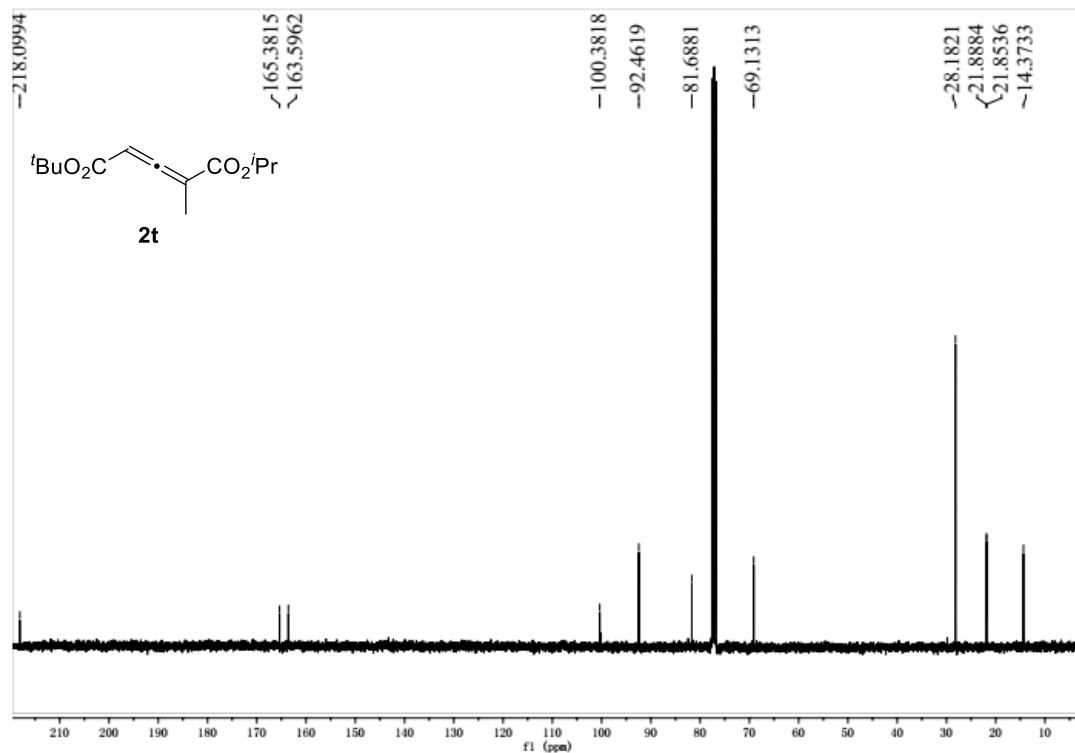

NMR of **2u** (CDCl<sub>3</sub>)

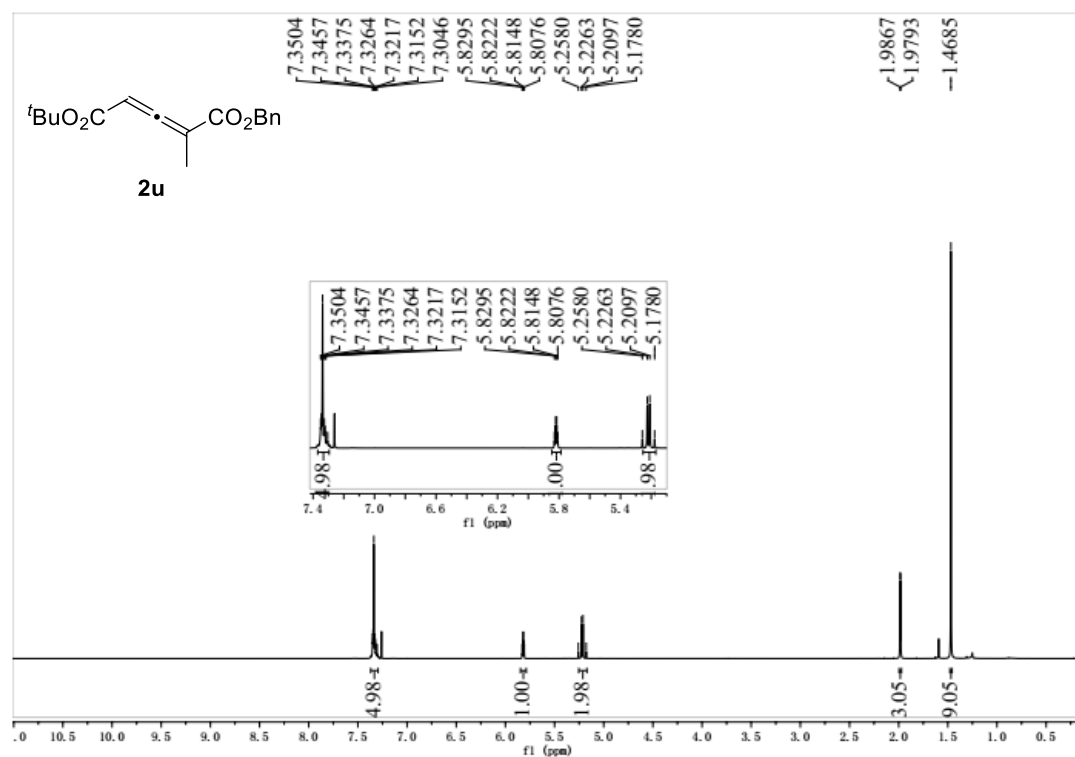

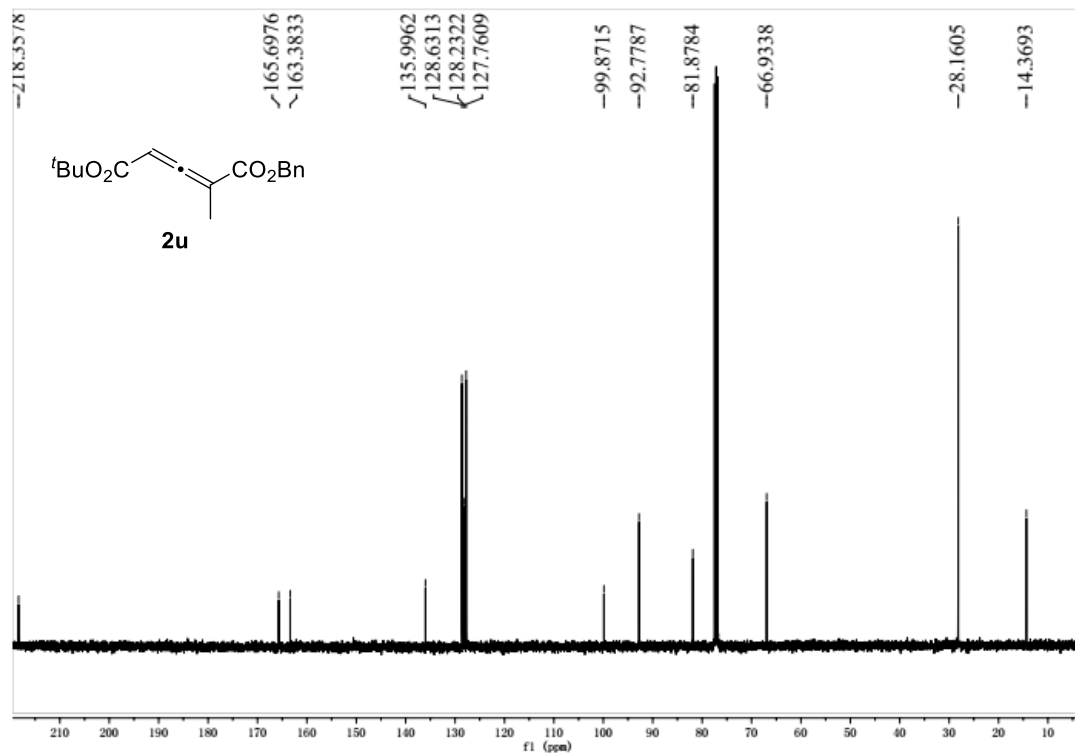

NMR of **2x** (CDCl<sub>3</sub>)

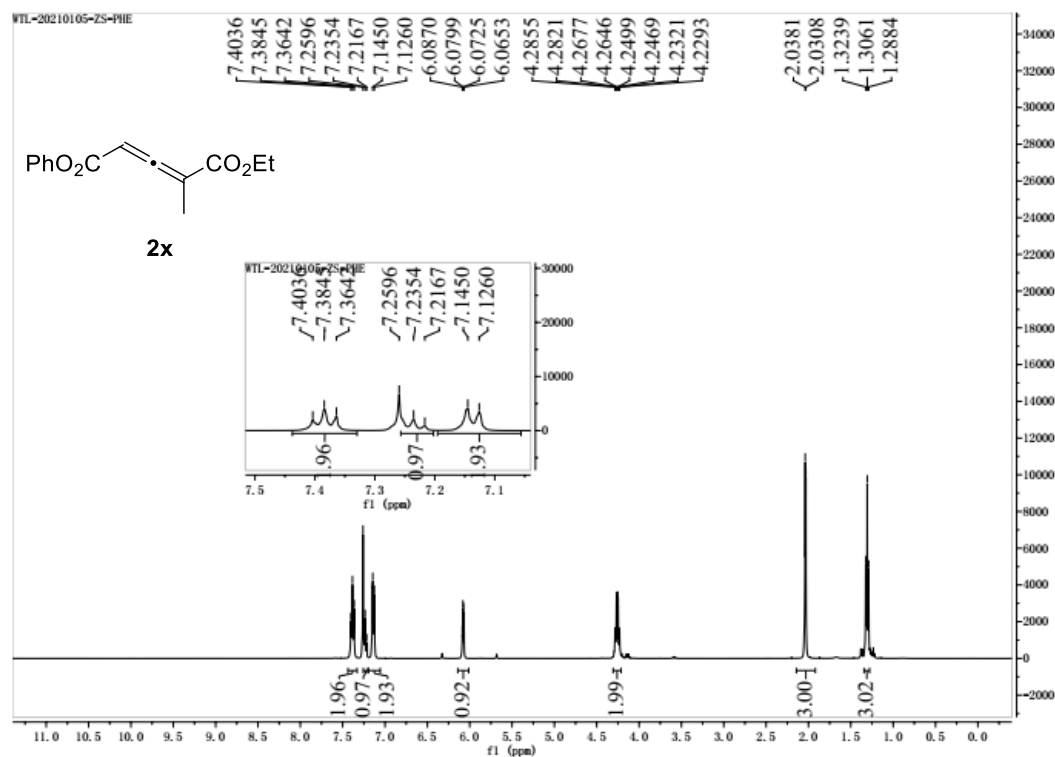

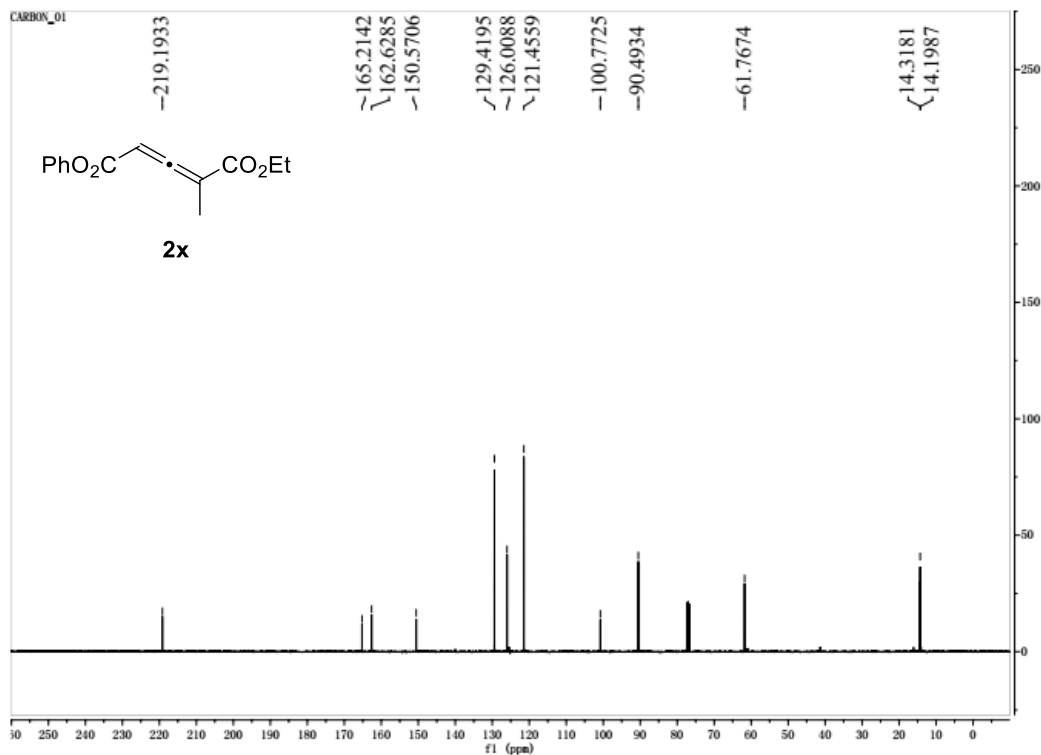

### NMR of **3a** (CDCl<sub>3</sub>)

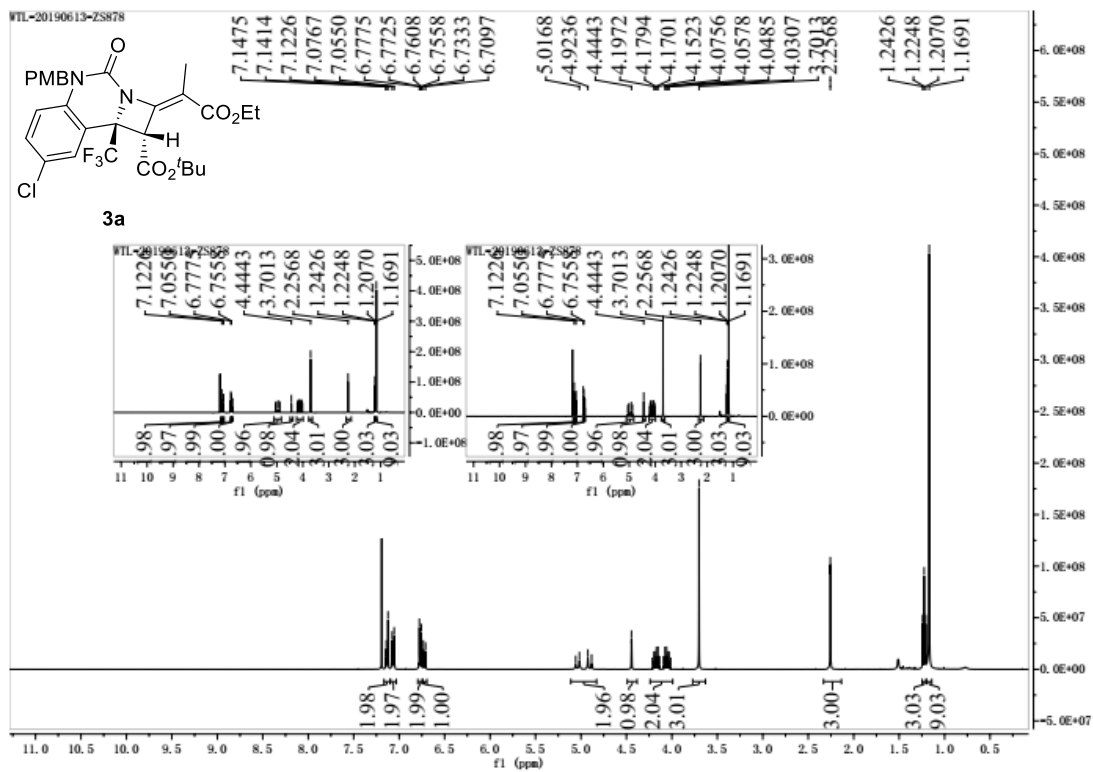

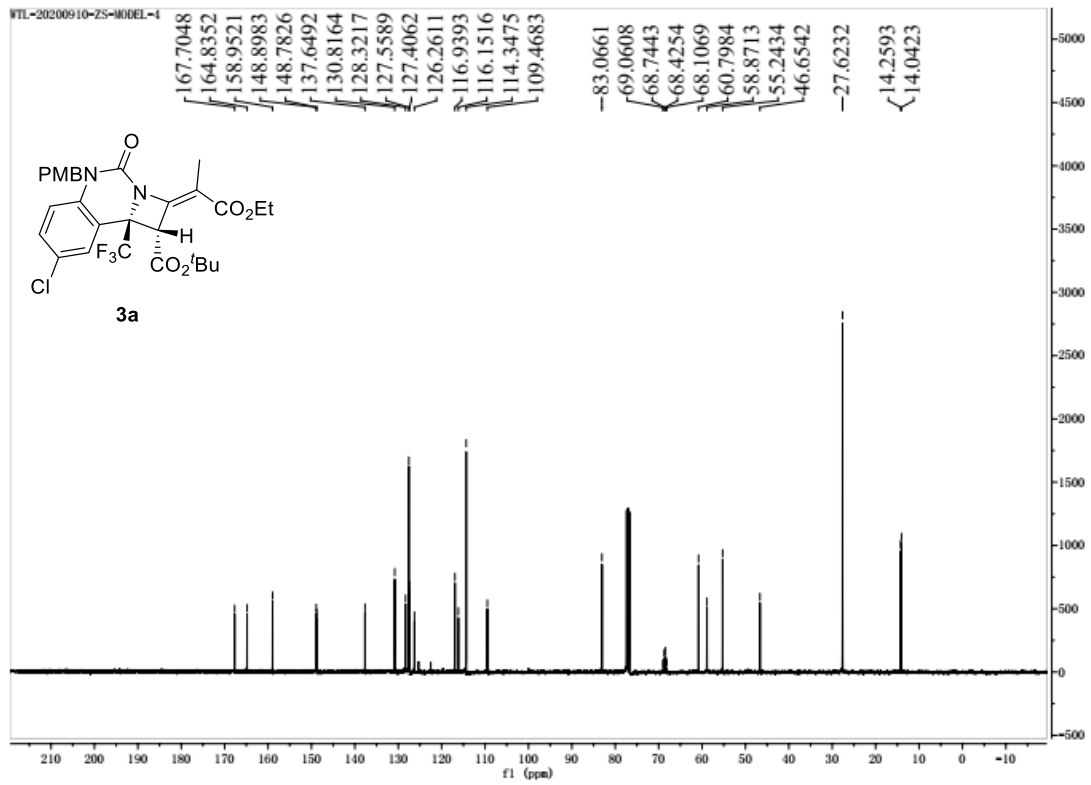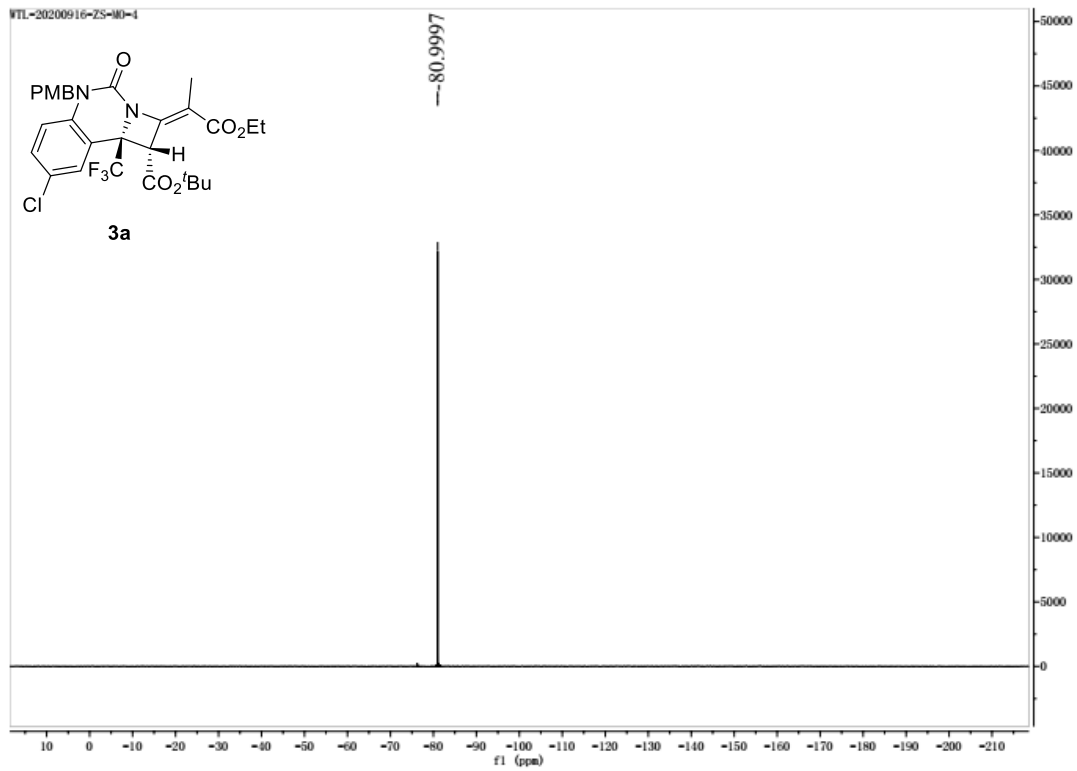

NMR of **3b** (CDCl<sub>3</sub>)

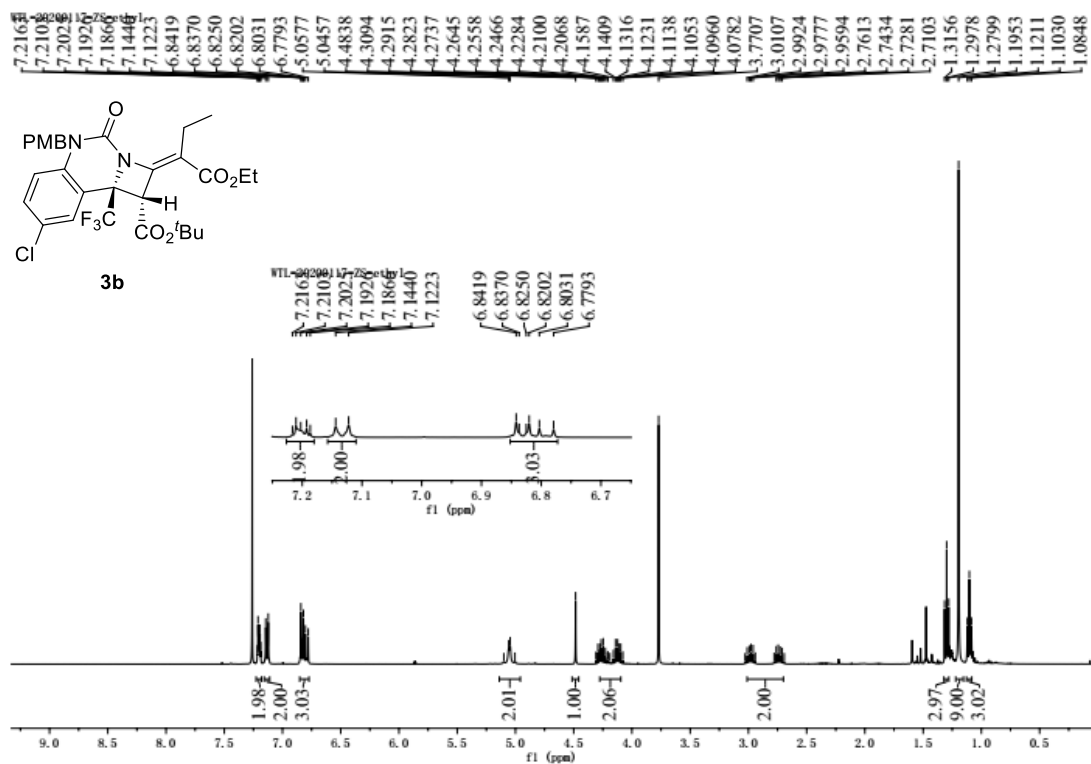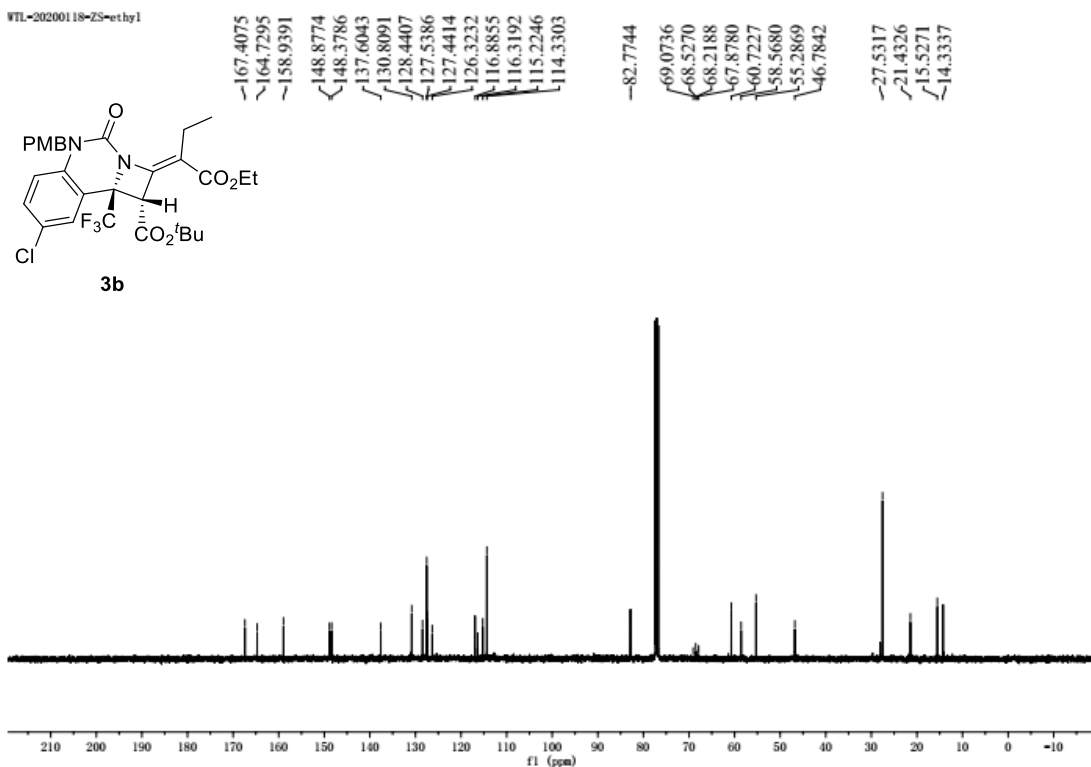



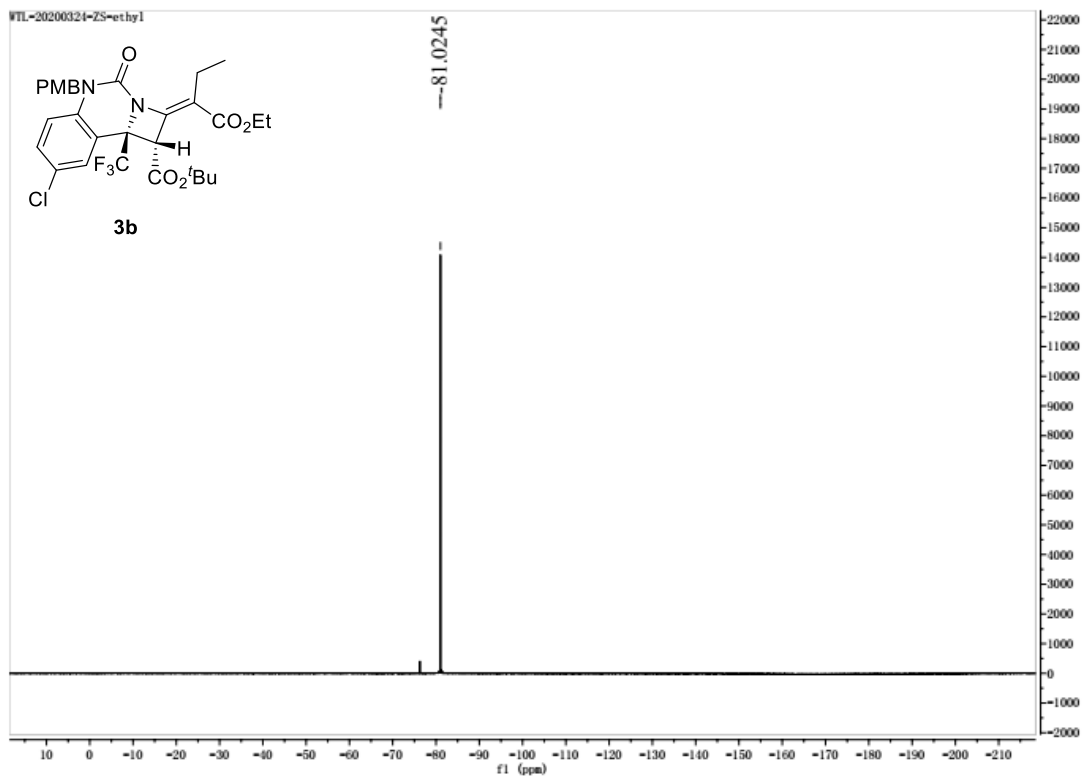

### NMR of **3c** (CDCl<sub>3</sub>)

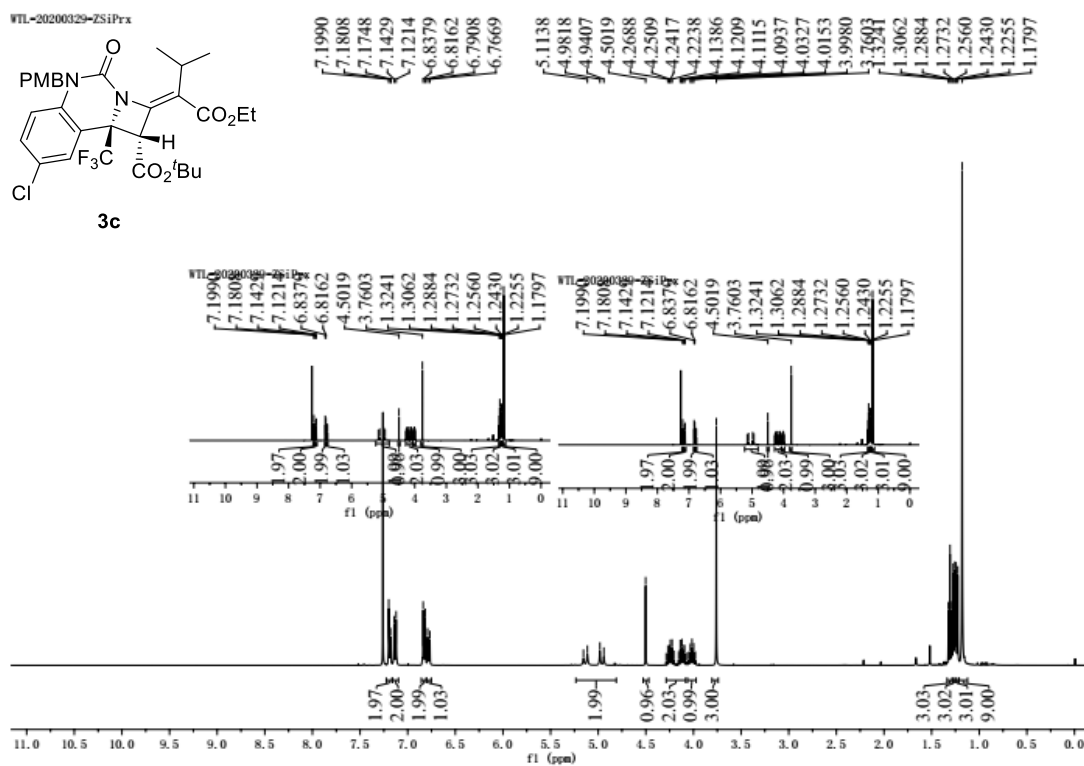

WTL-20200329-ZSiPrx-C

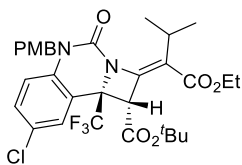

3c

166.7326  
164.7295  
158.9614  
148.7023  
148.1465  
137.5742  
130.7920  
128.3069  
127.5566  
127.4730  
126.3519  
119.8843  
116.7813  
116.0092  
114.3342  
82.8186  
68.9159  
68.5988  
68.2799  
67.9600  
60.3252  
59.3543  
55.2462  
46.7578  
28.4047  
27.4907  
22.0457  
20.7952  
14.2028

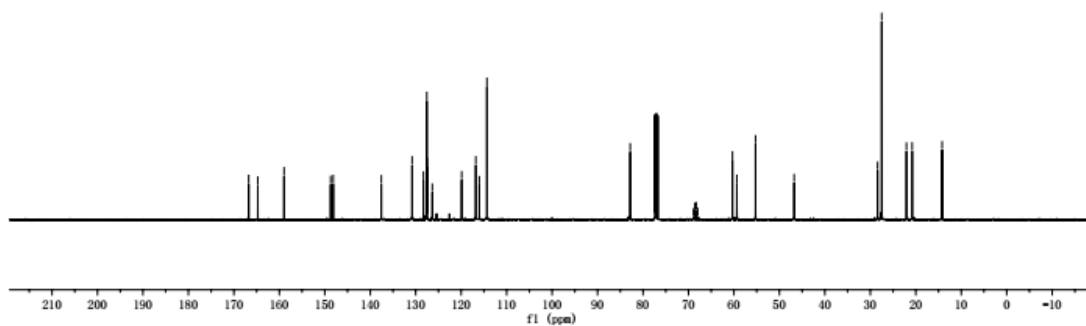

WTL-20200329-ZSiPrx

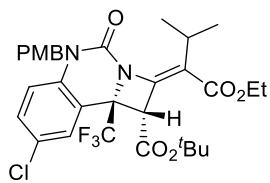

3c

80.9193

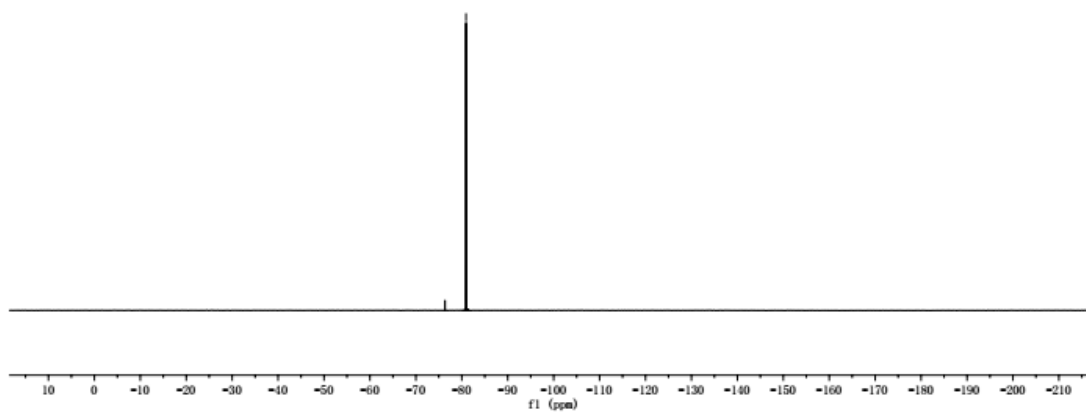

NMR of **3d** (CDCl<sub>3</sub>)

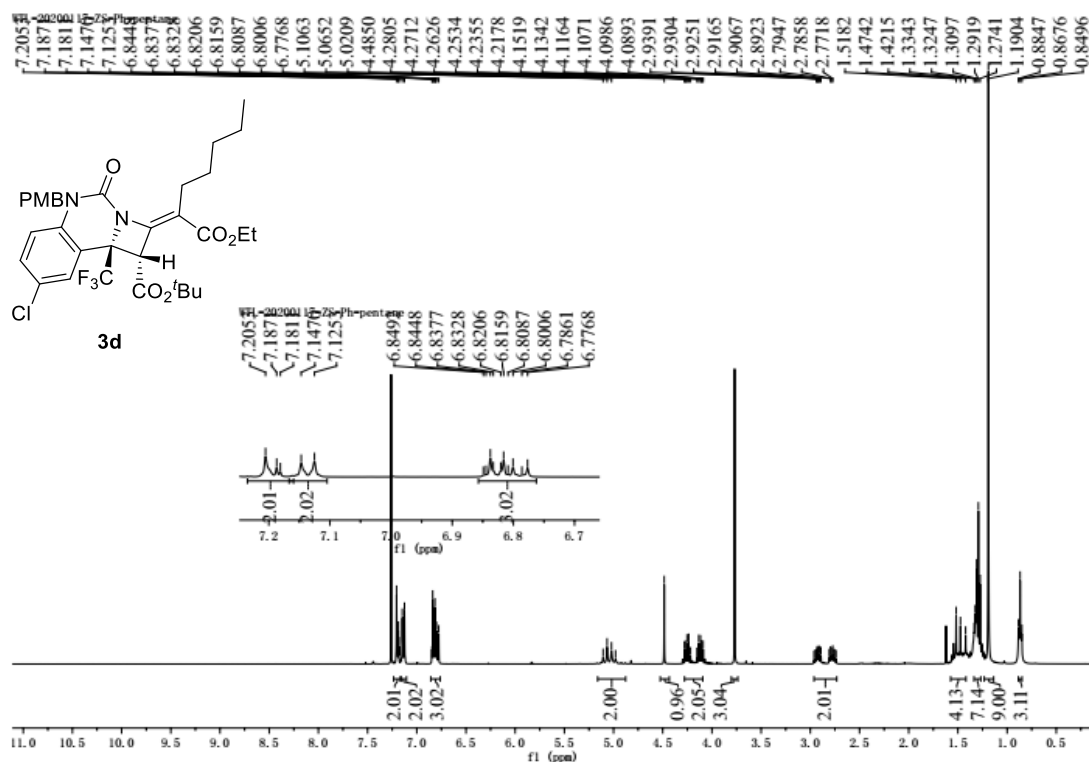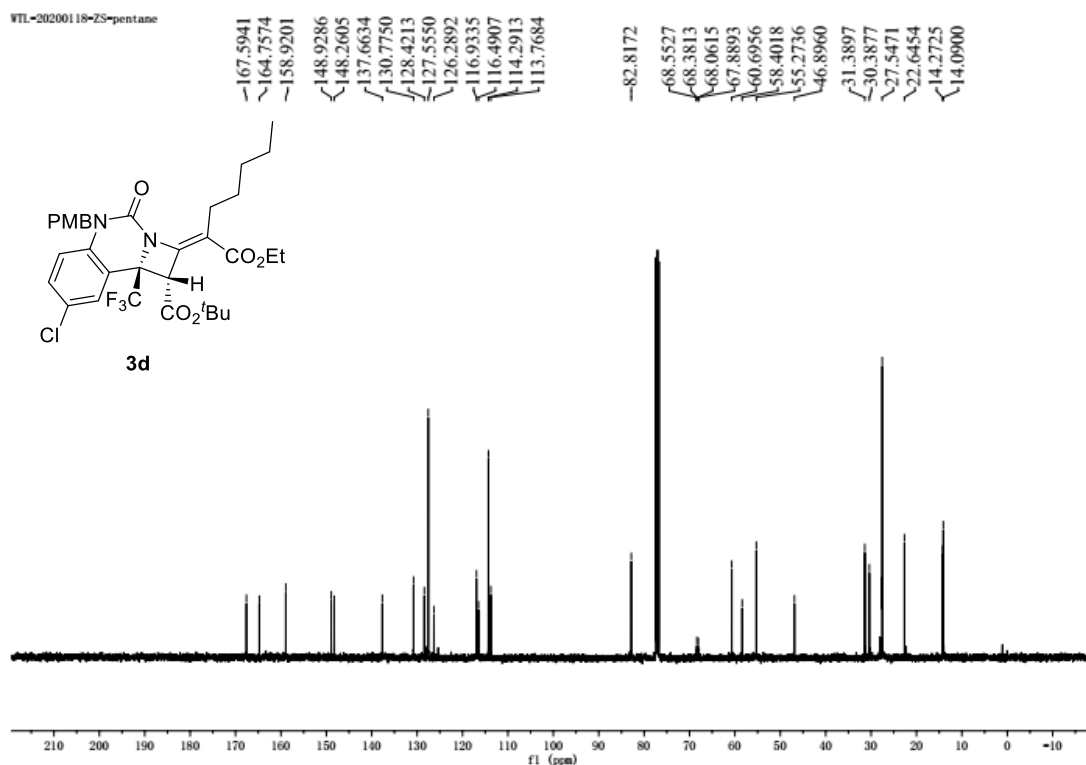

WTL-20200324-ZS-pentane

-81.0552

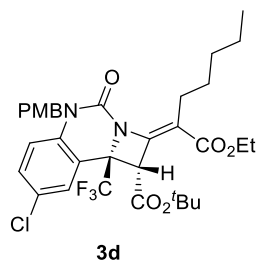

3d

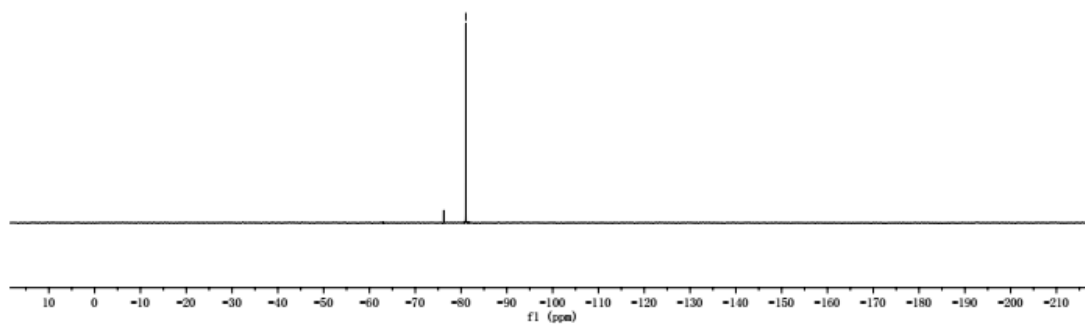

### NMR of 3e (CDCl<sub>3</sub>)

WTL-20200116-ZS-In

7.2419, 7.2346, 7.2283, 7.2201, 7.2140, 7.1690, 7.1620, 7.1556, 7.1474, 7.1401, 7.1336, 7.0992, 7.0776, 6.8413, 6.8206, 6.7992, 5.1303, 5.0894, 4.9397, 4.5932, 4.4890, 4.4517, 4.1864, 4.1784, 4.1690, 4.1597, 4.1511, 4.1417, 4.1335, 4.1240, 4.0510, 4.0332, 4.0239, 4.0061, 3.2899, 1.1832, 1.1654, 1.1476

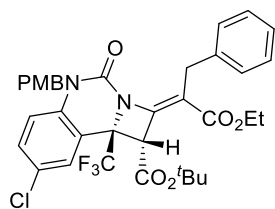

3e

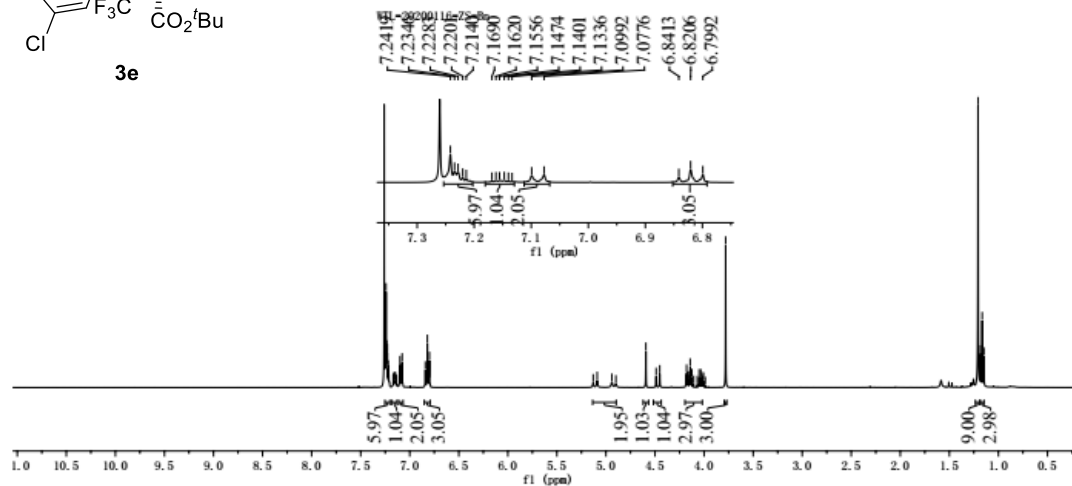

WTL-20200117-ZS-01n

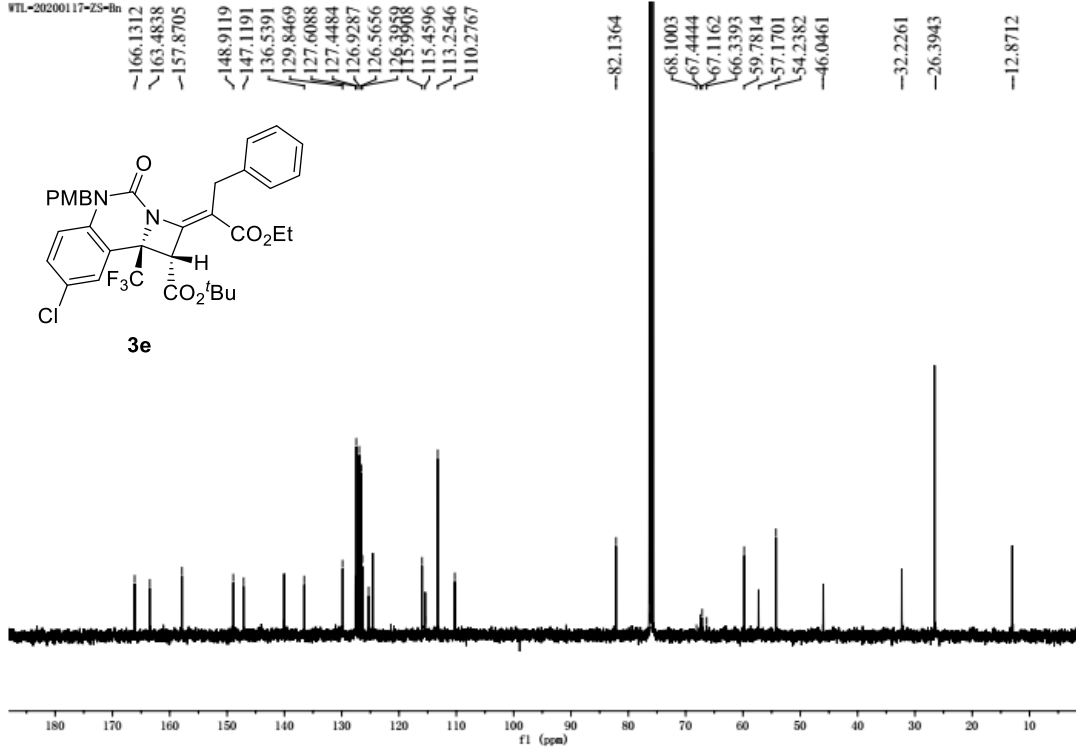

WTL-20200324-ZS-01n

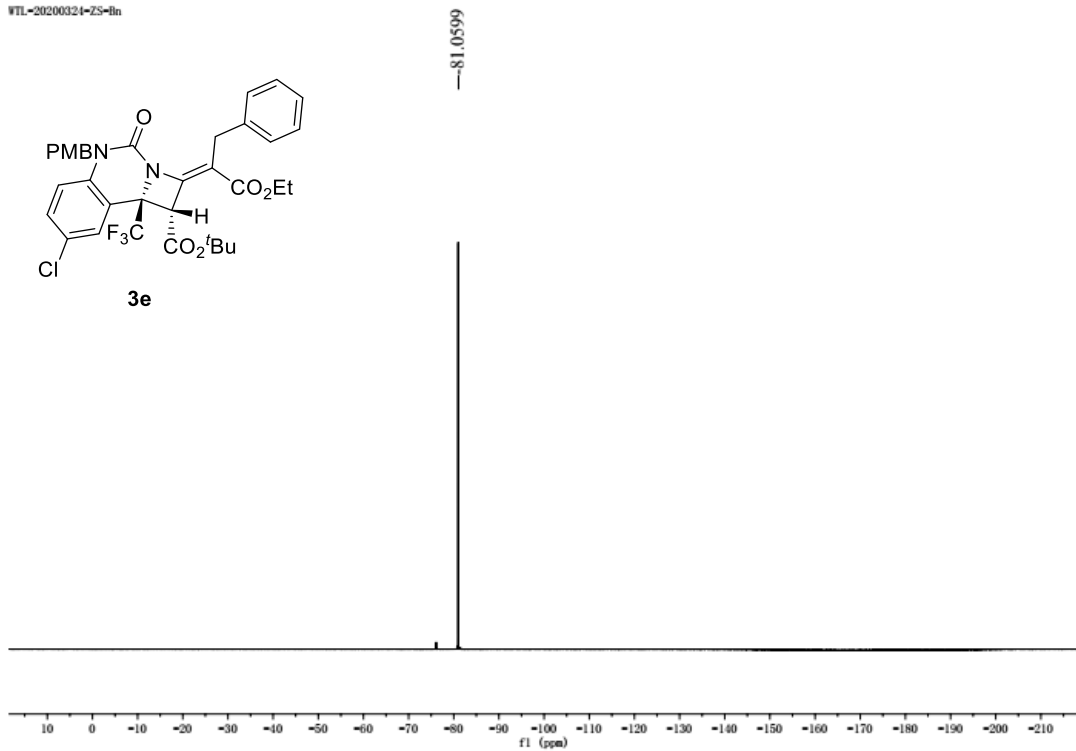

# NMR of **3f** (CDCl<sub>3</sub>)

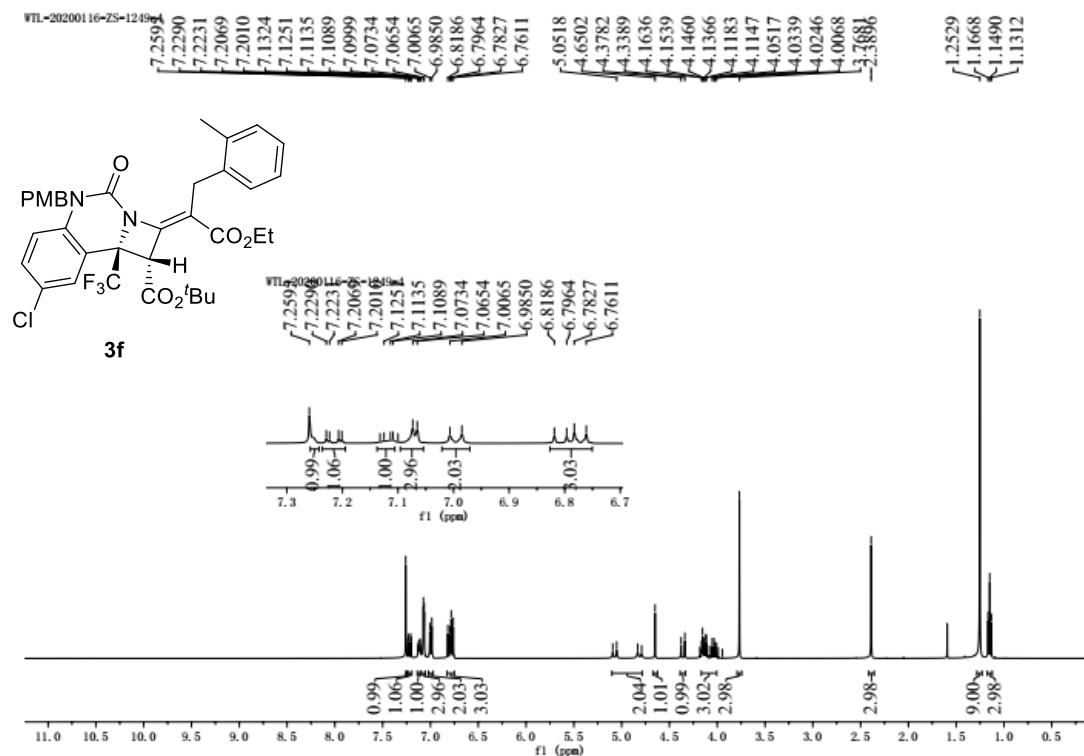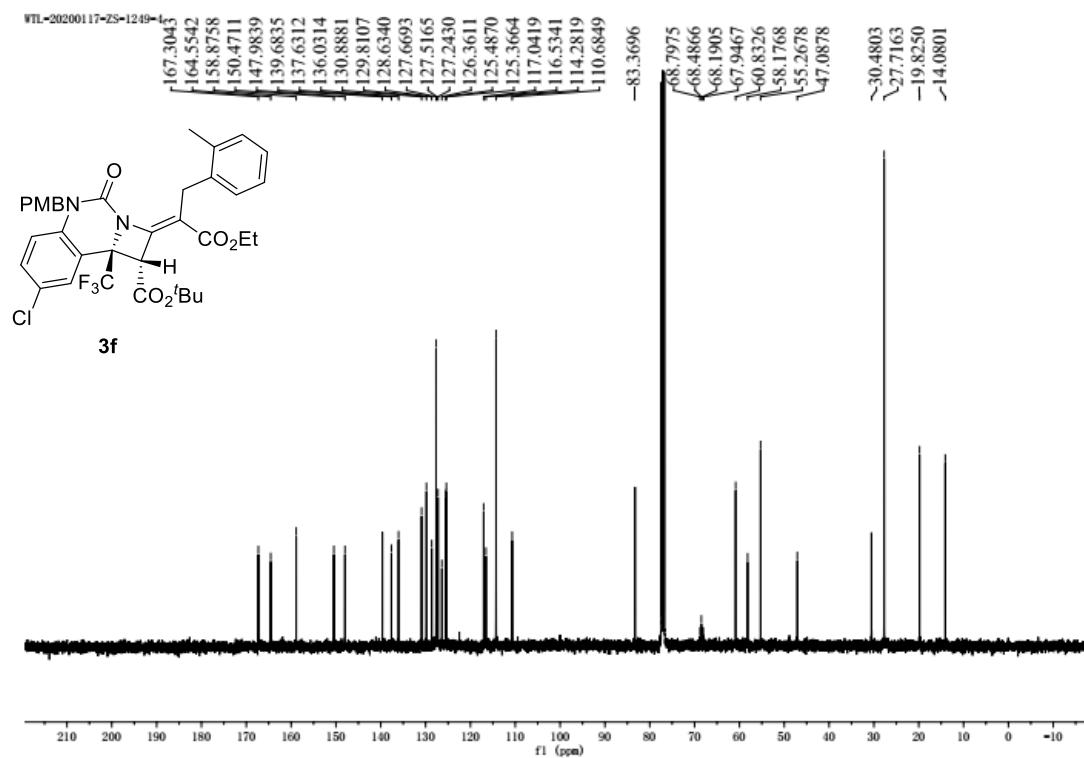

WTL-20200324-ZS-1249-1

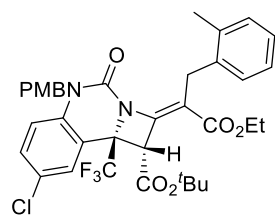

3f

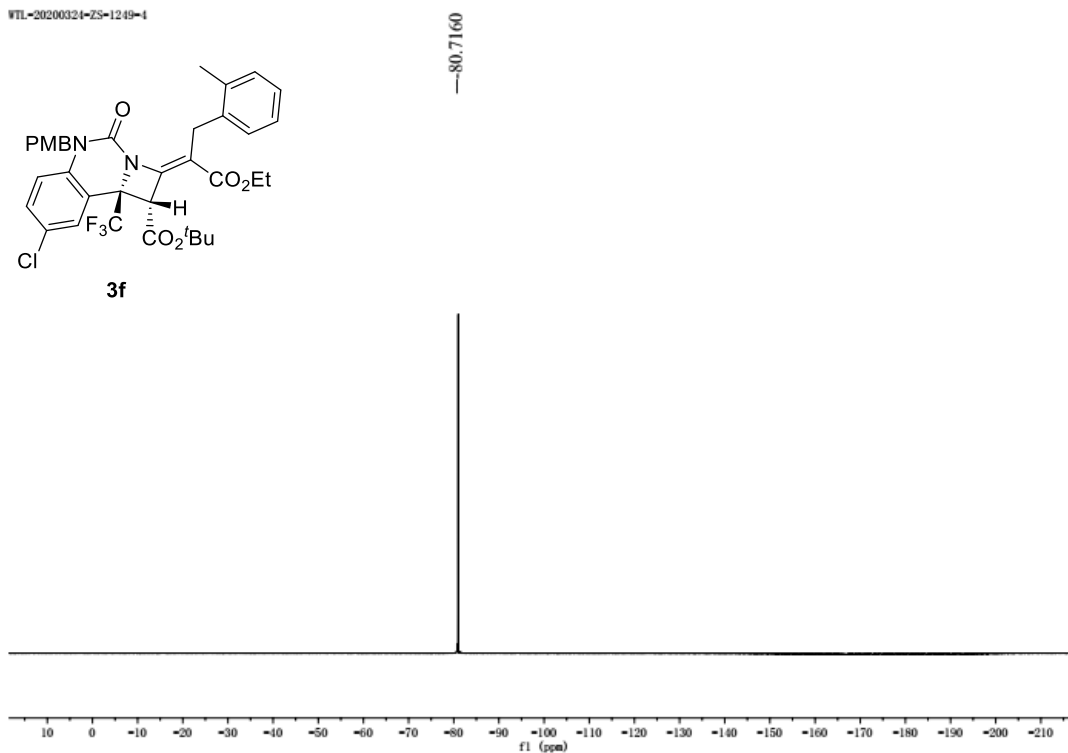

NMR of 3g (CDCl<sub>3</sub>)

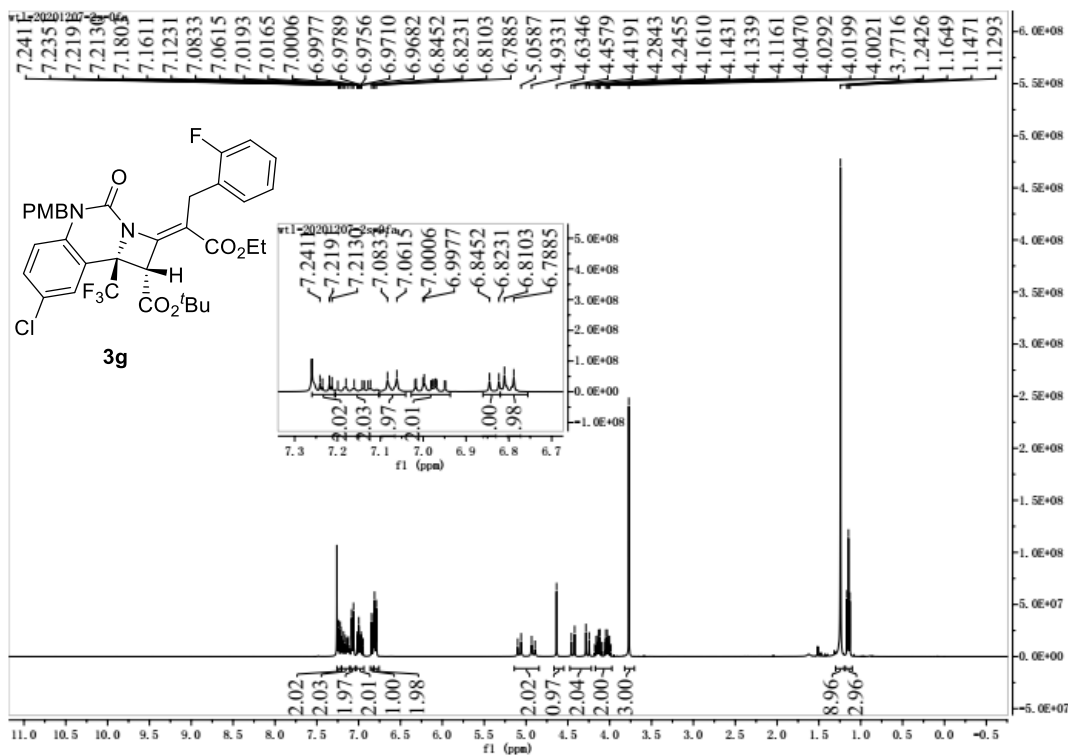

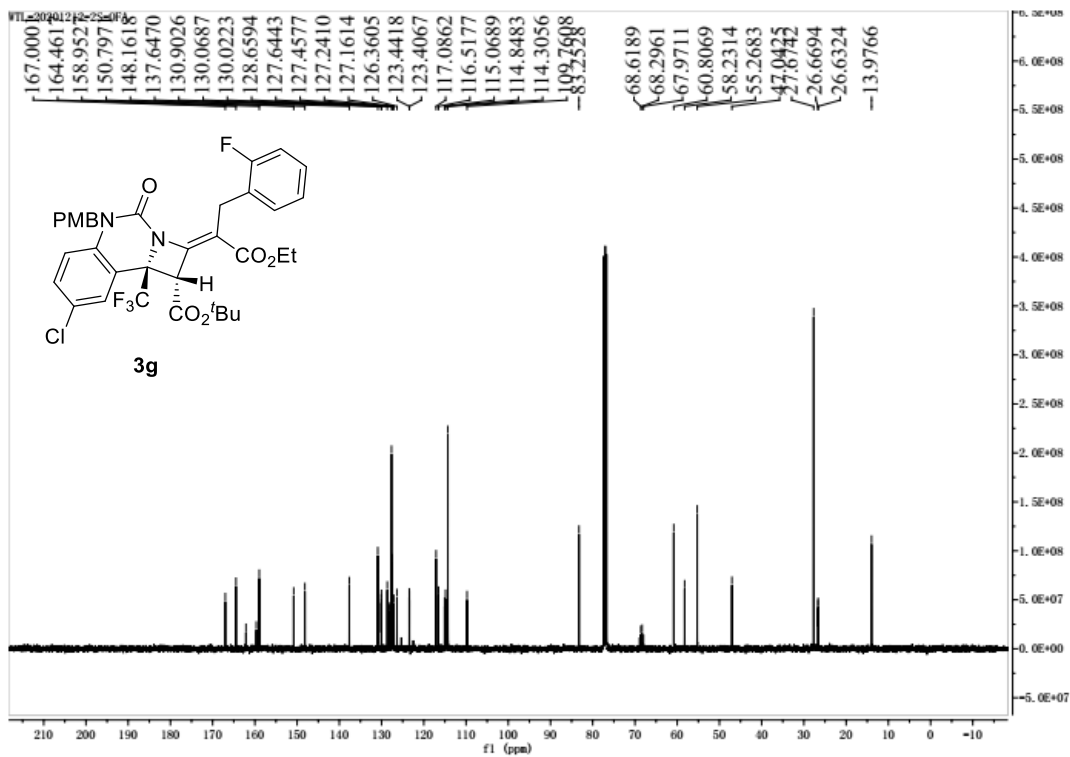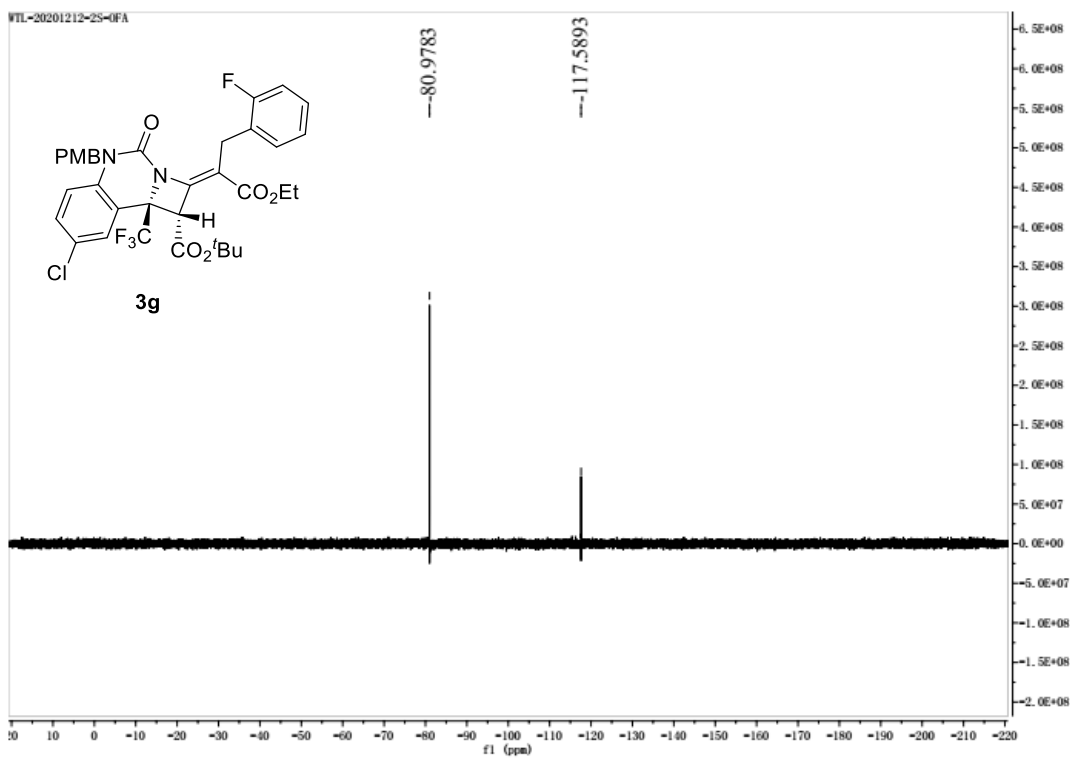



NMR of **3h** (CDCl<sub>3</sub>)

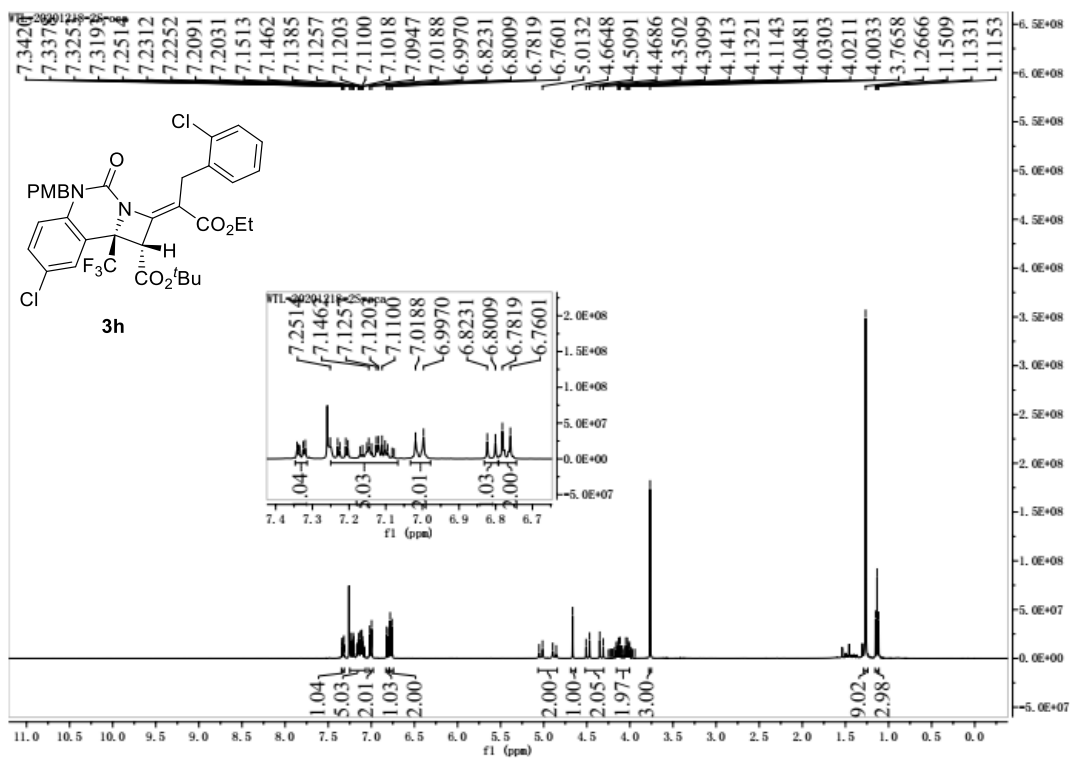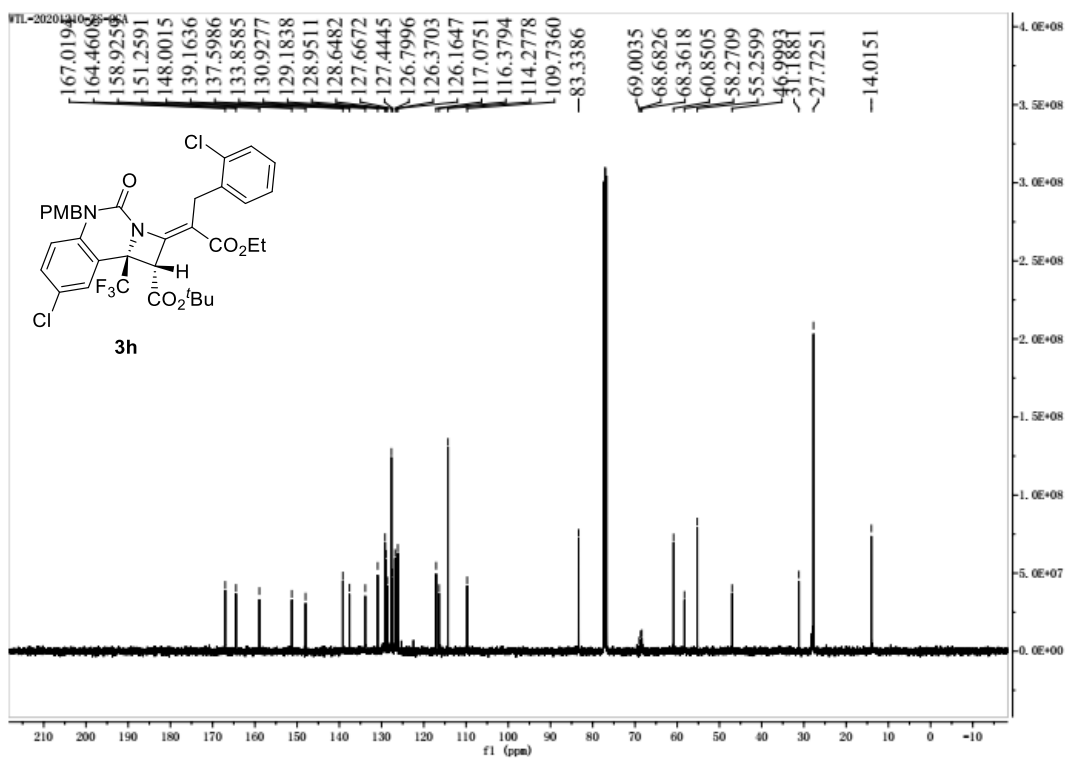

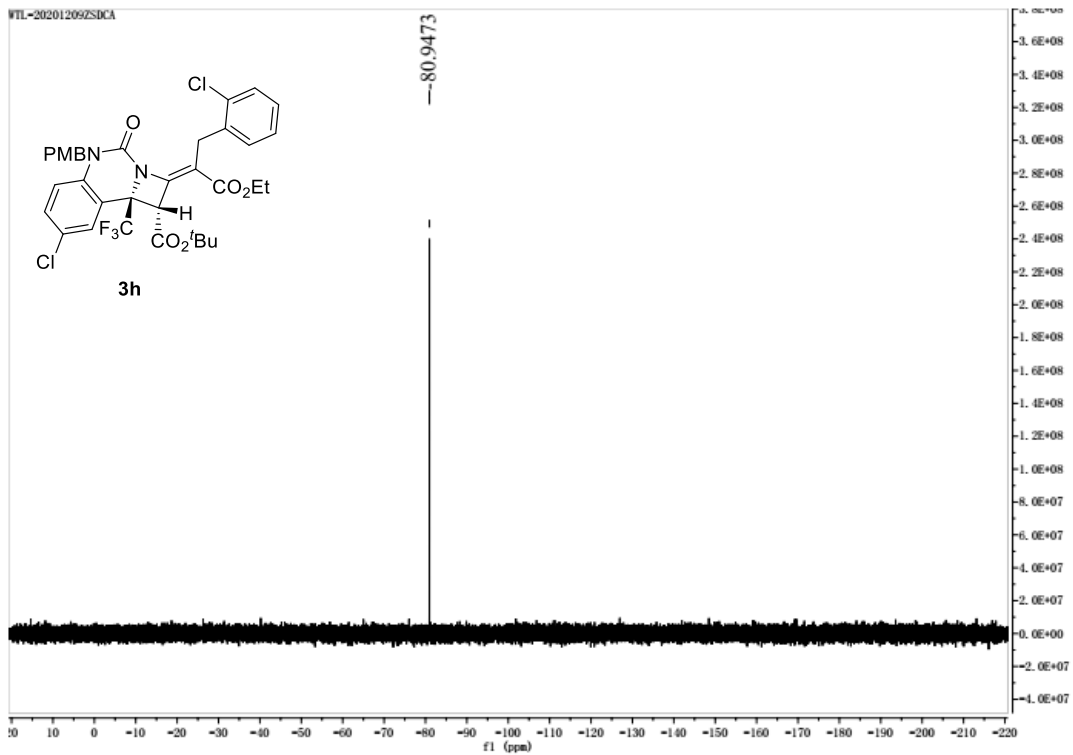

NMR of **3i** (CDCl<sub>3</sub>)

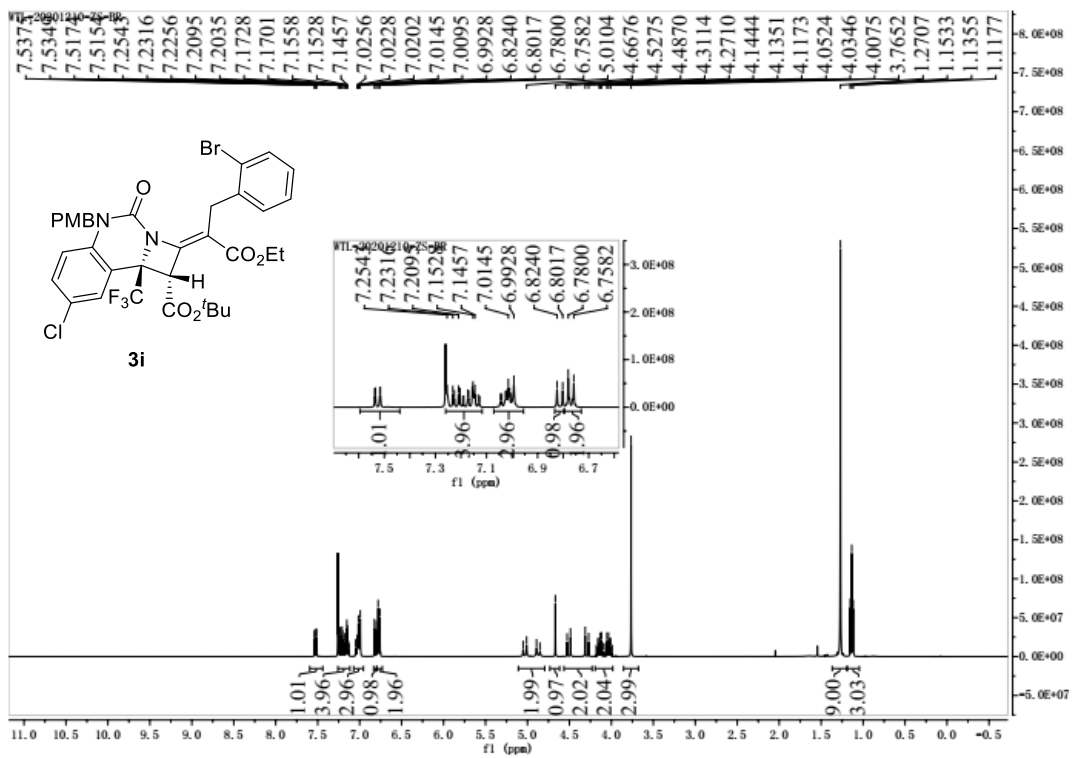

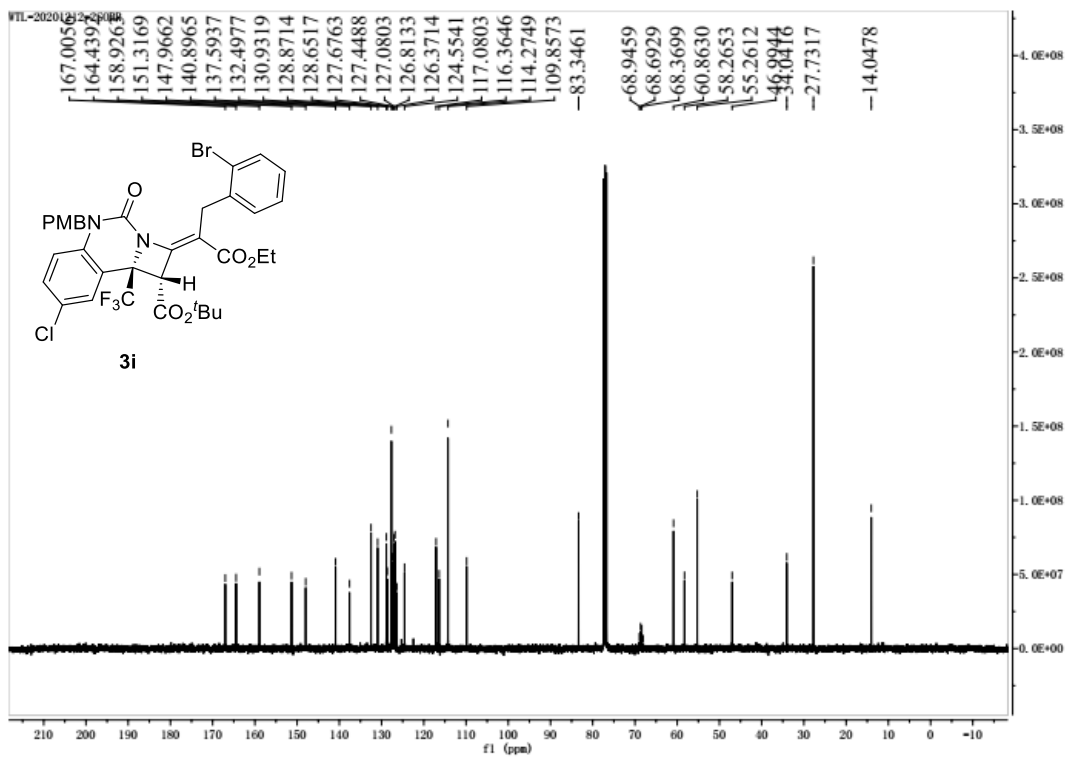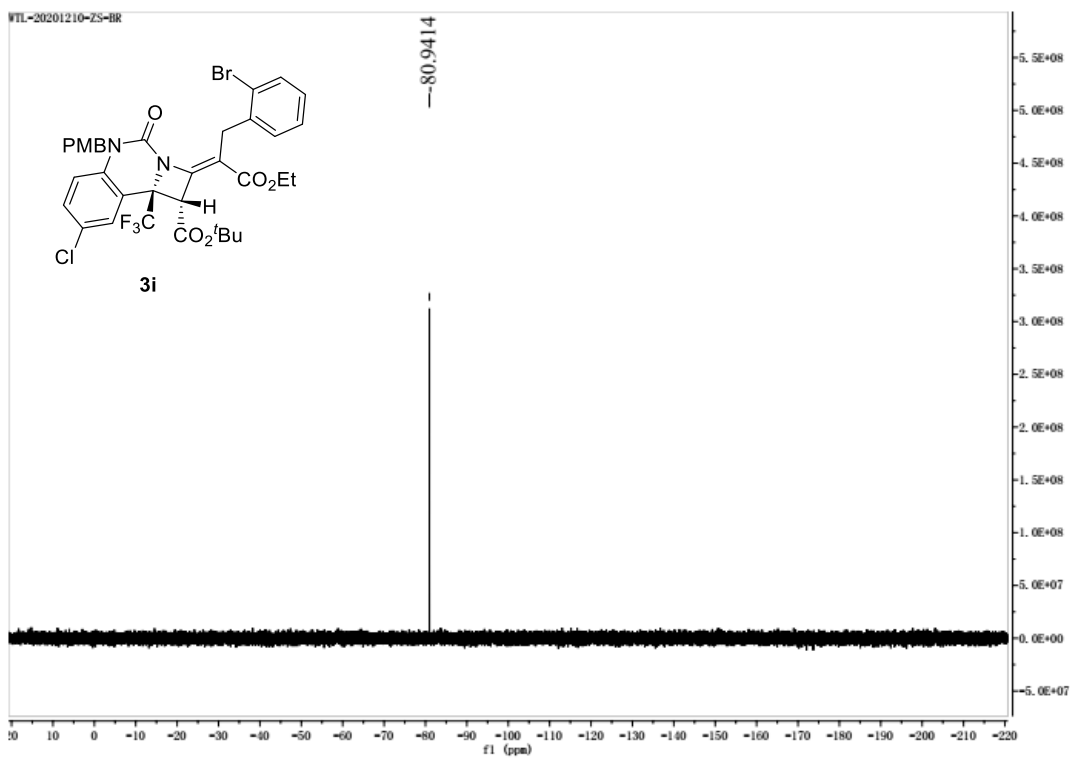

NMR of **3j** (CDCl<sub>3</sub>)

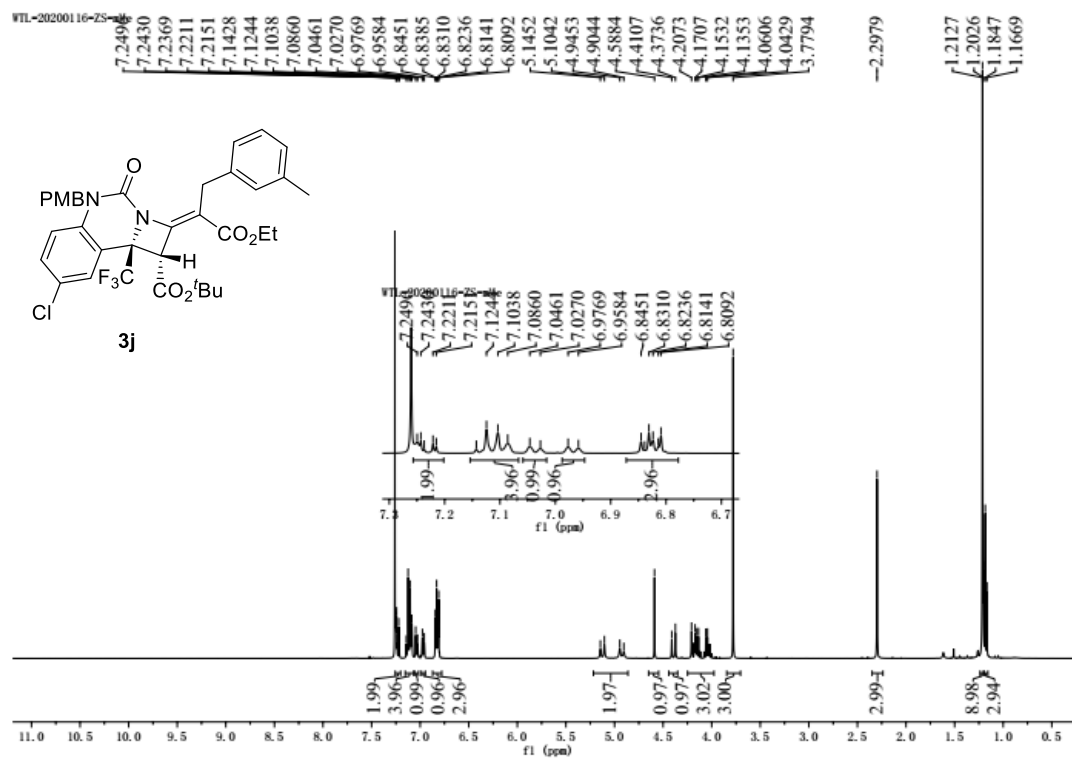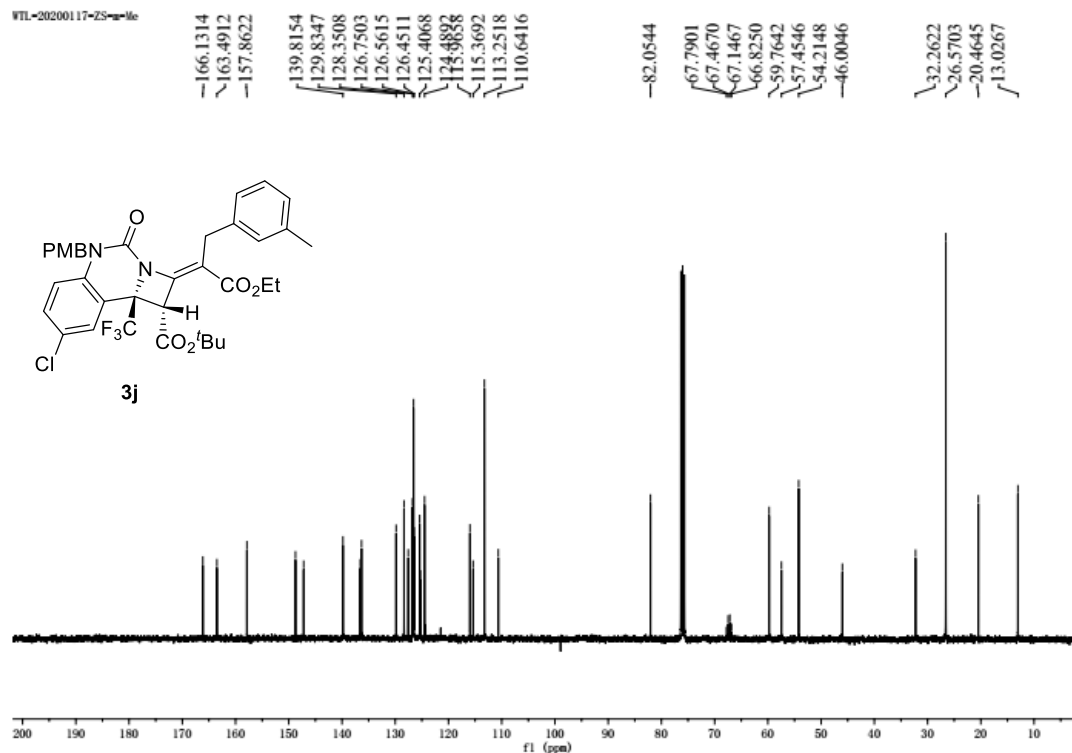

WTL-20200324-ZS-alle

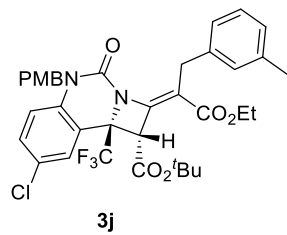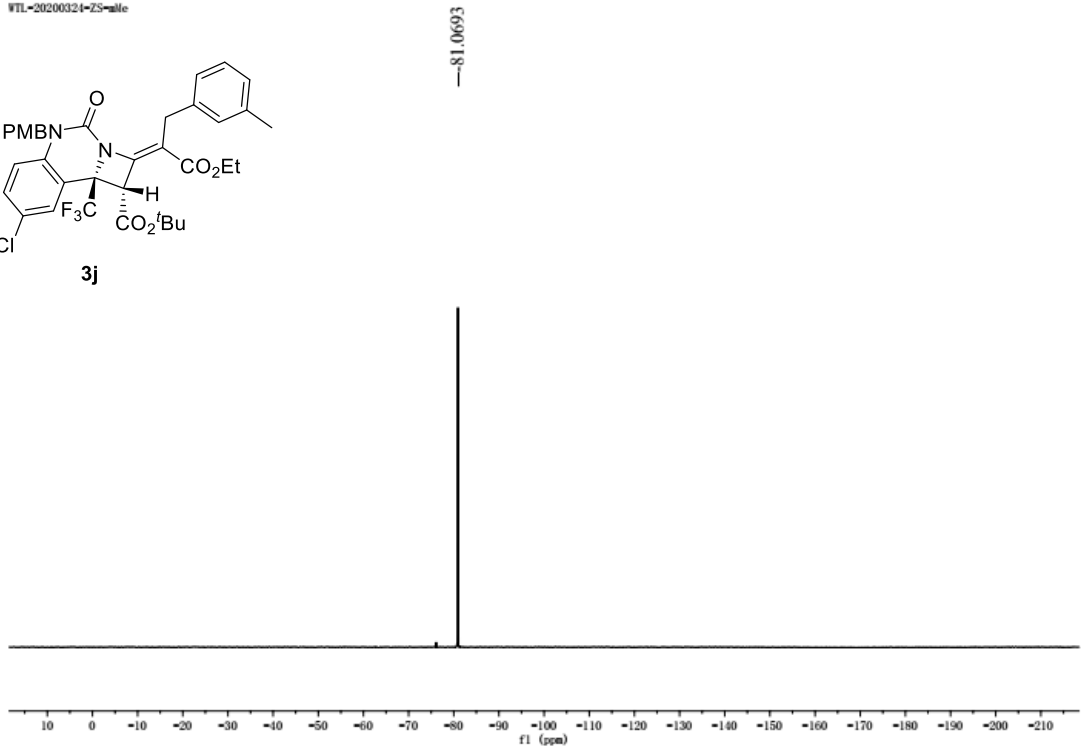

### NMR of **3k** (CDCl<sub>3</sub>)

WTL-20200116-ZS-mc1

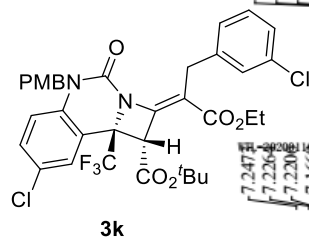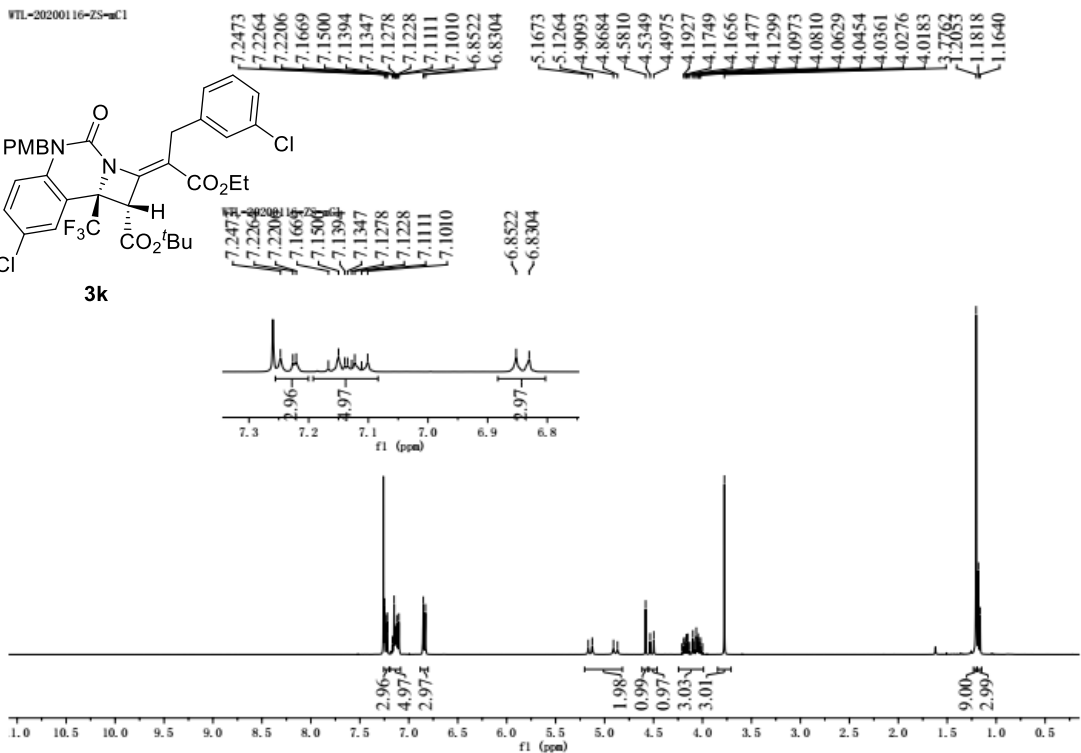

WTL-20200117-ZS-mC1

165.8578  
163.2862  
157.9088  
142.1949  
129.9190  
128.1722  
127.7186  
127.4240  
126.5054  
126.2776  
125.9277  
124.8788  
116.0361  
115.2490  
113.3467  
109.6256

82.2611

67.8343  
67.5104  
67.1903  
66.8660  
59.9198  
57.5799  
54.2205  
46.1301

32.2785  
26.5257

13.0270

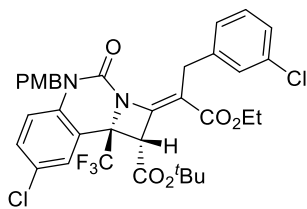

3k

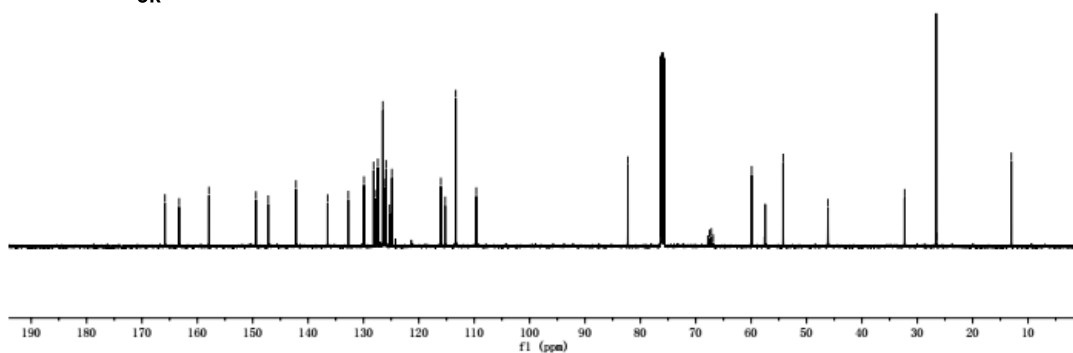

WTL-20200324-ZS-mC1

81.0667

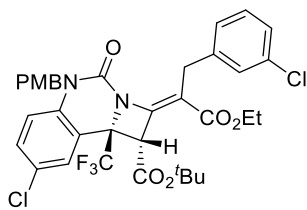

3k

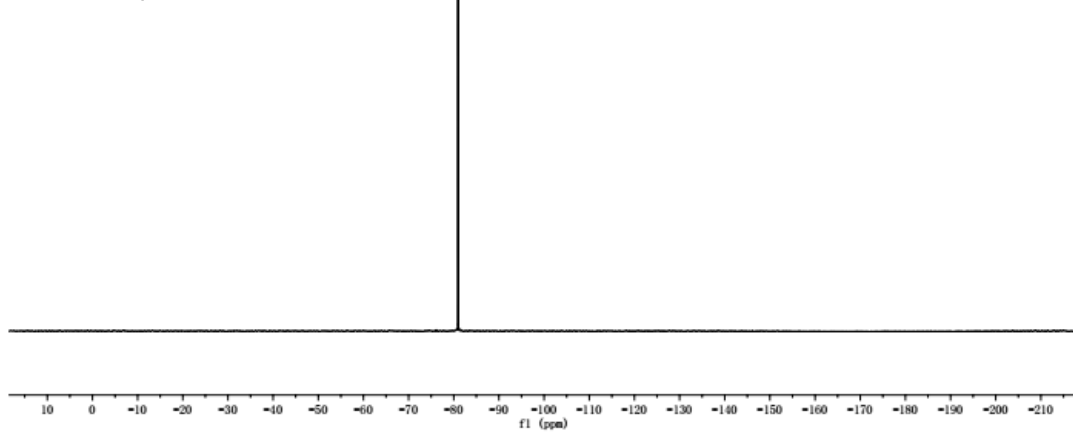

# NMR of **31** (CDCl<sub>3</sub>)

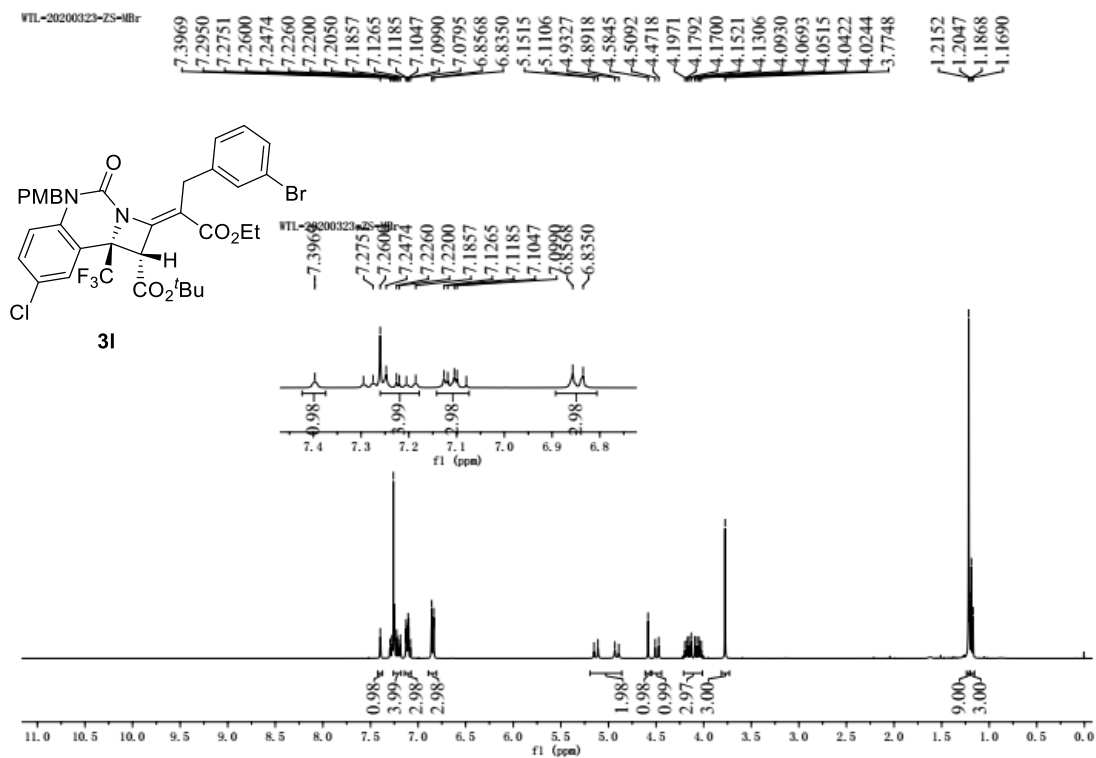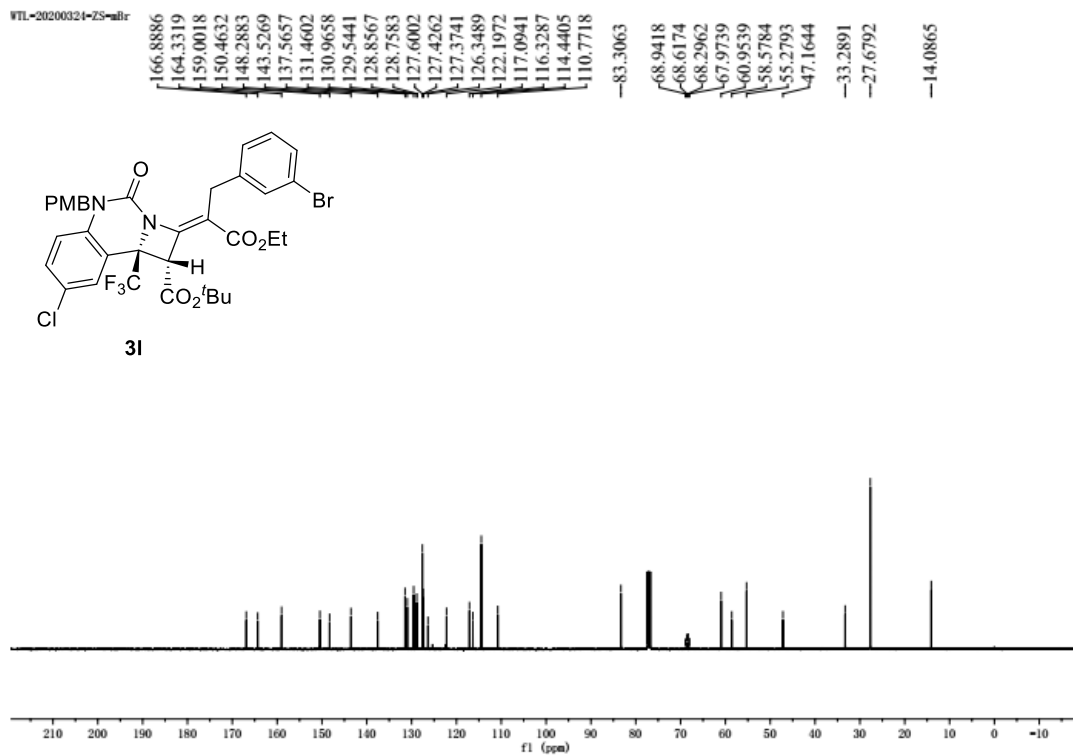

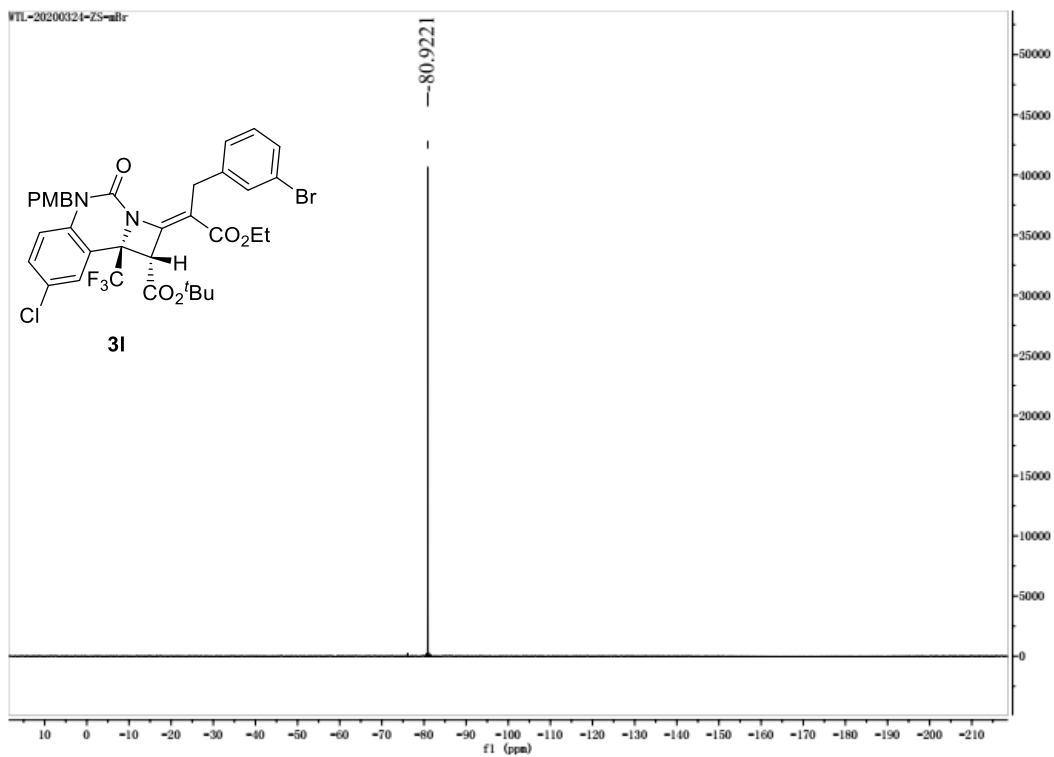

### NMR of 3m (CDCl<sub>3</sub>)

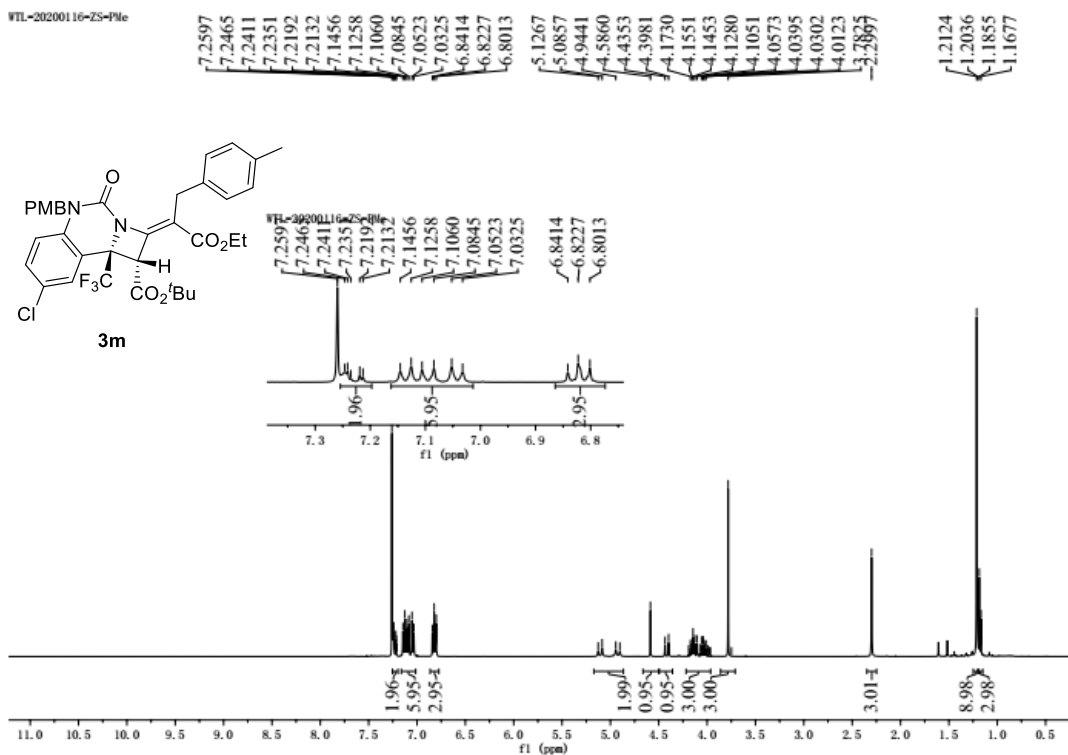



WTL-20200117-ZS-pile

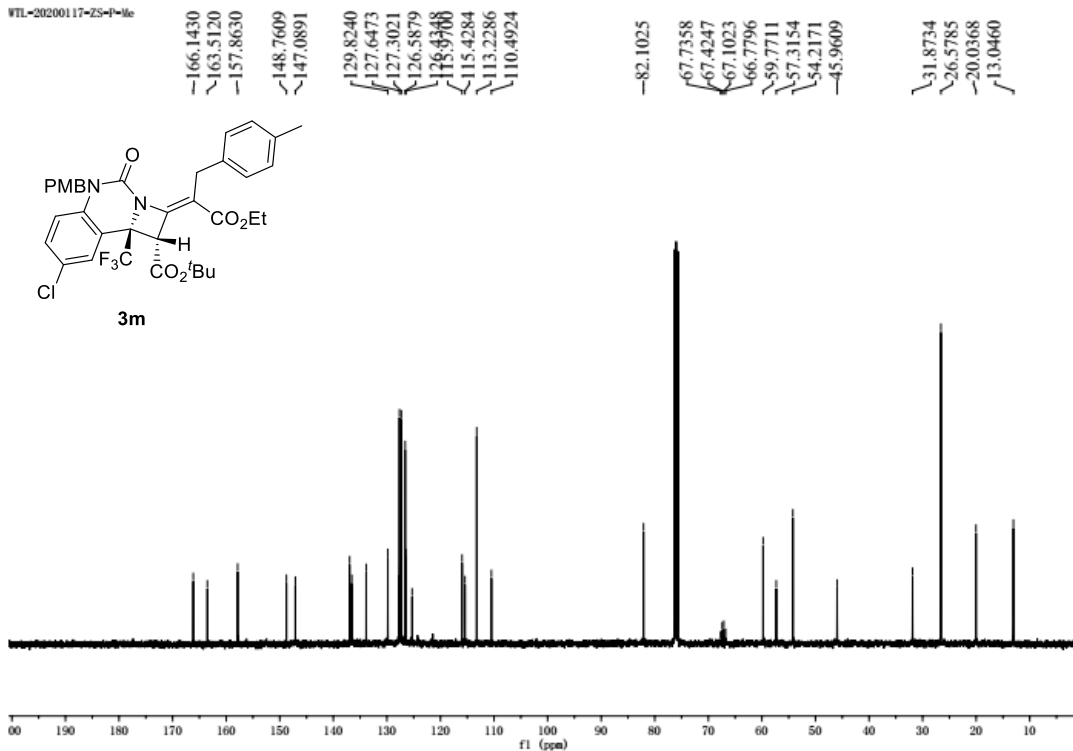

WTL-20200324-ZS-pile

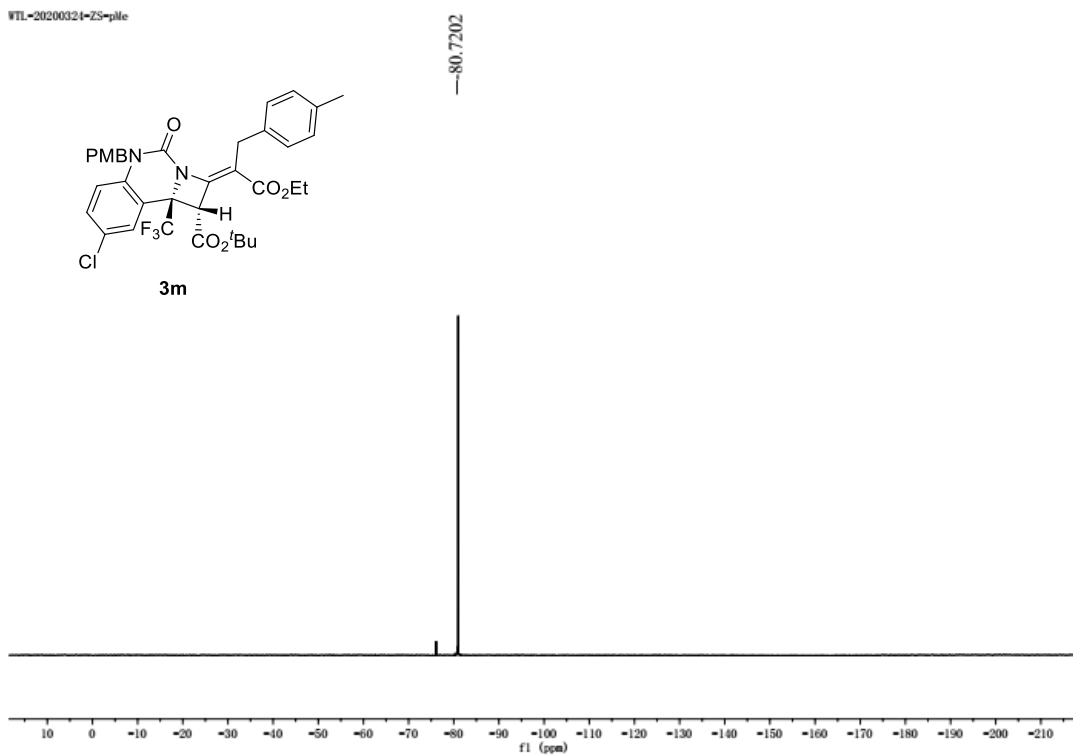

NMR of **3n** (CDCl<sub>3</sub>)

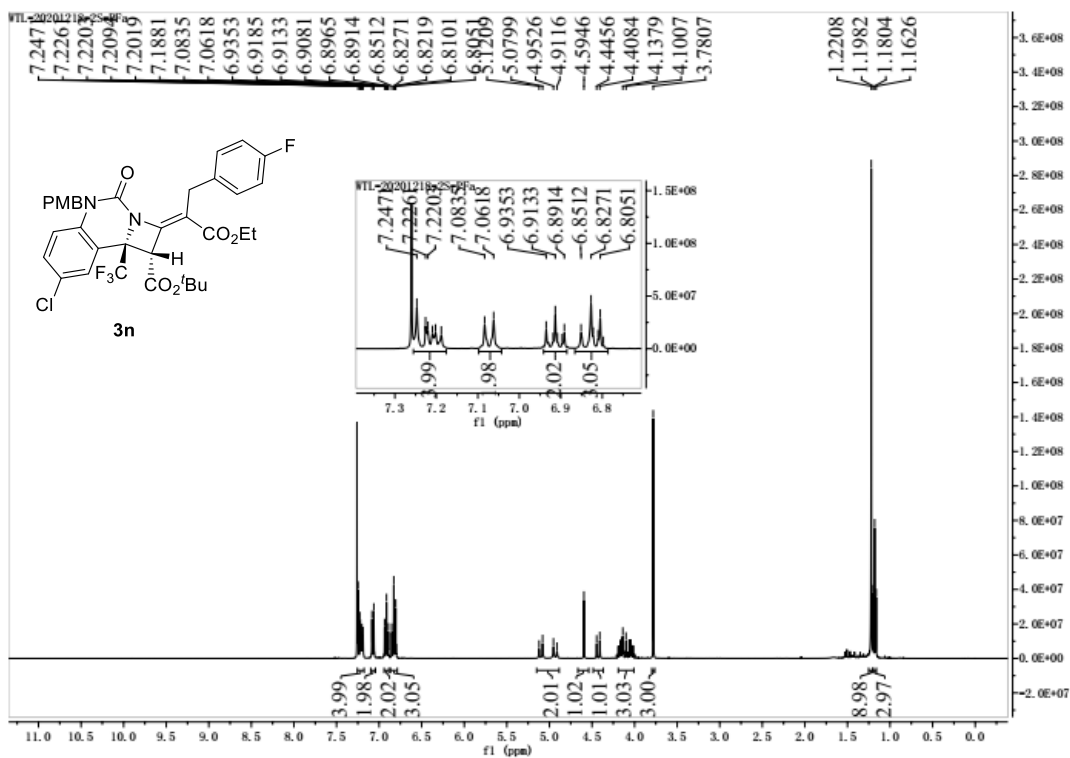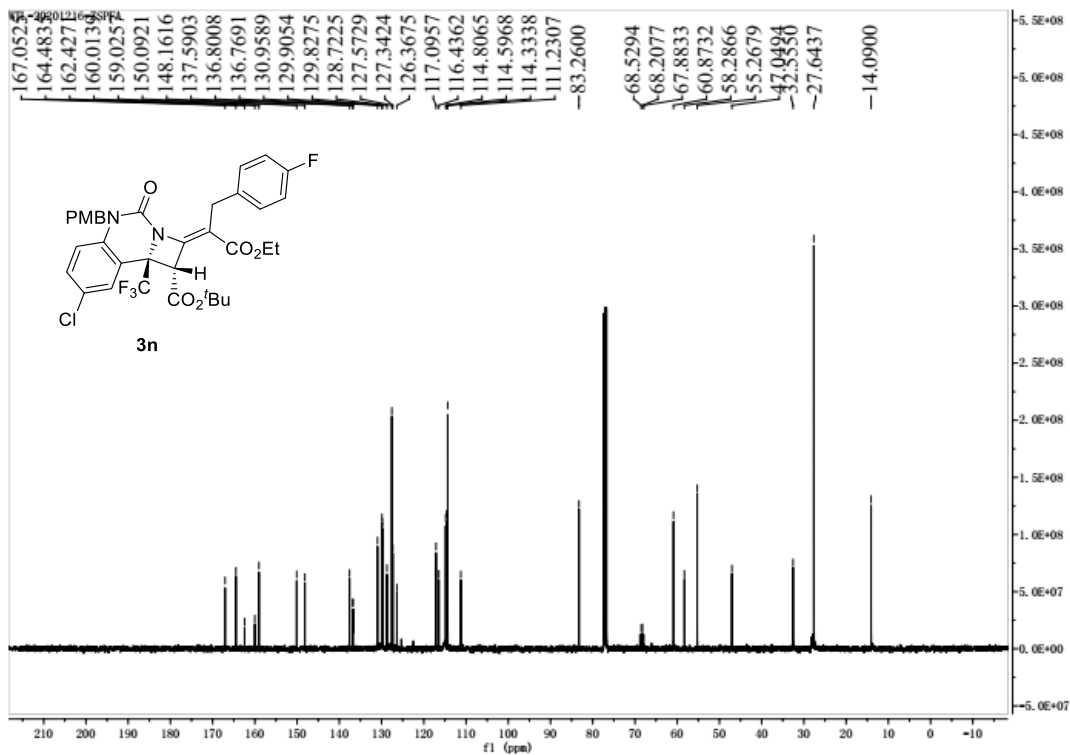

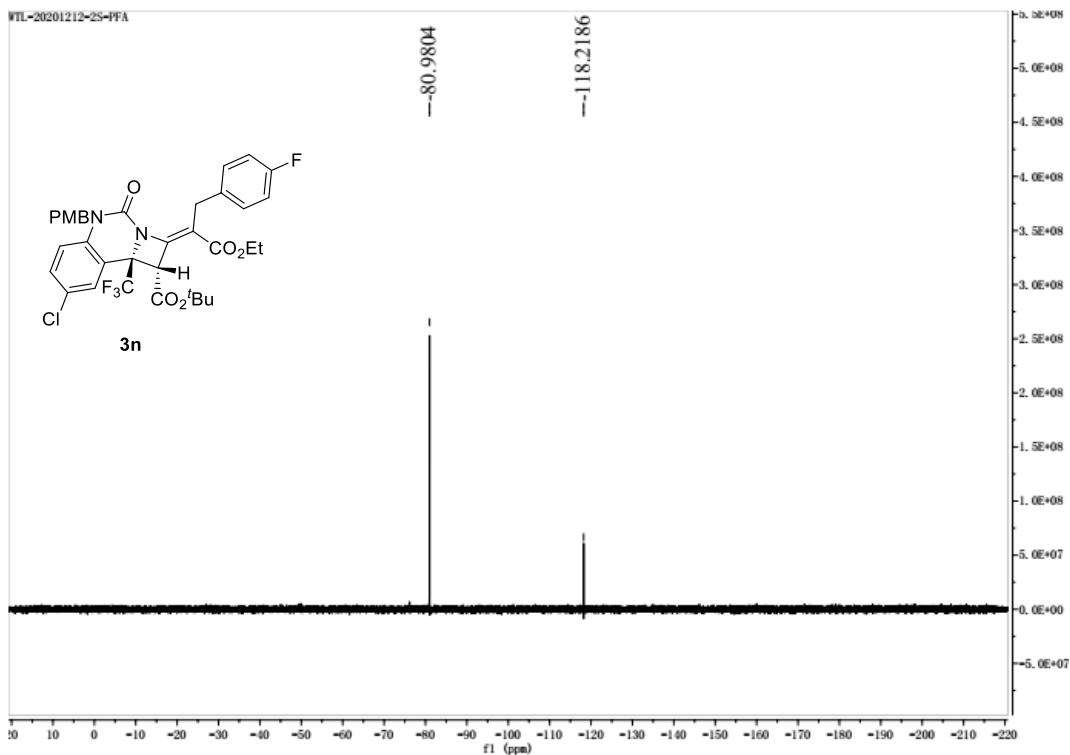

### NMR of **3o** ( $CDCl_3$ )

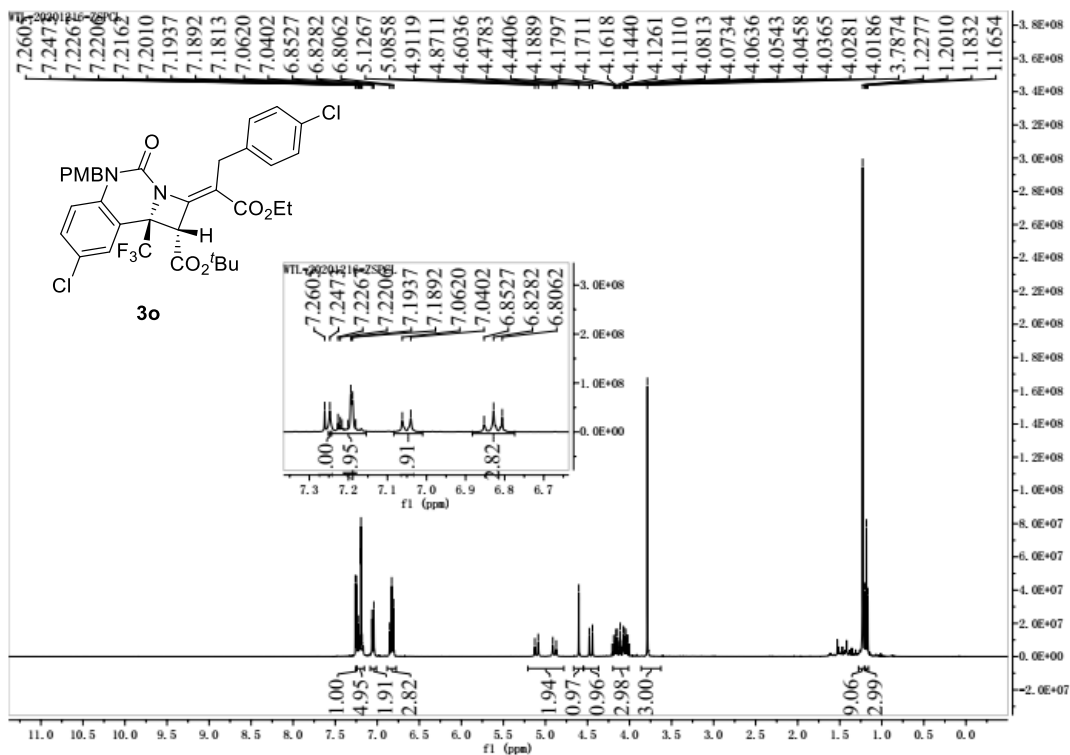

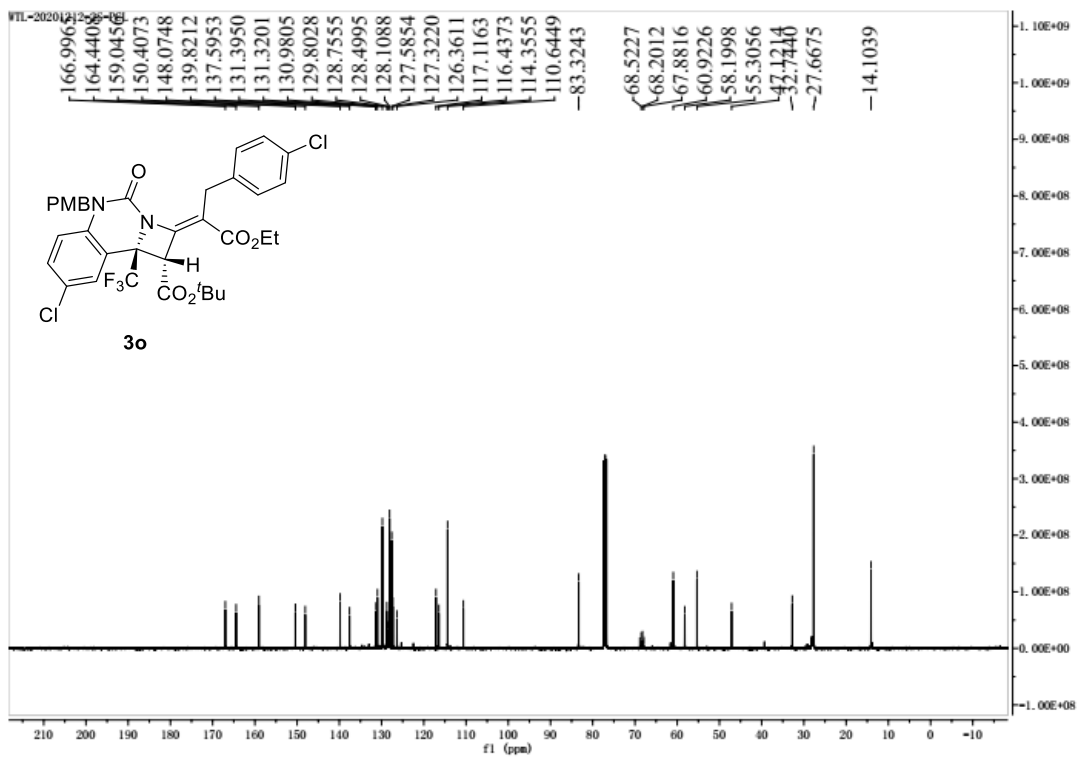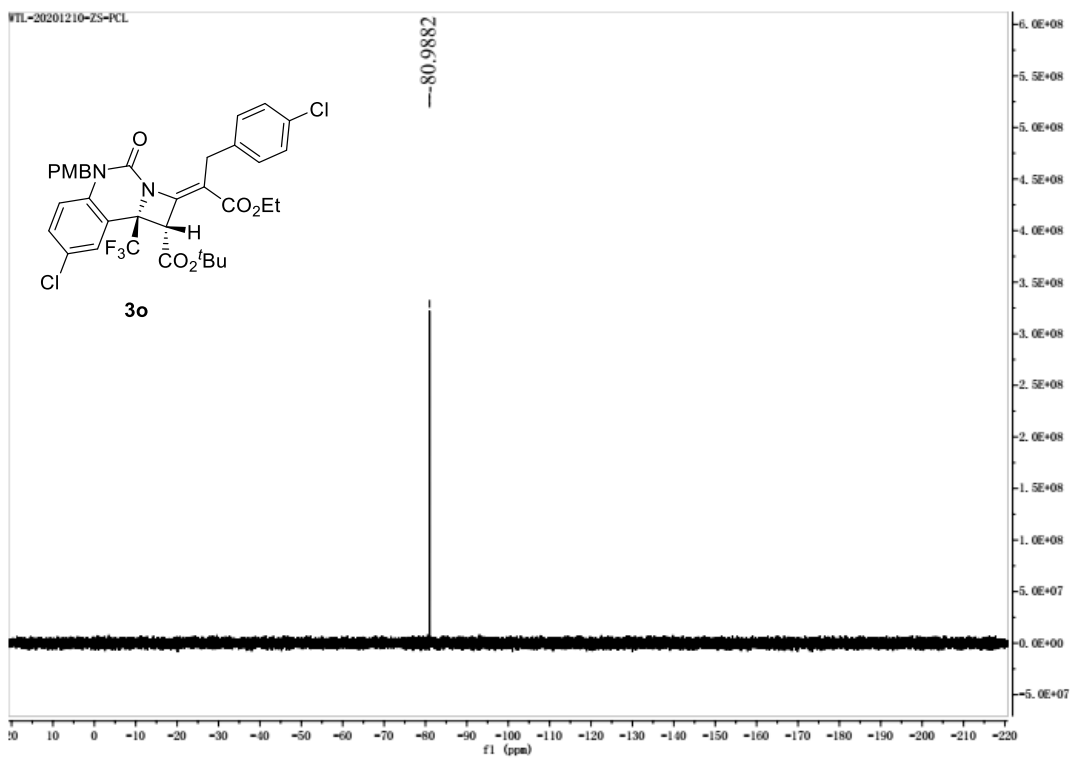

NMR of **3p** (CDCl<sub>3</sub>)

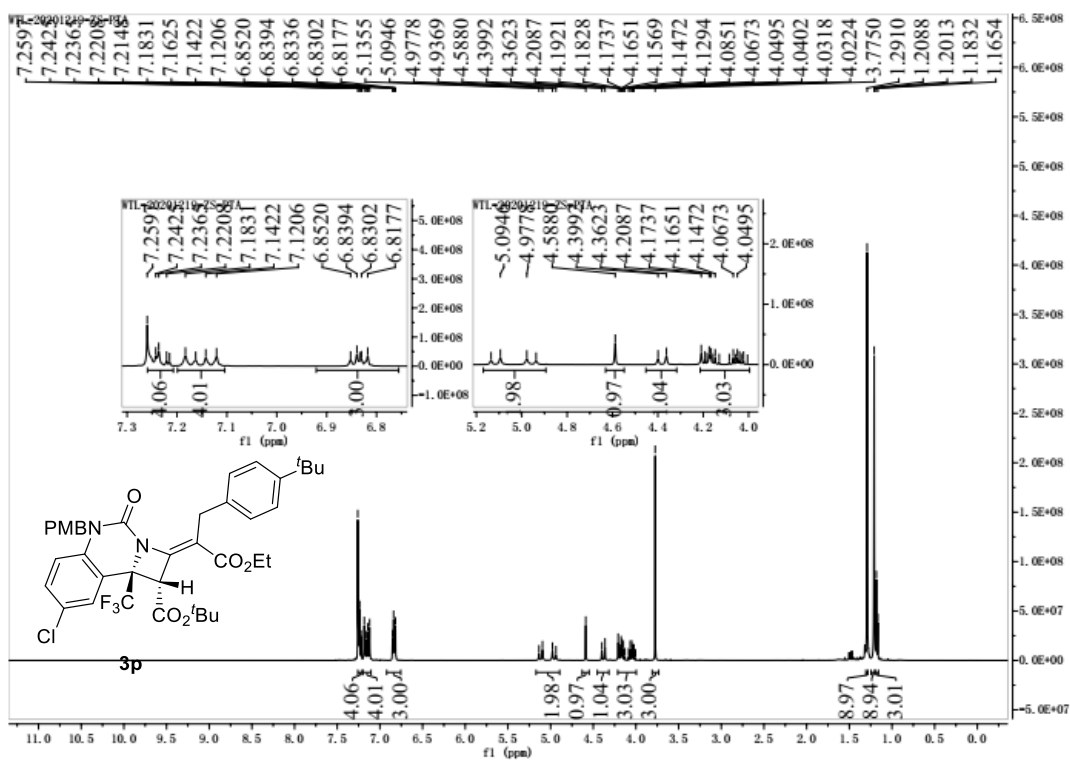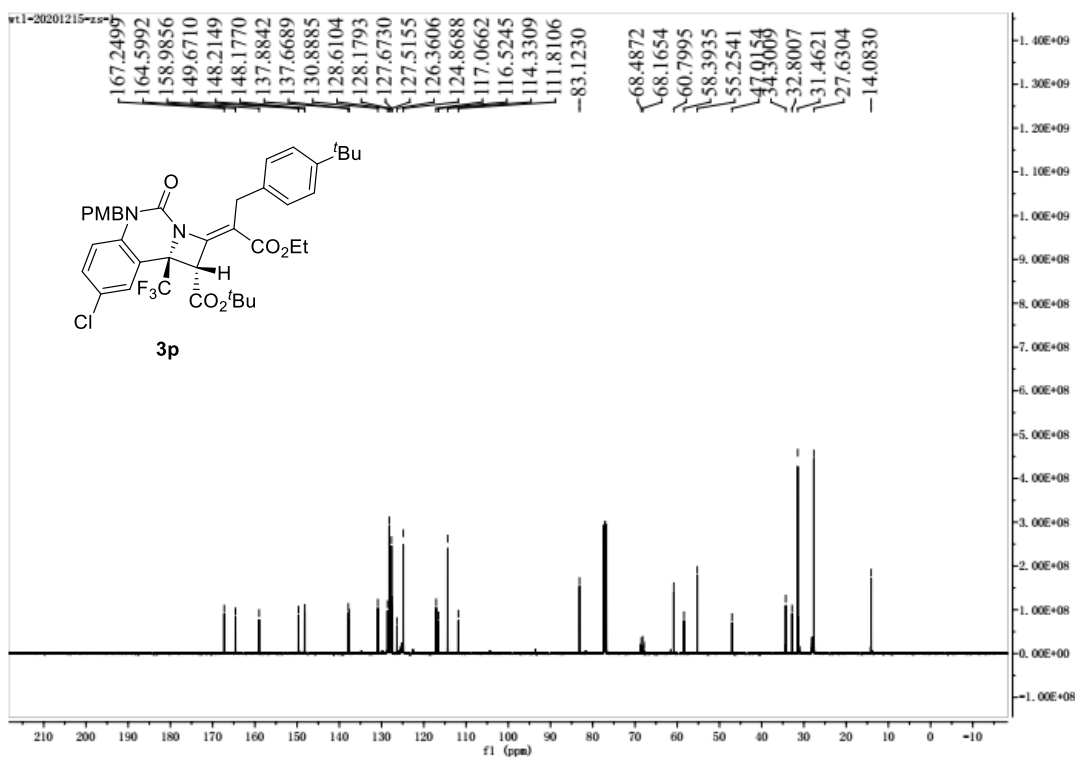

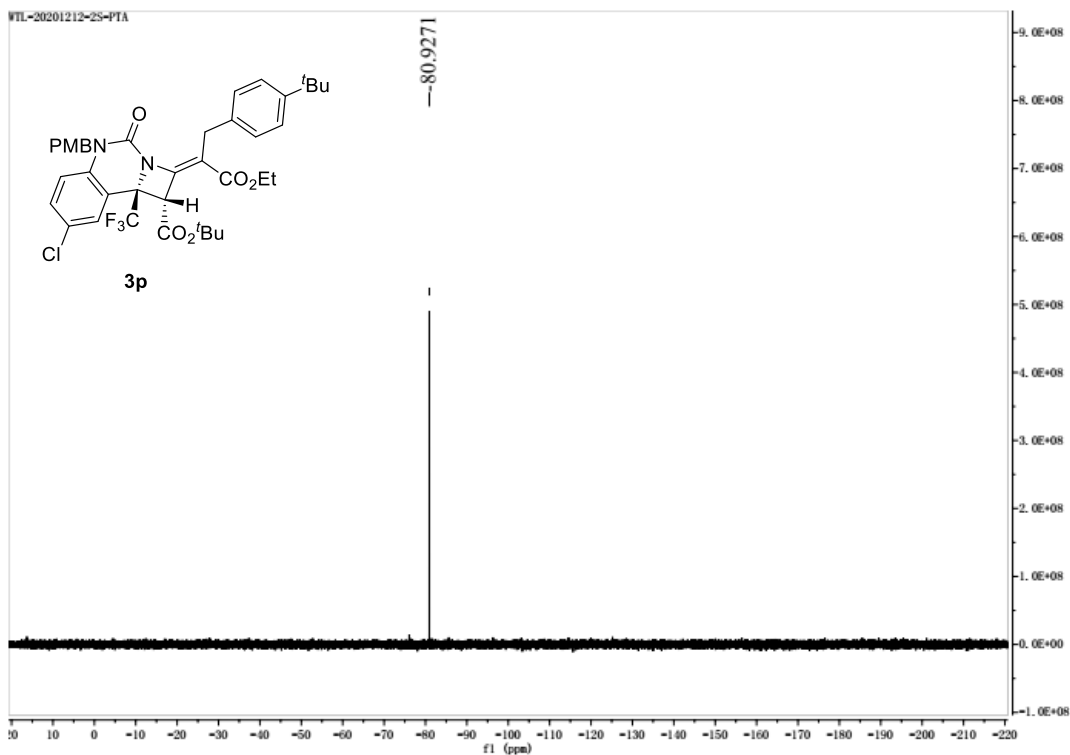

### NMR of **3q** (CDCl<sub>3</sub>)

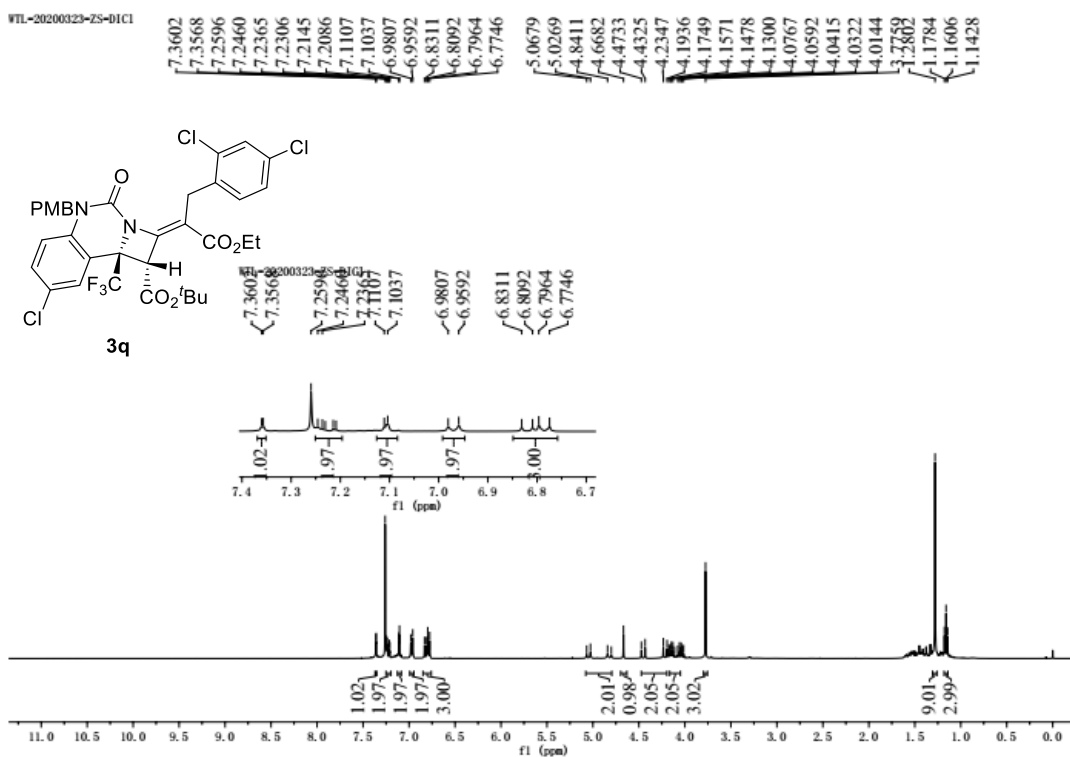

WTL-20200324-ZS-diCl

166.8452  
164.4250  
159.0192  
151.6682  
147.8759  
138.1406  
131.6861  
131.0156  
129.7190  
128.9486  
128.7354  
127.6279  
127.3078  
126.4966  
117.1361  
114.3110  
108.9667  
83.8067  
69.0060  
68.6851  
68.3593  
68.1411  
60.9764  
58.0636  
55.3016  
47.1336  
30.8806  
27.7609  
14.0648

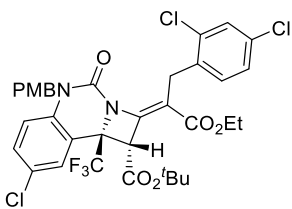

3q

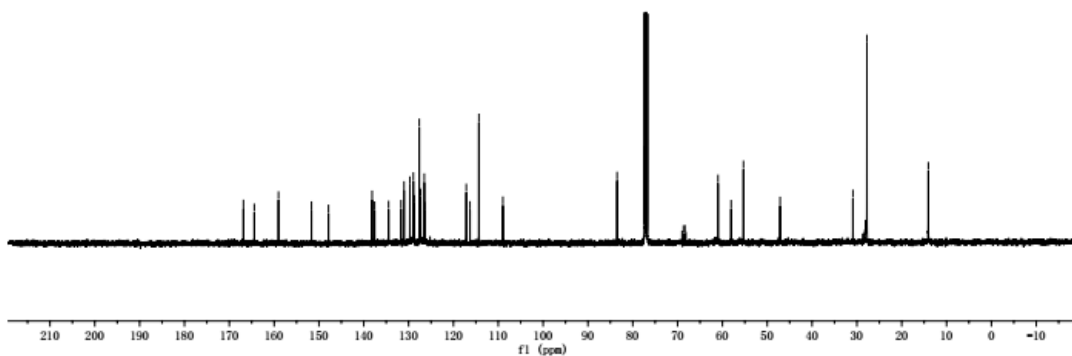

WTL-20200324-ZS-diCl

80.7277

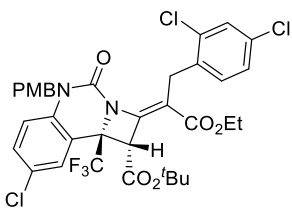

3q

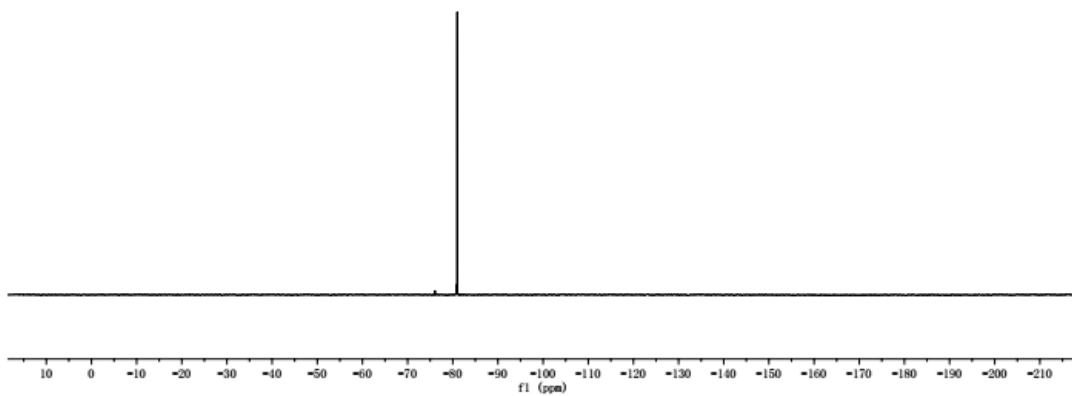

NMR of **3r** (CDCl<sub>3</sub>)

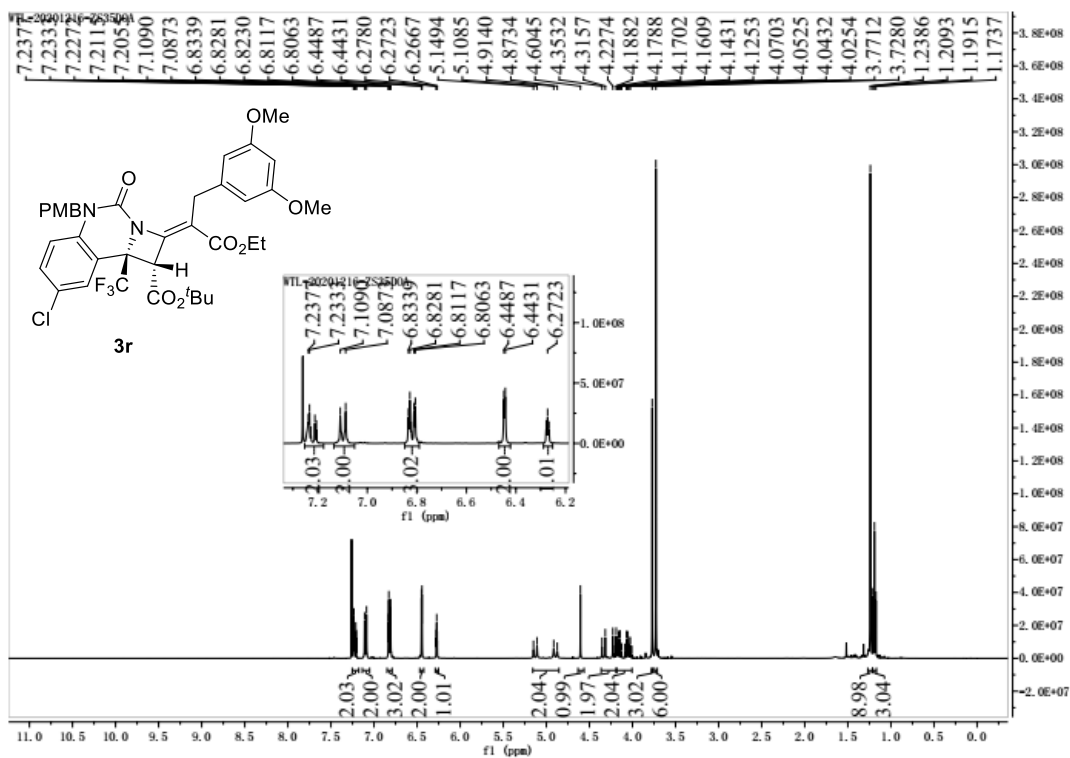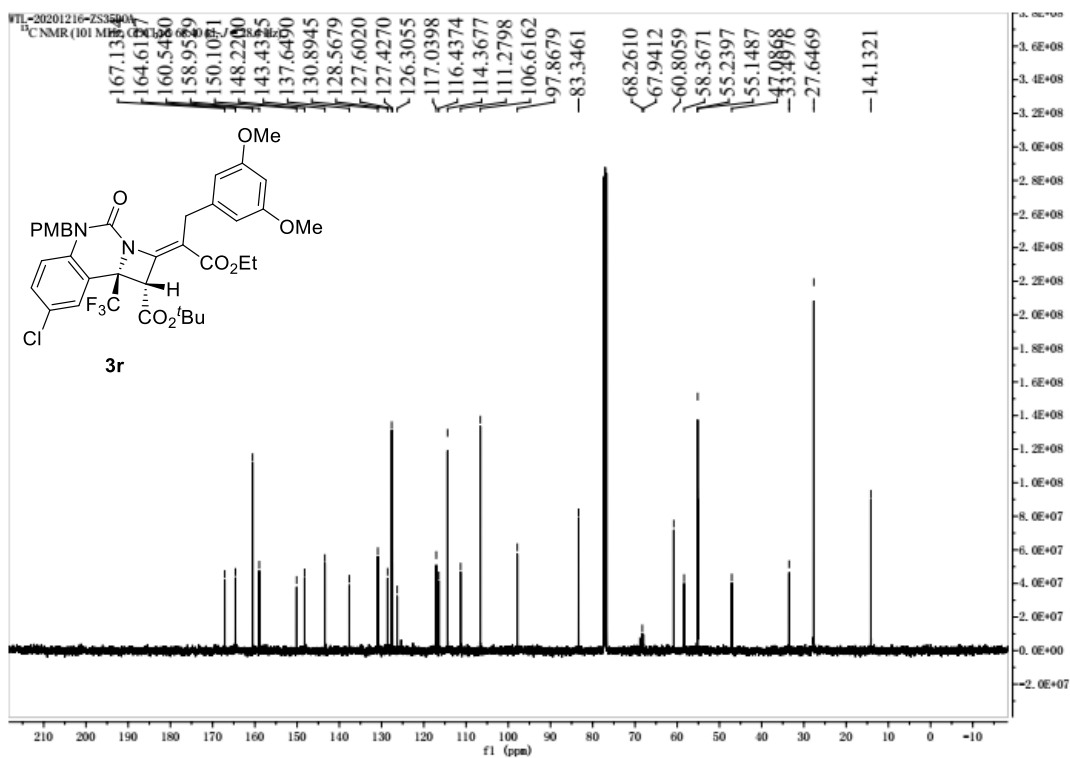



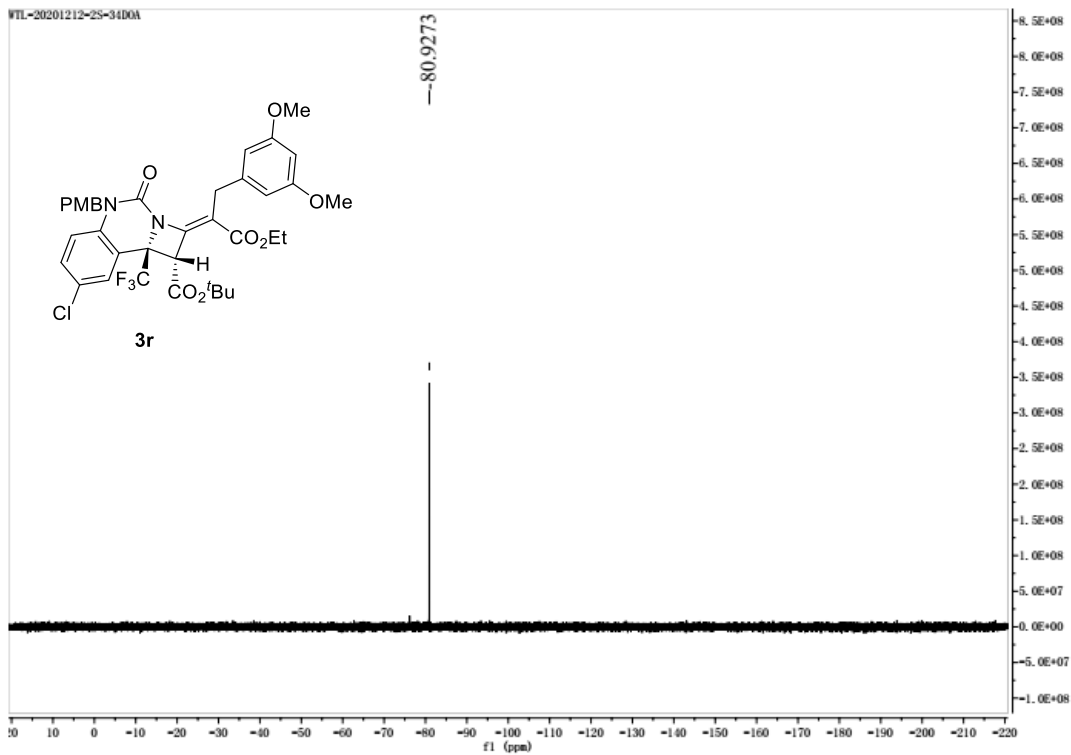

NMR of **3s** ( $CDCl_3$ )

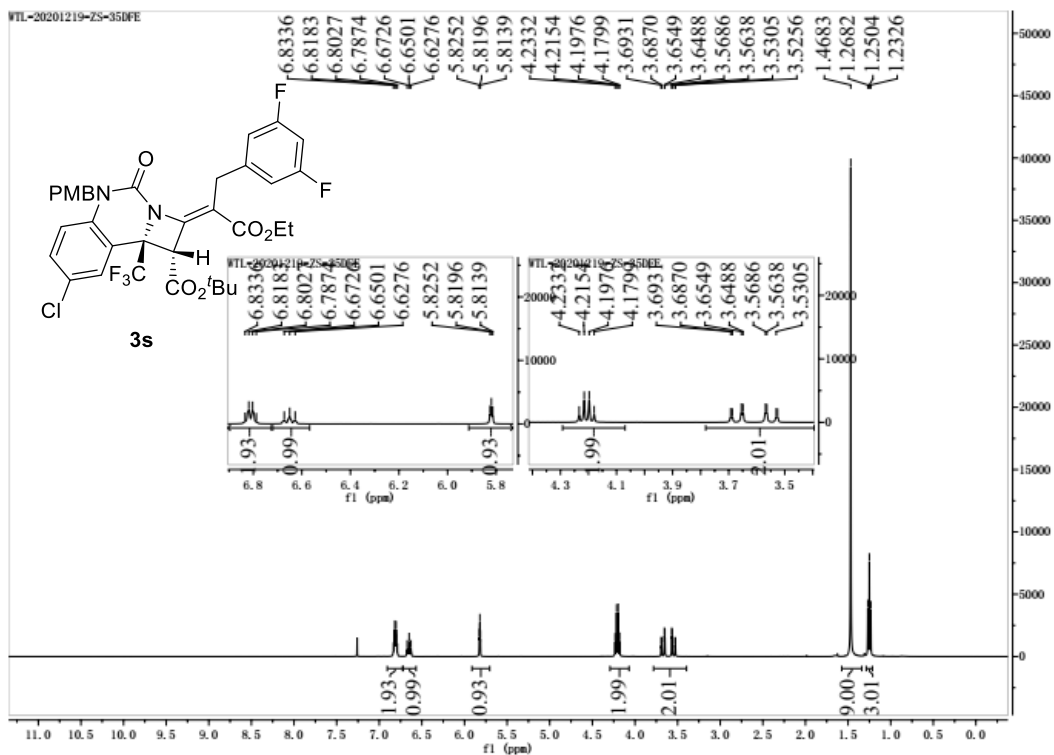

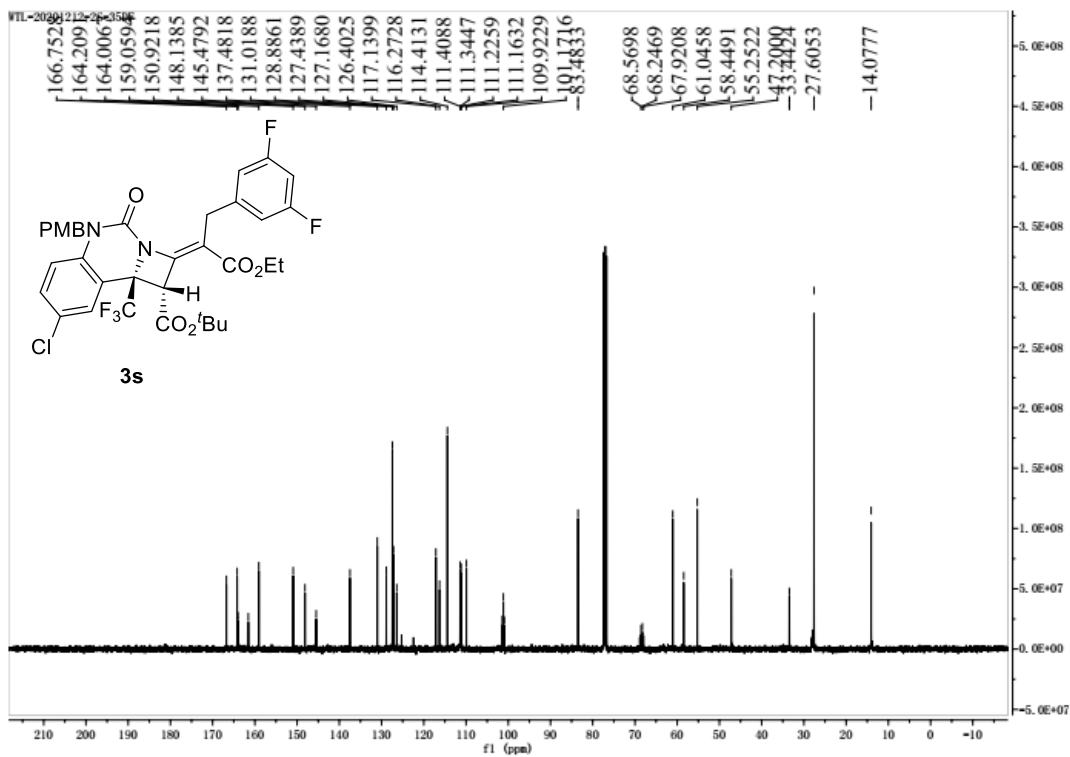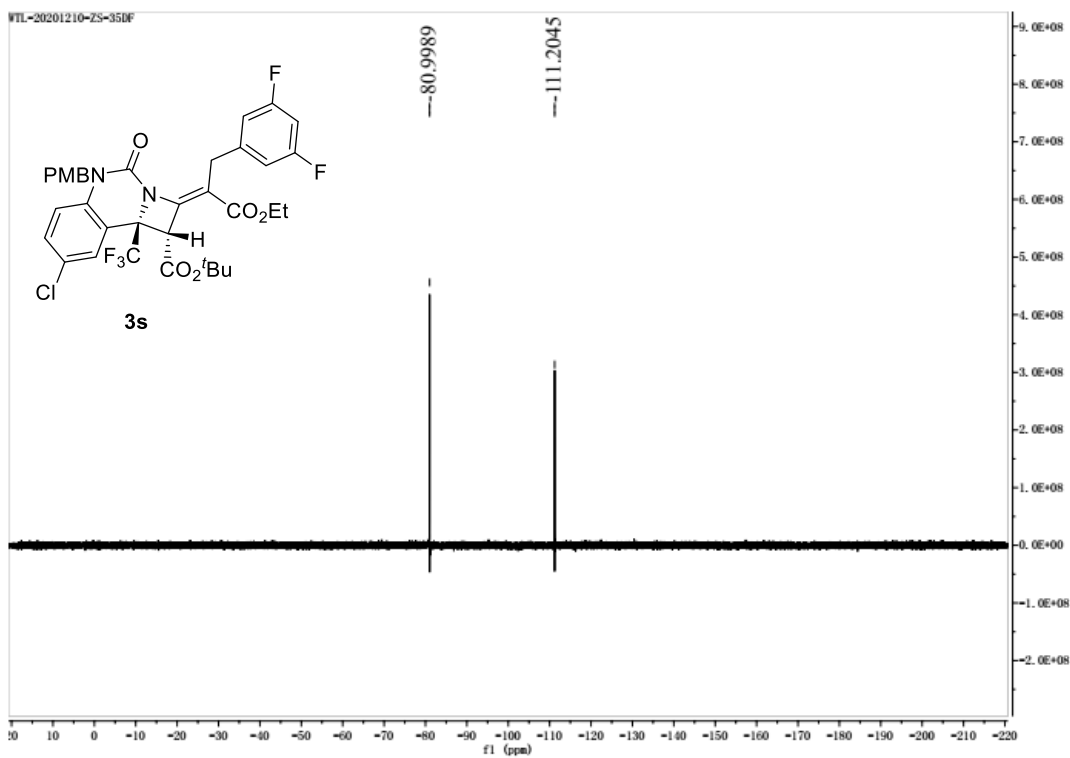

NMR of **3t** (CDCl<sub>3</sub>)

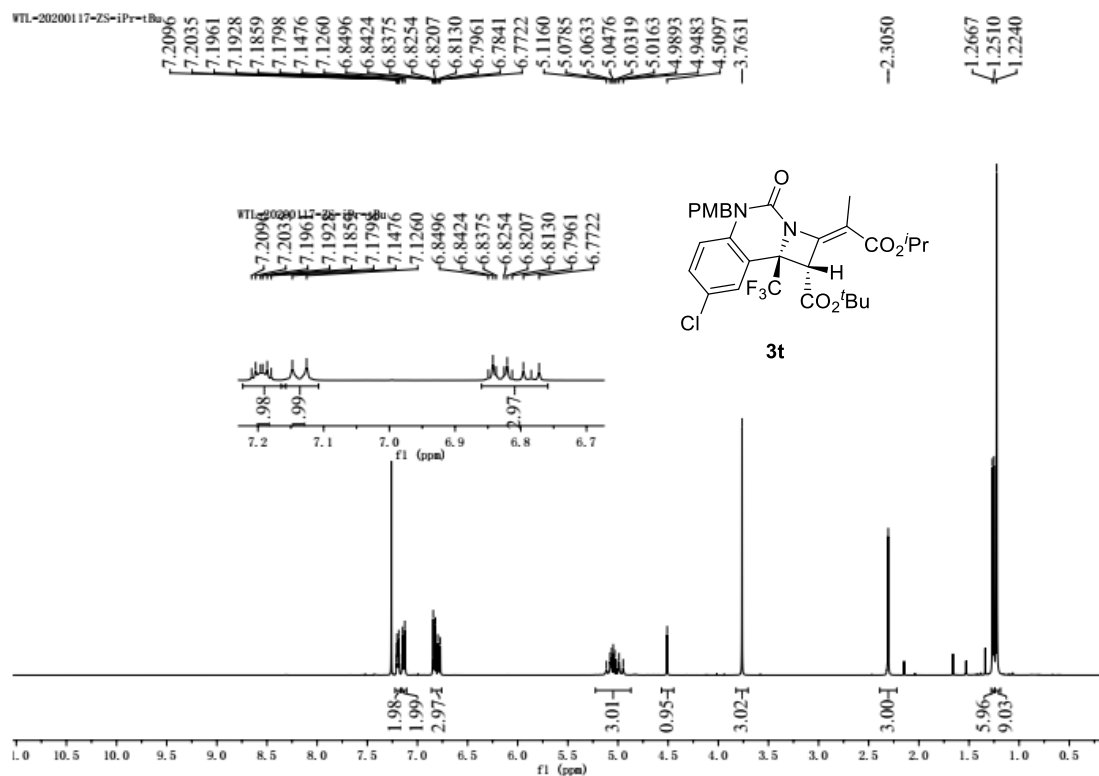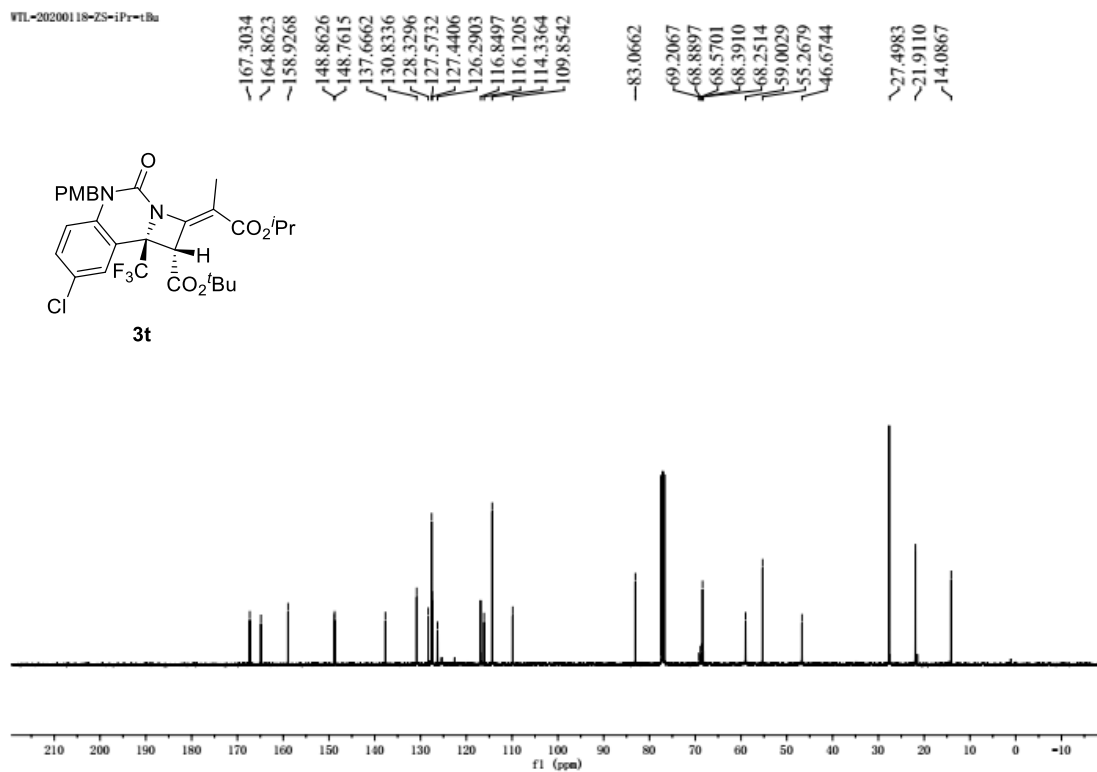

WTL-20200324-ZS-iPr-tBu

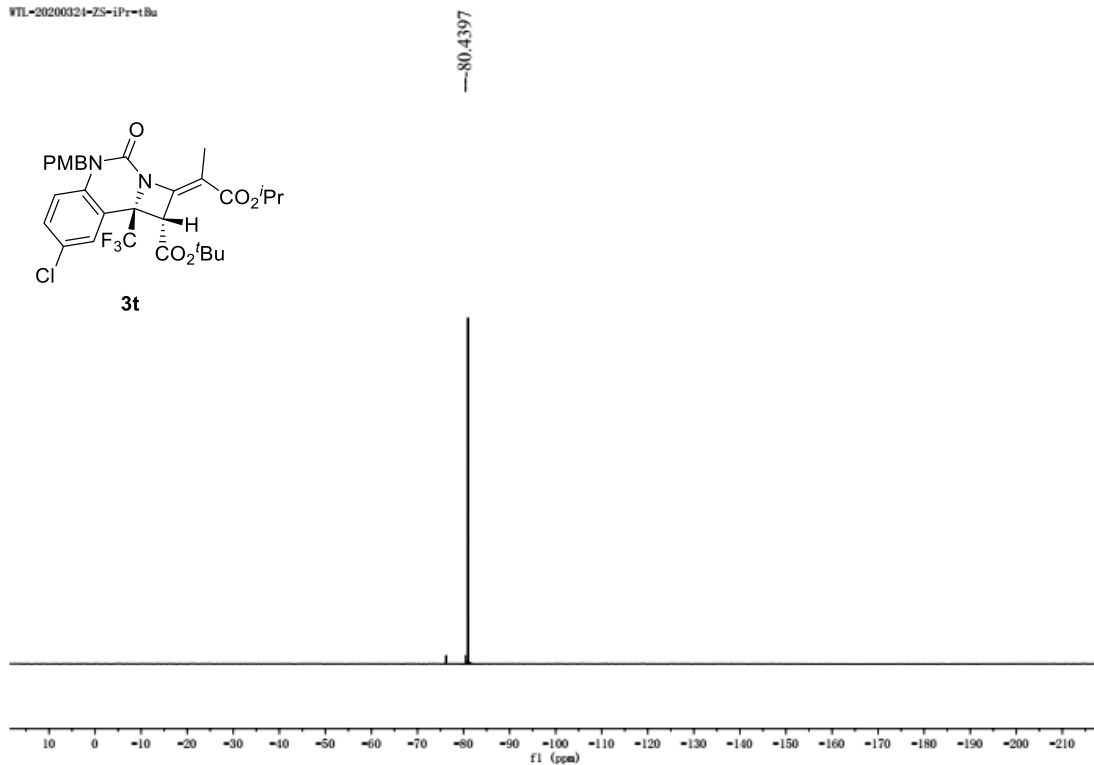

### NMR of **3u** (CDCl<sub>3</sub>)

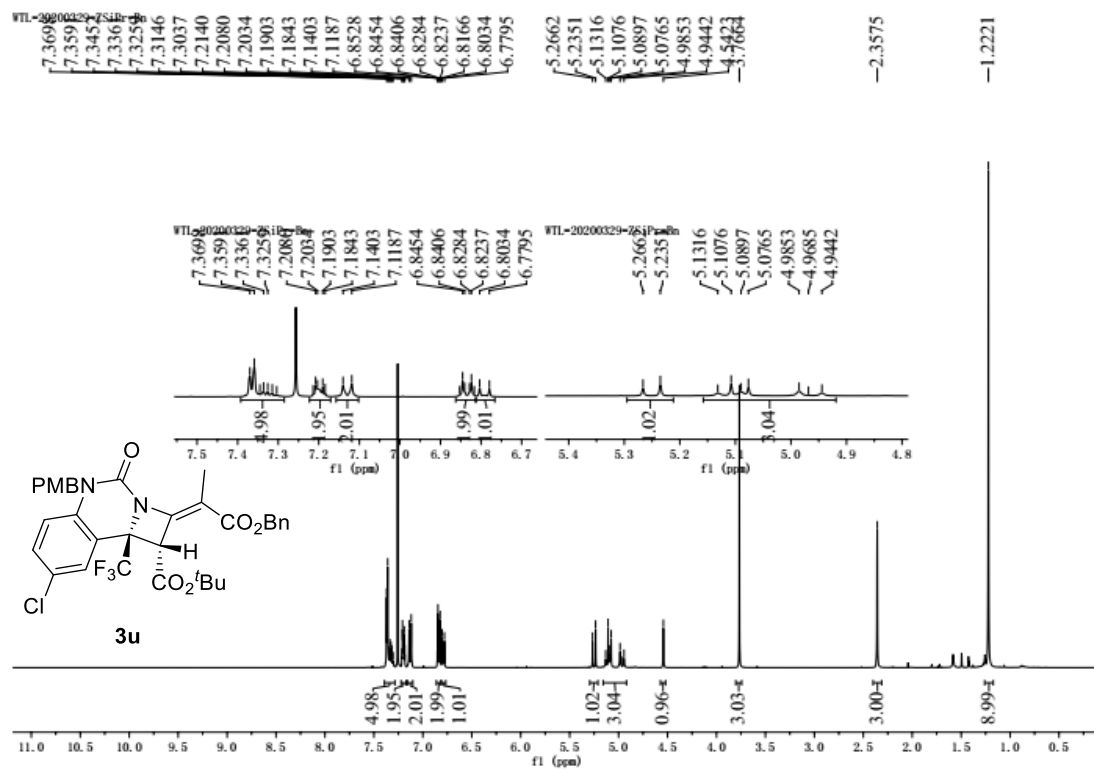

WTL-20200329-ZSiPr-Bn-C

167.6287  
164.7409  
158.9675  
149.5276  
148.7109  
137.6247  
130.8501  
128.5541  
128.3710  
128.1879  
128.1480  
127.5699  
127.3715  
117.0021  
116.2220  
114.3711  
108.9801  
85.1886  
68.9960  
68.8631  
68.5434  
68.3173  
66.2896  
58.6369  
55.2726  
46.6668  
27.6409  
13.9564

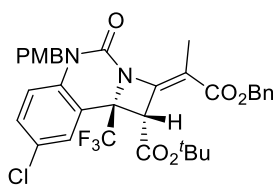

3u

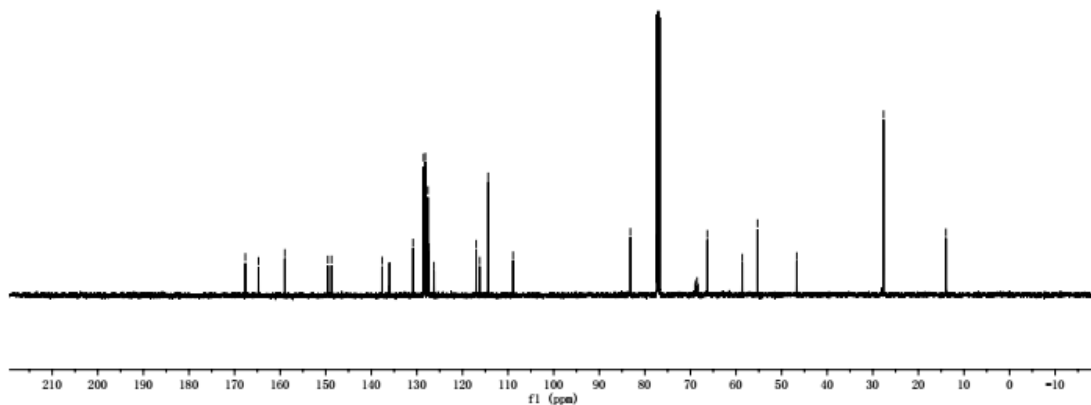

WTL-20200329-ZSiPr-Bn

80.7212

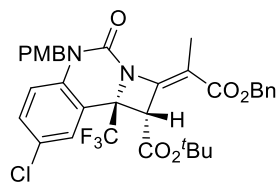

3u

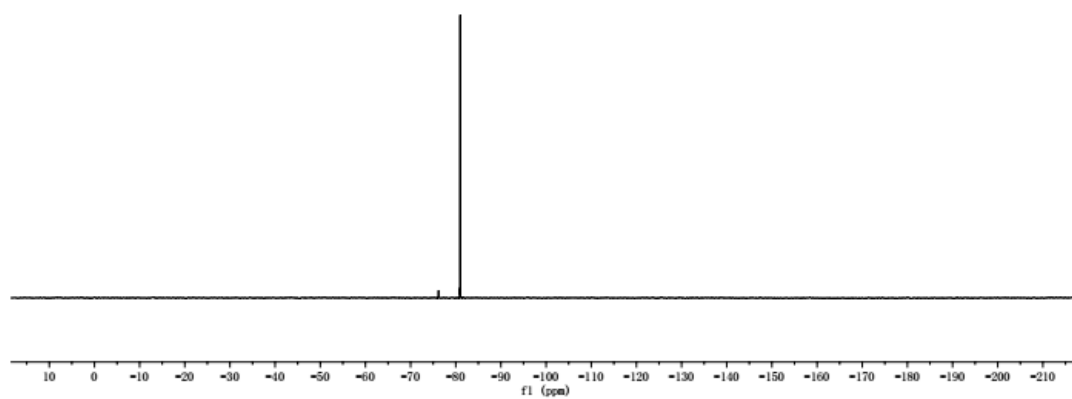

# NMR of **3v** (CDCl<sub>3</sub>)

WTL-20200117-ZS-methyl-ester

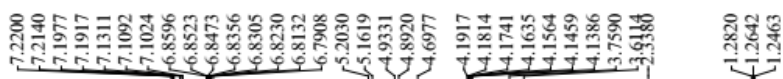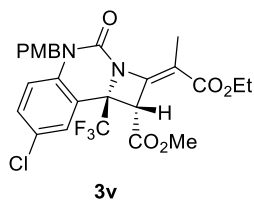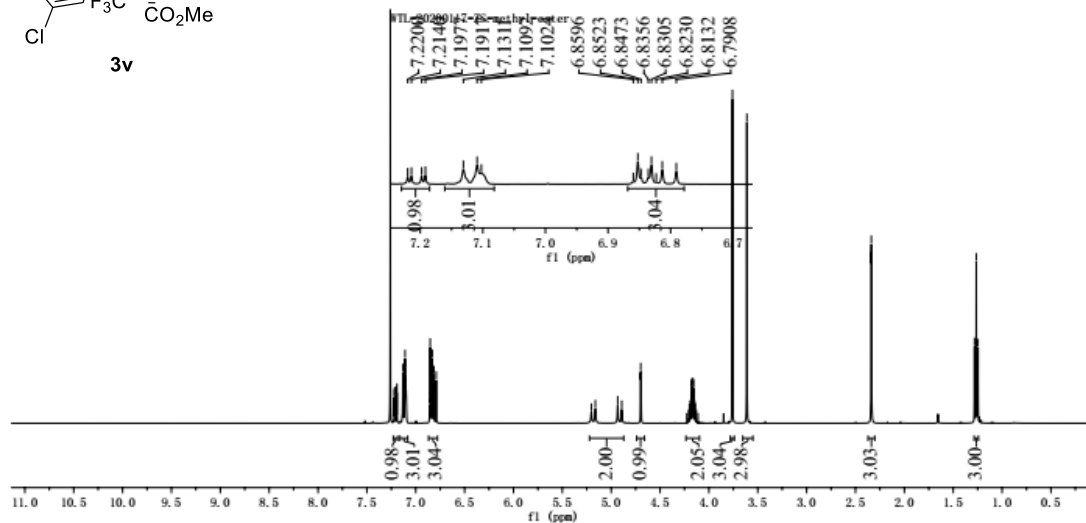

WTL-20200118-ZS-methyl-ester

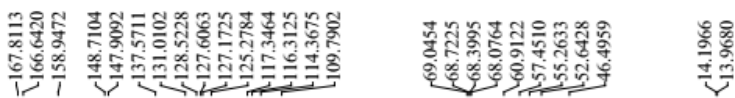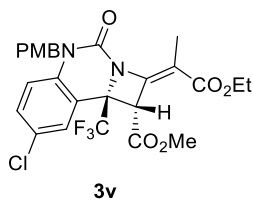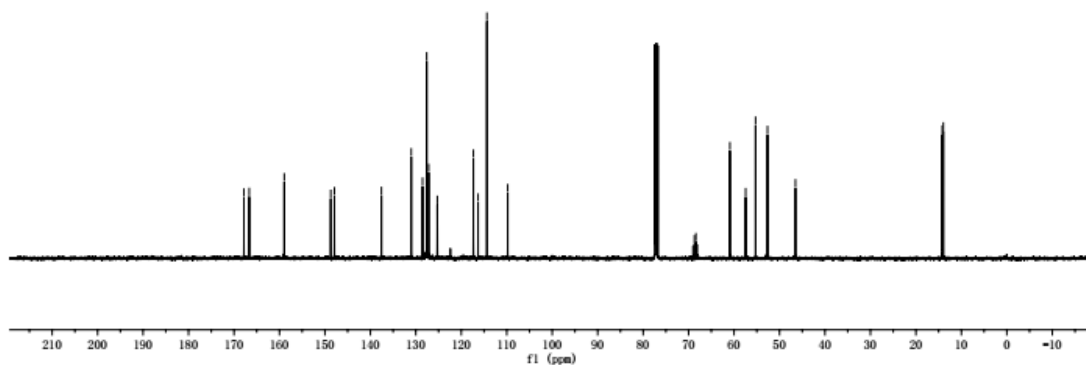

WTL-20200324-ZS=leether

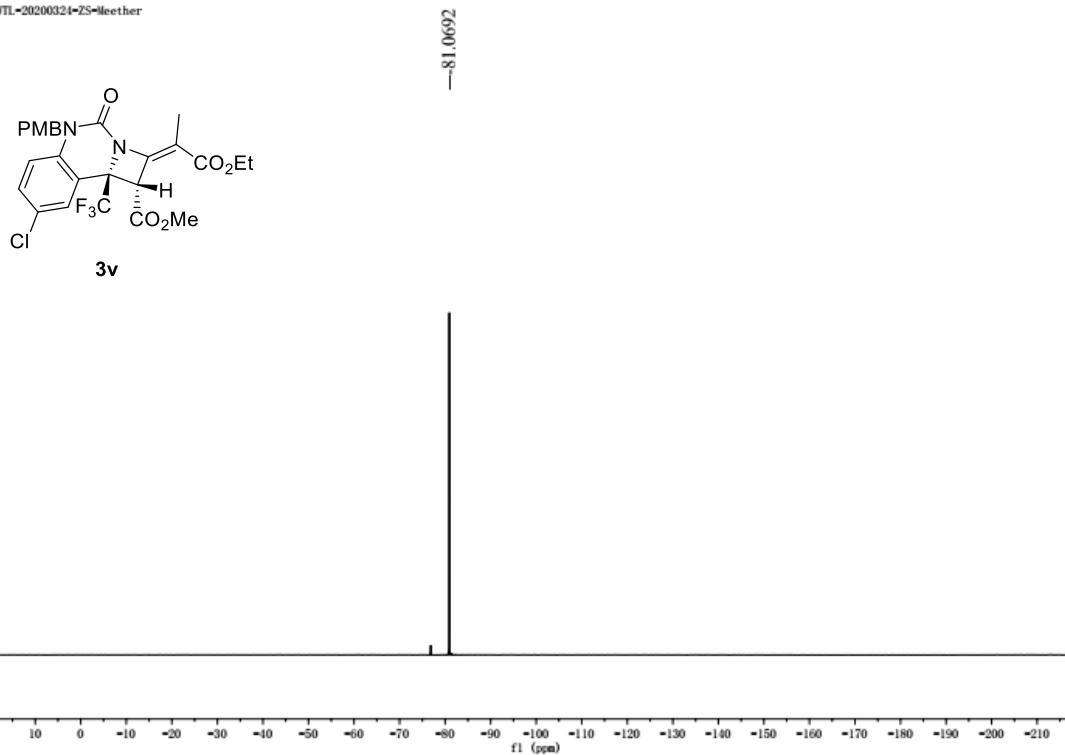

### NMR of **3w** (CDCl<sub>3</sub>)

WTL-20200117-ZS=ethyl-ester

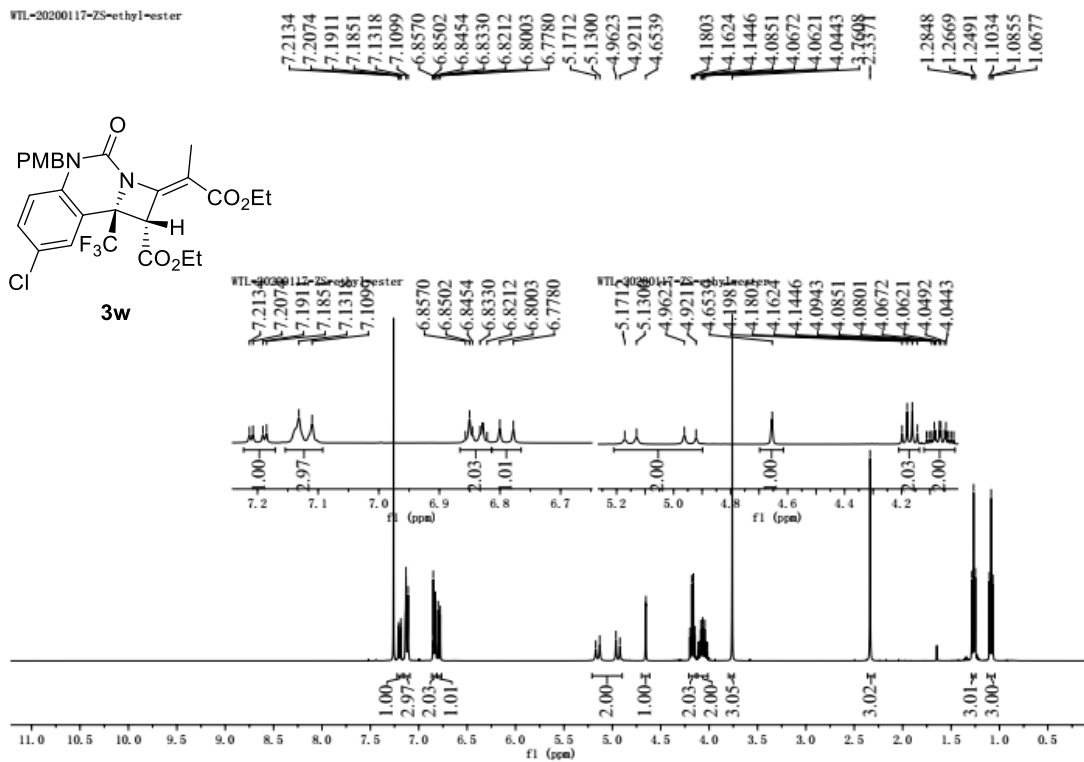

WTL-20200118-ZS-ethyl-ester

167.7442  
166.0901  
158.9408  
148.7294  
148.1342  
137.6048  
130.9669  
128.4284  
127.5707  
125.5895  
117.2334  
116.1682  
114.3559  
109.8741  
69.0504  
68.7295  
68.4069  
68.0867  
62.0043  
60.8732  
57.7533  
55.2680  
46.5289  
14.2166  
14.0704  
13.8748

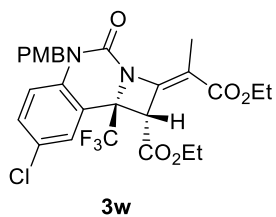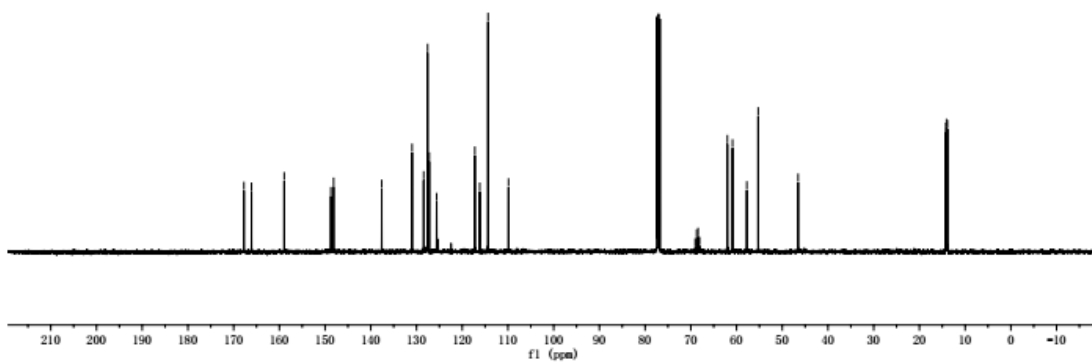

WTL-20200324-ZS-ethylether

-80.7184

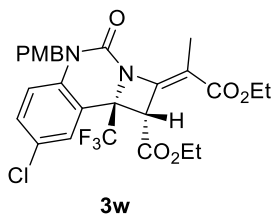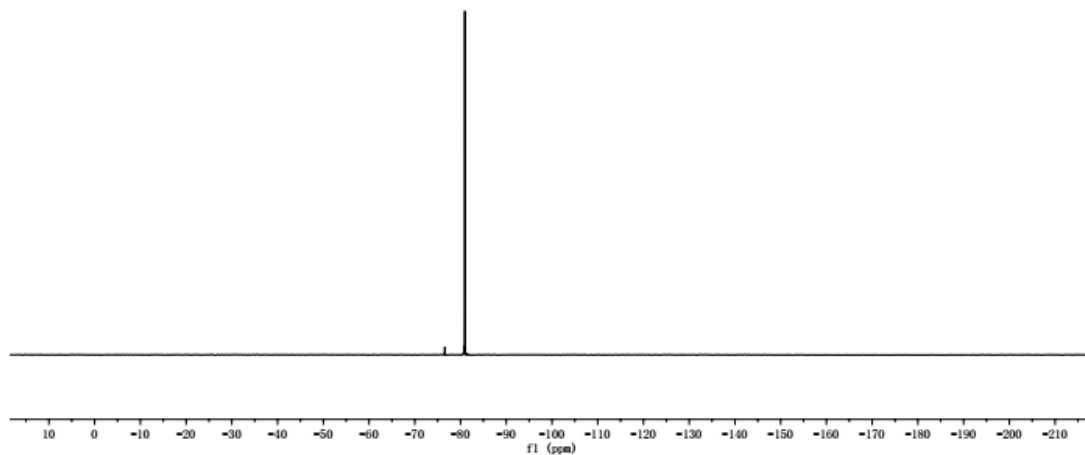



NMR of 3x (CDCl<sub>3</sub>)

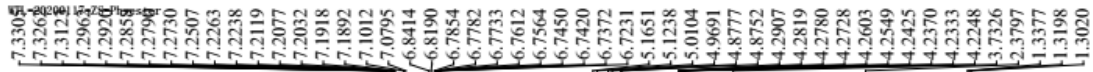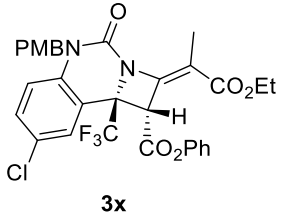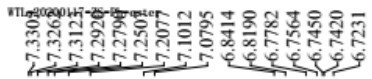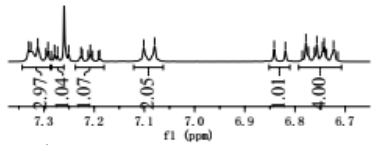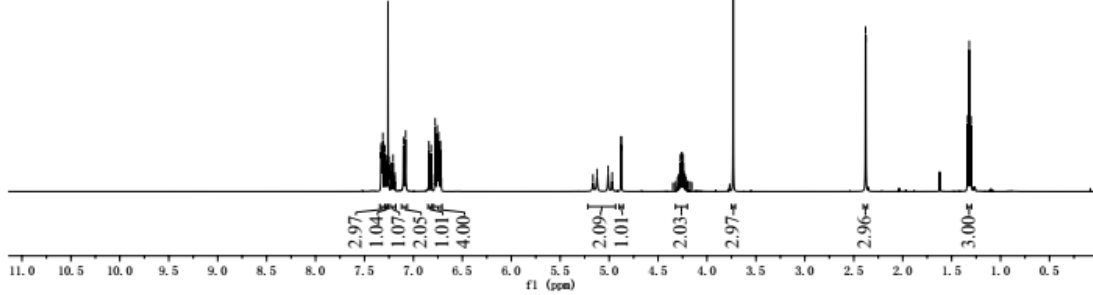

WTL-20200118-ZS-Ph-ester

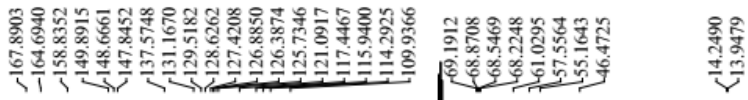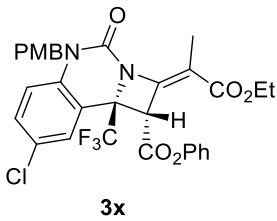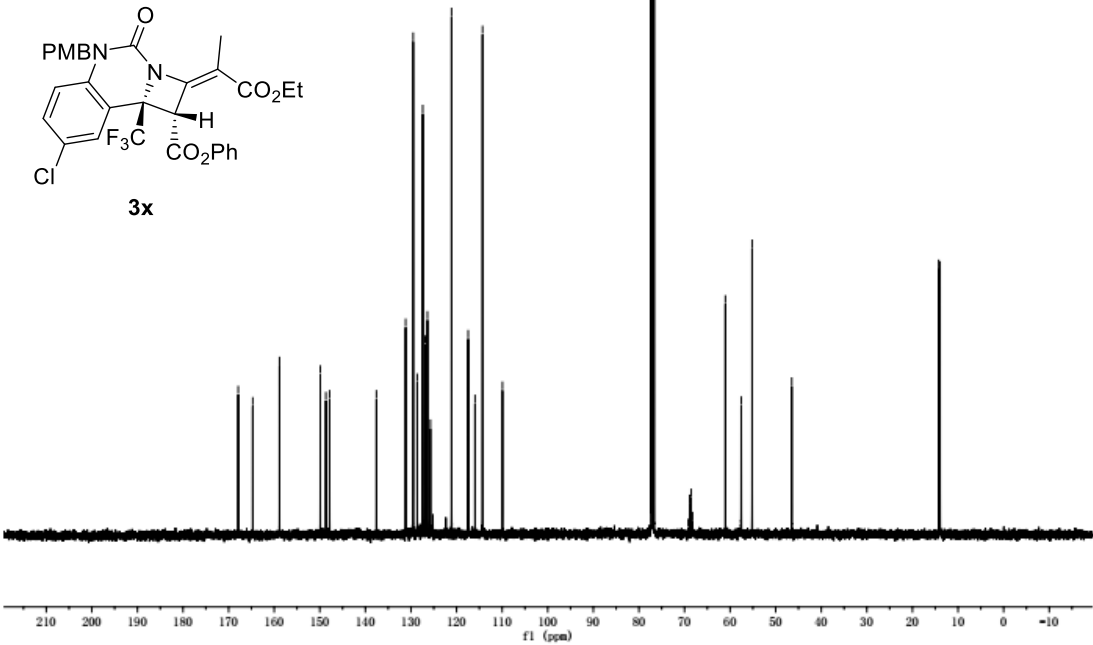

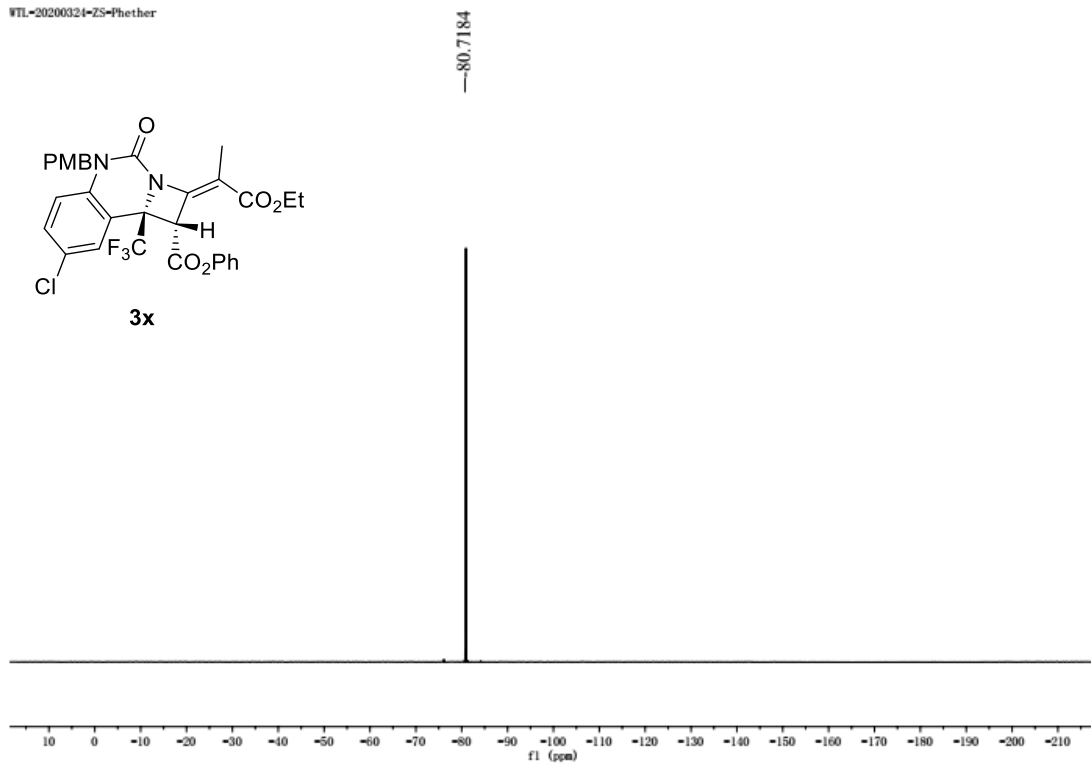

NMR of **3y** (CDCl<sub>3</sub>)

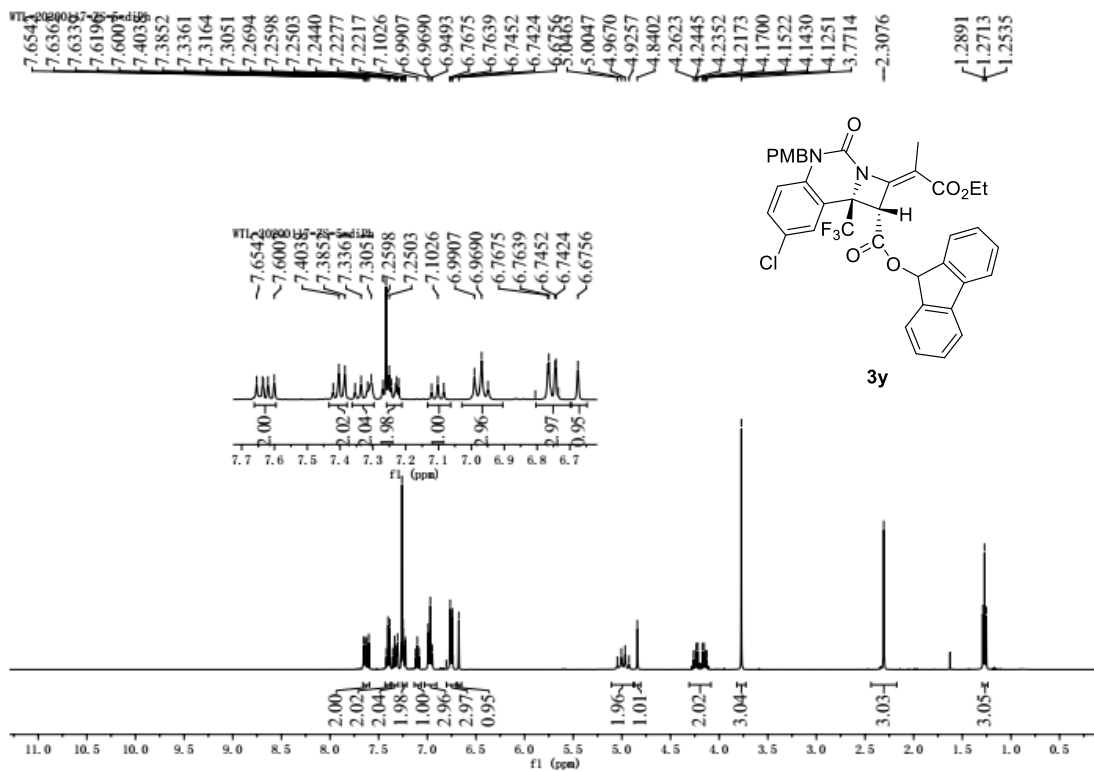

WTL-20200118-ZS-5-diPh

167.9434  
167.0048  
158.8022  
140.9066  
140.8810  
131.2191  
129.6776  
129.5419  
128.7714  
128.0759  
127.7512  
127.2363  
126.9645  
125.9919  
119.9978  
119.8840  
117.3003  
114.4157  
76.6170  
69.2789  
68.9611  
68.6402  
68.3359  
60.9577  
57.9673  
55.2773  
46.6059  
14.2745  
13.9406

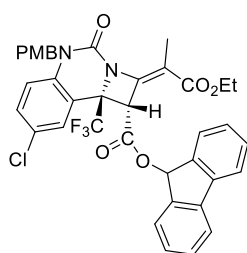

3y

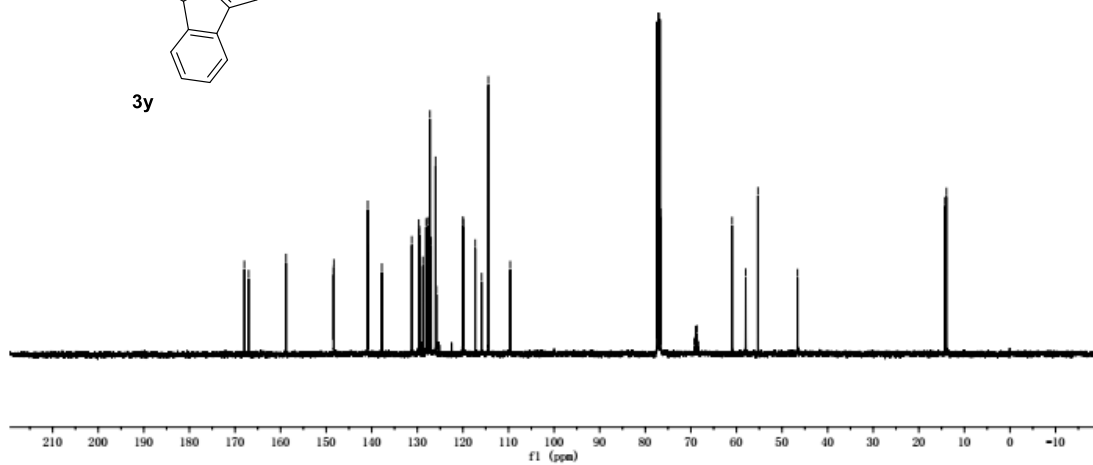

WTL-20200324-ZS-5-diPh

81.0657

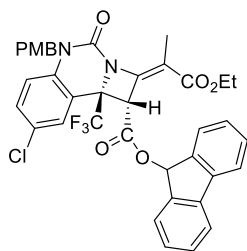

3y

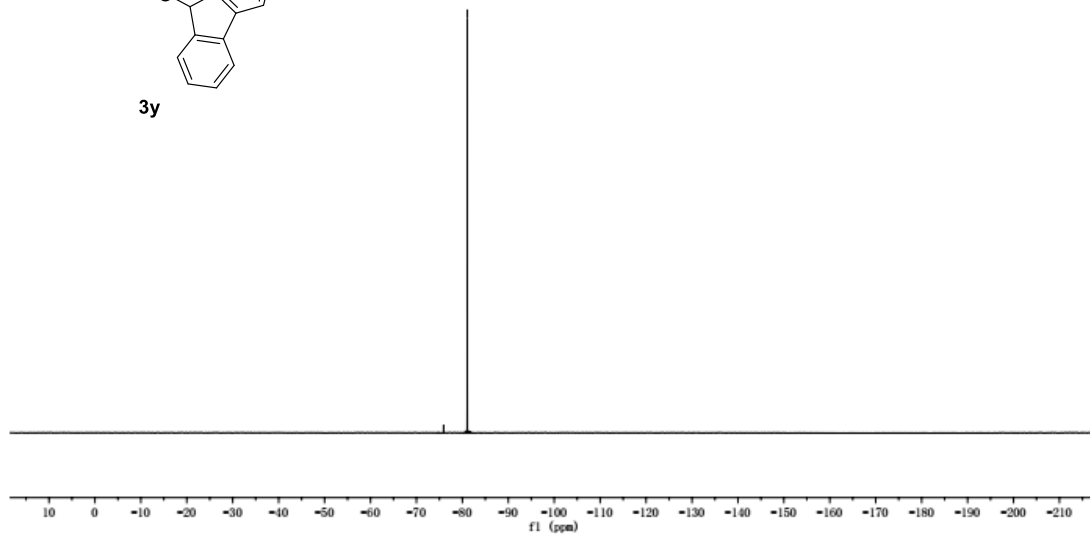

NMR of **3z** (CDCl<sub>3</sub>)

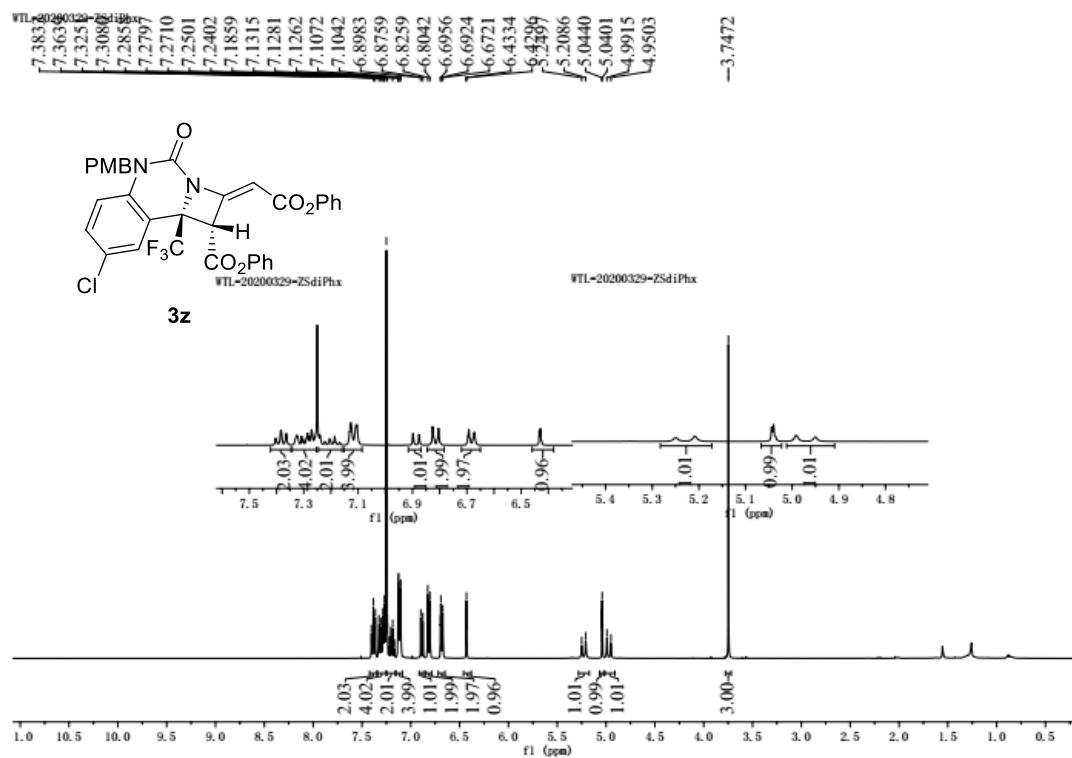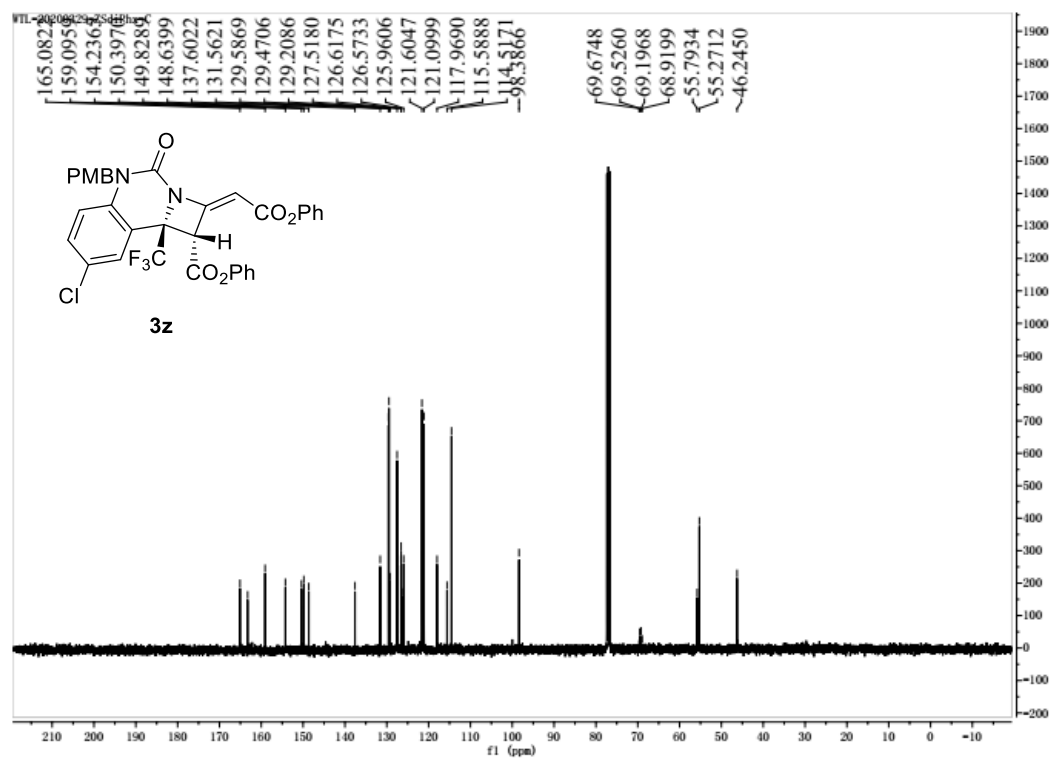

WTL-20200329-ZSdiPhx

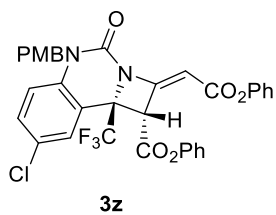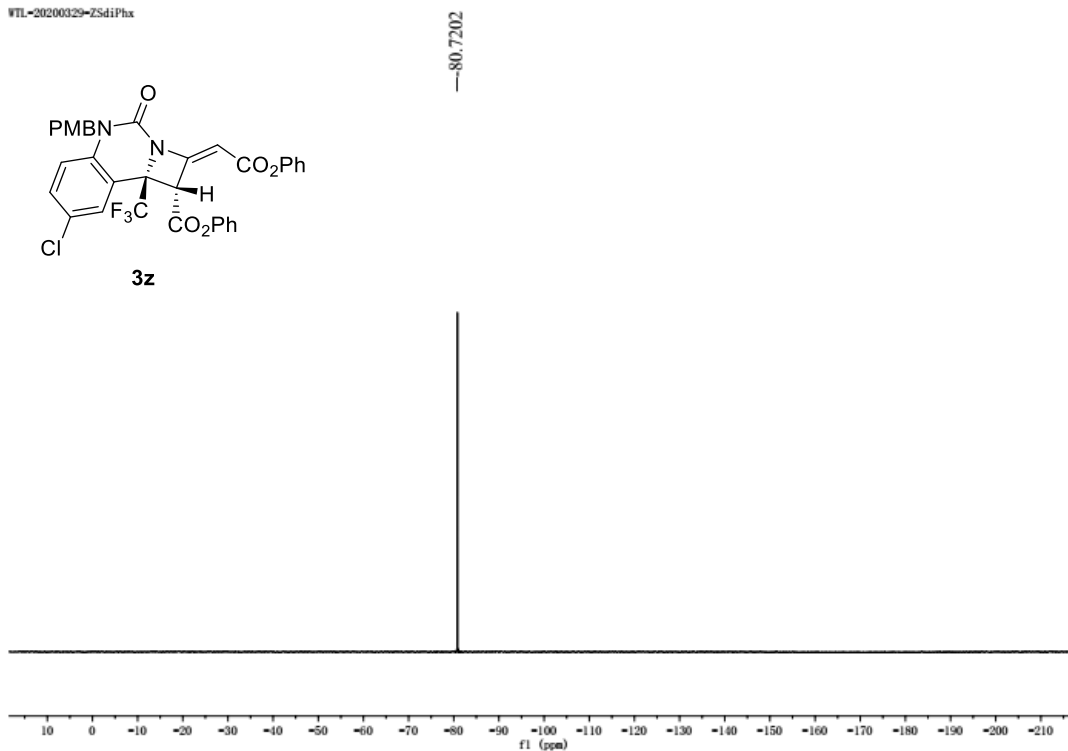

### NMR of 4a (CDCl<sub>3</sub>)

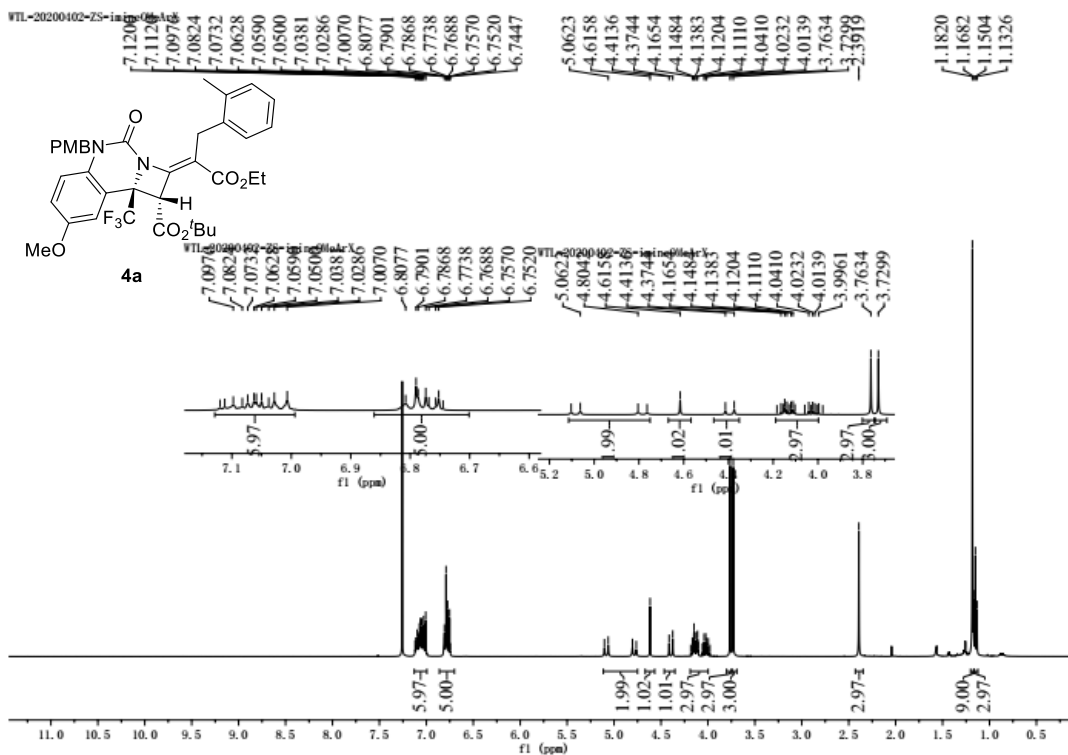

WTL-20200402-ZS-imine0MeArX

167.416  
164.776  
158.754  
155.2414  
150.9084  
148.2328  
139.8566  
136.0514  
132.3488  
129.7625  
128.2470  
127.6898  
127.3076  
125.3822  
125.2459  
116.7976  
116.4527  
115.9285  
114.1669  
111.6873  
110.0627  
-82.7409  
-69.0655  
-68.8040  
-68.4808  
-68.1579  
-60.7061  
-58.4557  
-55.6145  
-55.2448  
-47.0268  
-30.5599  
-27.0441  
-19.8000  
-14.0854

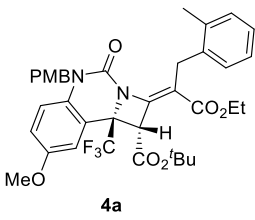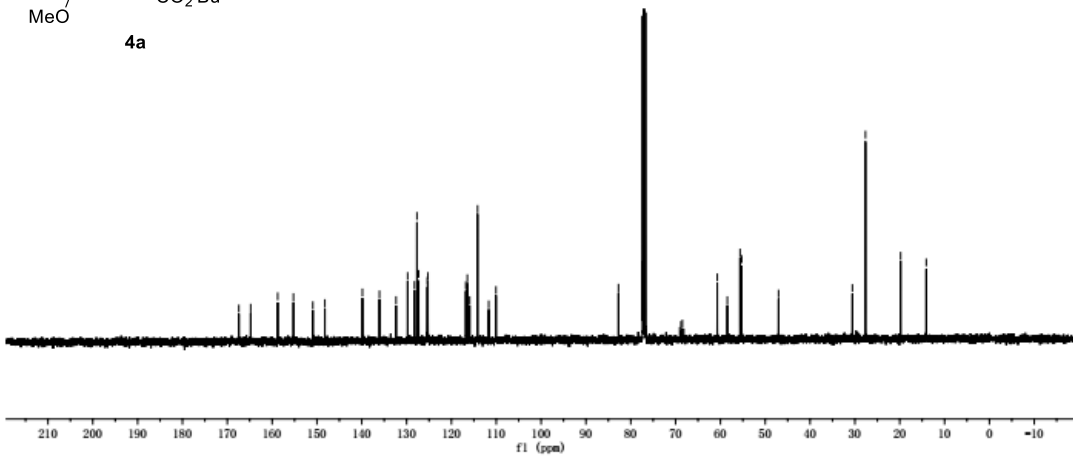

WTL-20200402-ZS-imine0MeArX

-80.7941

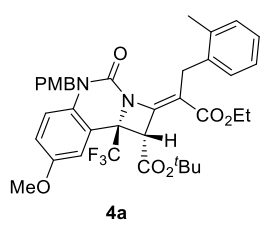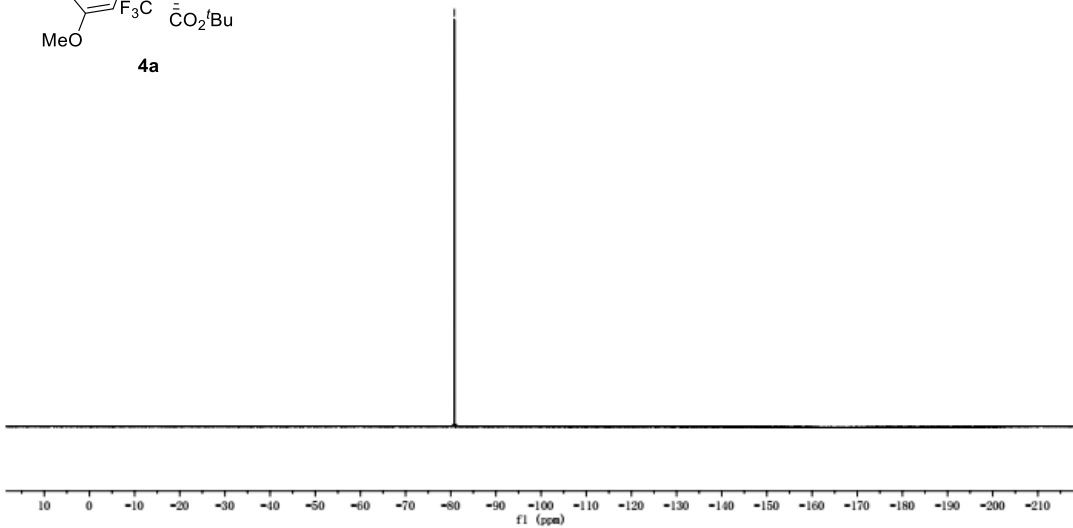

# NMR of 4b (CDCl<sub>3</sub>)

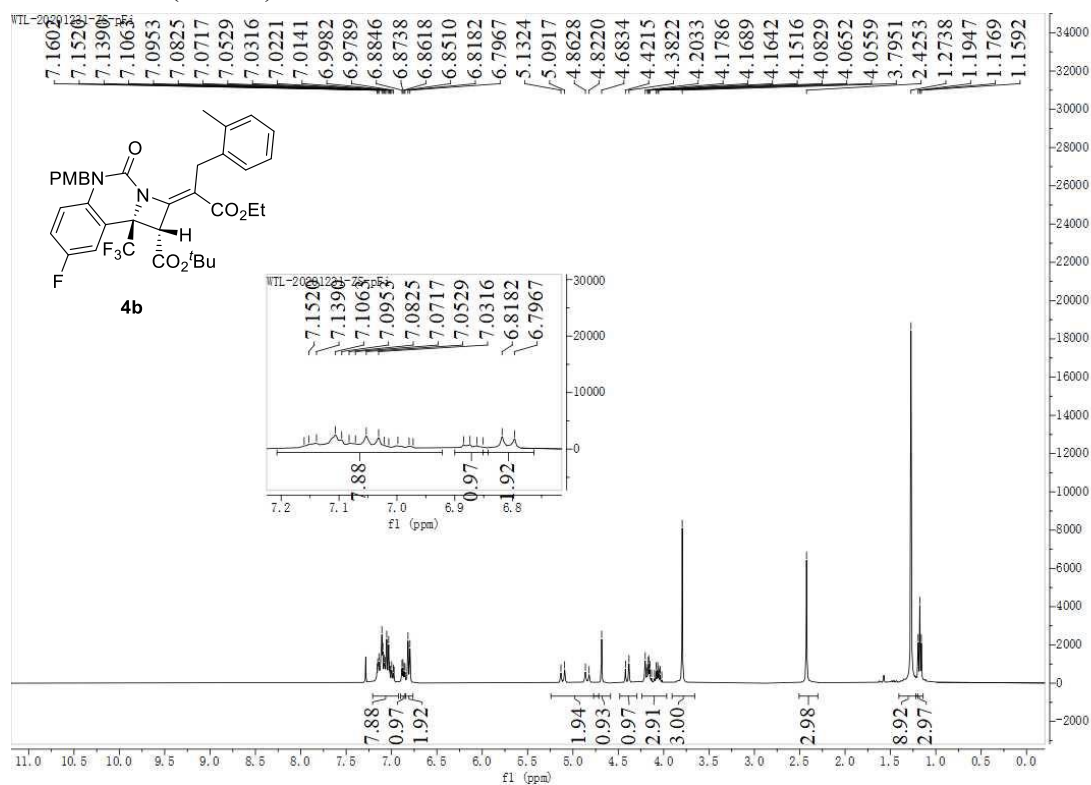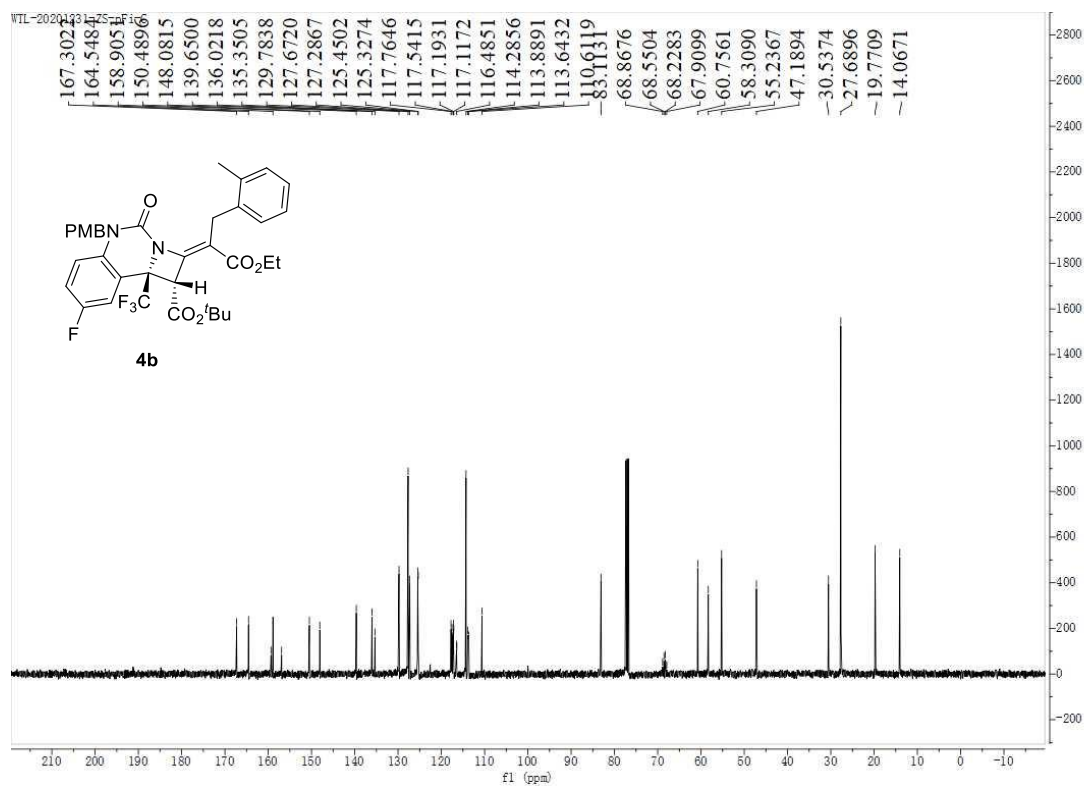

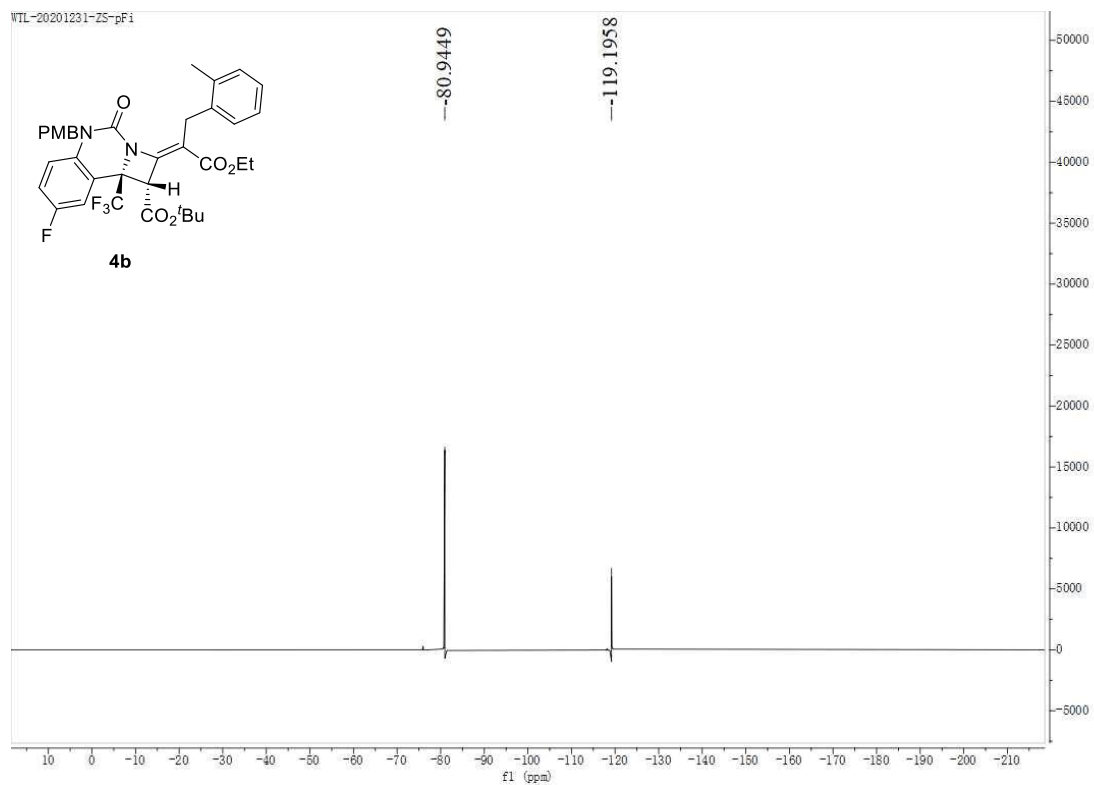

### NMR of **4c** (CDCl<sub>3</sub>)

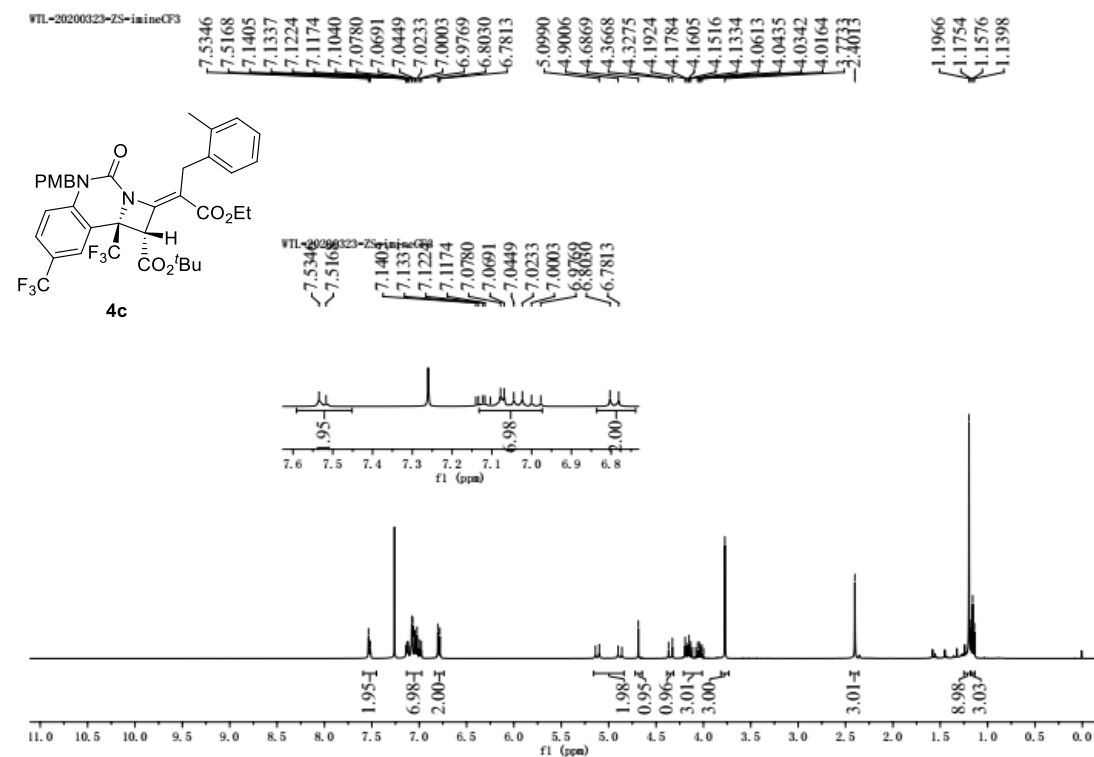



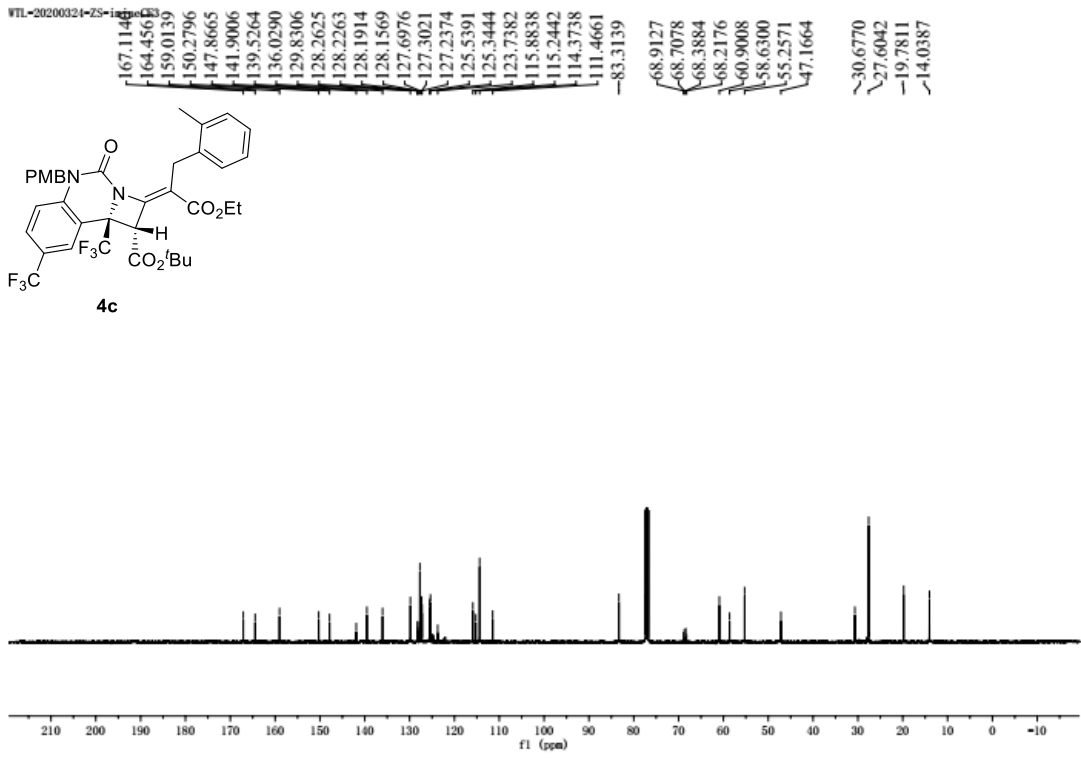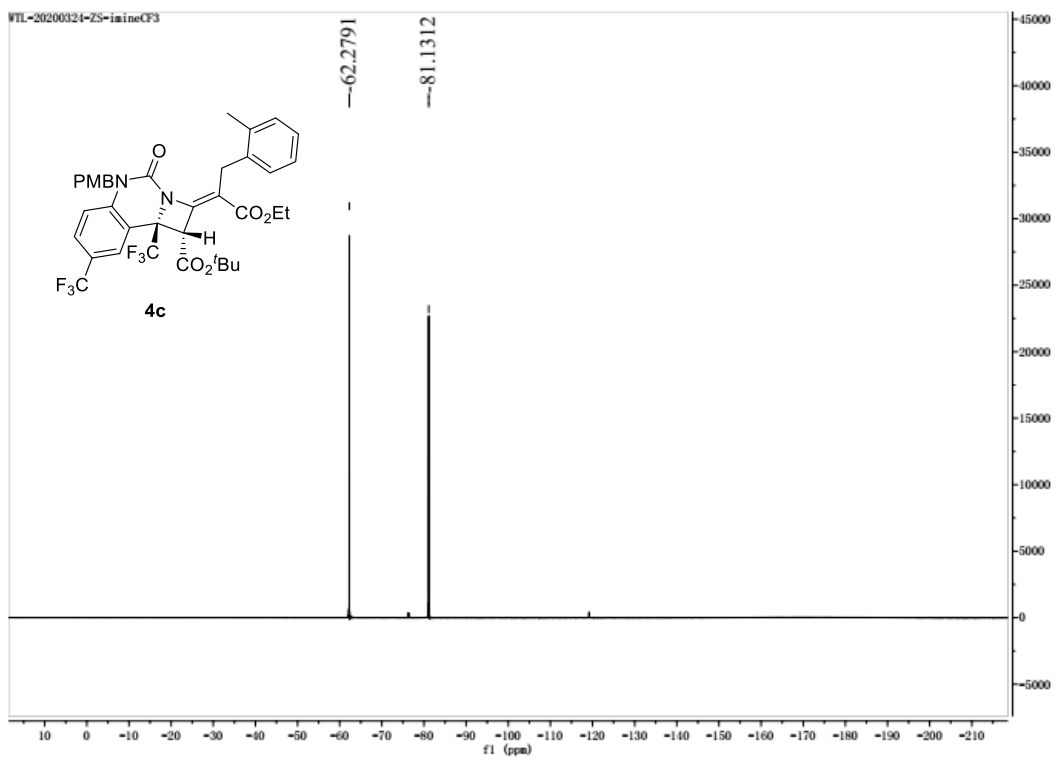

NMR of **4d** (CDCl<sub>3</sub>)

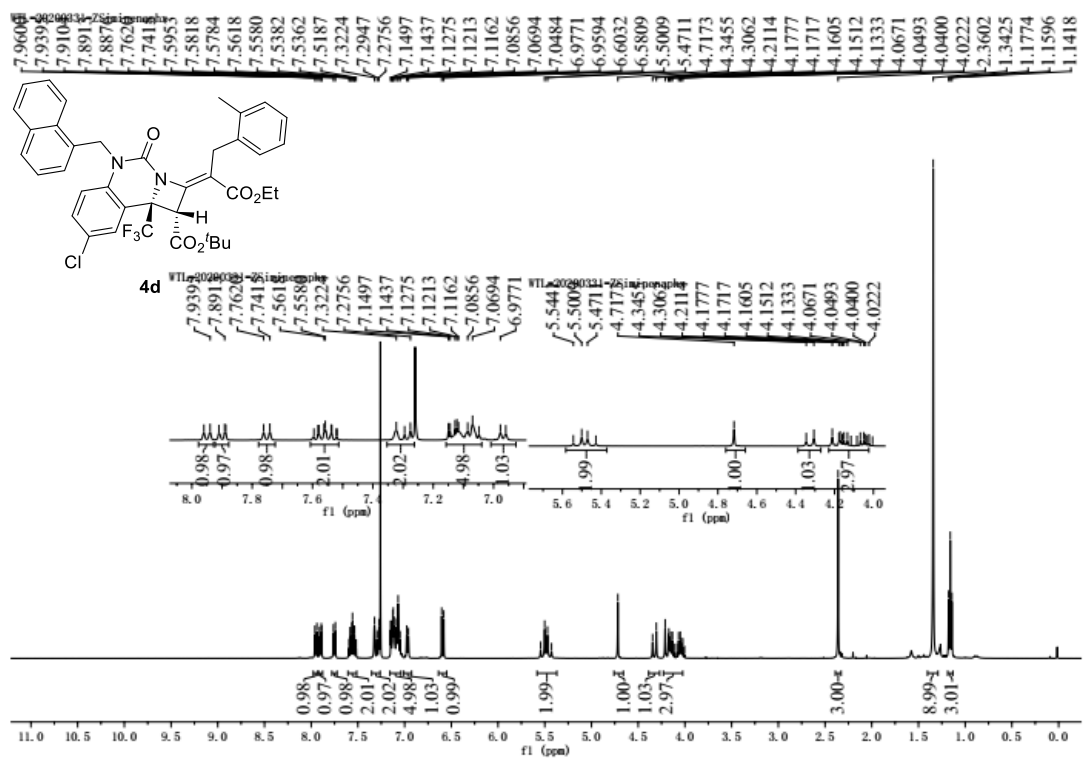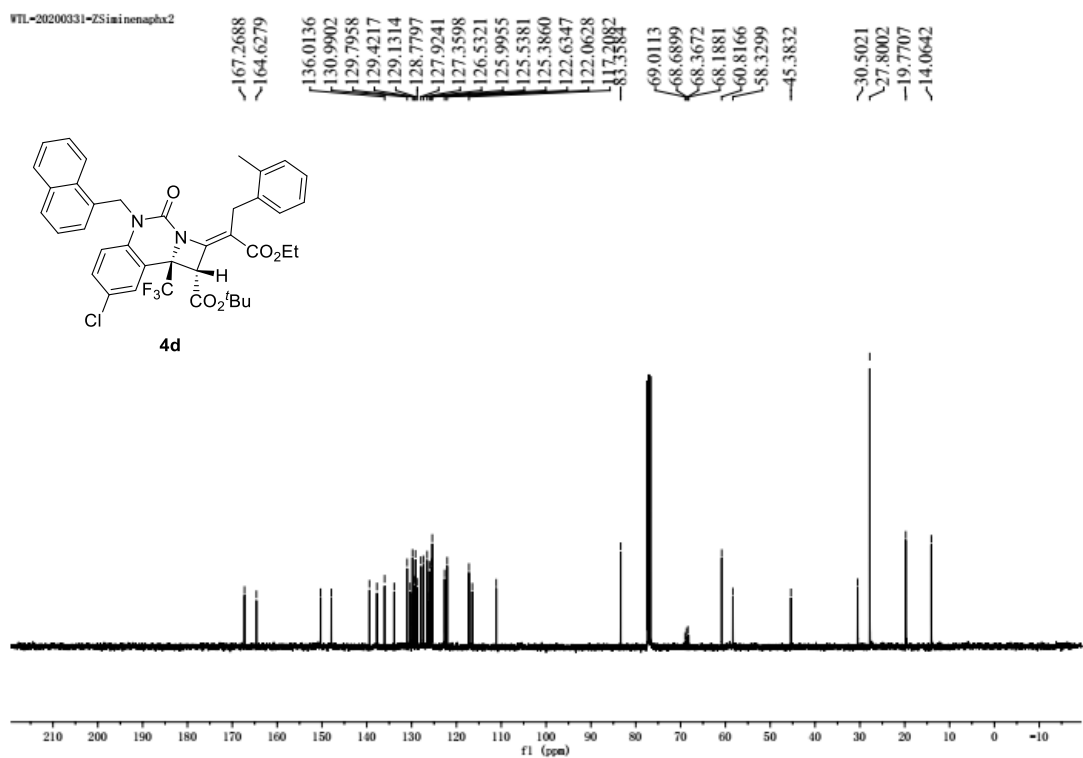

WTL-20200331-ZSiminaphx2

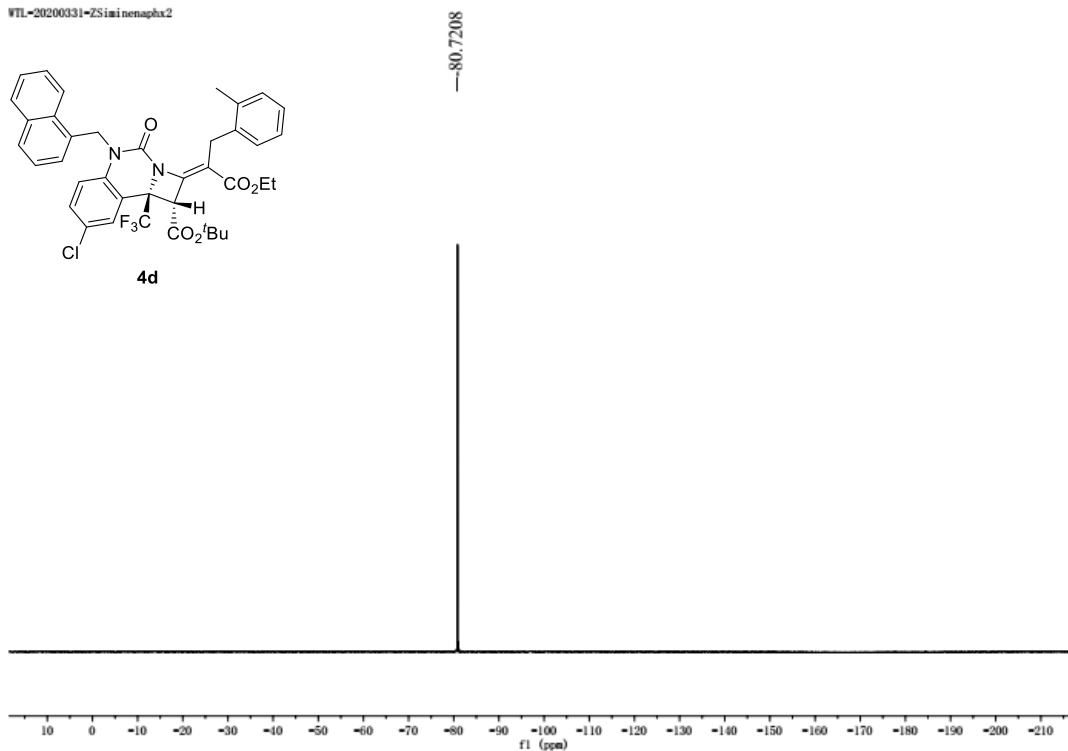

NMR of **5a**(CD<sub>3</sub>OD)

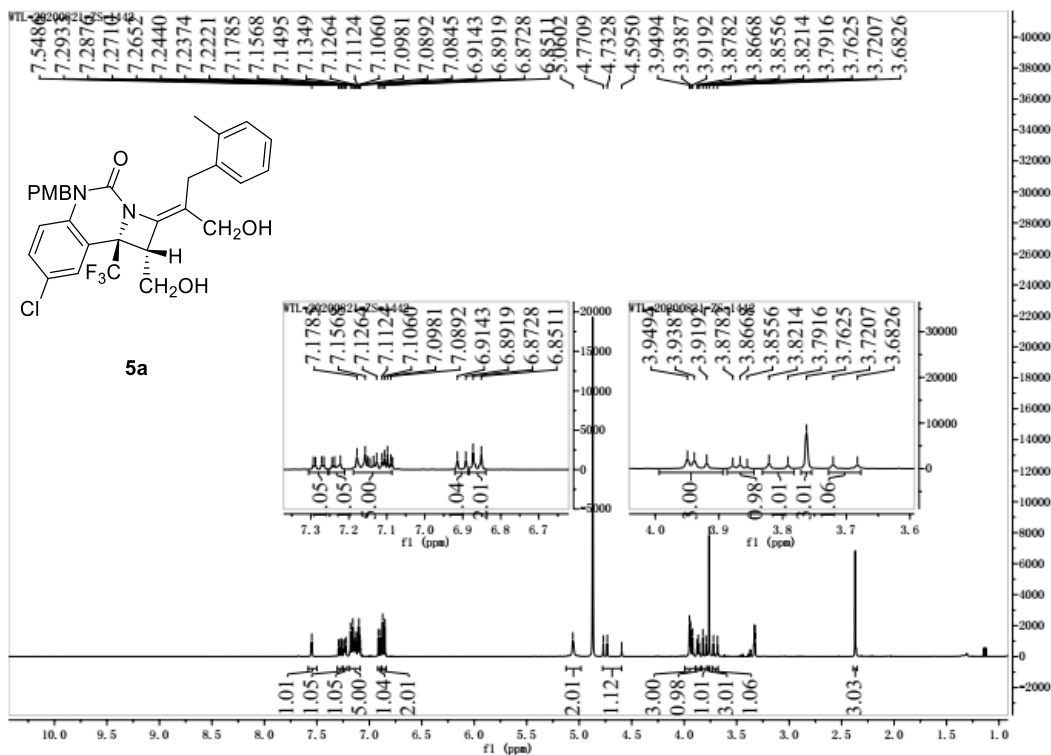

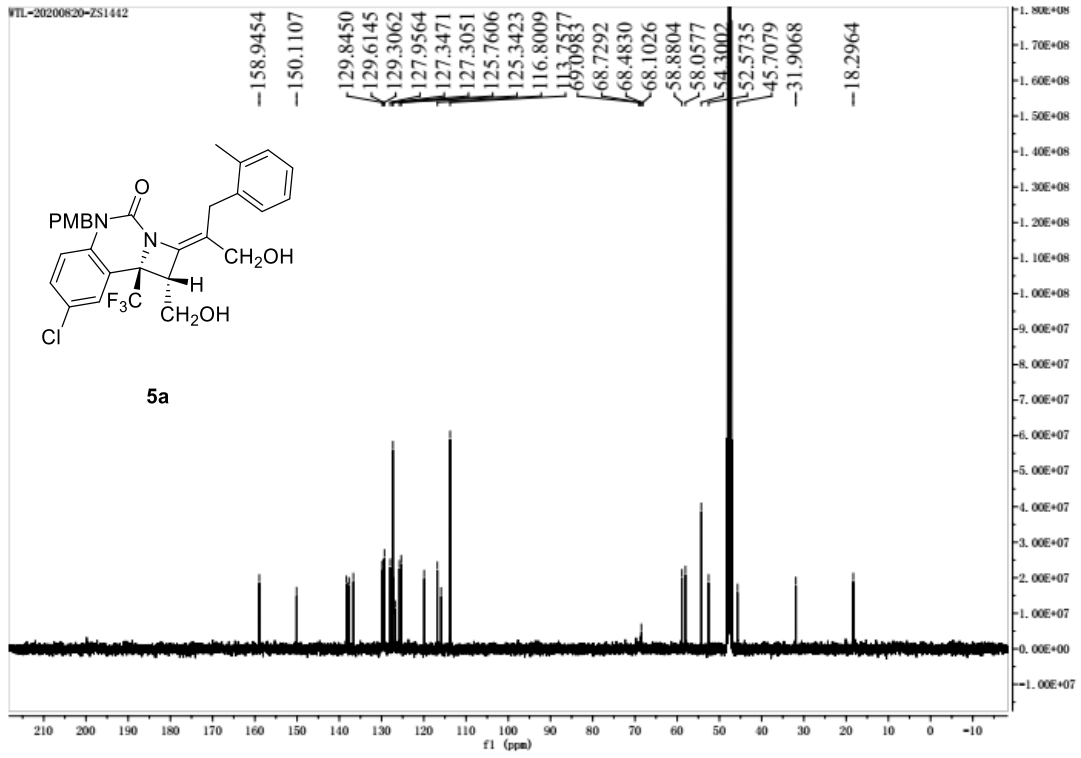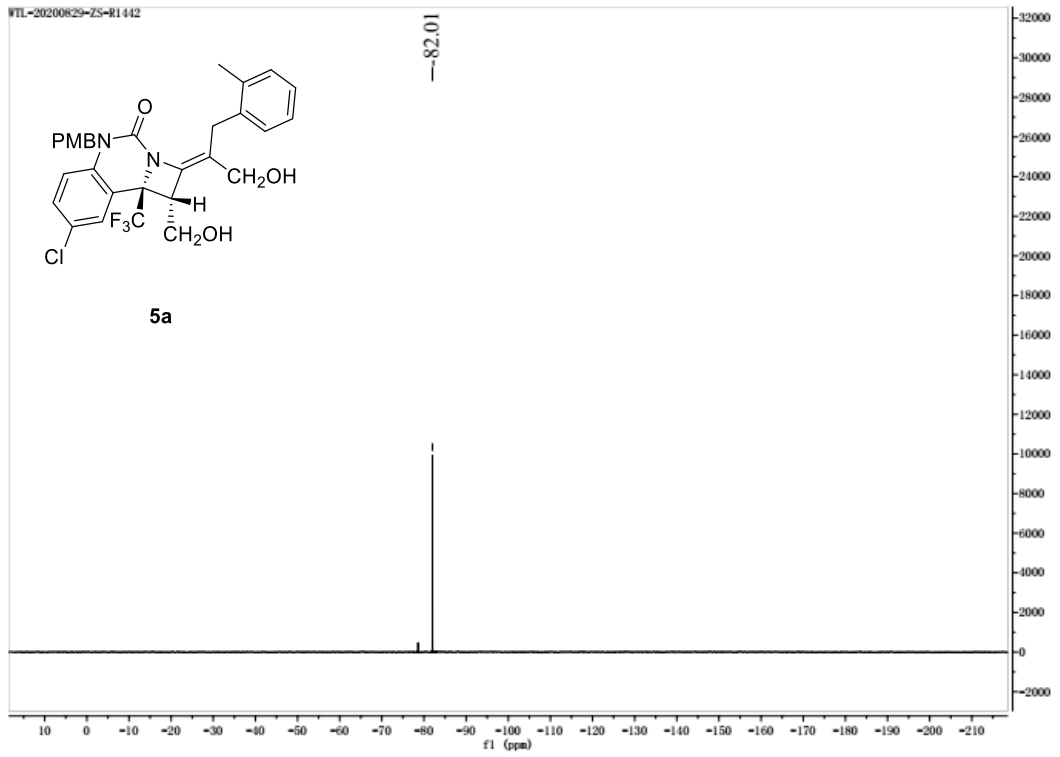

NMR of **5b** (CD<sub>3</sub>OD)

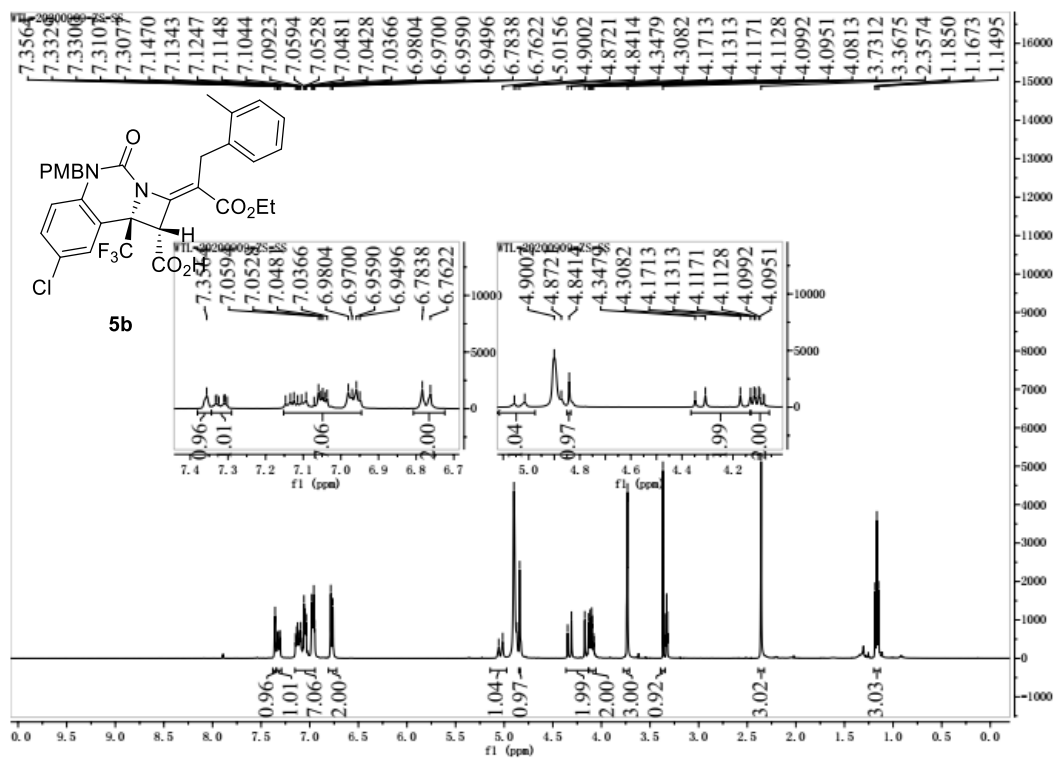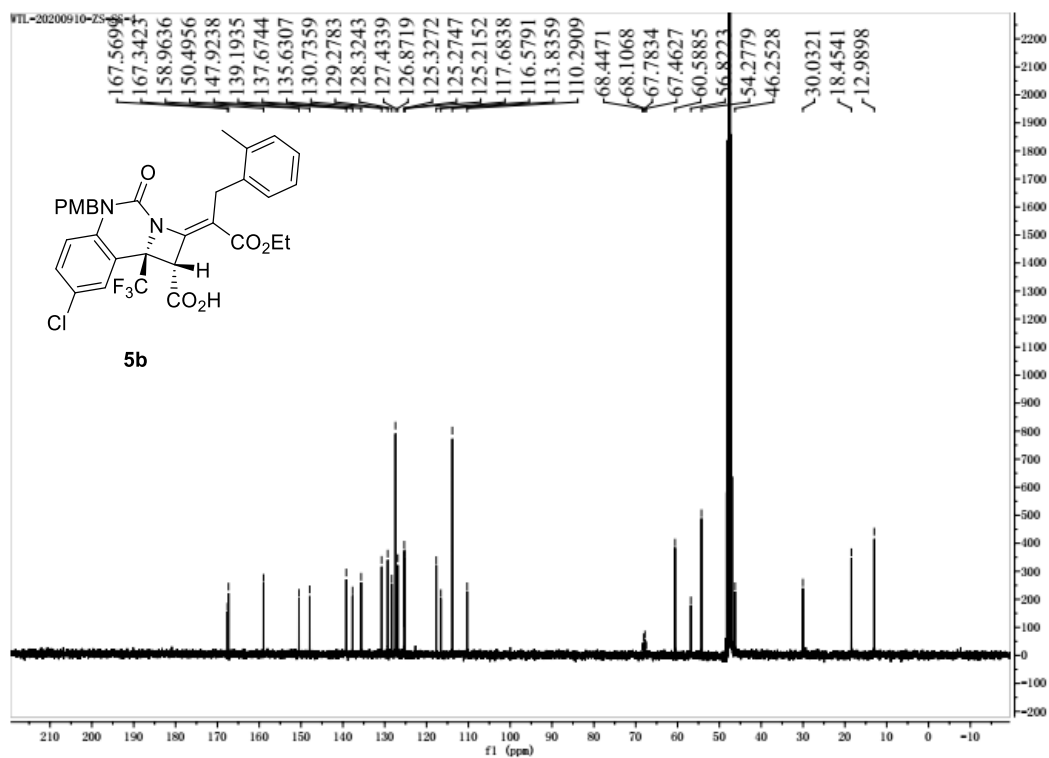

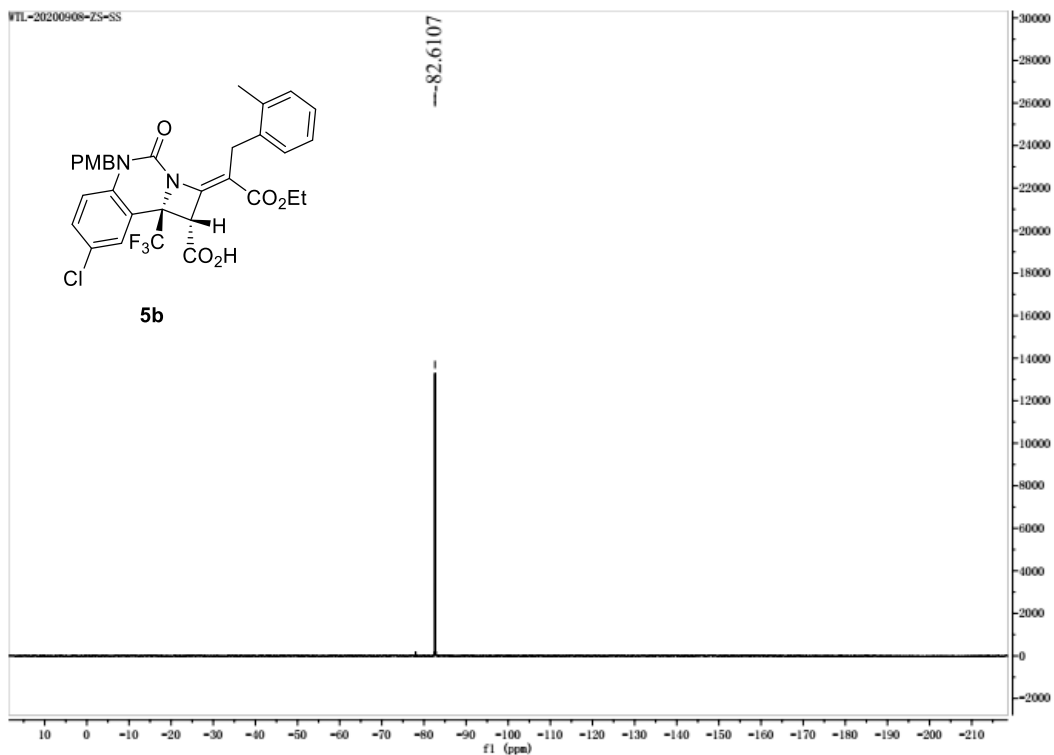

### NMR of **5c** (CD<sub>3</sub>OD)

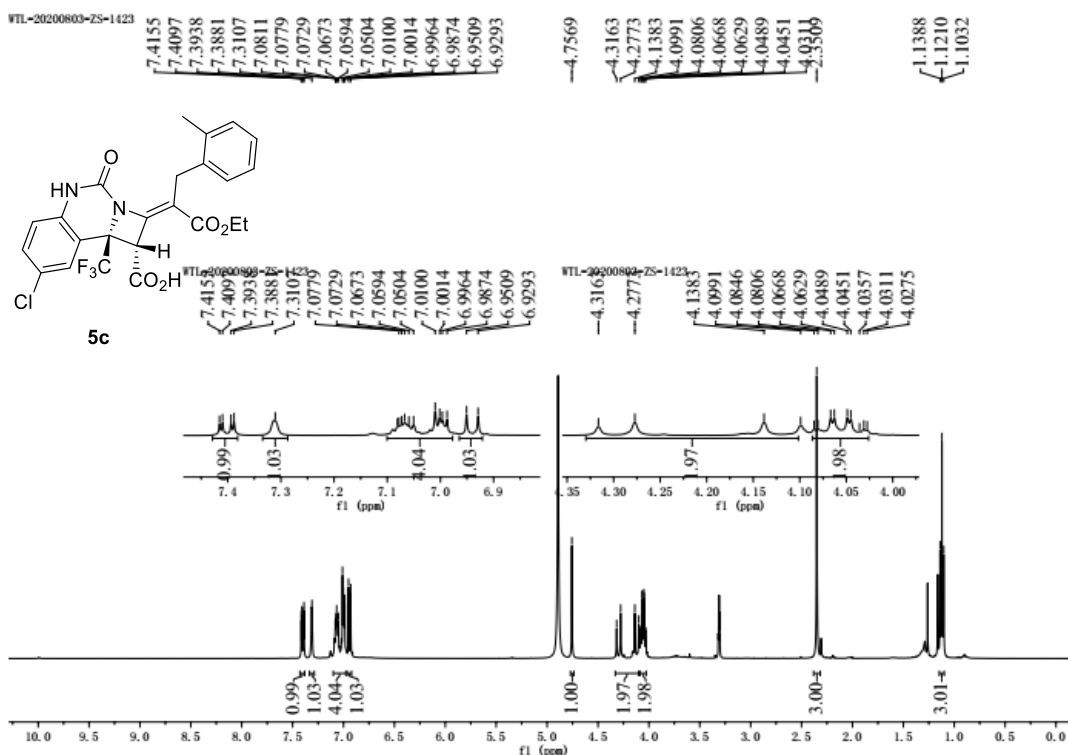

WTL-20200806-ZS-1423

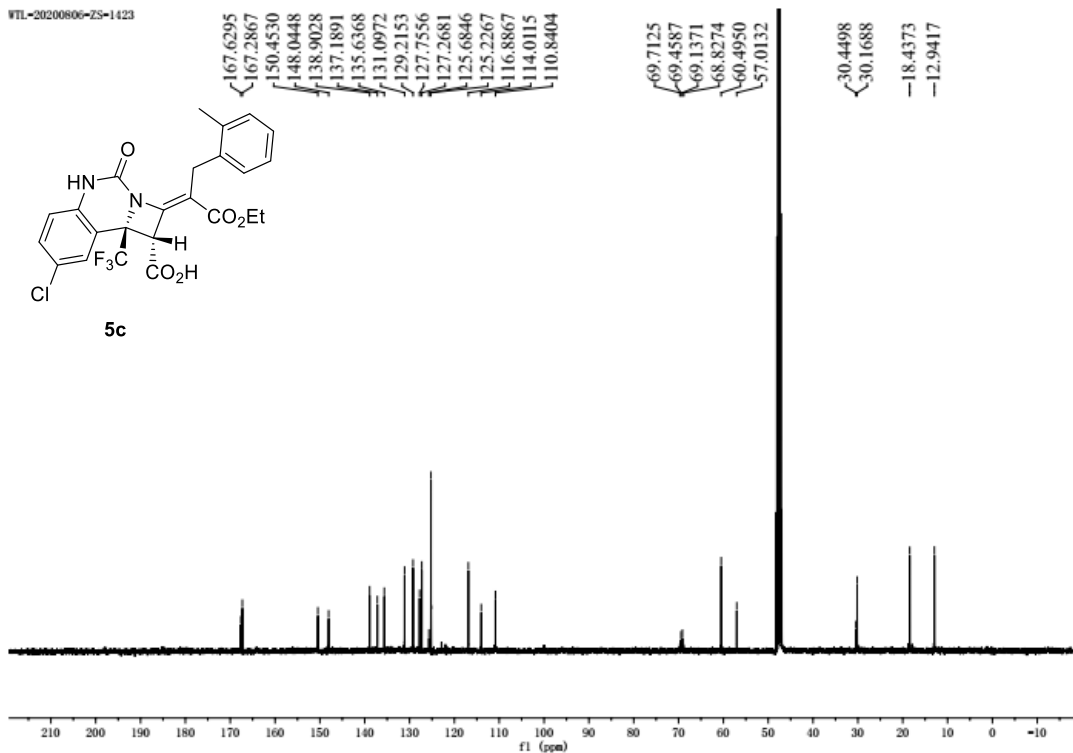

WTL-20200803-ZS-1423

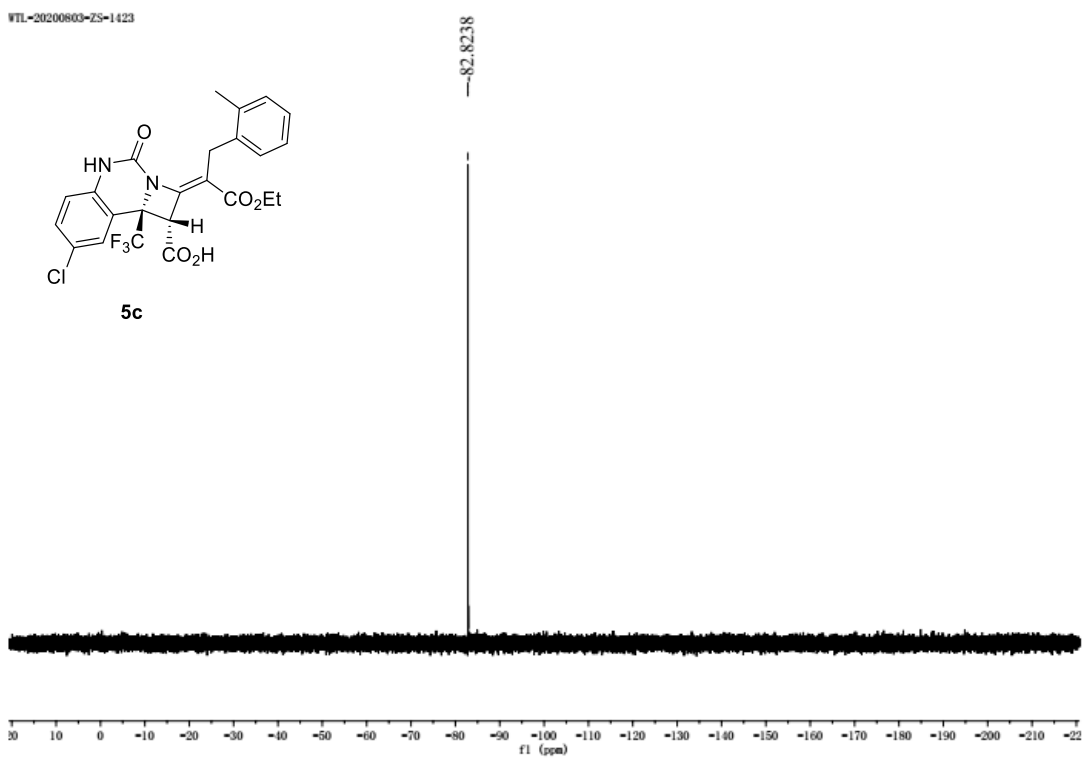

NMR of **5d** (CDCl<sub>3</sub>)

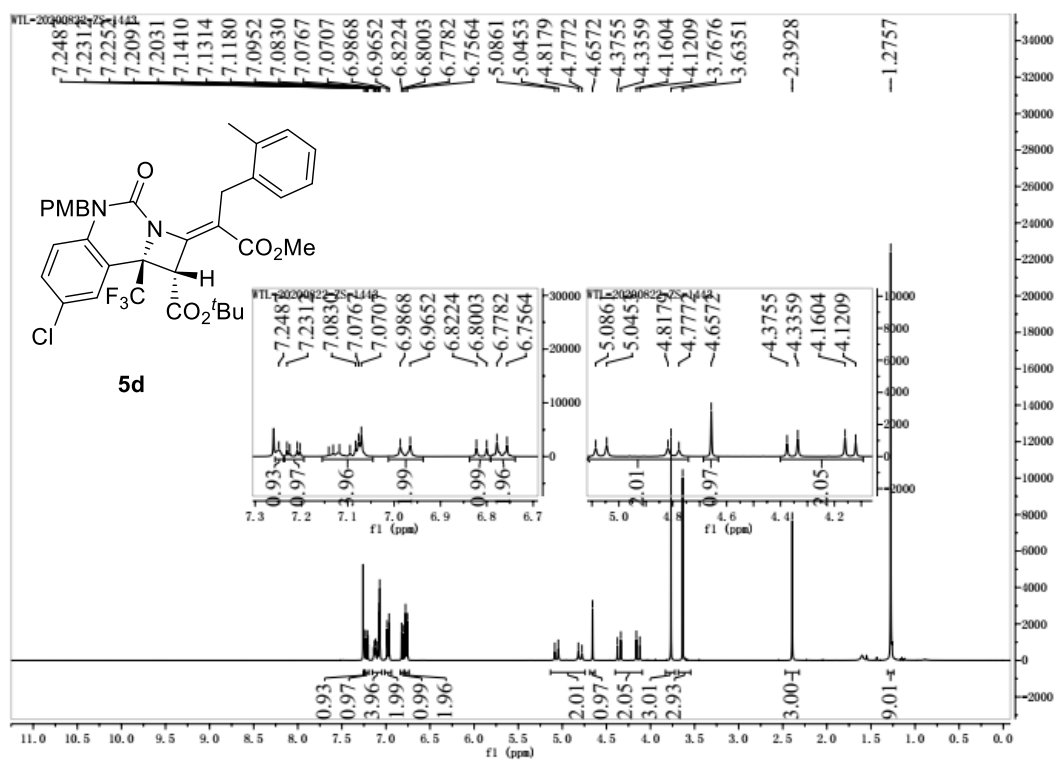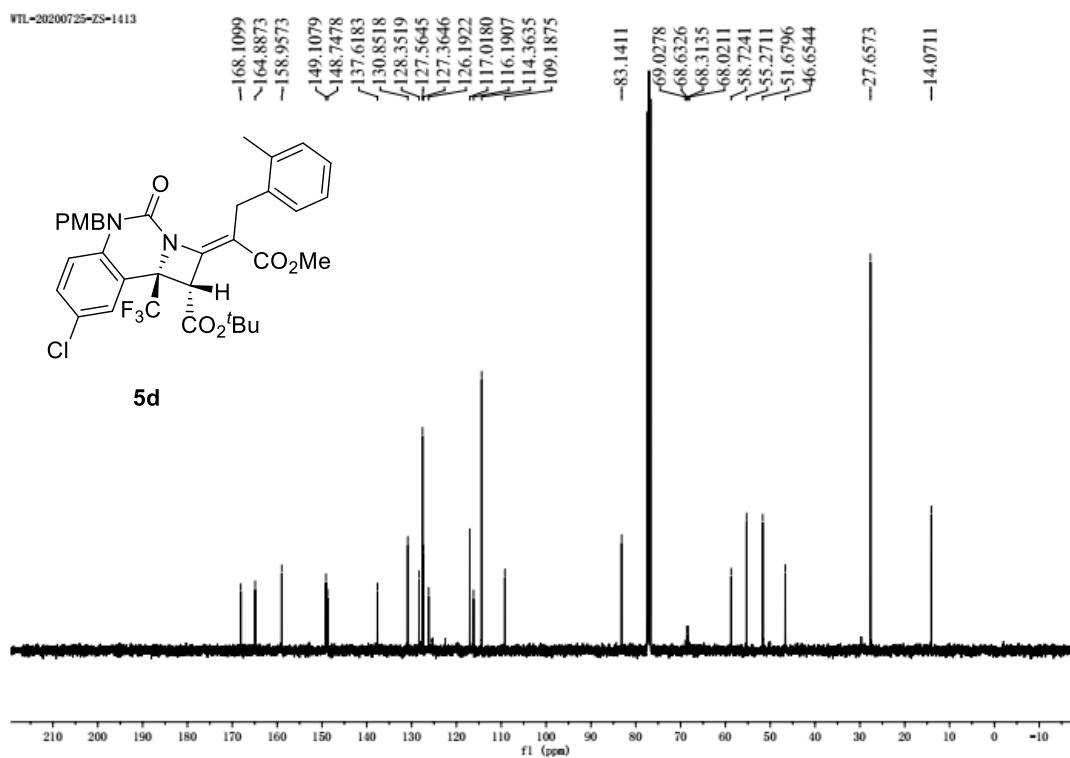



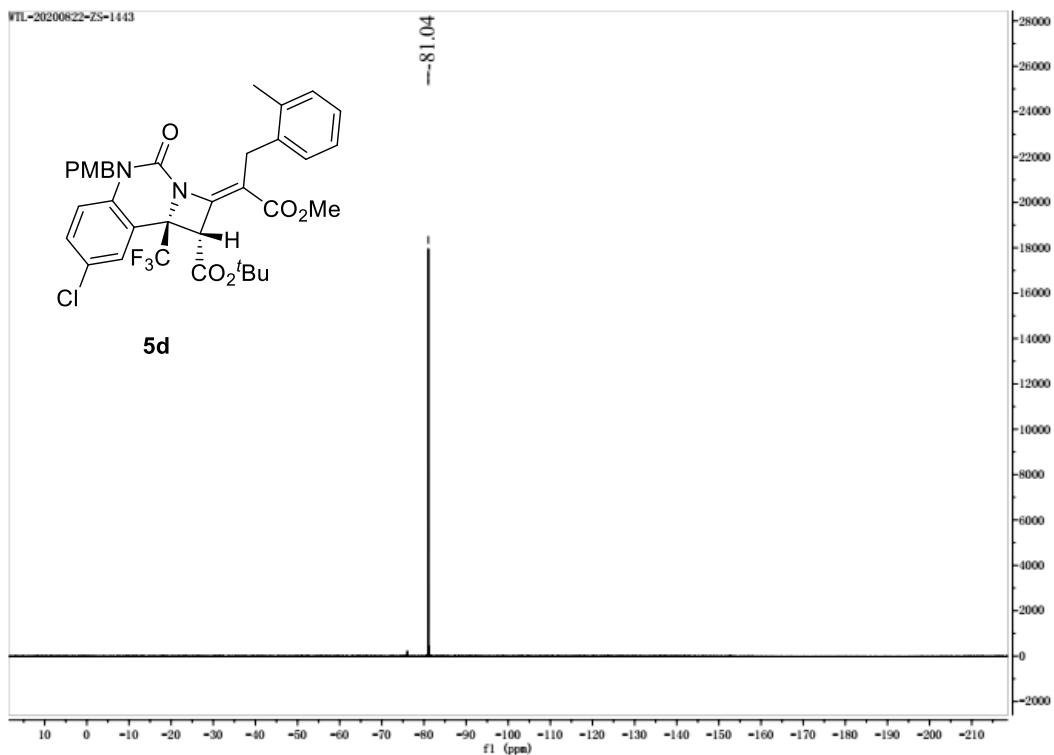

NMR of **5e** ( $CD_3OD$ )

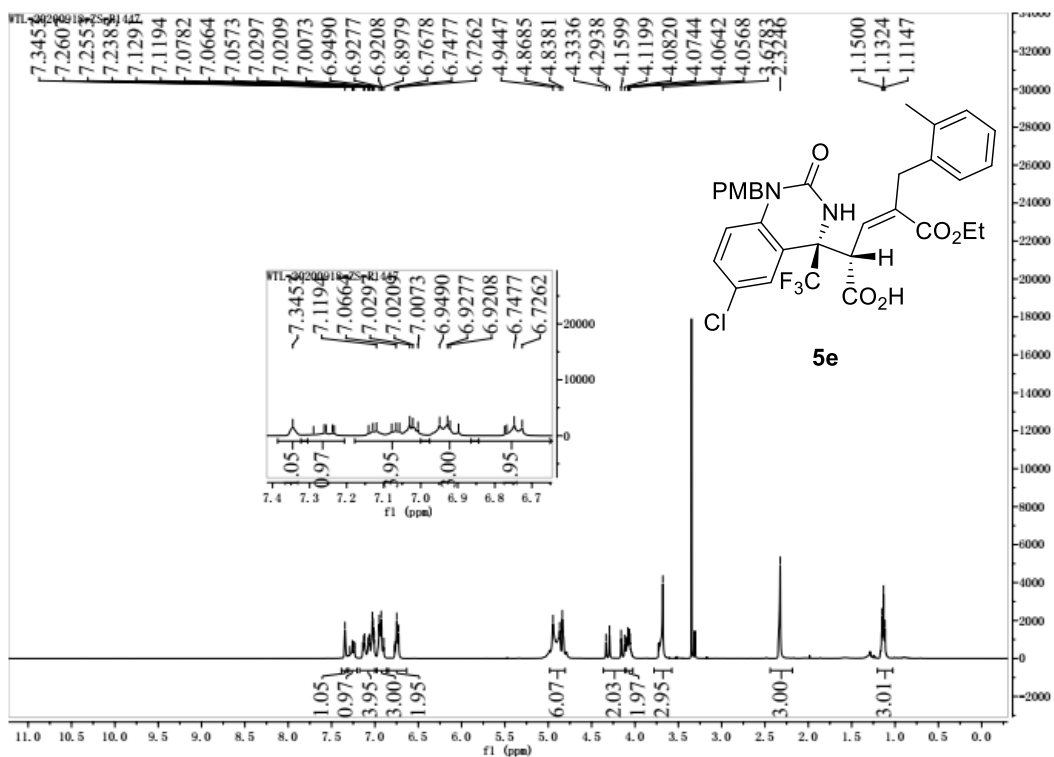

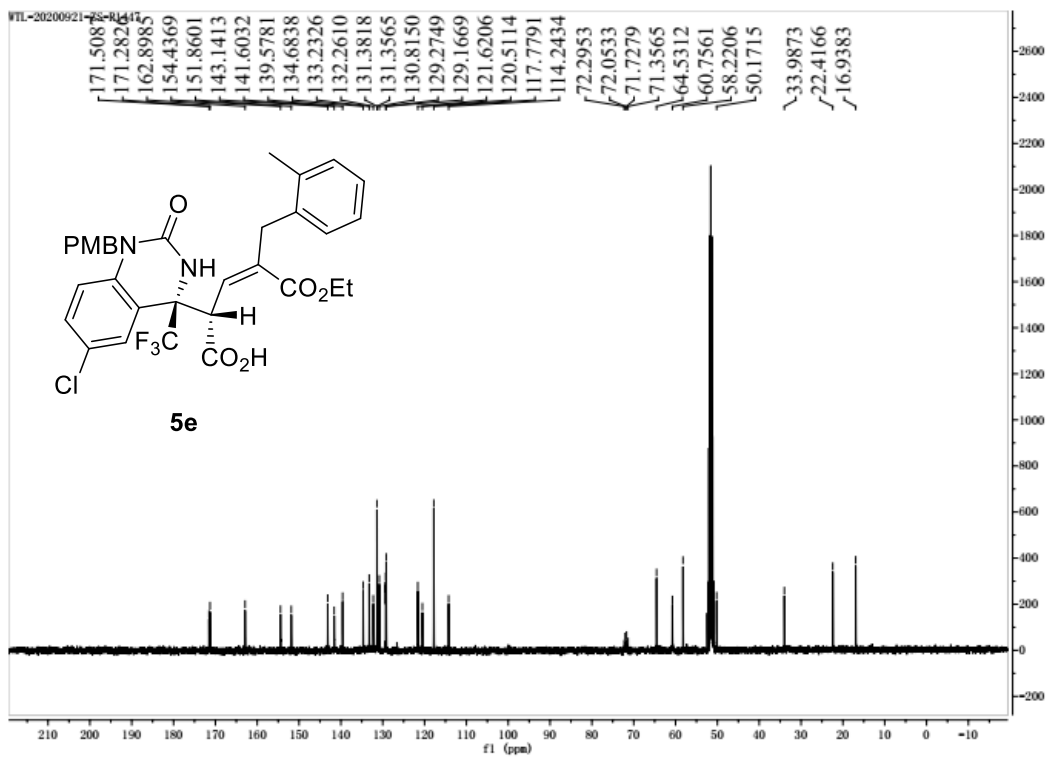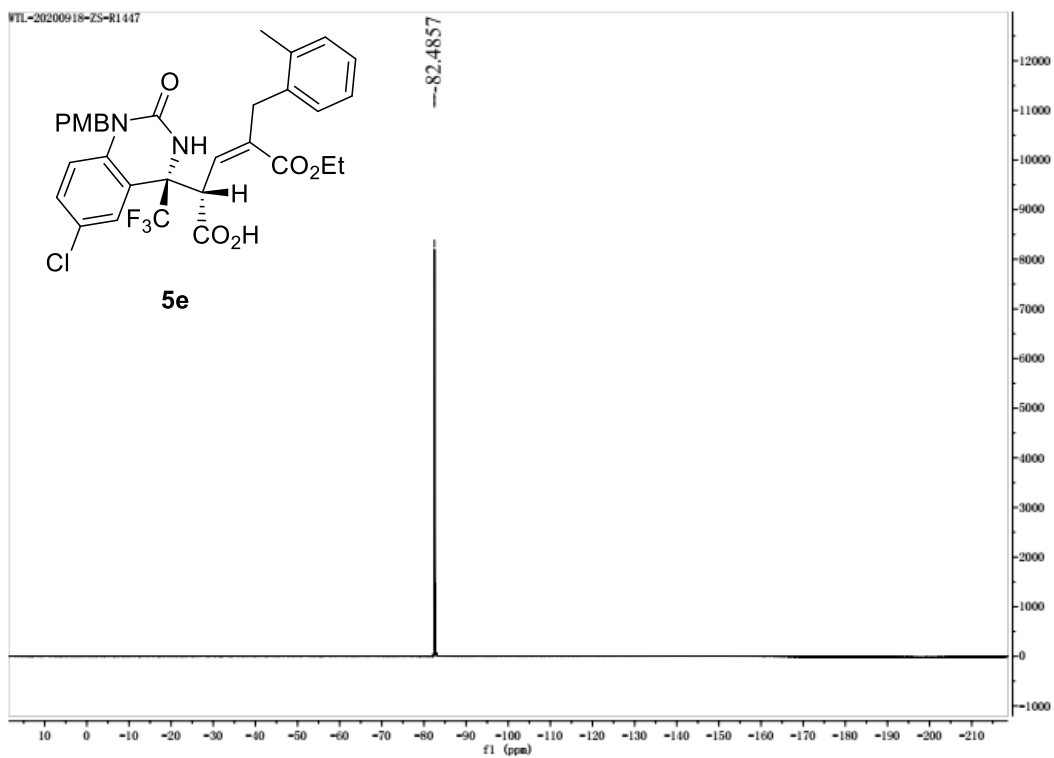

NMR of **5f** (Acetone-d<sub>6</sub>)

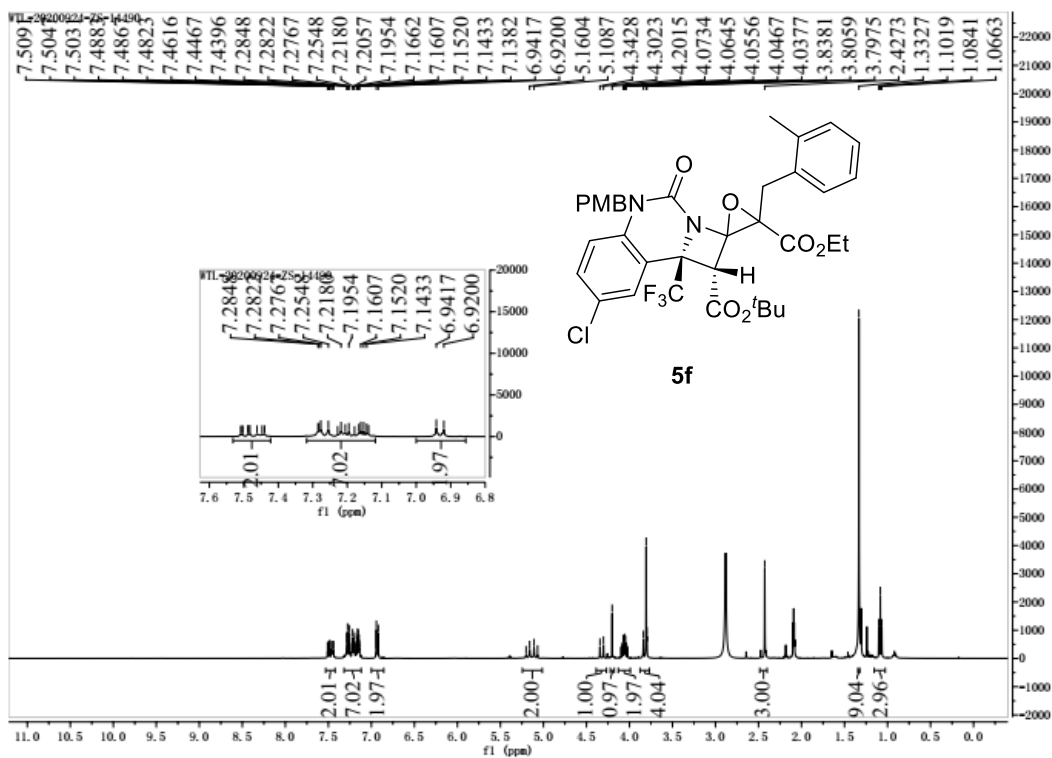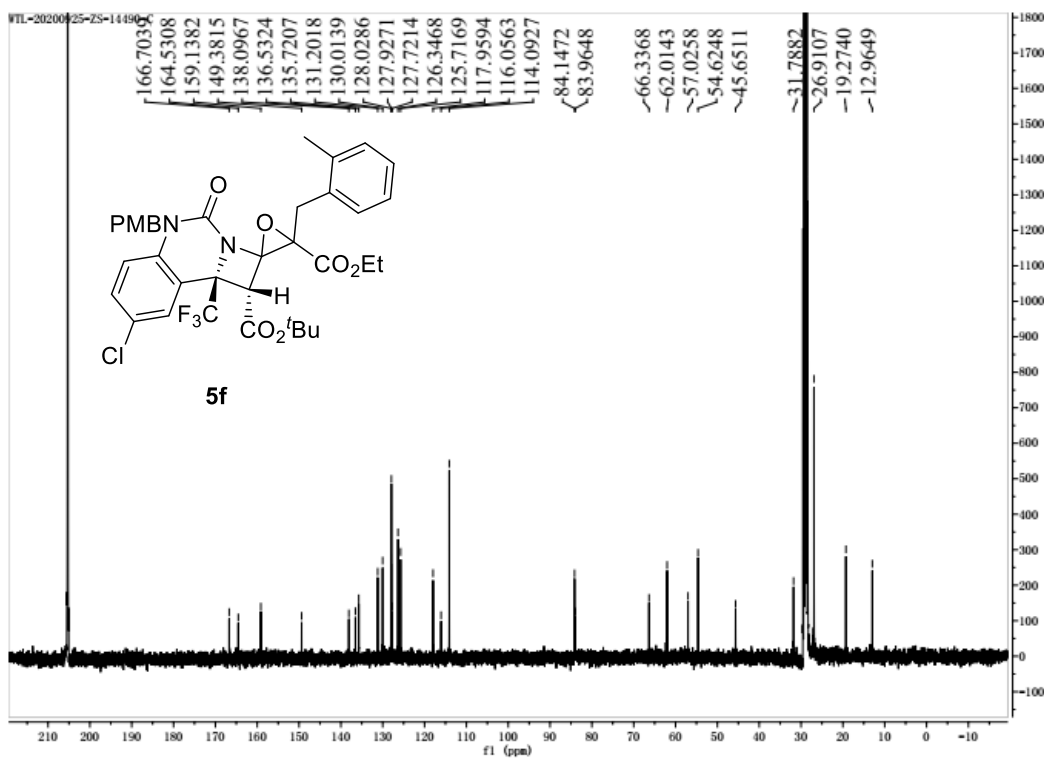

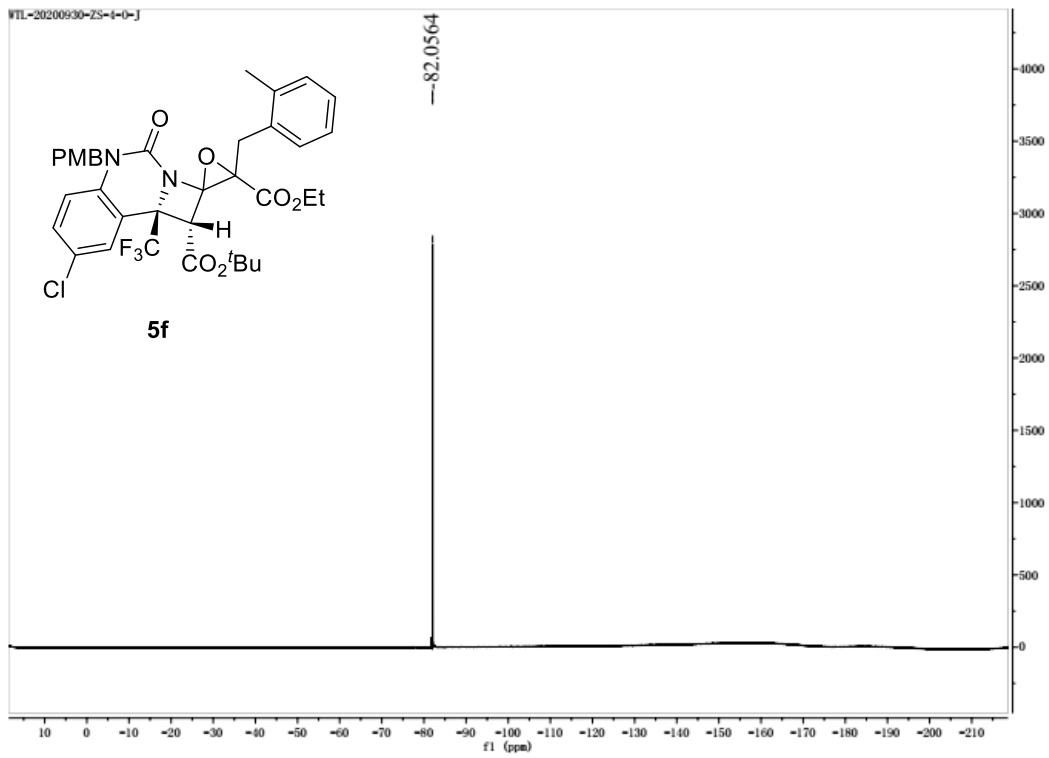

Supplement: d4qo01942c1.pdf [file d4qo01942c1.pdf]
